# Supplementary material for: Transcriptomic Profiling of Breast Cancer Cells Induced by Tumor-Associated Macrophages Generates a Robust Prognostic Gene Signature
Source: Cancers (Basel). 2022 Oct 31;14(21):5364. doi: 10.3390/cancers14215364 (PMC9655582; doi:10.3390/cancers14215364)
Supplement: Supplementary file 1 [file cancers-14-05364-s001.zip]

Archive with 6 entries (6 files):
- Supplementary Figure S1.pdf
- Supplementary Table S1.xlsx
- Supplementary Table S2.xlsx
- Supplementary Table S3.xlsx
- Supplementary Table S4.xlsx
- Supplementary Table S5.xlsm
