# Supplementary material for: Transcriptomic Profiling of Breast Cancer Cells Induced by Tumor-Associated Macrophages Generates a Robust Prognostic Gene Signature
Source: Cancers (Basel). 2022 Oct 31;14(21):5364. doi: 10.3390/cancers14215364 (PMC9655582; doi:10.3390/cancers14215364)
Supplement: Supplementary file 1 [file cancers-14-05364-s001.zip › Supplementary Table S1.xlsx]

## Sheet: Supplementary table 1 DIff_tran
Ensembl Transcript	Ensembl Gene	Gene Symbol	length	biotype	RNAtype	p value	q value	Fold Change of Treatment2vs Treatment1	style	MDMs-1	MDMs-2	MDMs-3	TAMs-1	TAMs-2	TAMs-3
ENST00000004531	ENSG00000003989	SLC7A2	7560	protein_coding	mRNA	0.00184645	0.332027	6.80992	up	0.174417	1.17678	0.177526	7.90851	8.63236	9.3481
ENST00000054666	ENSG00000049245	VAMP3	2205	protein_coding	mRNA	0.0409323	0.560835	1.80755	up	11.5432	9.74058	2.0176	12.3407	10.5716	11.5891
ENST00000078527	ENSG00000060642	PIGV	2367	protein_coding	mRNA	0.0400774	0.555181	1.35613	up	1.18021	1.62735	2.32417	2.74076	2.66861	2.62888
ENST00000085068	ENSG00000063241	ISOC2	1122	protein_coding	mRNA	0.0451713	0.585063	1.44684	up	2.93551	2.32988	3.27861	3.72154	4.89952	5.28241
ENST00000164133	ENSG00000068971	PPP2R5B	2745	protein_coding	mRNA	0.00390194	0.367318	1.48664	up	3.36655	3.45328	3.02383	4.79921	5.64213	5.56697
ENST00000193322	ENSG00000081087	OSTM1	4467	protein_coding	mRNA	0.0194029	0.381446	1.5553	up	3.73694	3.1856	2.02993	4.96488	4.42621	5.58696
ENST00000199764	ENSG00000086548	CEACAM6	2700	protein_coding	mRNA	0.0241892	0.426102	1.88465	up	5.17261	4.6897	2.50316	8.17094	6.45059	10.1012
ENST00000202816	ENSG00000089048	ESF1	3216	protein_coding	mRNA	0.00402191	0.367318	1.2995	up	7.09433	7.16957	5.28144	8.90861	8.22458	8.56772
ENST00000202917	ENSG00000089127	OAS1	1816	protein_coding	mRNA	0.000233933	0.121689	8.47923	up	0.600273	0.388942	0.782996	15.0324	11.0431	11.9542
ENST00000206474	ENSG00000092036	HAUS4	1642	protein_coding	mRNA	0.0484342	0.603514	1.53267	up	5.94671	6.84884	2.28305	6.00387	9.40712	6.72146
ENST00000215794	ENSG00000184979	USP18	2129	protein_coding	mRNA	0.0326459	0.501878	2.11394	up	3.80207	3.17479	3.82522	9.87243	6.01688	11.1834
ENST00000216117	ENSG00000100292	HMOX1	1822	protein_coding	mRNA	0.0272332	0.454424	1.33318	up	2.6934	3.45098	2.70961	3.8068	4.52239	4.33248
ENST00000216465	ENSG00000100577	GSTZ1	1338	protein_coding	mRNA	0.00421639	0.367318	4.16042	up	2.88129	2.45291	0.694995	9.28223	13.6915	8.59356
ENST00000217456	ENSG00000101474	APMAP	2430	protein_coding	mRNA	0.0301211	0.480895	1.48474	up	20.8848	24.7954	39.1081	41.431	40.6579	44.3785
ENST00000217958	ENSG00000101843	PSMD10	1546	protein_coding	mRNA	0.0136906	0.367318	1.2635	up	15.1525	19.8189	6.71969	16.3472	14.9557	15.3461
ENST00000218328	ENSG00000086758	HUWE1	5488	processed_transcript	lncRNA	0.0303877	0.483218	1.2442	up	0.036577	0	0	0.149943	0.35129	0.281323
ENST00000220244	ENSG00000103888	CEMIP	7226	protein_coding	mRNA	0.0487216	0.605414	2.65871	up	0	0	0.035789	0.639774	1.96795	3.0012
ENST00000220853	ENSG00000104412	EMC2	1243	protein_coding	mRNA	0.00700955	0.367318	1.28735	up	17.4175	17.4896	14.9394	21.2187	20.3546	22.8319
ENST00000222374	ENSG00000105767	CADM4	2178	protein_coding	mRNA	0.00598386	0.367318	1.29827	up	2.23136	2.04019	2.46375	3.19488	3.037	3.47557
ENST00000222990	ENSG00000106266	SNX8	4727	protein_coding	mRNA	0.0247362	0.431946	1.41863	up	5.05004	6.92316	4.95831	7.6773	8.44294	8.63086
ENST00000223127	ENSG00000106397	PLOD3	2920	protein_coding	mRNA	0.00626021	0.367318	1.24813	up	39.8682	40.3081	44.4995	51.3931	50.6597	55.0623
ENST00000224337	ENSG00000095585	BLNK	1784	protein_coding	mRNA	0.0264603	0.448314	1.57433	up	0.261958	0	0.109725	0.95315	0.545918	0.82044
ENST00000228567	ENSG00000110975	SYT10	4461	protein_coding	mRNA	0.0448547	0.58336	1.92455	up	2.18722	2.01136	2.08423	4.43755	3.69715	7.25939
ENST00000228928	ENSG00000111331	OAS3	6719	protein_coding	mRNA	0.000582299	0.191679	9.57845	up	2.9848	2.56191	2.76177	37.8677	41.5701	27.4729
ENST00000229314	ENSG00000111711	GOLT1B	3227	protein_coding	mRNA	0.0147	0.367318	1.51621	up	4.89492	6.04819	0.64225	3.97283	4.98843	5.36662
ENST00000234198	ENSG00000115844	DLX2	2453	protein_coding	mRNA	0.00501636	0.367318	1.7824	up	1.24123	0.754055	1.41833	2.88845	2.55923	3.0456
ENST00000235090	ENSG00000116455	WDR77	2576	protein_coding	mRNA	0.00463499	0.367318	1.78714	up	9.947	9.69396	8.35661	19.6823	16.2555	16.1481
ENST00000236273	ENSG00000117614	SYF2	1345	protein_coding	mRNA	0.0415114	0.564317	1.57065	up	4.40684	2.63069	5.0034	6.22212	7.91115	6.5327
ENST00000236698	ENSG00000118007	STAG1	5951	protein_coding	mRNA	0.016219	0.367318	1.40245	up	0.146181	0.056945	0	0.646342	0.40024	0.432294
ENST00000237289	ENSG00000118503	TNFAIP3	4432	protein_coding	mRNA	0.0407514	0.55994	1.24568	up	0.564963	0.502777	0	0.613159	0.52281	0.729459
ENST00000238721	ENSG00000115129	TP53I3	1998	protein_coding	mRNA	0.0090175	0.367318	1.53778	up	0.535216	0.169504	0.850002	1.44827	1.3803	1.20176
ENST00000239666	ENSG00000120509	PDZD11	1043	protein_coding	mRNA	0.0211618	0.400633	1.69743	up	8.13018	7.64696	9.81111	16.1377	17.8889	12.3396
ENST00000239878	ENSG00000120686	UFM1	3138	protein_coding	mRNA	0.00035756	0.15301	4.4834	up	2.51971	1.66181	2.60111	13.6305	14.21	13.1415
ENST00000243056	ENSG00000123364	HOXC13	2423	protein_coding	mRNA	0.00920976	0.367318	1.61544	up	6.93786	8.41432	2.92999	10.2799	8.18795	9.48048
ENST00000243298	ENSG00000123570	RAB9B	3748	protein_coding	mRNA	0.00930666	0.367318	1.23608	up	0.634326	0.656146	0.013565	0.680154	0.673433	0.703928
ENST00000243346	ENSG00000123609	NMI	1623	protein_coding	mRNA	0.00233693	0.362924	2.41912	up	1.91134	1.99243	1.9255	7.20983	5.26856	6.00544
ENST00000245407	ENSG00000197375	SLC22A5	3237	protein_coding	mRNA	0.026954	0.451444	2.29433	up	0.904585	1.10146	8.87936	6.12636	8.2688	8.30229
ENST00000245857	ENSG00000125691	RPL23	588	protein_coding	mRNA	0.0384538	0.544239	3.83536	up	0	0	2.90313	4.96001	2.98508	10.5244
ENST00000245907	ENSG00000125730	C3	5263	protein_coding	mRNA	0.030866	0.487678	1.93987	up	0.81857	0.84194	0.922728	2.32462	1.95055	3.82374
ENST00000247026	ENSG00000126653	NSRP1	2541	protein_coding	mRNA	0.0154267	0.367318	2.48862	up	0.842686	0	0.929395	3.38515	2.71318	2.63038
ENST00000247191	ENSG00000126787	DLGAP5	2973	protein_coding	mRNA	0.0449107	0.583551	1.23439	up	9.95444	12.2337	9.38302	12.2434	12.8608	13.9667
ENST00000247930	ENSG00000196453	ZNF777	3233	protein_coding	mRNA	0.0242378	0.426646	1.41518	up	4.45032	4.81729	7.83927	9.45952	7.62496	8.45804
ENST00000248248	ENSG00000103111	MON1B	6091	protein_coding	mRNA	0.0257198	0.441069	1.38223	up	5.32944	5.19863	10.2743	11.3106	8.8567	9.60083
ENST00000249075	ENSG00000128342	LIF	3969	protein_coding	mRNA	0.00164934	0.32287	1.29668	up	0.578165	0.593609	0.564726	1.0448	0.974476	1.11976
ENST00000249363	ENSG00000128594	LRRC4	3828	protein_coding	mRNA	0.00357464	0.367318	1.2253	up	0.960079	1.13144	0.417071	1.18629	1.09264	1.23884
ENST00000249700	ENSG00000128872	TMOD2	9191	protein_coding	mRNA	0.0220361	0.407995	1.20946	up	1.43718	1.66785	1.42409	2.07096	1.85033	2.15181
ENST00000250263	ENSG00000104626	ERI1	4615	protein_coding	mRNA	0.00149271	0.308373	2.17747	up	3.12711	2.91018	1.67969	7.03524	6.20731	6.2402
ENST00000251775	ENSG00000114520	SNX4	2513	protein_coding	mRNA	0.00428459	0.367318	1.3854	up	10.9788	11.7675	14.3894	18.137	17.6752	17.1096
ENST00000251809	ENSG00000104450	SPAG1	3748	protein_coding	mRNA	0.0157993	0.367318	2.30642	up	4.02273	4.76371	0	6.86058	4.61018	5.13207
ENST00000251822	ENSG00000008853	RHOBTB2	5451	protein_coding	mRNA	0.00115895	0.267563	1.67705	up	2.92194	2.77472	3.01686	6.05751	5.34002	5.32404
ENST00000252593	ENSG00000130303	BST2	1019	protein_coding	mRNA	7.69271e-05	0.0895009	6.00874	up	8.75791	8.47367	9.04355	56.9181	53.3189	63.5162
ENST00000252996	ENSG00000130699	TAF4	4628	protein_coding	mRNA	0.0129351	0.367318	1.3327	up	13.1044	10.171	16.1181	17.6165	18.2716	17.8309
ENST00000253110	ENSG00000130813	C19orf66	2117	protein_coding	mRNA	0.0267535	0.4503	2.47429	up	1.0669	0.434269	0.802282	4.71757	3.47675	2.22946
ENST00000253363	ENSG00000131051	RBM39	2488	protein_coding	mRNA	0.0427635	0.57121	1.53381	up	10.4839	8.25542	11.2598	13.0863	16.9018	18.2579
ENST00000254193	ENSG00000131876	SNRPA1	1055	protein_coding	mRNA	0.0467375	0.592985	1.24218	up	73.8459	73.0286	73.2719	81.9993	93.0483	99.9279
ENST00000254584	ENSG00000132254	ARFIP2	2543	protein_coding	mRNA	0.00703334	0.367318	1.99785	up	4.84014	5.72225	0.477579	5.73403	5.53856	7.28716
ENST00000254624	ENSG00000132294	EFR3A	5438	protein_coding	mRNA	0.00947967	0.367318	1.40392	up	9.23204	9.43027	15.6253	17.3731	16.715	15.2842
ENST00000254816	ENSG00000132481	TRIM47	2266	protein_coding	mRNA	0.0201643	0.388653	1.49543	up	1.30933	1.05213	1.93201	2.97987	2.13268	2.9265
ENST00000254853	ENSG00000132517	SLC52A1	2377	protein_coding	mRNA	0.0307249	0.486536	1.42801	up	0.20051	0	0	0.453804	0.686271	0.41237
ENST00000256216	ENSG00000133835	HSD17B4	2683	protein_coding	mRNA	0.0322081	0.498215	1.83884	up	30.8203	28.8154	5.47045	31.9751	27.7509	30.4055
ENST00000256433	ENSG00000134049	IER3IP1	3525	protein_coding	mRNA	0.0316808	0.494269	1.46123	up	1.79456	1.13384	1.2729	2.28978	2.60197	2.5539
ENST00000256497	ENSG00000134109	EDEM1	6146	protein_coding	mRNA	0.002595	0.367318	1.53071	up	6.93361	6.66051	9.56718	11.5607	12.7973	12.9619
ENST00000257570	ENSG00000135114	OASL	3266	protein_coding	mRNA	0.000618212	0.197591	1.91514	up	0.159725	0.228134	0.250278	1.46357	1.31571	1.20669
ENST00000257966	ENSG00000135506	OS9	2505	protein_coding	mRNA	0.0378069	0.539803	1.25647	up	6.82582	6.84761	6.89137	7.86793	9.66686	9.16247
ENST00000258198	ENSG00000135720	DYNC1LI2	4515	protein_coding	mRNA	0.0496026	0.611054	1.54077	up	7.64228	10.3603	8.86921	11.7246	15.7319	15.4719
ENST00000258382	ENSG00000135899	SP110	2080	protein_coding	mRNA	0.00494609	0.367318	3.03193	up	4.61114	2.62633	4.52218	15.0073	11.9619	14.8058
ENST00000258418	ENSG00000135932	CAB39	3826	protein_coding	mRNA	0.0140304	0.367318	1.53353	up	10.8314	12.1531	4.68866	14.1496	11.5027	13.8196
ENST00000258436	ENSG00000135953	MFSD9	4049	protein_coding	mRNA	0.0377359	0.539175	1.84348	up	0.82364	1.63194	0.704233	1.84162	3.1484	3.11945
ENST00000258742	ENSG00000136243	NUPL2	1795	protein_coding	mRNA	0.0157298	0.367318	1.46143	up	1.30102	0.98148	1.19788	2.51275	2.03695	1.96198
ENST00000259667	ENSG00000137133	HINT2	628	protein_coding	mRNA	0.0331751	0.506246	1.80954	up	11.3343	12.5528	2.75307	14.7708	15.697	10.5512
ENST00000259939	ENSG00000137393	RNF144B	5036	protein_coding	mRNA	0.00398759	0.367318	1.35616	up	0.81776	0.898999	0.347667	1.34029	1.13489	1.20381
ENST00000259951	ENSG00000204642	HLA-F	1635	protein_coding	mRNA	0.0356847	0.52534	1.86531	up	0	0	0	0.464025	0.813588	1.43786
ENST00000260302	ENSG00000137745	MMP13	2716	protein_coding	mRNA	0.0236189	0.421713	1.89785	up	0.303598	0.394526	0.348779	1.22343	2.30313	1.27492
ENST00000260372	ENSG00000137814	HAUS2	3949	protein_coding	mRNA	0.0242209	0.426473	1.65644	up	3.27781	3.02746	0.738883	3.45487	3.66004	4.70625
ENST00000261245	ENSG00000020426	MNAT1	2635	protein_coding	mRNA	0.00411498	0.367318	1.41071	up	6.11937	7.74204	2.81015	6.83425	8.08515	7.26489
ENST00000261413	ENSG00000113048	MRPS27	2785	protein_coding	mRNA	0.000421423	0.163944	1.41623	up	7.4181	6.64785	12.472	12.8452	12.6607	13.1974
ENST00000261622	ENSG00000103257	SLC7A5	4537	protein_coding	mRNA	0.00641638	0.367318	1.22298	up	149.214	151.168	191.517	197.245	203.748	205.038
ENST00000261890	ENSG00000103769	RAB11A	4930	protein_coding	mRNA	0.0247489	0.431961	1.70454	up	12.602	11.0995	3.53928	12.6707	14.7971	13.5367
ENST00000261947	ENSG00000113269	RNF130	1766	protein_coding	mRNA	0.00802489	0.367318	2.37392	up	0.121644	0.268199	0.367582	2.00959	1.45528	2.58691
ENST00000262352	ENSG00000106688	SLC1A1	3722	protein_coding	mRNA	0.0175006	0.367318	1.4661	up	0.48001	0.549511	0.504958	0.940053	1.28857	1.4404
ENST00000262643	ENSG00000105173	CCNE1	2043	protein_coding	mRNA	0.0048909	0.367318	1.38484	up	2.8293	2.86774	3.02163	4.40502	4.78714	4.09187
ENST00000262879	ENSG00000170471	RALGAPB	8663	protein_coding	mRNA	0.0105727	0.367318	1.45585	up	3.86323	3.91872	3.49274	5.18617	6.00236	6.54044
ENST00000263102	ENSG00000108091	CCDC6	5811	protein_coding	mRNA	0.000127588	0.0986298	3.27147	up	6.86528	7.45723	7.48861	27.6863	24.641	26.009
ENST00000263268	ENSG00000118242	MREG	1314	protein_coding	mRNA	0.0244874	0.42974	1.69672	up	21.8372	22.1726	6.86602	28.5084	23.3615	22.8256
ENST00000263270	ENSG00000042753	AP2S1	935	protein_coding	mRNA	0.0178084	0.367318	1.24422	up	35.8351	32.2372	37.6197	45.5083	46.1441	41.3431
ENST00000263549	ENSG00000059378	PARP12	3796	protein_coding	mRNA	0.00197535	0.339537	4.41565	up	0.830301	0.678394	1.05771	8.43926	5.4183	8.25272
ENST00000263642	ENSG00000115267	IFIH1	3595	protein_coding	mRNA	0.0133693	0.367318	2.91312	up	2.87661	4.42009	4.07639	16.6999	12.9604	9.77
ENST00000263734	ENSG00000116016	EPAS1	5166	protein_coding	mRNA	0.0365116	0.53041	1.88438	up	1.85276	1.32559	2.55858	4.52729	3.26698	6.09646
ENST00000263773	ENSG00000109920	FNBP4	3972	protein_coding	mRNA	0.000787032	0.224318	1.26275	up	10.5841	10.8559	9.82382	13.6852	13.3416	13.0252
ENST00000264033	ENSG00000110395	CBL	11231	protein_coding	mRNA	0.0426307	0.570509	1.25877	up	11.8956	12.3758	5.17893	12.0461	11.3124	10.7172
ENST00000264110	ENSG00000115966	ATF2	4176	protein_coding	mRNA	0.0322883	0.499133	1.35074	up	4.93984	7.67122	2.16618	5.25864	6.52831	6.38603
ENST00000264198	ENSG00000090432	MUL1	2438	protein_coding	mRNA	0.0201273	0.38833	2.03363	up	1.10627	1.56777	5.17872	6.89058	5.37756	5.50612
ENST00000264249	ENSG00000115526	CHST10	2842	protein_coding	mRNA	0.0245019	0.429866	1.48447	up	0.934146	1.14221	2.62753	3.11355	2.47169	2.76986
ENST00000264255	ENSG00000115514	TXNDC9	1637	protein_coding	mRNA	0.0201038	0.38827	1.67701	up	7.56276	7.90783	7.18921	10.701	14.8363	14.6841
ENST00000264266	ENSG00000118855	MFSD1	1594	protein_coding	mRNA	0.0111019	0.367318	2.05995	up	4.03415	4.34774	10.6822	16.6369	12.6475	12.0159
ENST00000264274	ENSG00000064012	CASP8	2540	protein_coding	mRNA	0.0312736	0.490856	1.46724	up	0	0	0	0.245991	0.513403	0.672165
ENST00000264276	ENSG00000003393	ALS2	6644	protein_coding	mRNA	0.0133179	0.367318	1.28251	up	2.79816	3.10289	1.91948	3.7585	3.57261	3.19499
ENST00000264346	ENSG00000138642	HERC6	3779	protein_coding	mRNA	0.002589	0.367318	2.50739	up	0.963126	0.989207	1.21831	5.15229	3.77897	3.73832
ENST00000264350	ENSG00000138646	HERC5	3513	protein_coding	mRNA	0.0475366	0.598276	1.24837	up	0.828028	0.71044	0.721119	1.30018	1.32006	0.95841
ENST00000264554	ENSG00000129946	SHC2	2494	protein_coding	mRNA	0.0171735	0.367318	1.30317	up	0.59887	0.721342	0.804515	1.103	1.20172	1.39929
ENST00000264595	ENSG00000038002	AGA	2107	protein_coding	mRNA	0.0120264	0.367318	1.24303	up	2.0578	2.12906	2.93352	3.36533	3.30637	2.99554
ENST00000264771	ENSG00000127419	TMEM175	1860	protein_coding	mRNA	0.0149731	0.367318	1.40434	up	1.09532	1.34179	0.728391	2.04274	1.54324	1.9091
ENST00000264990	ENSG00000240303	ACAD11	4142	protein_coding	mRNA	0.0354291	0.522927	1.24862	up	2.12422	2.99186	1.38584	2.85902	2.91457	2.57497
ENST00000265806	ENSG00000104679	R3HCC1	1773	protein_coding	mRNA	0.00157152	0.317559	1.49488	up	3.93537	3.7858	3.89369	6.71391	5.95271	6.21821
ENST00000266022	ENSG00000004534	RBM6	3750	protein_coding	mRNA	0.00187776	0.333658	1.78761	up	2.53351	1.72328	5.48373	6.73578	6.77389	5.72763
ENST00000267430	ENSG00000187790	FANCM	7111	protein_coding	mRNA	0.03981	0.553368	1.30159	up	2.23645	2.10761	1.65189	3.28913	2.50363	2.81133
ENST00000268058	ENSG00000140464	PML	4508	protein_coding	mRNA	0.00569283	0.367318	1.63152	up	0.28013	0.441043	0.279813	1.38709	1.01821	1.10272
ENST00000268483	ENSG00000140830	TXNL4B	2556	protein_coding	mRNA	0.00309561	0.367318	2.08556	up	2.42257	2.67223	2.39704	7.33976	5.66295	5.91761
ENST00000269499	ENSG00000141664	ZCCHC2	5959	protein_coding	mRNA	0.0190463	0.378464	1.25353	up	3.6346	4.26701	4.13061	5.12825	5.22558	5.47903
ENST00000270162	ENSG00000142178	SIK1	4712	protein_coding	mRNA	0.0120705	0.367318	1.21866	up	2.731	2.89527	3.10448	3.92992	3.88514	3.53224
ENST00000270301	ENSG00000075702	WDR62	4632	protein_coding	mRNA	0.0158644	0.367318	1.58007	up	1.30842	0.747977	1.04035	2.09835	2.2058	2.30382
ENST00000270812	ENSG00000142684	ZNF593	1885	protein_coding	mRNA	0.0137144	0.367318	1.31705	up	0.063802	0.000116	0.029924	0.460392	0.361853	0.261706
ENST00000273158	ENSG00000144659	SLC25A38	2123	protein_coding	mRNA	0.0394823	0.550986	1.31351	up	8.97301	9.23778	16.5695	17.0586	15.5401	13.8801
ENST00000273359	ENSG00000144827	ABHD10	2590	protein_coding	mRNA	0.000805519	0.2271	2.20967	up	2.31505	2.07951	2.28916	6.56689	6.39127	5.52625
ENST00000273814	ENSG00000145214	DGKQ	4636	protein_coding	mRNA	0.0389175	0.546863	1.26705	up	3.84046	3.12191	3.00179	4.37457	4.68558	4.2463
ENST00000274276	ENSG00000145623	OSMR	5539	protein_coding	mRNA	0.0265855	0.448532	1.49768	up	3.95591	5.19104	5.22222	7.93114	6.88192	8.22396
ENST00000274695	ENSG00000145996	CDKAL1	3272	protein_coding	mRNA	0.0321668	0.497962	1.28589	up	2.5715	2.96191	2.03169	3.82716	3.51883	3.03032
ENST00000275053	ENSG00000146263	MMS22L	8643	protein_coding	mRNA	0.0135825	0.367318	1.61381	up	2.86221	2.8637	0.299384	2.87986	3.03762	3.36361
ENST00000275521	ENSG00000146674	IGFBP3	2262	protein_coding	mRNA	0.0113592	0.367318	1.58043	up	1.06689	0.689723	0.658614	1.66722	1.89854	1.91713
ENST00000276914	ENSG00000147872	PLIN2	1972	protein_coding	mRNA	0.0362342	0.529057	1.80835	up	5.90954	4.83111	4.8067	7.53509	11.7537	11.5577
ENST00000277480	ENSG00000148346	LCN2	822	protein_coding	mRNA	0.0309225	0.487976	1.61729	up	4.58212	4.51097	4.13418	6.05262	8.21756	9.13195
ENST00000278742	ENSG00000149418	ST14	3539	protein_coding	mRNA	0.00552158	0.367318	1.24277	up	40.523	39.7108	33.622	47.87	45.1424	47.4968
ENST00000279873	ENSG00000150347	ARID5B	7891	protein_coding	mRNA	0.000664015	0.207735	1.61884	up	5.37086	7.14802	2.04775	7.20788	7.02451	7.80767
ENST00000282003	ENSG00000152193	RNF219	3529	protein_coding	mRNA	0.000338537	0.150235	1.78693	up	1.25603	1.03343	1.57615	3.23821	2.93536	3.17875
ENST00000282058	ENSG00000152240	HAUS1	1125	protein_coding	mRNA	0.0192227	0.380014	1.64911	up	4.82241	5.31985	8.25913	10.1744	12.6726	9.67476
ENST00000282308	ENSG00000152454	ZNF256	2172	protein_coding	mRNA	0.0170367	0.367318	1.80624	up	0.130347	0.434745	1.01842	1.76691	1.91451	1.55822
ENST00000282869	ENSG00000152926	ZNF117	9080	protein_coding	mRNA	0.0113578	0.367318	1.53236	up	0.678175	1.0095	0.668709	1.44886	1.79834	1.89113
ENST00000283303	ENSG00000153294	ADGRF4	3162	protein_coding	mRNA	0.0196267	0.38354	1.41731	up	0.505722	0.589961	0.609566	1.04114	1.14482	1.51535
ENST00000283415	ENSG00000153395	LPCAT1	3966	protein_coding	mRNA	0.00508192	0.367318	1.71195	up	35.7902	40.7281	40.5142	74.5215	63.5144	65.0636
ENST00000284376	ENSG00000154222	CC2D1B	3377	protein_coding	mRNA	0.0223579	0.410394	1.29819	up	3.69947	4.87331	3.16276	5.05871	5.08428	5.5236
ENST00000284881	ENSG00000154642	C21orf91	5433	protein_coding	mRNA	0.0290695	0.471415	1.46855	up	2.205	2.07073	0.739479	3.11445	2.42373	2.50933
ENST00000285605	ENSG00000155254	MARVELD1	3221	protein_coding	mRNA	0.0149347	0.367318	1.85158	up	3.9644	3.60264	7.22609	11.1553	11.2051	7.80685
ENST00000285697	ENSG00000155330	C16orf87	1585	protein_coding	mRNA	0.0399764	0.554538	1.29589	up	1.63882	2.26084	1.09532	2.45746	2.01021	2.55025
ENST00000286307	ENSG00000155858	LSM11	6584	protein_coding	mRNA	0.026889	0.450928	1.49508	up	4.02178	4.17005	0.557202	3.80609	4.15299	3.5051
ENST00000287156	ENSG00000156587	UBE2L6	1354	protein_coding	mRNA	0.0474387	0.597782	6.22763	up	2.65458	4.86332	2.3948	16.9318	13.0748	64.021
ENST00000287996	ENSG00000127080	IPPK	4401	protein_coding	mRNA	0.0147389	0.367318	1.45588	up	3.24978	3.08829	3.41901	5.70064	4.4699	5.53717
ENST00000288022	ENSG00000258429	PDF	1158	protein_coding	mRNA	0.0485294	0.604009	1.89399	up	11.1646	18.5498	0.934046	15.5645	8.97451	12.3882
ENST00000288599	ENSG00000084676	NCOA1	6952	protein_coding	mRNA	0.0228943	0.415396	1.72876	up	0	0	0.095694	0.481029	1.15491	0.79668
ENST00000288840	ENSG00000137834	SMAD6	3835	protein_coding	mRNA	0.00210062	0.347551	1.50757	up	2.97421	3.87322	1.36321	3.85545	4.56441	4.21696
ENST00000289382	ENSG00000158435	CNOT11	2599	protein_coding	mRNA	0.00282874	0.367318	1.52102	up	16.8662	14.8559	15.3273	24.1273	25.1989	23.6888
ENST00000290037	ENSG00000148396	SEC16A	8982	protein_coding	mRNA	0.0355938	0.524581	1.45942	up	10.7758	10.184	16.0639	22.2335	15.847	18.0848
ENST00000290573	ENSG00000159399	HK2	5772	protein_coding	mRNA	0.0441683	0.579492	1.62042	up	15.7867	12.7495	19.7187	22.1237	33.4383	25.9678
ENST00000291568	ENSG00000160213	CSTB	2163	protein_coding	mRNA	0.0171106	0.367318	1.25156	up	27.1698	26.4109	28.2309	34.3077	32.1858	37.0989
ENST00000291705	ENSG00000160310	PRMT2	1702	protein_coding	mRNA	0.0130265	0.367318	1.83566	up	0.190444	0	3.52781	2.18148	2.31022	2.99626
ENST00000292246	ENSG00000160746	ANO10	3212	protein_coding	mRNA	0.0276197	0.457984	1.49054	up	4.68206	7.6187	2.65576	6.91574	7.81525	6.55933
ENST00000292363	ENSG00000070423	RNF126	1694	protein_coding	mRNA	0.0245354	0.43022	1.69097	up	7.59659	11.3269	10.0147	16.7188	17.373	16.3397
ENST00000292393	ENSG00000166526	ZNF3	512	protein_coding	mRNA	0.0215016	0.404382	1.6401	up	0.784669	0.563208	0	1.25364	1.01271	1.50814
ENST00000293288	ENSG00000087088	BAX	1358	protein_coding	mRNA	0.0172399	0.367318	1.40943	up	3.91592	3.1301	3.89449	5.96595	5.01649	5.76592
ENST00000294008	ENSG00000188827	SLX4	7307	protein_coding	mRNA	0.0262605	0.446318	1.24714	up	3.48999	3.32116	3.15642	4.84998	4.06656	4.23909
ENST00000294129	ENSG00000213672	NCKIPSD	2989	protein_coding	mRNA	0.00302961	0.367318	1.3753	up	3.60484	3.89067	3.39297	4.96129	5.5377	5.50632
ENST00000295148	ENSG00000163026	C2orf44	3817	protein_coding	mRNA	0.00681794	0.367318	1.56215	up	1.39637	1.52807	2.26081	3.65421	2.92874	3.30568
ENST00000295488	ENSG00000163312	HELQ	3579	protein_coding	mRNA	0.0477813	0.599525	1.32328	up	1.47278	1.70022	0.432273	1.31363	1.88636	2.005
ENST00000295868	ENSG00000206530	CFAP44	3377	protein_coding	mRNA	0.014591	0.367318	1.70726	up	0.08252	0.100113	1.24538	1.9005	1.23327	1.3097
ENST00000295901	ENSG00000163636	PSMD6	1430	protein_coding	mRNA	0.0234621	0.420355	1.24657	up	250.362	260.883	327.428	339.577	339.682	373.956
ENST00000295902	ENSG00000163637	PRICKLE2	8305	protein_coding	mRNA	1.28734e-05	0.0453675	10.5444	up	0	0.016124	0.021002	10.3753	9.02931	9.68461
ENST00000296140	ENSG00000163823	CCR1	2731	protein_coding	mRNA	0.0403502	0.557129	1.24072	up	0.255502	0.223848	0.223653	0.532936	0.395237	0.676652
ENST00000296161	ENSG00000163840	DTX3L	5868	protein_coding	mRNA	0.0185756	0.373132	2.85425	up	2.23183	4.22893	4.97307	15.4431	10.2188	12.3467
ENST00000296677	ENSG00000164251	F2RL1	2914	protein_coding	mRNA	0.00099952	0.24788	4.34357	up	0.264789	0.344845	0.352015	5.28645	5.35959	3.73786
ENST00000297258	ENSG00000164687	FABP5	851	protein_coding	mRNA	0.00980402	0.367318	1.23466	up	6.26829	5.61702	6.04836	7.34282	7.84211	7.69253
ENST00000297469	ENSG00000164850	GPER1	2778	protein_coding	mRNA	0.00267008	0.367318	1.36186	up	1.8939	1.65435	2.31406	3.13718	2.83754	3.1794
ENST00000297533	ENSG00000164897	TMUB1	1353	protein_coding	mRNA	0.014694	0.367318	1.88896	up	6.09125	4.98865	6.46059	14.8286	11.4408	10.1616
ENST00000297679	ENSG00000099377	HSD3B7	2172	protein_coding	mRNA	0.00362688	0.367318	2.05857	up	3.27284	3.16649	7.9729	9.97534	10.0954	11.9203
ENST00000297991	ENSG00000165272	AQP3	1849	protein_coding	mRNA	0.0271767	0.453778	1.34625	up	8.32409	7.06278	9.54882	11.8151	10.3406	12.8006
ENST00000299821	ENSG00000025770	NCAPH2	1996	protein_coding	mRNA	3.50098e-05	0.0816628	1.79475	up	0.300869	0.202378	0.814959	1.64625	1.62237	1.51732
ENST00000299977	ENSG00000166750	SLFN5	10591	protein_coding	mRNA	0.00619076	0.367318	1.38639	up	1.58496	1.59954	0.587403	1.90626	1.87836	2.13888
ENST00000300035	ENSG00000166803	KIAA0101	2194	protein_coding	mRNA	0.0263355	0.447084	1.49022	up	9.97559	8.54317	13.3571	18.1124	13.7016	17.7952
ENST00000300093	ENSG00000166851	PLK1	2227	protein_coding	mRNA	0.00227967	0.360274	1.20693	up	49.8958	46.7778	53.816	59.834	62.3103	60.9947
ENST00000300952	ENSG00000167470	MIDN	3790	protein_coding	mRNA	0.0181491	0.368463	1.24683	up	17.5574	17.2972	25.3163	24.7232	24.3657	27.113
ENST00000301015	ENSG00000103335	PIEZO1	8072	protein_coding	mRNA	0.00907924	0.367318	1.22109	up	52.2366	52.6537	53.785	65.2707	61.5711	67.9682
ENST00000301391	ENSG00000167740	CYB5D2	1910	protein_coding	mRNA	0.0134859	0.367318	1.32587	up	1.80743	1.89614	1.97469	2.83642	2.55711	3.15494
ENST00000301522	ENSG00000167815	PRDX2	987	protein_coding	mRNA	0.0098583	0.367318	1.41328	up	98.8618	94.0563	168.06	157.514	178.446	173.14
ENST00000302506	ENSG00000164045	CDC25A	3783	protein_coding	mRNA	0.0261137	0.444705	1.37028	up	3.61935	4.4284	5.27923	6.81149	6.11573	6.52571
ENST00000303071	ENSG00000159147	DONSON	2170	protein_coding	mRNA	0.0194942	0.382415	1.34918	up	4.75464	5.33607	4.11189	7.28231	5.92372	6.75552
ENST00000303372	ENSG00000168778	TCTN2	2912	protein_coding	mRNA	0.0472136	0.59577	1.35008	up	1.51934	1.01101	1.21874	1.89993	2.32124	1.88348
ENST00000303746	ENSG00000131650	KREMEN2	2326	protein_coding	mRNA	0.047453	0.597782	1.65223	up	1.70278	1.01148	3.90037	3.37748	5.54638	3.75922
ENST00000303921	ENSG00000170775	GPR37	3021	protein_coding	mRNA	0.000284748	0.132242	1.44702	up	0.542681	0.777247	0	0.929501	1.03861	0.938925
ENST00000304191	ENSG00000169612	FAM103A1	1568	protein_coding	mRNA	0.000154382	0.103341	2.39903	up	7.27415	7.40538	7.70115	18.165	20.0865	19.7946
ENST00000304698	ENSG00000144369	FAM171B	5826	protein_coding	mRNA	0.00846934	0.367318	1.72828	up	1.94413	1.94072	5.27582	5.23758	6.26601	5.98445
ENST00000304800	ENSG00000168701	TMEM208	793	protein_coding	mRNA	0.0331824	0.506293	1.28403	up	10.3514	12.2926	9.84469	14.7267	12.7461	14.64
ENST00000304863	ENSG00000169021	UQCRFS1	3475	protein_coding	mRNA	0.011132	0.367318	9.14772	up	0.258019	3.7247	0.446295	18.0618	16.4897	16.4637
ENST00000305138	ENSG00000152942	RAD17	3164	protein_coding	mRNA	0.0170823	0.367318	1.2632	up	1.35809	1.56469	0.843017	1.8003	1.57368	1.96868
ENST00000305877	ENSG00000186716	BCR	7082	protein_coding	mRNA	0.0219879	0.407781	1.34783	up	9.55688	11.4807	12.3622	15.471	15.6473	15.0323
ENST00000305978	ENSG00000171222	SCAND1	902	protein_coding	mRNA	0.0296882	0.477225	1.46421	up	12.7157	12.1636	15.2561	17.0042	21.6724	22.2615
ENST00000306306	ENSG00000168476	REEP4	1710	protein_coding	mRNA	0.0321044	0.497426	1.36166	up	19.905	23.8986	17.6914	25.2615	31.384	26.8029
ENST00000306378	ENSG00000171634	BPTF	9688	protein_coding	mRNA	0.0258587	0.442411	1.78954	up	12.3518	11.5074	8.586	23.952	15.9178	19.793
ENST00000306390	ENSG00000171236	LRG1	3036	protein_coding	mRNA	0.0141854	0.367318	1.26994	up	0.64642	0.556576	0.878367	1.00726	1.24478	1.24701
ENST00000306480	ENSG00000170088	TMEM192	10012	protein_coding	mRNA	0.0456913	0.588049	1.74964	up	1.42802	1.2464	1.13382	1.95653	3.46444	3.65124
ENST00000307106	ENSG00000168273	SMIM4	274	protein_coding	mRNA	0.0136755	0.367318	3.2657	up	0	0	0	1.20707	2.85619	3.07545
ENST00000307259	ENSG00000067113	PLPP1	1597	protein_coding	mRNA	0.00601352	0.367318	1.53768	up	1.04749	1.39538	0.850392	1.96115	2.4473	2.12369
ENST00000307864	ENSG00000042286	AIFM2	3243	protein_coding	mRNA	0.0268416	0.450821	1.79	up	2.21394	2.53546	2.39765	5.18492	3.85689	6.35981
ENST00000307896	ENSG00000041988	THAP3	1046	protein_coding	mRNA	0.0272671	0.454654	1.62472	up	0.741666	0.16027	1.18523	1.65278	2.06255	1.5276
ENST00000308249	ENSG00000175175	PPM1E	6542	protein_coding	mRNA	0.0335703	0.508777	1.22441	up	2.43238	3.00416	2.29433	3.36018	3.09336	3.54837
ENST00000308659	ENSG00000153094	BCL2L11	1522	protein_coding	mRNA	0.0176686	0.367318	1.45445	up	0.448866	0.239264	0.198602	0.923585	0.979713	0.716443
ENST00000308677	ENSG00000072062	PRKACA	2677	protein_coding	mRNA	0.0110026	0.367318	1.3673	up	23.3282	21.233	33.5735	33.2515	38.6237	36.6102
ENST00000308807	ENSG00000168404	MLKL	2523	protein_coding	mRNA	0.00105241	0.2563	1.76759	up	3.39161	3.25695	4.05585	7.80818	6.72164	6.88406
ENST00000308831	ENSG00000173156	RHOD	1129	protein_coding	mRNA	0.0434342	0.575572	1.40651	up	37.6497	36.1643	14.6715	38.7417	33.8325	38.3186
ENST00000309318	ENSG00000173457	PPP1R14B	982	protein_coding	mRNA	0.0162074	0.367318	1.96869	up	130.199	127.255	26.542	140.721	144.072	133.168
ENST00000309534	ENSG00000163320	CGGBP1	4495	protein_coding	mRNA	0.0355801	0.524447	1.77055	up	18.4556	18.1306	2.95087	18.6864	15.4203	18.5867
ENST00000309546	ENSG00000203896	LIME1	1178	protein_coding	mRNA	0.0474554	0.597782	1.4065	up	0.146404	0.095154	0.044538	0.285639	0.626729	0.72425
ENST00000309880	ENSG00000173825	TIGD3	2012	protein_coding	mRNA	0.043369	0.575242	1.32172	up	1.5084	1.33374	0.704279	1.95267	1.94094	1.51446
ENST00000310682	ENSG00000103037	SETD6	2042	protein_coding	mRNA	0.0287062	0.468734	1.42096	up	0.195555	0.140184	0.056365	0.375244	0.689139	0.749849
ENST00000311083	ENSG00000175183	CSRP2	943	protein_coding	mRNA	0.0196511	0.38386	1.21665	up	1.41659	1.23798	1.7647	1.93485	1.91557	2.24186
ENST00000311337	ENSG00000113552	GNPDA1	2273	protein_coding	mRNA	0.0218571	0.406972	1.47031	up	6.22095	5.7549	2.85319	7.782	6.68873	7.06218
ENST00000311916	ENSG00000107815	C10orf2	3131	protein_coding	mRNA	0.042186	0.568266	1.31313	up	1.0219	1.44842	0.897859	1.57436	1.61325	2.06271
ENST00000312053	ENSG00000174837	ADGRE1	3128	protein_coding	mRNA	0.00479402	0.367318	1.23087	up	0.082445	0.103693	0.135223	0.415779	0.309634	0.37207
ENST00000312629	ENSG00000175634	RPS6KB2	1733	protein_coding	mRNA	0.0233689	0.419899	1.21015	up	28.2579	27.8286	26.7943	34.3096	31.1209	35.3958
ENST00000312637	ENSG00000174132	FAM174A	1356	protein_coding	mRNA	0.00382289	0.367318	1.42883	up	3.92745	4.20305	4.14376	6.19878	6.74953	5.90159
ENST00000313028	ENSG00000178685	PARP10	3497	protein_coding	mRNA	0.000375293	0.155824	7.59931	up	0	0	0.015579	7.62834	5.30547	7.22157
ENST00000313269	ENSG00000178719	GRINA	1968	protein_coding	mRNA	0.0352657	0.521736	1.24504	up	28.5767	25.1628	25.2975	33.2775	30.8239	34.8103
ENST00000313608	ENSG00000181610	MRPS23	5621	protein_coding	mRNA	0.000972093	0.244825	1.98275	up	5.03391	5.08873	6.91755	13.5077	12.022	11.5364
ENST00000314128	ENSG00000170581	STAT2	3259	protein_coding	mRNA	0.00932284	0.367318	1.97278	up	4.02292	5.12378	6.04239	11.0629	9.65251	12.3705
ENST00000314423	ENSG00000141076	UTP4	2322	protein_coding	mRNA	0.0166627	0.367318	1.62893	up	16.0053	21.7326	8.97225	27.1152	21.2573	22.702
ENST00000316356	ENSG00000137501	SYTL2	4293	protein_coding	mRNA	0.0128639	0.367318	1.38238	up	25.9002	28.9272	28.4356	41.9914	36.3883	38.0845
ENST00000316924	ENSG00000174996	KLC2	2990	protein_coding	mRNA	0.029055	0.471415	1.55444	up	6.84679	7.94009	1.36288	5.60353	7.25557	8.2631
ENST00000317058	ENSG00000176476	SGF29	1153	protein_coding	mRNA	0.0427767	0.571215	1.25723	up	9.40233	11.0274	10.613	12.7025	12.7095	14.3895
ENST00000317257	ENSG00000136169	SETDB2	5619	protein_coding	mRNA	0.0429963	0.572361	1.36117	up	0.431542	0.400358	0.610254	1.02374	1.32358	0.768841
ENST00000317459	ENSG00000149743	TRPT1	962	protein_coding	mRNA	0.0120871	0.367318	1.58997	up	5.06811	5.73345	4.68861	8.6679	9.97763	7.61364
ENST00000318217	ENSG00000176658	MYO1D	5563	protein_coding	mRNA	0.0291281	0.471704	1.21143	up	11.3606	13.7706	8.46628	12.2284	14.0442	13.4939
ENST00000318596	ENSG00000181035	SLC25A42	3120	protein_coding	mRNA	0.0343138	0.514192	1.43854	up	1.69329	0.912243	2.57481	2.78659	3.32387	2.63708
ENST00000319715	ENSG00000122257	RBBP6	6229	protein_coding	mRNA	0.013626	0.367318	1.36513	up	3.42424	3.41025	2.35118	3.98355	4.37428	4.93628
ENST00000320031	ENSG00000005884	ITGA3	4888	protein_coding	mRNA	0.047808	0.599765	1.44457	up	8.32175	11.3483	11.8816	14.5858	15.9233	16.2961
ENST00000320602	ENSG00000099904	ZDHHC8	3072	protein_coding	mRNA	0.0478595	0.599971	1.41628	up	0	0	0.105449	0.3434	0.342228	0.767975
ENST00000321337	ENSG00000161956	SENP3	2611	protein_coding	mRNA	0.00856528	0.367318	1.64049	up	14.5147	16.2491	5.85964	20.1795	17.1817	17.2633
ENST00000321949	ENSG00000105662	CRTC1	2501	protein_coding	mRNA	0.00806188	0.367318	1.33318	up	3.43307	3.59903	2.29643	4.33716	4.67496	3.99351
ENST00000322048	ENSG00000067836	ROGDI	1735	protein_coding	mRNA	0.00360648	0.367318	1.87712	up	3.78795	3.48315	7.03637	8.86359	9.60177	10.9327
ENST00000322611	ENSG00000176788	BASP1	1878	protein_coding	mRNA	0.0382954	0.54341	10.4603	up	2.85182	2.19233	2.39971	70.1708	56.8074	10.7274
ENST00000322764	ENSG00000159840	ZYX	2493	protein_coding	mRNA	0.0318599	0.495769	1.27264	up	23.8442	20.4081	22.4502	27.4012	27.6761	30.7747
ENST00000323578	ENSG00000177830	CHID1	3374	protein_coding	mRNA	0.0191249	0.378875	2.08589	up	7.30288	8.2153	0.485886	6.23095	8.65528	10.0509
ENST00000323786	ENSG00000103051	COG4	2833	protein_coding	mRNA	0.00560977	0.367318	1.45777	up	19.5543	22.162	7.23011	21.1746	21.3327	19.885
ENST00000323854	ENSG00000173818	ENDOV	1226	protein_coding	mRNA	0.0146146	0.367318	1.42291	up	1.3311	1.5296	1.39142	2.79056	2.13187	2.40884
ENST00000324076	ENSG00000213928	IRF9	658	protein_coding	mRNA	0.0352945	0.521969	4.09404	up	0.160033	0.163586	0.237224	3.78565	1.76464	7.74182
ENST00000324379	ENSG00000084072	PPIE	1277	protein_coding	mRNA	0.0108545	0.367318	1.47225	up	11.4799	12.6858	4.24875	12.3314	11.5429	13.7307
ENST00000325110	ENSG00000112972	HMGCS1	3506	protein_coding	mRNA	0.0118664	0.367318	1.58882	up	8.54627	7.292	5.14266	10.5757	12.0761	11.1825
ENST00000326134	ENSG00000179832	MROH1	5183	protein_coding	mRNA	0.0361294	0.52864	1.72787	up	1.87738	1.74526	0.000248	1.78438	2.08284	3.02001
ENST00000326172	ENSG00000144802	NFKBIZ	3923	protein_coding	mRNA	0.0132471	0.367318	1.70252	up	3.75794	3.89853	3.93476	6.2775	7.00446	8.7553
ENST00000327428	ENSG00000163170	BOLA3	639	protein_coding	mRNA	0.00933771	0.367318	1.22359	up	18.1964	19.1984	23.003	24.8612	24.8244	25.3135
ENST00000327979	ENSG00000042062	FAM65C	4377	protein_coding	mRNA	0.0429511	0.572204	1.52564	up	0.409688	0.588011	1.11176	2.15375	1.40828	1.33262
ENST00000328666	ENSG00000187531	SIRT7	1743	protein_coding	mRNA	0.0284767	0.467054	1.64012	up	4.15397	6.28481	4.4597	9.57083	7.67409	8.5929
ENST00000329214	ENSG00000185298	CCDC137	2468	protein_coding	mRNA	0.0363501	0.52964	1.24556	up	9.4753	11.5909	6.7982	12.1311	11.4116	10.4053
ENST00000329492	ENSG00000008735	MAPK8IP2	3381	protein_coding	mRNA	0.00492149	0.367318	1.60061	up	2.34719	2.72237	2.40316	4.52875	4.14864	5.05256
ENST00000329608	ENSG00000184371	CSF1	4210	protein_coding	mRNA	0.0322395	0.498572	1.45877	up	0.105949	0.024462	0.05475	0.729119	0.633622	0.315999
ENST00000330243	ENSG00000185507	IRF7	1992	protein_coding	mRNA	0.0016664	0.32287	2.74735	up	1.59587	1.42286	1.32879	6.52505	5.88474	4.81246
ENST00000330394	ENSG00000182580	EPHB3	4236	protein_coding	mRNA	0.00191669	0.336248	1.26407	up	3.90297	4.18846	3.65414	5.23141	4.9859	5.3187
ENST00000330651	ENSG00000185386	MAPK11	2431	protein_coding	mRNA	0.0127671	0.367318	1.4368	up	0.755778	1.02739	1.37277	2.0146	2.00151	1.86117
ENST00000330714	ENSG00000183486	MX2	3042	protein_coding	mRNA	0.0042735	0.367318	1.37229	up	0	0	0	0.441341	0.397821	0.283397
ENST00000330899	ENSG00000086061	DNAJA1	2381	protein_coding	mRNA	0.0311772	0.490139	1.45359	up	33.8748	32.1495	28.0422	53.0208	40.409	44.0799
ENST00000331075	ENSG00000185133	INPP5J	3347	protein_coding	mRNA	0.0486566	0.604963	1.34915	up	1.9306	1.06644	2.30015	2.87498	2.59725	2.73068
ENST00000331569	ENSG00000183779	ZNF703	3349	protein_coding	mRNA	0.00241192	0.367212	6.46371	up	2.53835	1.85102	76.5272	69.567	67.6492	72.3361
ENST00000332180	ENSG00000136051	KIAA1033	5812	protein_coding	mRNA	0.00120742	0.274486	1.38221	up	6.04864	6.27738	7.57821	9.49559	9.72117	9.6191
ENST00000332303	ENSG00000185115	NSMCE3	1681	protein_coding	mRNA	0.000158046	0.104625	7.42873	up	0	0	0	7.07044	6.89914	5.43705
ENST00000332780	ENSG00000185909	KLHDC8B	1959	protein_coding	mRNA	0.0164262	0.367318	1.41887	up	2.3652	1.92225	1.95094	3.74344	3.18537	3.15569
ENST00000333610	ENSG00000183891	TTC32	822	protein_coding	mRNA	0.0432515	0.574481	1.51215	up	0.474375	0.192181	0.317385	0.845941	1.38237	0.828917
ENST00000333625	ENSG00000182393	IFNL1	857	protein_coding	mRNA	0.0098082	0.367318	1.20238	up	0.055134	0.063378	0	0.290523	0.182666	0.266232
ENST00000334379	ENSG00000066651	TRMT11	1949	protein_coding	mRNA	0.0078349	0.367318	1.23645	up	2.96486	2.98176	3.23278	4.15006	3.75763	4.20836
ENST00000334482	ENSG00000167815	PRDX2	784	protein_coding	mRNA	0.0220376	0.407995	1.95371	up	1.49302	1.56221	3.14875	3.97652	4.73069	6.48299
ENST00000334651	ENSG00000169084	DHRSX	2571	protein_coding	mRNA	0.00120453	0.274385	1.37044	up	2.89099	2.96436	3.1086	4.54846	4.2566	4.63089
ENST00000334660	ENSG00000187446	CHP1	3329	protein_coding	mRNA	0.0395153	0.551192	1.50073	up	30.1786	31.5344	7.06765	29.1612	25.4159	26.8232
ENST00000334746	ENSG00000011114	BTBD7	8430	protein_coding	mRNA	0.0265171	0.448532	1.63946	up	4.55386	3.78397	3.42154	8.25038	5.80382	7.07195
ENST00000336483	ENSG00000145675	PIK3R1	2439	protein_coding	mRNA	0.0426314	0.570509	1.37931	up	0.793682	1.31186	0.589213	1.25958	1.82109	1.58432
ENST00000336486	ENSG00000077150	NFKB2	851	processed_transcript	lncRNA	0.0436611	0.576852	1.45284	up	0.197752	0.34267	0.256911	0.857681	0.558445	1.13075
ENST00000336596	ENSG00000044524	EPHA3	5809	protein_coding	mRNA	0.0382561	0.542981	1.40294	up	2.79557	4.00096	2.76514	4.27059	4.79477	5.25435
ENST00000336916	ENSG00000115414	FN1	8435	protein_coding	mRNA	0.018	0.368111	1.6346	up	3.42248	1.98537	4.57772	5.70324	6.49775	5.93272
ENST00000336949	ENSG00000165175	MID1IP1	2536	protein_coding	mRNA	0.00220852	0.355994	4.34845	up	6.26512	6.69002	0	14.189	13.7762	13.7899
ENST00000337014	ENSG00000169660	HEXDC	2285	protein_coding	mRNA	0.0416915	0.565932	1.78773	up	1.71378	0.78587	0.669677	2.67173	2.78752	2.22094
ENST00000337532	ENSG00000150054	MPP7	5080	protein_coding	mRNA	0.000568813	0.191004	5.58825	up	0.08306	0.005349	0	3.77633	5.42007	5.1564
ENST00000337656	ENSG00000095794	CREM	900	protein_coding	mRNA	0.0117513	0.367318	1.21908	up	0.297821	0.320048	0.304365	0.567047	0.526083	0.690768
ENST00000337738	ENSG00000119383	PPP2R4	2845	protein_coding	mRNA	0.0220422	0.408017	1.29907	up	3.81703	4.52452	4.45462	5.4626	5.96361	6.10195
ENST00000337752	ENSG00000197536	C5orf56	4767	protein_coding	mRNA	0.0105069	0.367318	1.21098	up	0.160009	0.147715	0.11159	0.45048	0.367202	0.318509
ENST00000337843	ENSG00000133466	C1QTNF6	2934	protein_coding	mRNA	0.0080622	0.367318	1.47173	up	6.07223	7.63148	4.51114	8.12408	9.39373	9.61809
ENST00000338008	ENSG00000039319	ZFYVE16	6773	protein_coding	mRNA	0.0390439	0.54779	1.71691	up	6.82568	6.23084	1.81558	9.41529	7.42182	6.88115
ENST00000338146	ENSG00000176422	SPRYD4	10779	protein_coding	mRNA	0.00157163	0.317559	2.42083	up	0.276761	0.088776	0.007354	1.86903	1.5088	1.7055
ENST00000338370	ENSG00000175756	AURKAIP1	1072	protein_coding	mRNA	0.00704678	0.367318	1.82051	up	4.74245	5.77864	1.5024	5.84009	8.24402	6.97402
ENST00000338754	ENSG00000128294	TPST2	5697	protein_coding	mRNA	0.0495225	0.610283	1.34007	up	1.38856	0.965937	1.2243	2.1209	2.11604	1.61235
ENST00000339145	ENSG00000126709	IFI6	822	protein_coding	mRNA	0.00499951	0.367318	5.74345	up	1.13872	1.95161	1.01079	9.66522	18.255	10.1703
ENST00000339411	ENSG00000065029	ZNF76	2447	protein_coding	mRNA	0.0426208	0.570509	1.79948	up	1.56405	0.694895	0.801191	2.6956	2.06191	2.9866
ENST00000339868	ENSG00000074621	SLC24A1	5678	protein_coding	mRNA	0.00650031	0.367318	1.40475	up	0	0	0	0.30605	0.516388	0.398663
ENST00000340096	ENSG00000046651	OFD1	3611	protein_coding	mRNA	0.0410316	0.561367	1.52225	up	2.79108	3.36522	2.57144	3.85739	5.90548	5.04984
ENST00000340126	ENSG00000067066	SP100	2926	protein_coding	mRNA	0.0286047	0.46778	1.20129	up	0	0	0.003625	0.228161	0.113778	0.272861
ENST00000340217	ENSG00000145451	GLRA3	3065	protein_coding	mRNA	0.000450633	0.17087	1.50262	up	0.312098	0.332426	0.195289	0.827693	0.950093	0.955354
ENST00000340339	ENSG00000159618	ADGRG5	3767	protein_coding	mRNA	0.00842742	0.367318	1.37952	up	0.120668	0	0	0.501842	0.374362	0.417857
ENST00000340342	ENSG00000135047	CTSL	1436	protein_coding	mRNA	0.00211567	0.348213	1.78984	up	6.63882	6.56687	10.105	13.6655	15.8209	14.8499
ENST00000340535	ENSG00000154305	MIA3	2735	protein_coding	mRNA	0.0453781	0.586462	1.53019	up	2.81566	2.32741	1.28798	3.61387	2.9514	4.33726
ENST00000340607	ENSG00000148344	PTGES	1774	protein_coding	mRNA	0.0251234	0.434521	2.40197	up	10.844	10.2732	0.687023	9.15266	13.3804	14.6706
ENST00000340855	ENSG00000010404	IDS	7619	protein_coding	mRNA	0.00173038	0.327025	1.44538	up	10.428	12.0141	5.80411	13.4409	12.3817	13.3447
ENST00000341028	ENSG00000248333	CDK11B	881	processed_transcript	lncRNA	0.00929852	0.367318	1.27969	up	0	0	0	0.195041	0.346903	0.301067
ENST00000341130	ENSG00000188051	TMEM221	1930	protein_coding	mRNA	0.0124065	0.367318	1.24465	up	0.131606	0.045082	0.317089	0.400556	0.42721	0.552432
ENST00000341469	ENSG00000106785	TRIM14	4454	protein_coding	mRNA	0.0279677	0.461209	2.13601	up	5.25223	3.21511	3.73361	12.4234	8.53907	8.50396
ENST00000341657	ENSG00000185722	ANKFY1	7418	protein_coding	mRNA	0.0159373	0.367318	1.27177	up	4.67819	5.1403	4.56881	6.10462	6.91595	6.01667
ENST00000342435	ENSG00000188313	PLSCR1	2233	protein_coding	mRNA	0.00360251	0.367318	2.86377	up	3.25931	4.5943	3.61585	14.5002	10.7933	12.9096
ENST00000342556	ENSG00000166886	NAB2	2318	protein_coding	mRNA	0.0425173	0.570279	1.29259	up	3.653	3.565	4.10208	6.08462	4.78878	4.81232
ENST00000342745	ENSG00000100647	SUSD6	5388	protein_coding	mRNA	0.0113202	0.367318	1.3756	up	6.56864	6.70517	3.1811	7.52533	6.85014	7.60538
ENST00000343376	ENSG00000267673	FDX1L	614	retained_intron	lncRNA	0.0206001	0.394367	1.29204	up	0.338487	0.487119	0.65134	1.05326	0.867176	0.89191
ENST00000343455	ENSG00000100697	DICER1	10277	protein_coding	mRNA	0.0221378	0.408833	1.39746	up	9.0085	9.10214	6.17425	10.9443	10.2464	12.948
ENST00000343600	ENSG00000139793	MBNL2	4596	protein_coding	mRNA	0.00297316	0.367318	1.5299	up	2.6127	2.94388	2.99565	5.26134	4.68498	4.76836
ENST00000343702	ENSG00000074527	NTN4	3615	protein_coding	mRNA	0.0151954	0.367318	2.75646	up	2.64944	2.75835	2.61599	8.08156	6.99988	13.2101
ENST00000344063	ENSG00000108107	RPL28	4796	protein_coding	mRNA	0.0043953	0.367318	3.3042	up	12.3252	7.07876	13.6026	36.3478	43.1547	35.8553
ENST00000344157	ENSG00000083896	YTHDC1	6232	protein_coding	mRNA	0.049706	0.611287	1.70502	up	3.62507	2.58686	1.93656	4.88701	6.54355	4.19644
ENST00000344213	ENSG00000115641	FHL2	1769	protein_coding	mRNA	0.0496065	0.611054	1.64979	up	0.732306	0.38905	0.435959	0.967003	1.74605	1.84861
ENST00000347635	ENSG00000093000	NUP50	5233	protein_coding	mRNA	0.0168638	0.367318	1.4564	up	11.0347	13.6655	5.99869	14.8738	12.3109	15.203
ENST00000348332	ENSG00000084676	NCOA1	6895	protein_coding	mRNA	0.0233762	0.419899	1.6506	up	0	0	0	0.515344	1.01797	0.469562
ENST00000348495	ENSG00000130511	SSBP4	1721	protein_coding	mRNA	0.0268926	0.450928	1.27238	up	14.1903	13.8766	13.5656	16.5304	17.4789	19.8199
ENST00000348655	ENSG00000185507	IRF7	1801	protein_coding	mRNA	0.00277118	0.367318	2.36571	up	0.133069	0.456372	0.225321	2.19091	1.74169	2.01649
ENST00000349048	ENSG00000141959	PFKL	2912	protein_coding	mRNA	0.0169115	0.367318	1.42451	up	60.2555	58.923	30.5068	60.2212	68.2109	70.0024
ENST00000349459	ENSG00000174516	PELI3	2783	protein_coding	mRNA	0.0237838	0.422628	1.49075	up	0.945844	0.695733	0.193538	1.30748	1.13379	1.48676
ENST00000350997	ENSG00000149485	FADS1	4525	protein_coding	mRNA	4.75842e-05	0.0865336	1.33929	up	19.8551	19.5091	22.6801	28.5136	27.8475	28.2251
ENST00000351205	ENSG00000172062	SMN1	900	protein_coding	mRNA	0.0286912	0.468617	2.45794	up	1.08853	2.30698	2.91339	8.55017	5.81794	5.49956
ENST00000351218	ENSG00000120784	ZFP30	6090	protein_coding	mRNA	0.0104097	0.367318	2.29002	up	0.240734	0.896647	0	2.42496	1.91788	1.61101
ENST00000352645	ENSG00000100403	ZC3H7B	5909	protein_coding	mRNA	0.0331038	0.505673	1.22913	up	15.3869	14.1931	10.5884	16.6833	15.6512	16.3569
ENST00000354026	ENSG00000140464	PML	2885	protein_coding	mRNA	0.00504425	0.367318	1.49017	up	1.65913	1.81175	2.36125	3.13278	3.58258	3.52878
ENST00000354258	ENSG00000168394	TAP1	2959	protein_coding	mRNA	0.0248329	0.432699	3.69445	up	5.00916	4.70027	5.35283	32.0056	12.305	24.4529
ENST00000354764	ENSG00000197121	PGAP1	11114	protein_coding	mRNA	0.0374564	0.537295	1.23862	up	2.17538	2.47241	0.953119	1.98679	2.46644	2.61537
ENST00000354858	ENSG00000004455	AK2	1021	protein_coding	mRNA	0.0190679	0.378473	1.64829	up	16.0814	17.3876	3.18907	14.2011	15.2304	17.8771
ENST00000354992	ENSG00000133424	LARGE	4409	protein_coding	mRNA	0.0328314	0.503207	1.22913	up	3.41436	2.96442	2.59196	3.90047	3.64031	4.02512
ENST00000355163	ENSG00000172530	BANP	1648	protein_coding	mRNA	0.0317739	0.495018	1.23996	up	0.000788	0	0	0.127716	0.325984	0.27466
ENST00000355468	ENSG00000141696	P3H4	2791	protein_coding	mRNA	0.00554643	0.367318	1.43871	up	0.108003	0	0.331597	0.764195	0.704349	0.523201
ENST00000355522	ENSG00000198535	C2CD4A	3445	protein_coding	mRNA	0.0194056	0.381446	1.67632	up	0.289515	0.4613	0.463818	1.01162	1.37908	1.72839
ENST00000355527	ENSG00000172893	DHCR7	2666	protein_coding	mRNA	0.0468592	0.593517	2.10892	up	25.1125	31.3945	28.2561	64.0375	42.2507	81.0958
ENST00000355619	ENSG00000005812	FBXL3	3503	protein_coding	mRNA	0.0134716	0.367318	1.54854	up	5.30504	6.568	1.71267	7.30402	6.26003	5.83134
ENST00000355809	ENSG00000134744	ZCCHC11	2152	protein_coding	mRNA	0.038483	0.544267	1.31007	up	0.152201	0.35235	0.234687	0.763827	0.633685	0.492807
ENST00000356183	ENSG00000077235	GTF3C1	7018	protein_coding	mRNA	0.0348269	0.517754	1.31036	up	20.6517	16.382	36.174	34.1963	27.7798	33.7483
ENST00000356321	ENSG00000198146	ZNF770	5439	protein_coding	mRNA	0.0142577	0.367318	2.10862	up	11.618	12.9389	0.904564	13.2717	11.5245	11.8329
ENST00000356406	ENSG00000087008	ACOX3	2860	protein_coding	mRNA	0.0406073	0.559068	2.62919	up	1.33493	0.44325	0.272959	3.5521	1.99281	4.4755
ENST00000356509	ENSG00000112312	GMNN	1133	protein_coding	mRNA	0.046266	0.591062	1.44671	up	4.53076	2.91549	4.90337	6.46461	7.09732	5.72338
ENST00000356554	ENSG00000198162	MAN1A2	8576	protein_coding	mRNA	0.0273414	0.455311	1.26476	up	10.5719	8.93368	8.7123	12.1057	11.9454	12.1629
ENST00000356762	ENSG00000130545	CRB3	733	protein_coding	mRNA	0.0197737	0.385062	1.44442	up	1.6177	1.91397	2.49542	3.50591	2.94177	3.68479
ENST00000356983	ENSG00000160781	PAQR6	2143	protein_coding	mRNA	0.0317462	0.494969	1.85419	up	0.483255	0.056098	0.66146	1.42872	1.21903	2.25146
ENST00000357082	ENSG00000259305	ZHX1-C8orf76	1257	protein_coding	mRNA	0.0324552	0.500544	1.45886	up	0.536524	0.613931	0.802882	1.11836	1.37933	1.80645
ENST00000357085	ENSG00000112343	TRIM38	9413	protein_coding	mRNA	0.0216783	0.406107	1.2368	up	0.39374	0.283398	0.334866	0.643205	0.564175	0.76102
ENST00000357710	ENSG00000080815	PSEN1	2776	protein_coding	mRNA	0.0491317	0.607969	1.35404	up	2.61672	3.3113	4.25873	5.42502	4.49081	5.01522
ENST00000357847	ENSG00000146416	AIG1	1395	protein_coding	mRNA	0.00434412	0.367318	1.42808	up	2.55139	2.4657	2.06788	4.033	3.78861	3.47163
ENST00000358514	ENSG00000205220	PSMB10	1218	protein_coding	mRNA	0.012055	0.367318	2.56535	up	2.01273	2.59672	2.33016	6.58276	6.15374	10.1776
ENST00000358531	ENSG00000213390	ARHGAP19	5463	protein_coding	mRNA	0.0249253	0.433584	1.44051	up	5.91642	6.7772	1.97686	5.3373	7.27839	6.85193
ENST00000358743	ENSG00000183963	SMTN	3198	protein_coding	mRNA	0.0291009	0.471704	1.69156	up	0	0.313514	0	0.807775	0.57156	1.17102
ENST00000358747	ENSG00000225697	SLC26A6	2729	protein_coding	mRNA	0.0476951	0.599025	1.3388	up	1.04418	0.76728	0.36226	1.30994	1.35981	1.06315
ENST00000359623	ENSG00000127399	LRRC61	1877	protein_coding	mRNA	0.00560507	0.367318	2.27958	up	8.38524	9.3479	1.10338	11.8671	10.2005	12.065
ENST00000359644	ENSG00000017260	ATP2C1	3401	protein_coding	mRNA	0.0235236	0.421002	1.65965	up	0.125312	0.659568	0.058189	0.863262	1.198	1.09088
ENST00000359678	ENSG00000198130	HIBCH	1939	protein_coding	mRNA	0.0415761	0.564894	1.57947	up	3.79193	3.43826	0.444669	3.06793	4.09631	3.84988
ENST00000359761	ENSG00000115935	WIPF1	2003	protein_coding	mRNA	0.00767497	0.367318	1.36095	up	2.79207	2.92075	1.98934	3.98048	3.40344	3.90077
ENST00000359832	ENSG00000241468	ATP5J2	323	protein_coding	mRNA	0.0367719	0.532512	1.46996	up	2.66865	2.58419	3.83996	4.95422	4.09579	5.98243
ENST00000359856	ENSG00000162704	ARPC5	7209	protein_coding	mRNA	0.00857519	0.367318	1.94649	up	3.03171	3.41093	9.34313	11.6688	10.0051	10.22
ENST00000359949	ENSG00000135124	P2RX4	1836	protein_coding	mRNA	0.0362208	0.529057	1.903	up	0.054778	0.043852	0.067233	0.619604	1.70224	0.852138
ENST00000359957	ENSG00000174744	BRMS1	1445	protein_coding	mRNA	0.0438373	0.577778	1.29598	up	13.4962	12.7407	13.2446	18.5451	15.1248	18.6674
ENST00000359979	ENSG00000107771	CCSER2	2066	protein_coding	mRNA	0.0278673	0.460116	1.7845	up	0.884452	0.305985	0.703194	1.55068	2.31494	1.88206
ENST00000360310	ENSG00000198604	BAZ1A	6010	protein_coding	mRNA	0.00264401	0.367318	2.04772	up	8.23447	6.02536	8.56766	17.0637	16.1755	16.8074
ENST00000360356	ENSG00000138496	PARP9	3198	protein_coding	mRNA	0.00141746	0.302267	3.15038	up	0.088876	0.191818	0.030361	3.05113	2.29934	2.07492
ENST00000360688	ENSG00000102886	GDPD3	1306	retained_intron	lncRNA	0.00312817	0.367318	1.25365	up	1.90389	2.11003	1.69291	2.72173	2.6029	2.50511
ENST00000360742	ENSG00000129696	TTI2	2242	protein_coding	mRNA	0.0130873	0.367318	1.53923	up	2.14153	1.87339	1.84717	3.64379	3.01794	3.99378
ENST00000360961	ENSG00000060762	MPC1	962	protein_coding	mRNA	0.0334313	0.508214	1.24401	up	5.59037	6.11333	3.08113	6.5407	5.54709	5.85497
ENST00000361099	ENSG00000115415	STAT1	4310	protein_coding	mRNA	0.00153187	0.311784	3.38006	up	13.9366	16.2159	23.7021	68.3112	55.1887	66.2838
ENST00000361157	ENSG00000126709	IFI6	841	protein_coding	mRNA	0.000100718	0.0905892	17.2293	up	9.72823	6.91879	14.1913	184.96	220.206	174.403
ENST00000361574	ENSG00000198858	R3HDM4	1815	protein_coding	mRNA	0.00673579	0.367318	1.59629	up	9.6829	6.75333	15.8253	16.514	18.0231	17.9491
ENST00000361603	ENSG00000188153	COL4A5	6469	protein_coding	mRNA	0.00852525	0.367318	1.63894	up	3.76804	4.13626	3.63868	5.99661	6.96288	7.85245
ENST00000361676	ENSG00000186575	NF2	1716	protein_coding	mRNA	0.0437885	0.577643	1.48551	up	0	0	0	0.247934	0.476843	0.775301
ENST00000361757	ENSG00000064932	SBNO2	4923	protein_coding	mRNA	0.0124611	0.367318	1.6769	up	17.5474	16.9269	6.20689	21.3339	20.3202	19.4703
ENST00000361923	ENSG00000049246	PER3	6203	protein_coding	mRNA	0.0456017	0.587615	1.64396	up	0.183308	0.718242	0.80208	1.38471	1.77441	1.5252
ENST00000361976	ENSG00000198825	INPP5F	5063	protein_coding	mRNA	0.00010131	0.0905892	1.57857	up	2.74746	2.93627	2.01267	4.5351	4.62818	4.38898
ENST00000361988	ENSG00000102312	PORCN	1672	protein_coding	mRNA	0.00581138	0.367318	2.07993	up	0.208442	0.118877	0	1.31368	0.963997	1.61916
ENST00000362020	ENSG00000126709	IFI6	828	protein_coding	mRNA	0.00338361	0.367318	16.429	up	2.13209	2.56512	1.44082	33.6727	84.5384	37.4767
ENST00000365161	ENSG00000202031	SNORD38A	70	snoRNA	ncRNA	0.00839395	0.367318	1.29211	up	0.670693	0.425285	1.42492	1.55295	1.23535	1.36001
ENST00000366097	ENSG00000203266	RP11-560A15.3	770	lincRNA	lncRNA	0.0345882	0.516238	1.20071	up	0.055184	0.086322	0.016262	0.196452	0.216521	0.371899
ENST00000366466	ENSG00000165264	NDUFB6	761	protein_coding	mRNA	0.0108421	0.367318	1.24745	up	0.464899	0.491118	0.067143	0.590496	0.563531	0.725364
ENST00000366514	ENSG00000162851	TFB2M	1848	protein_coding	mRNA	0.00263488	0.367318	1.24582	up	4.34626	4.53026	3.7884	5.53001	5.20049	5.61819
ENST00000366630	ENSG00000116991	SIPA1L2	6690	protein_coding	mRNA	0.0444822	0.580803	2.17721	up	3.27616	3.05394	0	5.42503	4.70667	2.89467
ENST00000366704	ENSG00000154358	OBSCN	2534	retained_intron	lncRNA	0.0216447	0.405863	1.22781	up	0	0.048183	0	0.251279	0.327239	0.162335
ENST00000367103	ENSG00000162889	MAPKAPK2	2961	protein_coding	mRNA	0.0010565	0.256775	2.28806	up	14.0432	15.4443	14.8651	38.866	33.0398	33.6358
ENST00000367137	ENSG00000133065	SLC41A1	4997	protein_coding	mRNA	0.0137208	0.367318	1.70053	up	5.54918	6.5088	10.7875	13.0172	12.883	14.8526
ENST00000367259	ENSG00000117153	KLHL12	2257	protein_coding	mRNA	0.0168204	0.367318	1.79514	up	0.546616	1.24387	0.825581	2.3486	2.33441	2.23649
ENST00000367287	ENSG00000134375	TIMM17A	1659	protein_coding	mRNA	0.0158495	0.367318	1.25552	up	15.5542	15.794	10.5875	18.0267	16.1853	17.3906
ENST00000367463	ENSG00000111962	UST	4198	protein_coding	mRNA	0.0466103	0.592769	1.26951	up	2.63227	2.49775	1.22601	3.0829	2.62318	2.63335
ENST00000367558	ENSG00000143333	RGS16	2427	protein_coding	mRNA	0.0152107	0.367318	2.23916	up	2.41702	3.42981	1.77434	7.81543	4.92727	7.49139
ENST00000367669	ENSG00000143207	RFWD2	3033	protein_coding	mRNA	0.0282075	0.463931	1.59866	up	5.91655	9.3684	4.37483	10.9064	10.9786	9.14792
ENST00000368076	ENSG00000162734	PEA15	2694	protein_coding	mRNA	0.0481186	0.601772	1.54004	up	0.366863	0.269474	0.304263	0.638523	1.08338	1.41745
ENST00000368226	ENSG00000152894	PTPRK	6087	protein_coding	mRNA	0.00831961	0.367318	2.37925	up	9.52739	20.4296	2.99243	21.4086	18.9883	20.4429
ENST00000368321	ENSG00000132680	KIAA0907	2947	protein_coding	mRNA	0.00777501	0.367318	1.26497	up	5.12969	5.58627	4.4661	6.56111	6.98994	6.20195
ENST00000368450	ENSG00000160691	SHC1	3059	protein_coding	mRNA	0.0196062	0.383294	1.84712	up	6.66597	8.30357	0.078577	4.69773	6.86051	6.71381
ENST00000368608	ENSG00000189241	TSPYL1	3326	protein_coding	mRNA	0.0029468	0.367318	10.5056	up	0	0	24.8186	38.4483	36.8226	32.8666
ENST00000368633	ENSG00000160741	CRTC2	2644	protein_coding	mRNA	0.00257184	0.367318	1.37974	up	9.7999	10.703	7.86648	12.5341	12.889	14.0292
ENST00000368723	ENSG00000143556	S100A7	479	protein_coding	mRNA	0.0268725	0.450928	7.59536	up	1.93899	3.21967	4.49997	14.2186	32.5917	60.6499
ENST00000368733	ENSG00000143546	S100A8	523	protein_coding	mRNA	0.0349063	0.51866	2.22686	up	19.38	21.6226	26.1449	64.5914	35.3413	59.1453
ENST00000368797	ENSG00000188690	UROS	1313	protein_coding	mRNA	0.0009661	0.244732	1.49129	up	6.01334	5.16274	8.54017	10.1775	10.0274	10.8223
ENST00000368811	ENSG00000197747	S100A10	1202	protein_coding	mRNA	0.0054852	0.367318	1.91435	up	37.3335	29.4931	118.443	95.6571	117.936	103.797
ENST00000368886	ENSG00000095574	IKZF5	4555	protein_coding	mRNA	0.00180283	0.330103	1.36035	up	2.97569	3.57836	0.678545	2.95309	3.04664	3.12022
ENST00000369210	ENSG00000165863	C10orf82	994	protein_coding	mRNA	0.00885789	0.367318	1.34763	up	0.001187	0.017267	0.312033	0.571354	0.39751	0.553343
ENST00000369299	ENSG00000131788	PIAS3	1235	retained_intron	lncRNA	0.037216	0.536029	2.24468	up	1.05437	3.39395	1.23024	4.91767	5.15622	4.82509
ENST00000369620	ENSG00000160211	G6PD	1799	protein_coding	mRNA	0.0412645	0.562941	1.27961	up	50.0141	48.878	63.3034	66.1249	65.5528	78.793
ENST00000369649	ENSG00000126903	SLC10A3	1763	protein_coding	mRNA	0.0020794	0.346528	1.75699	up	0.741582	0.70629	0.887161	2.43124	1.89304	2.11373
ENST00000369752	ENSG00000162777	DENND2D	1894	protein_coding	mRNA	0.0177067	0.367318	1.2411	up	8.34567	7.6044	8.51635	10.9585	9.65174	10.6286
ENST00000369764	ENSG00000107960	OBFC1	1311	protein_coding	mRNA	0.0340759	0.512293	1.26313	up	2.6259	3.80555	1.70001	3.58694	3.35983	3.38516
ENST00000369816	ENSG00000118402	ELOVL4	3042	protein_coding	mRNA	0.0178644	0.367318	1.20414	up	0.827246	0.940204	1.21761	1.35076	1.40183	1.49081
ENST00000369825	ENSG00000173915	USMG5	789	protein_coding	mRNA	0.000362216	0.153964	1.36963	up	0.402379	0.36216	0.477711	0.935104	0.900274	0.995182
ENST00000370055	ENSG00000198910	L1CAM	4655	protein_coding	mRNA	0.00395741	0.367318	1.35893	up	13.7494	15.2972	14.0771	20.6207	19.5374	19.3387
ENST00000370223	ENSG00000107816	LZTS2	2883	protein_coding	mRNA	0.028764	0.469423	1.33028	up	11.8886	13.2188	8.72059	16.0298	15.5274	13.0978
ENST00000370277	ENSG00000147400	CETN2	1454	protein_coding	mRNA	0.00713434	0.367318	1.46293	up	21.6547	21.8401	10.0936	23.1312	24.253	25.2575
ENST00000370466	ENSG00000162645	GBP2	2220	protein_coding	mRNA	0.0132063	0.367318	1.77804	up	3.87814	4.13322	4.85625	7.62948	7.65071	10.2956
ENST00000370473	ENSG00000117228	GBP1	3035	protein_coding	mRNA	0.0131044	0.367318	2.74931	up	0.022068	0.033308	0.112963	1.63576	1.3353	3.01295
ENST00000370565	ENSG00000137975	CLCA2	4025	protein_coding	mRNA	0.0312379	0.490618	1.46267	up	0.32012	0.430162	0.408412	0.723888	1.14537	1.24962
ENST00000370626	ENSG00000119986	AVPI1	1457	protein_coding	mRNA	0.0173674	0.367318	1.66733	up	4.47263	6.77658	4.3381	9.50873	8.42316	9.19462
ENST00000371065	ENSG00000213625	LEPROT	4622	protein_coding	mRNA	0.00548968	0.367318	2.70542	up	2.04709	3.33263	2.22954	9.01635	9.16685	7.05751
ENST00000371521	ENSG00000188566	NDOR1	2497	protein_coding	mRNA	0.00811272	0.367318	1.409	up	0.360384	0.278754	0.224634	0.944183	0.690121	0.796645
ENST00000371728	ENSG00000138182	KIF20B	6419	protein_coding	mRNA	0.0139398	0.367318	1.61045	up	0.549498	0.7698	0.91578	1.6804	1.61455	2.19084
ENST00000371842	ENSG00000169925	BRD3	574	protein_coding	mRNA	0.0471957	0.595701	1.28164	up	0.499997	0.83492	0.299655	1.06149	0.992762	0.75343
ENST00000372157	ENSG00000108219	TSPAN14	855	protein_coding	mRNA	0.0166618	0.367318	1.52558	up	0.18094	0.275817	0.543968	1.21215	0.792327	1.15807
ENST00000372339	ENSG00000117408	IPO13	1201	protein_coding	mRNA	0.00608566	0.367318	1.21358	up	0.184684	0.26344	0.030035	0.318418	0.421313	0.426918
ENST00000372530	ENSG00000124574	ABCC10	5033	protein_coding	mRNA	0.00629437	0.367318	2.49971	up	0.184898	0.026464	1.61706	3.8076	2.13434	2.81567
ENST00000372573	ENSG00000198815	FOXJ3	5309	protein_coding	mRNA	0.00184253	0.332027	1.81674	up	0.023065	0.031229	0.093128	0.954323	0.741257	1.05238
ENST00000372599	ENSG00000136802	LRRC8A	4161	protein_coding	mRNA	0.0497208	0.611307	1.22517	up	0.189867	0.09421	0	0.213458	0.379593	0.402372
ENST00000372723	ENSG00000244274	DBNDD2	1118	protein_coding	mRNA	0.0348798	0.51833	1.59502	up	1.13849	1.1822	0.238011	1.82556	1.2995	2.29717
ENST00000372874	ENSG00000196839	ADA	1539	protein_coding	mRNA	0.0313103	0.491101	1.44282	up	1.05563	1.60849	1.75053	2.46658	2.72461	2.50154
ENST00000373048	ENSG00000183317	EPHA10	5425	protein_coding	mRNA	0.00316621	0.367318	1.62523	up	0.294772	0.270919	0.418415	0.97723	1.2367	1.30161
ENST00000373433	ENSG00000101413	RPRD1B	3874	protein_coding	mRNA	0.0124297	0.367318	1.44757	up	10.9693	11.756	3.98584	11.8417	12.1194	10.8257
ENST00000373555	ENSG00000136935	GOLGA1	4811	protein_coding	mRNA	0.0195936	0.383237	1.36379	up	3.74523	4.49793	4.62166	6.18368	6.66322	5.83301
ENST00000373873	ENSG00000124006	OBSL1	3297	protein_coding	mRNA	0.0284072	0.466268	1.38337	up	26.4	28.2967	27.7397	33.6472	42.5963	39.3952
ENST00000373943	ENSG00000117758	STX12	3079	protein_coding	mRNA	0.0491127	0.607796	1.89512	up	2.52994	6.5149	1.78802	6.57462	6.9204	6.43381
ENST00000374114	ENSG00000244462	RBM12	6662	protein_coding	mRNA	0.000914204	0.242135	3.90729	up	0.721788	0.680764	0.286013	5.5078	4.05971	5.45516
ENST00000374271	ENSG00000175087	PDIK1L	4279	protein_coding	mRNA	0.0427307	0.570854	1.52618	up	0.077202	0.229443	0.734289	0.978247	0.820205	1.4113
ENST00000374379	ENSG00000169504	CLIC4	4346	protein_coding	mRNA	0.0142567	0.367318	1.56525	up	23.0081	27.0834	4.97421	23.1847	21.969	20.8663
ENST00000374736	ENSG00000165029	ABCA1	10494	protein_coding	mRNA	0.00465902	0.367318	1.28028	up	2.43403	2.22717	2.52838	3.38175	3.17236	3.53888
ENST00000374831	ENSG00000204256	BRD2	4807	protein_coding	mRNA	0.026046	0.443958	1.8087	up	13.4927	16.0688	1.92866	15.7454	11.5567	14.5012
ENST00000374859	ENSG00000240065	PSMB9	782	protein_coding	mRNA	0.00528754	0.367318	5.51828	up	1.10328	0.711297	0	9.44923	4.93384	7.87457
ENST00000374866	ENSG00000204262	COL5A2	6949	protein_coding	mRNA	0.0377617	0.539415	1.24687	up	0.296416	0.342926	0.249658	0.743678	0.458445	0.643514
ENST00000374882	ENSG00000204264	PSMB8	1124	protein_coding	mRNA	0.00513822	0.367318	1.88233	up	0	0	0	0.89988	1.12935	0.648982
ENST00000374897	ENSG00000204267	TAP2	5684	protein_coding	mRNA	0.00109236	0.261251	2.53649	up	1.3072	1.44581	1.03083	4.97924	3.99991	5.09214
ENST00000374980	ENSG00000125977	EIF2S2	2656	protein_coding	mRNA	0.000946175	0.243492	1.43412	up	17.5646	17.8381	22.4455	28.0788	27.8035	28.9285
ENST00000375031	ENSG00000189410	SH2D5	3705	protein_coding	mRNA	0.00133813	0.289937	1.29046	up	0.513871	0.547773	0.075442	0.689699	0.741173	0.737584
ENST00000375180	ENSG00000184083	FAM120C	8057	protein_coding	mRNA	0.0122467	0.367318	1.54943	up	3.07443	4.68809	2.31891	5.2357	5.61564	5.46689
ENST00000375304	ENSG00000072506	HSD17B10	916	protein_coding	mRNA	0.0417495	0.566327	1.6561	up	1.92579	1.28339	1.60476	2.99909	2.7545	4.30449
ENST00000375651	ENSG00000204389	HSPA1A	2483	protein_coding	mRNA	0.0149008	0.367318	2.03944	up	102.035	91.4453	28.9954	130.334	116.178	129.736
ENST00000375710	ENSG00000134333	LDHA	2169	retained_intron	lncRNA	0.0429255	0.572054	1.3234	up	19.9263	17.417	15.6961	20.9759	24.0008	25.5179
ENST00000375780	ENSG00000213719	CLIC1	1560	protein_coding	mRNA	0.0170625	0.367318	1.38307	up	0.005507	0.100809	0.052631	0.320452	0.470513	0.581743
ENST00000375882	ENSG00000204435	CSNK2B	948	protein_coding	mRNA	0.0173949	0.367318	4.1607	up	101.372	100.274	1.61125	96.0555	104.147	104.99
ENST00000375963	ENSG00000083223	ZCCHC6	5379	protein_coding	mRNA	0.026854	0.45089	1.34177	up	3.73469	4.04555	4.70759	6.66776	5.29371	5.99098
ENST00000376016	ENSG00000136758	YME1L1	3856	protein_coding	mRNA	0.00445415	0.367318	1.79371	up	19.929	30.6396	7.24003	30.8105	27.5023	27.59
ENST00000376029	ENSG00000151287	TEX30	959	protein_coding	mRNA	0.0324522	0.500544	1.36491	up	0.555606	0.724671	0.50496	1.23432	0.900386	1.37858
ENST00000376105	ENSG00000125968	ID1	1233	protein_coding	mRNA	0.0175177	0.367318	1.97018	up	8.91752	8.62934	2.81743	10.1345	12.2147	15.2711
ENST00000376112	ENSG00000125968	ID1	994	protein_coding	mRNA	0.0189168	0.376952	4.14918	up	110.767	107.828	2.57983	134.175	109.833	118.859
ENST00000376357	ENSG00000196998	WDR45	567	processed_transcript	lncRNA	0.0250119	0.433784	1.24789	up	0	0	0	0.313849	0.299132	0.139178
ENST00000376392	ENSG00000011052	NME1-NME2	894	protein_coding	mRNA	0.040111	0.555386	1.22547	up	6.15472	6.32177	4.74437	7.60684	6.38024	7.39949
ENST00000376447	ENSG00000165105	RASEF	5576	protein_coding	mRNA	0.000150561	0.102501	1.79741	up	2.55386	2.36429	2.51058	5.2705	5.0889	5.4096
ENST00000376509	ENSG00000102096	PIM2	2075	protein_coding	mRNA	0.00809245	0.367318	1.56029	up	4.2676	3.5842	6.64291	7.17358	8.6283	8.59246
ENST00000376630	ENSG00000204592	HLA-E	2601	protein_coding	mRNA	0.00396297	0.367318	1.6687	up	32.6225	31.6956	20.388	42.5153	45.2005	49.6451
ENST00000376692	ENSG00000116670	MAD2L2	1118	protein_coding	mRNA	0.00463635	0.367318	3.08745	up	3.24039	3.83837	7.94228	18.7682	13.95	19.317
ENST00000376745	ENSG00000172531	PPP1CA	1476	protein_coding	mRNA	0.0180235	0.368116	1.35962	up	102.774	102.037	48.4014	105.565	101.99	106.448
ENST00000376758	ENSG00000204619	PPP1R11	1723	protein_coding	mRNA	0.00855363	0.367318	1.74971	up	0.046368	0.314237	0.132992	0.878954	1.21429	0.980184
ENST00000376769	ENSG00000204619	PPP1R11	1689	protein_coding	mRNA	0.0248835	0.433112	1.69527	up	0.553858	1.16232	0.423369	1.94444	1.41602	2.11544
ENST00000376770	ENSG00000132879	FBXO44	3320	protein_coding	mRNA	0.029939	0.479456	1.51443	up	0.293736	0.911205	0	0.802362	1.01624	1.1699
ENST00000377044	ENSG00000135048	TMEM2	6523	protein_coding	mRNA	0.00539619	0.367318	1.66436	up	3.76094	3.36739	2.99953	6.46251	5.54369	6.70933
ENST00000377046	ENSG00000172977	KAT5	2237	protein_coding	mRNA	0.00257477	0.367318	1.56761	up	0.248378	0.182718	1.51357	1.51856	1.4499	1.60833
ENST00000377126	ENSG00000119138	KLF9	5175	protein_coding	mRNA	0.0350272	0.519783	1.57121	up	3.71493	4.8759	0.236944	2.71615	4.44491	4.15828
ENST00000377294	ENSG00000187626	ZKSCAN4	2375	protein_coding	mRNA	0.0185867	0.373166	1.5543	up	1.27356	2.10386	0.95731	2.78028	2.86487	2.35024
ENST00000377482	ENSG00000116285	ERRFI1	3104	protein_coding	mRNA	0.0285839	0.467757	2.36848	up	1.66217	1.92995	9.71344	7.87986	12.8654	10.1376
ENST00000377724	ENSG00000122741	DCAF10	3862	protein_coding	mRNA	0.00653388	0.367318	1.27765	up	1.39083	1.33397	0.952524	1.69963	1.77156	1.94626
ENST00000377777	ENSG00000158373	HIST1H2BD	496	protein_coding	mRNA	0.0123086	0.367318	4.08361	up	14.4175	16.2591	1e-06	14.9754	22.2364	29.9388
ENST00000378319	ENSG00000136147	PHF11	1359	protein_coding	mRNA	0.0432675	0.574614	1.96616	up	3.89016	1.69339	3.06983	5.63488	6.9374	7.01017
ENST00000378373	ENSG00000130762	ARHGEF16	2211	protein_coding	mRNA	0.017609	0.367318	1.30768	up	0.18693	0.059333	0.015993	0.493924	0.363506	0.385748
ENST00000378578	ENSG00000165169	DYNLT3	2217	protein_coding	mRNA	0.00104981	0.256189	2.1576	up	3.76706	2.4489	13.2824	13.8986	14.3526	11.7536
ENST00000378618	ENSG00000149179	C11orf49	1166	protein_coding	mRNA	0.0335196	0.508665	1.21689	up	0.101243	0.142412	0.120435	0.28969	0.320831	0.488299
ENST00000378975	ENSG00000161265	U2AF1L4	747	protein_coding	mRNA	0.0200153	0.387271	1.25298	up	0.065956	0	0.272508	0.433422	0.291875	0.493188
ENST00000379440	ENSG00000171867	PRNP	2657	protein_coding	mRNA	0.000204723	0.113565	7.39514	up	0.30721	0.109093	0.10605	7.26906	8.68984	7.02014
ENST00000379449	ENSG00000198363	ASPH	1603	protein_coding	mRNA	0.0333156	0.507355	1.25662	up	0.435058	0.575642	0.464573	0.934708	0.978997	0.705058
ENST00000379619	ENSG00000075426	FOSL2	5829	protein_coding	mRNA	0.000247555	0.124273	1.41863	up	0.736387	0.848055	0.236484	1.17144	1.16704	1.26354
ENST00000379701	ENSG00000107262	BAG1	1977	retained_intron	lncRNA	0.0337217	0.509911	1.2199	up	1.16946	1.47309	1.12432	1.9091	1.6767	1.61216
ENST00000379775	ENSG00000170525	PFKFB3	4483	protein_coding	mRNA	0.00982016	0.367318	2.18432	up	3.62975	3.87351	1.5191	5.78616	6.74962	9.1362
ENST00000379883	ENSG00000107201	DDX58	4353	protein_coding	mRNA	0.00147933	0.307141	2.65268	up	1.77874	2.28602	2.65245	8.4132	7.09877	7.38458
ENST00000379958	ENSG00000205413	SAMD9	6852	protein_coding	mRNA	0.0025408	0.367318	3.64789	up	0.179732	0.000158	0.17985	4.11969	2.53644	2.80951
ENST00000379982	ENSG00000164292	RHOBTB3	5537	protein_coding	mRNA	0.00815322	0.367318	1.90107	up	35.9009	29.3129	26.7262	54.6511	55.2605	65.3705
ENST00000380139	ENSG00000139597	N4BP2L1	2994	protein_coding	mRNA	0.00914848	0.367318	1.3033	up	0.02504	0.002499	0	0.413776	0.285598	0.250667
ENST00000380272	ENSG00000145945	FAM50B	1628	protein_coding	mRNA	0.0399867	0.554538	1.53907	up	1.52529	2.13483	0	2.22426	1.37875	2.16902
ENST00000380274	ENSG00000145945	FAM50B	1932	protein_coding	mRNA	0.0200749	0.38801	1.35649	up	1.52261	1.50794	0.190429	1.41514	1.68856	1.56598
ENST00000380319	ENSG00000169239	CA5B	652	retained_intron	lncRNA	0.00679557	0.367318	1.32768	up	0.110333	0.161089	0.412943	0.645124	0.571967	0.705182
ENST00000380384	ENSG00000137154	RPS6	1355	protein_coding	mRNA	0.0275033	0.456812	1.52073	up	27.8573	39.5892	23.2636	39.9628	49.0086	44.6565
ENST00000380485	ENSG00000102048	ASB9	1652	protein_coding	mRNA	0.0228758	0.415174	2.23484	up	0.474734	0.634745	0.154686	3.04876	1.35016	2.11242
ENST00000380502	ENSG00000147874	HAUS6	6536	protein_coding	mRNA	0.0120876	0.367318	1.30262	up	3.69478	3.25426	4.2744	5.57795	5.34788	4.74724
ENST00000380503	ENSG00000169592	INO80E	435	retained_intron	lncRNA	0.032432	0.500544	1.3205	up	1.64253	1.49168	0.98169	1.7415	2.29102	2.19634
ENST00000380516	ENSG00000137776	SLTM	4147	protein_coding	mRNA	0.00936261	0.367318	1.23	up	9.30139	9.72796	8.62064	12.0632	11.5869	10.854
ENST00000380799	ENSG00000164975	SNAPC3	753	protein_coding	mRNA	0.0136167	0.367318	1.25548	up	0.043222	0.108074	0.019477	0.364033	0.372498	0.233378
ENST00000380872	ENSG00000187134	AKR1C1	6705	protein_coding	mRNA	0.0342592	0.513696	1.23557	up	1.04574	0.863964	0.515016	1.07963	1.22838	1.26237
ENST00000381337	ENSG00000066654	THUMPD1	4122	protein_coding	mRNA	0.00150596	0.309511	1.54395	up	3.17041	2.6524	5.61443	6.56017	6.76408	5.90544
ENST00000381793	ENSG00000163694	RBM47	4816	protein_coding	mRNA	0.000813374	0.227482	1.23494	up	0	0	0	0.22301	0.214877	0.267428
ENST00000381801	ENSG00000139505	MTMR6	5659	protein_coding	mRNA	0.0268527	0.45089	1.43304	up	2.89514	3.53424	4.58546	6.25613	5.17723	5.75471
ENST00000381941	ENSG00000125898	FAM110A	1809	protein_coding	mRNA	0.0102395	0.367318	3.05013	up	0.014644	0.058625	1.68062	3.79528	2.4624	4.7277
ENST00000382020	ENSG00000104723	TUSC3	3683	protein_coding	mRNA	0.0151324	0.367318	1.24331	up	6.45372	7.52195	4.52507	8.11761	7.35717	7.3179
ENST00000382192	ENSG00000122386	ZNF205	2062	protein_coding	mRNA	0.0170334	0.367318	1.33181	up	1.76623	1.57991	3.43898	3.15408	3.1327	3.73731
ENST00000382280	ENSG00000162078	ZG16B	831	protein_coding	mRNA	0.0061186	0.367318	1.32584	up	3.49373	3.07972	3.57061	5.15744	4.62889	4.71355
ENST00000382384	ENSG00000157954	WIPI2	1948	protein_coding	mRNA	0.0284734	0.467054	1.30713	up	2.77733	3.49235	3.20811	4.24471	4.7425	4.2846
ENST00000382611	ENSG00000170561	IRX2	2630	protein_coding	mRNA	0.0488836	0.606206	1.63529	up	0.888425	0.952558	1.30367	3.30743	1.73243	2.2546
ENST00000382666	ENSG00000180185	FAHD1	1964	protein_coding	mRNA	0.0319095	0.495893	1.24611	up	0.244355	0.464384	0.082532	0.43901	0.528925	0.665046
ENST00000382708	ENSG00000092010	PSME1	1136	protein_coding	mRNA	0.0376876	0.538981	9.64592	up	0.285867	0.552692	1.06692	9.29265	45.1341	7.21675
ENST00000382722	ENSG00000151062	CACNA2D4	5475	protein_coding	mRNA	0.0495431	0.610475	1.21037	up	0	0.175722	0.158128	0.375929	0.336134	0.321292
ENST00000382745	ENSG00000103249	CLCN7	4720	protein_coding	mRNA	0.0221543	0.408833	1.32275	up	6.76469	6.15239	6.63247	9.61814	9.33803	7.99971
ENST00000383620	ENST00000383620	HLA-H-001	1096	unprocessed_pseudogene	lncRNA	0.00828303	0.367318	1.68545	up	1.93241	1.99474	2.29396	3.65124	4.11317	4.91243
ENST00000383789	ENSG00000206562	METTL6	1413	protein_coding	mRNA	0.0277905	0.459608	1.21233	up	1.80903	1.6457	1.04721	2.05255	1.92093	1.90968
ENST00000386910	ENSG00000209645	SNORD105	85	snoRNA	ncRNA	0.0225227	0.411696	1.23964	up	0.41763	0.223449	0.730199	0.949526	0.813806	0.697824
ENST00000388825	ENSG00000211445	GPX3	1636	protein_coding	mRNA	0.0283885	0.466151	1.96265	up	4.39628	8.63644	2.7407	9.55636	8.55194	11.8942
ENST00000389131	ENSG00000134013	LOXL2	3549	protein_coding	mRNA	0.00969383	0.367318	1.60291	up	2.65417	2.79574	2.76045	4.45487	5.83553	4.7584
ENST00000389735	ENSG00000183624	HMCES	1763	protein_coding	mRNA	0.0243522	0.428281	1.83526	up	2.56602	2.61677	2.96487	7.30367	4.42253	6.14321
ENST00000391834	ENSG00000204673	AKT1S1	1849	protein_coding	mRNA	0.0199677	0.387078	1.53008	up	0	0.204007	0	0.411814	0.699849	0.758352
ENST00000391894	ENSG00000082482	KCNK2	1491	protein_coding	mRNA	0.0087194	0.367318	2.13007	up	0.74683	1.3951	0.859454	2.97861	3.78679	2.85015
ENST00000392322	ENSG00000115415	STAT1	2716	protein_coding	mRNA	0.0133794	0.367318	4.01114	up	5.80961	2.33975	3.06785	20.3886	15.6958	15.6724
ENST00000392323	ENSG00000115415	STAT1	2723	protein_coding	mRNA	0.00921773	0.367318	2.44442	up	0.303477	0.435386	0.891863	3.48808	1.99737	3.04387
ENST00000392583	ENSG00000111335	OAS2	4734	protein_coding	mRNA	0.0133937	0.367318	2.2212	up	0.080587	0.076933	0	1.90055	0.849126	1.35426
ENST00000392711	ENSG00000108946	PRKAR1A	4327	protein_coding	mRNA	0.0180196	0.368116	3.90543	up	0.476023	0	8.80414	15.882	5.63222	9.94431
ENST00000392771	ENSG00000153246	PLA2R1	5160	protein_coding	mRNA	0.0378712	0.540334	1.63092	up	0.540672	0	0.354964	1.01141	1.16923	1.13106
ENST00000393375	ENSG00000171204	TMEM126B	1210	protein_coding	mRNA	0.0126129	0.367318	1.37242	up	3.95389	6.02996	1.32369	4.32821	5.12983	4.45395
ENST00000393409	ENSG00000114554	PLXNA1	9066	protein_coding	mRNA	0.00599727	0.367318	1.50772	up	9.17122	9.55237	9.13491	16.0727	13.5247	13.9804
ENST00000393743	ENSG00000137628	DDX60	6071	protein_coding	mRNA	0.00168506	0.323137	7.00228	up	0.077279	0.082786	0.108023	9.02857	4.85273	6.61081
ENST00000393760	ENSG00000171307	ZDHHC16	2014	protein_coding	mRNA	0.000477278	0.175778	1.70718	up	0.855989	0.602806	1.20946	2.27119	2.15905	2.30762
ENST00000393792	ENSG00000168246	UBTD2	3301	protein_coding	mRNA	0.018361	0.370872	1.79302	up	11.9123	11.9349	1.71541	11.1689	11.7699	12.0845
ENST00000393997	ENSG00000102890	ELMO3	2531	protein_coding	mRNA	0.0172754	0.367318	1.81319	up	4.58093	8.4954	1.21225	8.36559	7.12841	6.47183
ENST00000394235	ENSG00000109381	ELF2	4012	protein_coding	mRNA	0.0159706	0.367318	1.36182	up	1.60804	2.16559	1.5336	2.91906	2.64233	2.60807
ENST00000394366	ENSG00000100650	SRSF5	1638	protein_coding	mRNA	0.00528664	0.367318	1.38879	up	1.19006	1.21248	1.66342	2.5145	2.08694	2.28668
ENST00000394532	ENSG00000002330	BAD	1157	protein_coding	mRNA	0.033203	0.506349	1.28121	up	3.99104	3.39991	2.70324	4.61903	4.24827	4.60619
ENST00000394705	ENSG00000119737	GPR75	2115	protein_coding	mRNA	0.0370447	0.534834	1.23034	up	0.559973	0.485527	0.414922	0.994893	0.739493	0.743376
ENST00000394836	ENSG00000167994	RAB3IL1	2284	protein_coding	mRNA	0.0230232	0.416524	1.46383	up	3.39683	2.59524	3.40397	5.05115	5.71669	4.49473
ENST00000394859	ENSG00000198720	ANKRD13B	3214	protein_coding	mRNA	0.0122366	0.367318	1.28421	up	2.73443	3.1943	2.95118	4.02517	3.90524	4.29718
ENST00000394888	ENSG00000149532	CPSF7	3650	protein_coding	mRNA	0.0117807	0.367318	1.42688	up	4.79903	5.07842	6.09609	9.03008	7.839	7.4321
ENST00000394901	ENSG00000167536	DHRS13	2037	protein_coding	mRNA	0.0371682	0.53572	1.41933	up	1.61797	1.13042	1.69007	3.06669	2.35068	2.23926
ENST00000394987	ENSG00000167173	C15orf39	4430	protein_coding	mRNA	0.0154059	0.367318	1.22895	up	6.87866	7.03047	6.51069	9.24747	8.19121	8.27989
ENST00000395068	ENSG00000178719	GRINA	1814	protein_coding	mRNA	0.0271532	0.453452	1.22843	up	39.2309	38.819	47.0501	50.7937	48.625	56.174
ENST00000395094	ENSG00000169955	ZNF747	3504	protein_coding	mRNA	0.00775178	0.367318	1.27162	up	0.171284	0.15797	0.169119	0.582067	0.44791	0.425725
ENST00000395097	ENSG00000119508	NR4A3	3794	protein_coding	mRNA	0.00766222	0.367318	1.49571	up	0.629156	0.678407	0.786068	1.66726	1.2935	1.70338
ENST00000395135	ENSG00000140464	PML	2199	protein_coding	mRNA	0.0298994	0.479069	1.73896	up	1.37347	0.776623	1.2734	2.77781	2.12868	3.37248
ENST00000395314	ENSG00000126777	KTN1	4618	protein_coding	mRNA	0.036498	0.530276	1.56219	up	5.71901	7.3688	6.06472	9.25228	12.6627	9.62909
ENST00000395343	ENSG00000101191	DIDO1	8477	protein_coding	mRNA	0.0291797	0.472092	1.22552	up	4.74669	4.90105	4.04474	6.30712	5.31119	5.67221
ENST00000395550	ENSG00000225697	SLC26A6	2589	protein_coding	mRNA	0.0496457	0.611054	1.39612	up	1.1655	0.877415	0.352922	1.43267	1.66351	1.17602
ENST00000395587	ENSG00000184110	EIF3C	3137	protein_coding	mRNA	0.0403458	0.557129	1.42575	up	16.0002	10.3724	30.6237	23.9579	25.9937	29.3443
ENST00000395593	ENSG00000079974	RABL2B	2341	protein_coding	mRNA	0.0219719	0.40771	1.24247	up	0.103154	0	0.058008	0.383896	0.233834	0.317131
ENST00000395694	ENSG00000164051	CCDC51	1560	protein_coding	mRNA	0.0219996	0.407859	1.60603	up	2.56386	2.32301	3.90812	5.49192	4.34423	6.36356
ENST00000395811	ENSG00000133030	MPRIP	10960	protein_coding	mRNA	0.000162736	0.105435	1.46037	up	3.8051	3.82218	4.1269	6.38048	6.04701	6.1872
ENST00000395819	ENSG00000124225	PMEPA1	859	protein_coding	mRNA	0.0228661	0.41506	1.26012	up	0.738098	0.897576	0.918095	1.46405	1.37585	1.17703
ENST00000395850	ENSG00000085063	CD59	1889	protein_coding	mRNA	0.0200404	0.387578	1.34297	up	16.974	17.0514	12.8255	20.6957	18.9572	23.0413
ENST00000395925	ENSG00000106571	GLI3	8208	protein_coding	mRNA	0.00248809	0.367318	1.55281	up	2.30019	2.16526	4.95965	5.45114	5.61692	5.03362
ENST00000396105	ENSG00000124201	ZNFX1	7371	protein_coding	mRNA	0.000268065	0.127459	1.58994	up	8.53048	8.42812	8.59632	14.0396	14.7175	13.6941
ENST00000396209	ENSG00000008394	MGST1	979	protein_coding	mRNA	0.0476789	0.599025	1.56797	up	1.8301	2.27305	4.41493	6.20904	4.52153	4.31694
ENST00000396212	ENSG00000103540	CCP110	5549	protein_coding	mRNA	0.0377672	0.539428	1.81097	up	3.3622	3.52255	1.90496	4.23382	7.72389	5.93711
ENST00000396988	ENSG00000008323	PLEKHG6	2963	protein_coding	mRNA	0.0158618	0.367318	2.58967	up	0.005155	0	0.002774	0.890807	1.77923	2.32052
ENST00000397174	ENSG00000010803	SCMH1	2977	protein_coding	mRNA	0.0235066	0.420857	1.53298	up	0.251312	0	0.293247	1.02634	0.86056	0.595257
ENST00000397195	ENSG00000007168	PAFAH1B1	5497	protein_coding	mRNA	0.00149753	0.30859	1.66499	up	8.56348	9.23653	8.81294	16.5004	15.2175	14.5819
ENST00000397278	ENSG00000100342	APOL1	2918	protein_coding	mRNA	0.0189128	0.376943	1.43539	up	0	0	0	0.489016	0.259935	0.576811
ENST00000397293	ENSG00000128284	APOL3	2214	protein_coding	mRNA	0.0276442	0.4582	1.22081	up	0	0	0	0.323037	0.142635	0.204535
ENST00000397341	ENSG00000100813	ACIN1	2738	protein_coding	mRNA	0.0217385	0.406215	2.3783	up	1.62706	0.870719	3.06623	7.01972	3.81165	6.77041
ENST00000397353	ENSG00000063854	HAGH	1257	protein_coding	mRNA	0.0447213	0.582256	1.71837	up	10.148	7.59126	12.6881	18.8776	22.6735	14.0437
ENST00000397570	ENSG00000185507	IRF7	1943	protein_coding	mRNA	0.00342561	0.367318	2.28147	up	0.131268	0.381337	0.211163	2.16384	1.54896	1.75979
ENST00000397574	ENSG00000185507	IRF7	1968	protein_coding	mRNA	0.000524031	0.186873	2.91773	up	1.86606	1.59466	1.51026	7.45349	6.36094	6.38168
ENST00000397588	ENSG00000153046	CDYL	2184	protein_coding	mRNA	0.0245845	0.430467	1.31345	up	9.65517	7.93141	9.36969	12.1422	11.4261	12.8991
ENST00000397938	ENSG00000182944	EWSR1	2654	protein_coding	mRNA	0.03673	0.532421	8.47817	up	0.220016	5.54533	1.86826	28.0525	15.2574	27.2407
ENST00000398090	ENSG00000003989	SLC7A2	7557	protein_coding	mRNA	0.00575976	0.367318	3.91084	up	0.471417	1.21187	0.408578	5.29421	4.09639	7.11341
ENST00000398193	ENSG00000187627	RGPD1	5498	protein_coding	mRNA	0.00110669	0.263102	1.64013	up	0	0	0.237154	0.686617	0.807434	0.851772
ENST00000398600	ENSG00000157601	MX1	3470	protein_coding	mRNA	0.00604957	0.367318	1.44704	up	0.490007	0.326267	0.462168	1.20465	1.05521	0.952552
ENST00000398692	ENSG00000173933	RBM4	921	protein_coding	mRNA	0.0297903	0.478161	1.54652	up	2.93986	3.11766	6.21876	6.21231	6.25324	8.07458
ENST00000398881	ENSG00000214736	TOMM6	595	protein_coding	mRNA	0.0146285	0.367318	3.94565	up	22.6569	29.7649	0.604784	44.6726	24.7365	37.5627
ENST00000399409	ENSG00000100949	RABGGTA	2265	protein_coding	mRNA	0.00849439	0.367318	2.08609	up	2.15082	3.7016	1.55997	5.00763	6.19136	6.36538
ENST00000399613	ENSG00000152520	PAN3	4940	protein_coding	mRNA	0.0183943	0.371049	1.68834	up	3.94609	4.95527	4.58088	9.65266	8.19233	7.08349
ENST00000399808	ENSG00000142089	IFITM3	808	protein_coding	mRNA	0.0143249	0.367318	6.18696	up	30.0197	72.7675	82.9716	317.182	333.267	454.822
ENST00000400000	ENSG00000101558	VAPA	6815	protein_coding	mRNA	0.0072477	0.367318	1.78677	up	4.50079	4.16434	9.14791	10.596	13.0015	10.2493
ENST00000400354	ENST00000400354	RP5-827A12.2-001	459	processed_pseudogene	lncRNA	0.00909534	0.367318	1.26867	up	0.895327	1.14655	0.953657	1.49268	1.56797	1.51294
ENST00000400790	ENSG00000049618	ARID1B	2887	protein_coding	mRNA	0.0250076	0.433784	1.21825	up	0	0	0.086954	0.307328	0.159722	0.314162
ENST00000400999	ENSG00000143450	OAZ3	891	protein_coding	mRNA	0.0203414	0.39072	1.4575	up	0	0.11613	0.041771	0.601092	0.344999	0.663203
ENST00000402554	ENSG00000166579	NDEL1	1858	protein_coding	mRNA	0.0157701	0.367318	1.73532	up	0.809164	1.29122	1.96722	3.10644	3.24451	2.89106
ENST00000402789	ENSG00000110066	KMT5B	1599	protein_coding	mRNA	0.00595556	0.367318	1.72428	up	0.335926	0.355966	1.22429	1.62164	1.7576	2.09374
ENST00000402966	ENSG00000184208	C22orf46	4975	protein_coding	mRNA	0.012236	0.367318	1.44379	up	0.608874	0.460359	0.064445	0.877709	0.865411	1.03172
ENST00000404395	ENSG00000168610	STAT3	2633	protein_coding	mRNA	0.0182047	0.36891	1.25804	up	2.10267	2.40806	2.05666	3.27761	2.87412	2.83703
ENST00000407464	ENSG00000169635	HIC2	6798	protein_coding	mRNA	0.00322711	0.367318	2.00256	up	0.04083	0.042148	1.29333	1.66208	1.8894	1.94666
ENST00000408483	ENSG00000221410	MIR1238	83	miRNA	ncRNA	0.0399794	0.554538	1.56206	up	0.033543	0.011165	0.002396	0.269657	0.774764	0.763452
ENST00000408968	ENSG00000185885	IFITM1	855	protein_coding	mRNA	0.00518479	0.367318	6.89953	up	7.33482	13.6003	10.1524	82.1225	54.6199	94.058
ENST00000409112	ENSG00000067066	SP100	2198	protein_coding	mRNA	0.0177014	0.367318	1.32059	up	0	0	0.010133	0.250015	0.465584	0.271241
ENST00000409319	ENSG00000158552	ZFAND2B	771	protein_coding	mRNA	0.0037645	0.367318	1.24844	up	0.045985	0.001018	0.058869	0.310578	0.243003	0.333409
ENST00000409334	ENSG00000198612	COPS8	794	protein_coding	mRNA	0.0446001	0.581816	1.40791	up	0.144531	0	1.30556	1.05468	0.737831	1.34267
ENST00000409341	ENSG00000067066	SP100	1898	protein_coding	mRNA	0.0488079	0.605839	3.41601	up	0.229108	2.42026	2.08369	7.30877	5.86997	8.3798
ENST00000409465	ENSG00000115415	STAT1	3097	protein_coding	mRNA	0.00557762	0.367318	2.37178	up	0.7549	0.743837	0.957107	4.18172	3.37069	2.60032
ENST00000409493	ENSG00000115274	INO80B	623	protein_coding	mRNA	0.0195645	0.382822	1.42915	up	0.543754	0.909096	0.428101	1.10368	1.5002	1.25176
ENST00000409652	ENSG00000221963	APOL6	10121	protein_coding	mRNA	0.0470527	0.594898	1.86462	up	0.009431	0.027042	0.018104	1.12569	0.372464	1.34632
ENST00000409735	ENSG00000105223	PLD3	2140	protein_coding	mRNA	0.047771	0.599525	2.21493	up	3.23857	6.43731	9.25992	14.3092	16.6967	13.056
ENST00000409784	ENSG00000138069	RAB1A	2447	protein_coding	mRNA	0.00223122	0.35747	1.37249	up	41.6527	46.8282	21.8365	47.0144	44.7719	47.9498
ENST00000409824	ENSG00000067066	SP100	1802	protein_coding	mRNA	0.0057522	0.367318	2.98431	up	0	0	0.660779	2.08806	3.63215	2.34306
ENST00000409991	ENSG00000160703	NLRX1	3716	protein_coding	mRNA	0.00648902	0.367318	2.38468	up	1.02944	0.82654	0	2.15422	2.4038	3.22123
ENST00000410007	ENSG00000163939	PBRM1	4905	protein_coding	mRNA	0.0148535	0.367318	1.7988	up	0.603567	0.397928	0.160968	1.61747	1.68363	1.0802
ENST00000410092	ENSG00000134278	SPIRE1	5533	protein_coding	mRNA	0.0377857	0.539628	1.24035	up	5.11692	5.36927	8.2818	7.54671	8.48666	8.05596
ENST00000411765	ENSG00000144504	ANKMY1	652	protein_coding	mRNA	0.0423946	0.569413	1.41585	up	0.357319	0	0.376612	0.894999	0.807818	0.605844
ENST00000412367	ENSG00000110931	CAMKK2	2006	protein_coding	mRNA	0.0326137	0.501608	1.20282	up	7.22431	6.88459	6.6156	9.15888	7.88673	8.45223
ENST00000412426	ENSG00000281903	AF127936.7	991	lincRNA	lncRNA	0.00917122	0.367318	1.21519	up	0.108847	0.140011	0.146866	0.402267	0.423665	0.30653
ENST00000412585	ENSG00000234745	HLA-B	1547	protein_coding	mRNA	0.00456423	0.367318	4.39309	up	4.02516	3.4152	2.98924	16.9741	14.4404	25.3986
ENST00000412908	ENSG00000100567	PSMA3	908	protein_coding	mRNA	0.0350118	0.519711	1.32273	up	8.63652	7.15672	13.9906	11.8769	13.8265	14.5998
ENST00000413000	ENSG00000072756	TRNT1	483	protein_coding	mRNA	0.0312551	0.490759	1.80707	up	0.057204	0	0.421486	1.77567	0.875285	0.802911
ENST00000414011	ENSG00000159111	MRPL10	1622	protein_coding	mRNA	0.0172132	0.367318	1.56508	up	0.309346	0	2.62973	2.02172	1.37035	2.08898
ENST00000414203	ENSG00000231467	RP5-1170K4.7	464	antisense	lncRNA	0.00599511	0.367318	1.24554	up	0	0	0	0.180062	0.271889	0.286674
ENST00000414584	ENSG00000222041	LINC00152	772	lincRNA	lncRNA	0.00507221	0.367318	1.46108	up	0.729177	0.548449	0.421217	1.28135	1.19758	1.32205
ENST00000414630	ENSG00000135164	DMTF1	627	protein_coding	mRNA	0.000776586	0.223636	1.78107	up	0	0	0	0.900534	0.768467	0.682179
ENST00000414706	ENSG00000130544	ZNF557	5736	protein_coding	mRNA	0.0469186	0.594018	1.21679	up	0.52704	0.246097	1.45918	1.29888	1.13532	0.897896
ENST00000415432	ENSG00000134215	VAV3	1293	protein_coding	mRNA	0.0485458	0.604106	1.39832	up	7.48426	7.04081	7.92755	9.60356	10.2305	13.163
ENST00000415816	ENSG00000068079	IFI35	1241	protein_coding	mRNA	0.0120195	0.367318	2.57859	up	0.39774	0	0.220527	2.92786	1.80393	1.70271
ENST00000416274	ENSG00000133740	E2F5	1728	protein_coding	mRNA	0.000893159	0.240491	1.65115	up	2.58059	3.12414	2.3543	5.09614	4.91771	5.02276
ENST00000417245	ENSG00000186765	FSCN2	1665	protein_coding	mRNA	0.0207513	0.396487	1.25983	up	0.625492	1.00004	0	0.89628	0.831921	0.692635
ENST00000417314	ENSG00000163376	KBTBD8	4680	protein_coding	mRNA	0.0435532	0.57638	1.48167	up	0.138325	0.384584	0.231703	1.18214	0.674732	0.71564
ENST00000417537	ENSG00000105835	NAMPT	300	protein_coding	mRNA	0.00664815	0.367318	1.24726	up	0.221037	0.110239	0.190255	0.487026	0.483028	0.428955
ENST00000417852	ENSG00000188191	PRKAR1B	651	protein_coding	mRNA	0.0211925	0.401024	1.22842	up	0.098673	0.134475	0	0.279278	0.245688	0.422597
ENST00000418049	ENSG00000233250	RP3-339A18.6	218	antisense	lncRNA	0.00600884	0.367318	1.4784	up	0.230786	0.001095	0.37543	0.725159	0.816245	0.819427
ENST00000418381	ENSG00000144357	UBR3	7951	protein_coding	mRNA	0.0187971	0.375379	1.48724	up	0.990389	0.712925	0.947659	1.884	2.08287	1.49002
ENST00000418622	ENSG00000107036	RIC1	6658	protein_coding	mRNA	0.0265574	0.448532	1.37738	up	0.622684	0.624097	0.452587	1.23704	1.33832	0.879512
ENST00000418663	ENSG00000205485	AC004980.7	2667	processed_transcript	lncRNA	0.000426934	0.165551	1.25745	up	1.65479	2.08535	0.762276	1.97581	1.96118	1.99922
ENST00000418988	ENSG00000129084	PSMA1	1266	protein_coding	mRNA	0.0288064	0.46982	3.6808	up	0.698712	1.8885	5.90534	17.1649	9.85035	9.17142
ENST00000419211	ENSG00000224746	AC015987.1	804	antisense	lncRNA	0.0389732	0.547207	1.29064	up	0.568305	0.539025	0.036773	0.823215	0.778483	0.556655
ENST00000419242	ENSG00000162600	OMA1	852	protein_coding	mRNA	0.0199281	0.386748	1.68647	up	0	0	0.831697	1.57926	0.862005	1.02032
ENST00000419916	ENSG00000157870	FAM213B	2749	protein_coding	mRNA	0.0119634	0.367318	1.93085	up	0.515033	0.737087	1.24588	3.23253	2.25589	2.24613
ENST00000420218	ENSG00000120899	PTK2B	3941	protein_coding	mRNA	0.030667	0.486048	1.29922	up	0	0	0	0.45562	0.197166	0.259941
ENST00000420282	ENSG00000213639	PPP1CB	570	protein_coding	mRNA	0.0406375	0.559226	1.30828	up	0.162627	0.111277	0.406953	0.449753	0.812737	0.603378
ENST00000420537	ENSG00000231993	EP300-AS1	457	antisense	lncRNA	0.00393026	0.367318	1.3763	up	0.234095	0.206265	0.437038	0.921261	0.709554	0.74567
ENST00000420694	ENSG00000225039	LINC01058	448	lincRNA	lncRNA	0.0140436	0.367318	1.36872	up	0.029475	0	0.109848	0.521854	0.293968	0.511406
ENST00000420967	ENSG00000111445	RFC5	559	protein_coding	mRNA	0.00614085	0.367318	1.22617	up	0	0	0	0.263395	0.251934	0.165944
ENST00000421124	ENSG00000204580	DDR1	800	protein_coding	mRNA	0.00957175	0.367318	1.23061	up	0.078467	0.137037	0.106074	0.393374	0.292065	0.401845
ENST00000421275	ENSG00000228350	CELSR3-AS1	196	antisense	ncRNA	0.0217206	0.406215	1.20504	up	0.166298	0.242078	0.340403	0.444129	0.576458	0.515032
ENST00000421365	ENSG00000115267	IFIH1	1617	protein_coding	mRNA	0.000921855	0.242135	1.34879	up	0.281709	0.273073	0.196132	0.719298	0.699495	0.622538
ENST00000422285	ENSG00000131828	PDHA1	3310	protein_coding	mRNA	0.000726002	0.216392	1.51819	up	11.8426	14.906	6.34652	15.4292	15.2792	16.527
ENST00000422660	ENSG00000136104	RNASEH2B	4830	protein_coding	mRNA	0.015158	0.367318	1.27575	up	0.39778	0.331504	0.293826	0.801819	0.587387	0.736616
ENST00000422890	ENSG00000071553	ATP6AP1	867	protein_coding	mRNA	0.0354264	0.522927	1.22112	up	0.567632	0.736558	0.252259	0.882559	0.898254	0.657422
ENST00000422972	ENSG00000226471	CTA-292E10.6	409	antisense	lncRNA	0.0309096	0.487944	1.49953	up	0.838976	0.45285	1.16261	1.92279	1.34016	2.00197
ENST00000423172	ENSG00000129255	MPDU1	888	protein_coding	mRNA	0.0213002	0.402363	1.2511	up	0	0.067999	0.277232	0.410174	0.469355	0.331402
ENST00000423517	ENSG00000186472	PCLO	17147	protein_coding	mRNA	0.0259066	0.442687	1.43742	up	1.17544	0.999878	0.110352	1.4605	1.36235	1.23697
ENST00000423978	ENST00000423978	TSSK5P-001	907	unitary_pseudogene	lncRNA	0.000677359	0.20979	1.22573	up	1.16357	1.11465	1.03464	1.60204	1.54964	1.56532
ENST00000424133	ENSG00000250251	PKD1P6	2493	processed_transcript	lncRNA	0.0361129	0.52864	1.72899	up	1.04179	0.932257	0.582619	3.02861	1.84442	1.72677
ENST00000424714	ENSG00000107959	PITRM1	482	protein_coding	mRNA	0.000695695	0.212179	1.50143	up	0	0	0	0.539832	0.536302	0.431169
ENST00000424736	ENST00000424736	RP11-512F24.1-001	1029	processed_pseudogene	lncRNA	0.0349972	0.519639	1.29726	up	1.3064	2.00535	0	1.07433	1.3197	1.66699
ENST00000424963	ENSG00000140153	WDR20	2695	protein_coding	mRNA	0.0164464	0.367318	1.39908	up	0.069652	0.157024	0.431918	0.829566	0.568073	0.758733
ENST00000425368	ENSG00000243649	CFB	2862	protein_coding	mRNA	0.00123318	0.275386	3.32405	up	10.2162	9.93603	9.2014	32.4464	31.0908	41.2541
ENST00000425441	ENSG00000160799	CCDC12	1097	protein_coding	mRNA	0.00632311	0.367318	5.79796	up	0.187858	2.03697	0	7.33786	7.45762	7.74557
ENST00000425611	ENSG00000173559	NABP1	1878	protein_coding	mRNA	0.00589491	0.367318	1.23126	up	0.41162	0.521128	0.333324	0.807038	0.711712	0.698627
ENST00000425753	ENSG00000104522	TSTA3	1362	protein_coding	mRNA	0.0336976	0.509803	1.4441	up	15.4948	19.4624	16.5877	27.5669	22.1651	25.6797
ENST00000427522	ENSG00000130589	HELZ2	7827	protein_coding	mRNA	0.000985321	0.246432	2.51048	up	7.61406	6.34025	7.23787	21.0351	19.0018	17.9117
ENST00000427587	ENSG00000118894	EEF2KMT	2390	protein_coding	mRNA	0.0224315	0.41078	1.2759	up	3.1318	2.92945	3.16246	4.60098	3.76692	4.29649
ENST00000428313	ENSG00000148120	C9orf3	2288	protein_coding	mRNA	0.0141109	0.367318	1.60589	up	0.025427	0	0.114685	0.444955	0.798658	0.8481
ENST00000428331	ENSG00000017260	ATP2C1	4795	protein_coding	mRNA	0.0107218	0.367318	2.47589	up	0.074349	0.378902	0.03182	1.19545	2.32353	2.06557
ENST00000428361	ENSG00000144579	CTDSP1	842	protein_coding	mRNA	0.00161492	0.320355	1.45577	up	1.01447	0.978632	0.513977	1.52577	1.60448	1.70743
ENST00000428670	ENSG00000070961	ATP2B1	7032	protein_coding	mRNA	0.0209547	0.398665	1.43873	up	6.28884	8.12788	5.30575	10.1749	8.56265	10.1486
ENST00000428704	ENSG00000116478	HDAC1	664	protein_coding	mRNA	0.0265611	0.448532	1.41948	up	0	0.211914	0	0.453468	0.679402	0.390002
ENST00000428850	ENST00000428850	E2F6P1-001	745	processed_pseudogene	lncRNA	0.00708049	0.367318	1.69236	up	0	0	1.484	1.36351	1.50834	1.3505
ENST00000428886	ENSG00000166340	TPP1	841	retained_intron	lncRNA	0.0452316	0.585654	1.24211	up	0	0.067939	0.03203	0.185828	0.25034	0.420205
ENST00000428963	ENSG00000166451	CENPN	971	protein_coding	mRNA	0.0084523	0.367318	1.26569	up	3.53195	3.69778	3.85501	5.08045	4.61259	5.18605
ENST00000429344	ENSG00000105298	CACTIN	3612	protein_coding	mRNA	0.0455308	0.587091	1.22055	up	2.67527	3.24255	2.9467	3.99141	3.95031	3.51096
ENST00000429897	ENSG00000242086	LINC00969	2131	lincRNA	lncRNA	0.00799478	0.367318	1.37832	up	1.02592	1.04122	0.934408	1.70843	1.98455	1.56977
ENST00000429976	ENSG00000168016	TRANK1	10481	protein_coding	mRNA	0.00950871	0.367318	1.341	up	0.830404	0.800328	0.907941	1.33444	1.43375	1.68958
ENST00000430350	ENSG00000171867	PRNP	2539	protein_coding	mRNA	0.00374501	0.367318	7.02007	up	0.254189	0.004496	0.01096	8.9848	4.25196	7.33847
ENST00000430533	ENSG00000138073	PREB	615	protein_coding	mRNA	0.0362333	0.529057	1.66945	up	0.864238	0.650411	0.361426	1.11573	2.00604	1.94575
ENST00000430683	ENSG00000225886	RP11-288L9.4	489	antisense	lncRNA	0.0108147	0.367318	2.74079	up	0	0.210361	0.077542	2.32309	1.24687	2.56725
ENST00000431294	ENSG00000230798	FOXD3-AS1	496	antisense	lncRNA	0.00914021	0.367318	1.23852	up	0.023305	0	0.084676	0.246604	0.367113	0.251772
ENST00000431361	ENSG00000229873	OGFR-AS1	668	antisense	lncRNA	0.00704512	0.367318	1.34997	up	0.371361	0.451455	0.176016	0.780072	0.655314	0.894833
ENST00000431446	ENSG00000147274	RBMX	2004	protein_coding	mRNA	0.0435982	0.576518	1.515	up	1.29726	1.22533	2.05888	3.33981	3.24939	2.10261
ENST00000431972	ENSG00000053770	AP5M1	1815	protein_coding	mRNA	0.0220265	0.407915	1.27562	up	0.005997	0.018297	0.74101	0.595027	0.527733	0.657039
ENST00000432259	ENSG00000164002	EXO5	688	protein_coding	mRNA	0.0450935	0.584371	1.29407	up	0	0	0	0.469866	0.261778	0.170046
ENST00000432561	ENSG00000072609	CHFR	2648	protein_coding	mRNA	0.0482132	0.602356	1.48848	up	2.21147	2.63671	0.979376	2.75998	4.10391	2.62258
ENST00000433751	ENSG00000104524	PYCRL	1000	protein_coding	mRNA	0.0172598	0.367318	1.20003	up	0	0	0.133983	0.346906	0.213362	0.224446
ENST00000433807	ENSG00000126217	MCF2L	557	protein_coding	mRNA	0.00394708	0.367318	1.47271	up	0.226856	0.443733	0.193285	0.890098	0.823483	0.915596
ENST00000434230	ENSG00000123562	MORF4L2	899	protein_coding	mRNA	0.0042085	0.367318	1.40888	up	0.376289	0.228215	0.417601	0.854307	0.997606	0.840278
ENST00000434237	ENSG00000226738	CTA-384D8.31	157	antisense	ncRNA	0.0267472	0.4503	1.54832	up	0.178945	0	0.103371	0.81371	0.861567	0.441932
ENST00000434444	ENSG00000204463	BAG6	766	protein_coding	mRNA	0.0328867	0.503549	1.27686	up	0.577793	0.499578	0.152652	0.695028	0.923327	0.664506
ENST00000434618	ENSG00000231925	TAPBP	3759	protein_coding	mRNA	0.0374443	0.537185	2.6816	up	15.1267	8.82442	5.07591	27.36	18.3855	29.5011
ENST00000434634	ENSG00000177082	WDR73	5387	protein_coding	mRNA	0.0141282	0.367318	1.73258	up	0.434486	0.075503	0.080524	1.01387	1.01815	1.10341
ENST00000434704	ENSG00000064195	DLX3	2602	protein_coding	mRNA	0.00786252	0.367318	1.27891	up	1.4145	0.887391	3.23293	2.48813	2.6953	2.51954
ENST00000434749	ENSG00000093167	LRRFIP2	718	protein_coding	mRNA	0.0181022	0.368307	1.32123	up	0.159388	0	0	0.403863	0.331076	0.420436
ENST00000434753	ENSG00000101966	XIAP	8415	protein_coding	mRNA	0.021888	0.407004	2.0859	up	0.112305	0	0.401413	1.70188	0.849384	1.97515
ENST00000435135	ENSG00000138031	ADCY3	1801	protein_coding	mRNA	0.000938515	0.242355	1.40255	up	4.67489	5.37681	3.60223	6.76236	6.40753	6.62977
ENST00000435225	ENSG00000115694	STK25	570	protein_coding	mRNA	0.00315125	0.367318	1.26535	up	0.220792	0.173765	0.108518	0.426303	0.514125	0.473094
ENST00000436063	ENSG00000067334	DNTTIP2	5897	protein_coding	mRNA	0.030077	0.480632	1.23716	up	3.4298	3.67851	2.85489	4.1226	3.95026	4.79662
ENST00000436198	ENSG00000129682	FGF13	1165	protein_coding	mRNA	0.00588654	0.367318	1.34377	up	0.090765	0.284702	0	0.479835	0.463275	0.520757
ENST00000436909	ENSG00000121274	PAPD5	4635	protein_coding	mRNA	0.00342062	0.367318	2.50781	up	0.041363	0.046235	2.61399	3.62386	2.9259	3.18032
ENST00000438020	ENSG00000135218	CD36	720	protein_coding	mRNA	0.0414498	0.564213	1.59081	up	0.82911	0.402918	0.97701	1.40082	1.65592	2.33392
ENST00000438224	ENSG00000122557	HERPUD2	811	protein_coding	mRNA	0.00809191	0.367318	1.30264	up	0.555948	0.784379	0.515393	1.12538	1.02393	1.12095
ENST00000438266	ENSG00000227495	AC109333.10	583	antisense	lncRNA	0.0446907	0.582175	1.23836	up	0.36211	0.245728	0.539314	0.607181	0.907333	0.665476
ENST00000438886	ENSG00000100823	APEX1	451	protein_coding	mRNA	0.0380584	0.541744	1.50244	up	0.938576	1.16054	0.699916	2.30375	1.38835	1.9649
ENST00000440234	ENSG00000132819	RBM38	686	protein_coding	mRNA	0.0325592	0.501166	1.41662	up	1.33061	0.884444	1.33235	2.47689	1.81424	2.05035
ENST00000440314	ENSG00000130038	CRACR2A	2697	protein_coding	mRNA	0.0142183	0.367318	2.22256	up	1.04386	1.79338	0.097742	3.34006	2.05523	3.54097
ENST00000440685	ENSG00000189171	S100A13	686	protein_coding	mRNA	0.000478091	0.175778	14.2701	up	0	0	0	10.4313	17.4026	12.7838
ENST00000441310	ENSG00000064933	PMS1	3225	protein_coding	mRNA	0.0326204	0.501608	1.2253	up	4.4881	4.18189	3.8176	5.56049	5.5197	4.80989
ENST00000441802	ENSG00000083857	FAT1	14786	protein_coding	mRNA	0.0303023	0.482555	1.22304	up	0.940451	0.980045	0.910873	1.5915	1.24805	1.29685
ENST00000441872	ENST00000441872	TXNP1-001	371	processed_pseudogene	lncRNA	0.00378095	0.367318	1.212	up	0.128645	0.059766	0.120672	0.317023	0.370215	0.329887
ENST00000442218	ENSG00000211584	SLC48A1	3010	protein_coding	mRNA	0.00784475	0.367318	2.01239	up	5.36605	5.38742	0.755407	6.43832	6.49058	7.47924
ENST00000442430	ENSG00000102096	PIM2	892	protein_coding	mRNA	0.00906155	0.367318	1.41661	up	0.341978	0.125196	0.556471	0.939881	0.781033	1.0194
ENST00000442440	ENSG00000232645	LINC01431	514	lincRNA	lncRNA	0.0193147	0.380952	1.44298	up	0	0.155879	0.068189	0.381269	0.648354	0.618817
ENST00000443253	ENSG00000114439	BBX	238	protein_coding	mRNA	0.0271831	0.453821	1.29841	up	0.137313	0	0.081084	0.279706	0.455102	0.452736
ENST00000443316	ENSG00000112078	KCTD20	406	processed_transcript	lncRNA	0.0414987	0.564317	1.24465	up	0.646335	0.542606	0.616108	1.06324	1.13936	0.801163
ENST00000443439	ENSG00000164307	ERAP1	4805	protein_coding	mRNA	0.0118326	0.367318	2.34159	up	1.06787	1.672	1.69339	5.37921	3.6839	5.49231
ENST00000444115	ENSG00000164054	SHISA5	2081	protein_coding	mRNA	0.0248694	0.433056	2.65385	up	0.927414	1.11713	0	4.97828	2.3851	2.36993
ENST00000444129	ENSG00000004700	RECQL	3702	protein_coding	mRNA	0.0384813	0.544267	1.39827	up	3.07933	2.90931	1.33171	4.0475	3.48769	3.12582
ENST00000444191	ENSG00000172534	HCFC1	3624	protein_coding	mRNA	0.027236	0.454424	1.3896	up	0.273596	0.235196	0.315144	0.985978	0.811479	0.558266
ENST00000444739	ENSG00000196954	CASP4	2158	protein_coding	mRNA	0.00873791	0.367318	1.22115	up	0.043938	0.021472	0.022361	0.197832	0.317018	0.256616
ENST00000445722	ENSG00000162521	RBBP4	580	protein_coding	mRNA	0.0499111	0.612427	1.2537	up	0	0	0	0.346458	0.109931	0.319389
ENST00000446492	ENSG00000231890	DARS-AS1	488	antisense	lncRNA	0.0113244	0.367318	1.21099	up	0	0	0	0.148435	0.214801	0.272229
ENST00000446647	ENSG00000009780	FAM76A	504	protein_coding	mRNA	0.00658592	0.367318	1.3127	up	0.167918	0.192581	0.152392	0.607961	0.435874	0.566253
ENST00000446686	ENSG00000232762	RP4-784A16.4	752	antisense	lncRNA	0.0394093	0.550333	1.26018	up	1.07995	1.14736	1.14423	1.97092	1.64136	1.4485
ENST00000447513	ENSG00000157911	PEX10	1997	protein_coding	mRNA	0.0175187	0.367318	1.43439	up	3.27593	3.37524	1.02739	3.485	4.08131	3.34433
ENST00000447906	ENSG00000164164	OTUD4	3829	protein_coding	mRNA	0.0340994	0.512477	1.20051	up	7.1267	7.35715	5.99372	8.93919	7.63796	8.32157
ENST00000447935	ENSG00000132792	CTNNBL1	778	protein_coding	mRNA	0.0246082	0.430563	1.22129	up	0.166828	0.254253	0.139548	0.498158	0.339171	0.497025
ENST00000448045	ENSG00000160746	ANO10	583	protein_coding	mRNA	0.0423787	0.569413	1.22029	up	0.05494	0.02456	0.027234	0.162811	0.253811	0.381103
ENST00000448120	ENSG00000078246	TULP3	3076	protein_coding	mRNA	0.0430746	0.573148	1.43134	up	2.73525	3.17392	1.48613	4.58568	3.23358	3.45502
ENST00000448729	ENSG00000230091	TMEM254-AS1	1899	antisense	lncRNA	0.0419415	0.567232	1.26731	up	0	0	0	0.364031	0.326512	0.125843
ENST00000449017	ENSG00000244625	MIATNB	583	lincRNA	lncRNA	0.0300068	0.480285	1.20675	up	0.166547	0.114557	0.092338	0.31746	0.461095	0.289109
ENST00000449070	ENSG00000115392	FANCL	964	protein_coding	mRNA	0.04969	0.611263	1.23737	up	0.175546	0.349556	0	0.273029	0.480811	0.528261
ENST00000449116	ENSG00000162105	SHANK2	939	protein_coding	mRNA	0.00311298	0.367318	1.26942	up	1.75919	2.01023	0.832534	1.92588	2.21754	2.06574
ENST00000449247	ENSG00000132305	IMMT	2670	protein_coding	mRNA	0.0461336	0.590757	1.47631	up	6.95829	5.85738	14.8858	12.3169	16.8096	12.3495
ENST00000449880	ENSG00000132470	ITGB4	5689	protein_coding	mRNA	0.0227369	0.413593	2.84821	up	0.061298	0.066828	0.135024	3.62854	1.27146	1.86475
ENST00000450048	ENSG00000060491	OGFR	553	protein_coding	mRNA	0.0275091	0.456845	2.0312	up	1.20568	0.776505	0.604314	3.52458	1.90675	2.90476
ENST00000450599	ENSG00000108654	DDX5	2077	protein_coding	mRNA	0.0331613	0.506228	2.46696	up	9.47034	4.08647	23.1644	37.1259	19.5077	29.6863
ENST00000450723	ENSG00000001630	CYP51A1	1729	protein_coding	mRNA	0.0340355	0.511954	2.86256	up	2.18045	2.69035	2.2004	14.4478	6.70521	6.3264
ENST00000450796	ENSG00000169599	NFU1	580	protein_coding	mRNA	0.0278129	0.459712	1.52334	up	0.000232	0.012205	0.231261	0.775345	0.850496	0.38631
ENST00000450982	ENSG00000186792	HYAL3	1402	protein_coding	mRNA	0.00988257	0.367318	1.32939	up	0	0	0.0863	0.278119	0.375065	0.470479
ENST00000452357	ENSG00000089127	OAS1	1990	protein_coding	mRNA	0.0131964	0.367318	1.4004	up	0	0.034927	0	0.446793	0.533886	0.276345
ENST00000452853	ENSG00000070087	PFN2	1780	protein_coding	mRNA	0.0396517	0.552363	1.23143	up	34.328	35.5043	36.0983	39.9702	47.6847	43.9424
ENST00000453153	ENSG00000138399	FASTKD1	2967	protein_coding	mRNA	0.0467855	0.593148	1.33233	up	1.8056	2.42128	2.72235	3.53745	3.60188	3.14507
ENST00000454061	ENSG00000214413	BBIP1	812	protein_coding	mRNA	0.0119276	0.367318	1.20077	up	0	0	0.25943	0.361757	0.332394	0.247684
ENST00000454394	ENSG00000140153	WDR20	2067	protein_coding	mRNA	0.0425179	0.570279	1.35093	up	0.078618	0.166583	0.613326	0.870854	0.539726	0.838952
ENST00000455559	ENSG00000134986	NREP	698	protein_coding	mRNA	0.0176139	0.367318	1.39595	up	0	0	0.231061	0.705893	0.390606	0.461447
ENST00000455605	ENSG00000171453	POLR1C	1882	retained_intron	lncRNA	0.022289	0.409862	1.51913	up	0.236498	0.397359	0.099328	0.644221	1.17089	0.804059
ENST00000455725	ENSG00000166181	API5	2257	protein_coding	mRNA	0.00514747	0.367318	2.38782	up	1.535	1.34726	0.713026	4.56413	3.25919	4.54925
ENST00000455785	ENSG00000117632	STMN1	1504	protein_coding	mRNA	0.00191028	0.336108	2.02392	up	11.8378	8.24514	40.1397	33.5975	35.632	38.9046
ENST00000455909	ENSG00000176826	FKBP9P1	2451	processed_transcript	lncRNA	0.0344541	0.515071	1.28404	up	0.770273	0.745362	0	0.829779	0.690949	0.931678
ENST00000455979	ENSG00000187634	SAMD11	1731	protein_coding	mRNA	0.00209712	0.347551	1.64066	up	1.8174	2.24764	0.515727	2.77666	2.53476	3.08788
ENST00000456939	ENSG00000101457	DNTTIP1	1073	protein_coding	mRNA	0.00188164	0.333658	1.6894	up	0	0	0.24318	0.968785	0.85928	0.697156
ENST00000457206	ENSG00000178385	PLEKHM3	3689	protein_coding	mRNA	0.0482648	0.602656	1.33428	up	0.106782	0.030507	0	0.563607	0.218	0.412217
ENST00000457257	ENSG00000225663	FAM195B	942	protein_coding	mRNA	0.0128742	0.367318	1.52565	up	0	0	0.215582	0.795458	0.43775	0.726927
ENST00000457805	ENSG00000184007	PTP4A2	1032	protein_coding	mRNA	0.0456308	0.587712	1.25749	up	2.16895	1.991	1.84022	2.73153	2.41921	3.1479
ENST00000457823	ENSG00000163104	SMARCAD1	4649	protein_coding	mRNA	0.0309995	0.488538	1.52379	up	1.17889	1.42288	0.410844	2.28991	1.43589	2.03447
ENST00000457853	ENSG00000203999	LINC01270	943	lincRNA	lncRNA	0.0108403	0.367318	1.29334	up	0.512836	0.447625	0.069771	0.724404	0.642221	0.701338
ENST00000458030	ENSG00000170634	ACYP2	1330	processed_transcript	lncRNA	0.00252726	0.367318	1.49113	up	0.081832	0.245584	0.084333	0.711827	0.680338	0.659191
ENST00000458392	ENSG00000232300	FAM215B	2183	lincRNA	lncRNA	0.0158394	0.367318	1.28245	up	0.651339	1.10009	0.147457	1.04234	0.98018	0.90704
ENST00000458395	ENSG00000121486	TRMT1L	735	protein_coding	mRNA	0.0445924	0.581816	1.23256	up	0.210663	0.27191	0.163902	0.628154	0.357771	0.501628
ENST00000458555	ENSG00000224969	RP11-54O7.11	471	antisense	lncRNA	0.0339224	0.511204	1.36002	up	0.141206	0.456228	0.191007	0.680196	0.609528	0.8045
ENST00000459774	ENSG00000178568	ERBB4	444	retained_intron	lncRNA	0.00519378	0.367318	1.39474	up	0.947819	0.953101	0.485701	1.44079	1.30837	1.60475
ENST00000460045	ENSG00000106348	IMPDH1	671	retained_intron	lncRNA	0.000920221	0.242135	1.33402	up	1.27812	1.42537	1.36011	2.15138	2.15853	2.10664
ENST00000460072	ENSG00000138050	THUMPD2	3148	retained_intron	lncRNA	0.00293142	0.367318	1.21809	up	0.49144	0.540664	0.658719	0.955359	0.875597	0.904279
ENST00000460138	ENSG00000239264	TXNDC5	2704	retained_intron	lncRNA	0.00659393	0.367318	1.50409	up	0.229924	0.149649	0.017244	0.694249	0.807682	0.561753
ENST00000460408	ENSG00000163918	RFC4	628	retained_intron	lncRNA	0.0450785	0.584371	1.31591	up	0.086692	0.154564	0.172828	0.567699	0.310928	0.641276
ENST00000460489	ENSG00000136147	PHF11	1077	processed_transcript	lncRNA	0.0478747	0.600037	1.25737	up	0.692578	0.693814	0.768953	1.4502	1.0346	1.03912
ENST00000460649	ENSG00000149485	FADS1	1559	protein_coding	mRNA	0.0157177	0.367318	1.30761	up	1.12906	1.36021	1.11765	1.95365	2.00115	1.65248
ENST00000460926	ENSG00000075651	PLD1	1012	processed_transcript	lncRNA	0.0228199	0.414569	1.78687	up	0	0	0.265905	0.89384	0.636645	1.41887
ENST00000461341	ENST00000461341	CPHL1P-001	3407	unitary_pseudogene	lncRNA	0.00652925	0.367318	1.25614	up	0.16134	0.20604	0.341639	0.551275	0.508392	0.62218
ENST00000461415	ENSG00000214160	ALG3	1017	retained_intron	lncRNA	0.0383439	0.543776	1.48104	up	1.36391	0.673535	1.08102	2.11498	1.96115	1.95172
ENST00000461614	ENSG00000142627	EPHA2	875	processed_transcript	lncRNA	0.0029932	0.367318	1.36326	up	0	0	0	0.317066	0.447276	0.328734
ENST00000461685	ENSG00000101040	ZMYND8	3567	protein_coding	mRNA	0.00575361	0.367318	1.67266	up	11.1443	9.93355	6.53893	15.4638	15.8624	14.8116
ENST00000462144	ENSG00000104774	MAN2B1	582	retained_intron	lncRNA	0.0214722	0.40402	1.21015	up	0.475101	0.619003	0.357611	0.888753	0.705337	0.743418
ENST00000462232	ENSG00000135899	SP110	567	processed_transcript	lncRNA	0.0467037	0.592863	1.42022	up	0	0.317027	0	0.447316	0.443312	0.750919
ENST00000462315	ENSG00000138496	PARP9	6769	protein_coding	mRNA	0.00902342	0.367318	1.837	up	1.09195	1.05416	1.18698	3.24019	2.26851	3.24547
ENST00000462317	ENSG00000185499	MUC1	1112	protein_coding	mRNA	0.0321434	0.497731	2.19214	up	1.01707	0.063271	2.81241	2.69581	3.94988	4.58216
ENST00000462707	ENSG00000105875	WDR91	533	retained_intron	lncRNA	0.0414747	0.564213	1.21346	up	0.166045	0.021626	0.229176	0.294168	0.468945	0.407316
ENST00000462875	ENSG00000204463	BAG6	972	retained_intron	lncRNA	0.0416672	0.565751	1.37724	up	0.274933	0.782861	0.170088	0.87481	0.952297	0.804527
ENST00000463125	ENSG00000087077	TRIP6	835	retained_intron	lncRNA	0.0426418	0.570509	1.26789	up	1.16872	1.44018	0.534696	1.20693	1.76209	1.53255
ENST00000463438	ENSG00000154781	CCDC174	751	retained_intron	lncRNA	0.0424434	0.569781	1.29802	up	0.515619	0.509736	0.188289	0.730065	0.630977	1.0265
ENST00000463472	ENSG00000177989	ODF3B	753	retained_intron	lncRNA	0.00494959	0.367318	1.37688	up	0.312236	0.192389	0.248318	0.646962	0.794169	0.728972
ENST00000463725	ENSG00000219545	UMAD1	559	antisense	lncRNA	0.0496985	0.611263	1.22819	up	1.76223	2.09595	2.12414	2.70617	2.41307	2.94148
ENST00000463764	ENSG00000168016	TRANK1	476	protein_coding	mRNA	0.0327862	0.502937	1.33148	up	0.28495	0.303252	0.365601	1.0052	0.675968	0.621788
ENST00000463852	ENSG00000086758	HUWE1	586	retained_intron	lncRNA	0.0363389	0.52964	1.35295	up	0.493129	0.870949	0.676291	1.35352	1.11537	1.31593
ENST00000463995	ENSG00000164062	APEH	1024	retained_intron	lncRNA	0.0277473	0.459322	1.48619	up	0.932617	0.62449	0.819986	1.99924	1.69917	1.34194
ENST00000464072	ENSG00000115415	STAT1	865	retained_intron	lncRNA	0.0436681	0.576881	1.40483	up	0.232398	0.212176	0.118926	0.967697	0.497444	0.554118
ENST00000464576	ENSG00000072135	PTPN18	393	retained_intron	lncRNA	0.000497695	0.180709	1.35373	up	0.216271	0.166807	0.416049	0.787394	0.681278	0.708437
ENST00000464628	ENSG00000213079	SCAF8	468	processed_transcript	lncRNA	0.0425261	0.570279	1.49631	up	0.590765	0.839132	0	1.44544	0.753786	1.09074
ENST00000464845	ENSG00000102030	NAA10	1772	protein_coding	mRNA	0.0343276	0.514197	4.1858	up	2.43004	1.02543	0.386687	13.1273	7.12974	4.66492
ENST00000465164	ENSG00000148672	GLUD1	503	processed_transcript	lncRNA	0.0226787	0.413162	1.64977	up	0	0	0.505715	0.932829	0.639526	1.27827
ENST00000465817	ENSG00000114790	ARHGEF26	2353	protein_coding	mRNA	0.00717371	0.367318	1.22929	up	0.077378	0.096863	0.03597	0.330465	0.361729	0.245159
ENST00000465842	ENSG00000100288	CHKB	428	retained_intron	lncRNA	0.00648655	0.367318	1.21331	up	1.07277	0.943823	0.982307	1.48537	1.3567	1.43587
ENST00000465860	ENSG00000107371	EXOSC3	509	retained_intron	lncRNA	0.0489709	0.606919	2.09418	up	0.32377	1.26412	1.10754	2.57102	2.40687	3.83907
ENST00000465878	ENSG00000140859	KIFC3	3225	protein_coding	mRNA	0.00196282	0.338395	1.69518	up	0	0.011221	0.238647	0.712959	0.906845	0.929518
ENST00000465939	ENSG00000163040	CCDC74A	1080	retained_intron	lncRNA	0.0236831	0.421713	1.56357	up	0.018592	0.265551	0.122213	0.541977	0.843376	0.926648
ENST00000466025	ENSG00000130810	PPAN	523	retained_intron	lncRNA	0.0234844	0.420551	1.23635	up	0	0.018974	0	0.177572	0.205996	0.352343
ENST00000466100	ENSG00000165280	VCP	508	retained_intron	lncRNA	0.0142897	0.367318	1.50183	up	0.397844	0.555415	0.840586	1.66104	1.38111	1.21244
ENST00000466174	ENSG00000167815	PRDX2	1717	retained_intron	lncRNA	0.0112206	0.367318	2.37039	up	1.19651	0.982159	0.910303	3.61077	5.07179	2.91225
ENST00000466424	ENSG00000164054	SHISA5	673	processed_transcript	lncRNA	0.0486187	0.60468	1.49384	up	0.30288	0.754925	0.863028	1.59699	1.50601	1.23818
ENST00000466532	ENSG00000092758	COL9A3	539	processed_transcript	lncRNA	0.0432959	0.574648	1.21259	up	0.056789	0.095297	0.000326	0.147669	0.314961	0.349195
ENST00000466710	ENSG00000067066	SP100	574	retained_intron	lncRNA	0.0421117	0.567964	1.22128	up	0	0.004454	0	0.34427	0.204509	0.130596
ENST00000466827	ENSG00000187634	SAMD11	542	retained_intron	lncRNA	0.00440471	0.367318	1.42321	up	0.927322	0.992751	1.13904	1.71956	1.87306	2.06899
ENST00000467148	ENSG00000130589	HELZ2	8064	protein_coding	mRNA	7.77042e-05	0.0895009	3.17425	up	7.5805	8.17072	8.48737	28.8735	26.6172	28.2078
ENST00000467164	ENSG00000141696	P3H4	723	retained_intron	lncRNA	0.0285758	0.467689	1.27705	up	0.40928	0.403952	0.295061	0.793818	0.869059	0.571503
ENST00000467249	ENSG00000096746	HNRNPH3	566	processed_transcript	lncRNA	0.0458193	0.588846	1.20711	up	3.456	3.05885	6.3394	5.52215	5.80714	4.75923
ENST00000467416	ENSG00000184867	ARMCX2	889	processed_transcript	lncRNA	0.0488881	0.606206	1.22501	up	0.177634	0.209706	7.5e-05	0.246473	0.3466	0.513863
ENST00000467712	ENSG00000169972	PUSL1	877	protein_coding	mRNA	0.0267252	0.450224	1.32615	up	0	0	0.025702	0.212085	0.4893	0.329331
ENST00000467816	ENSG00000187514	PTMA	378	retained_intron	lncRNA	0.0253171	0.436788	1.28644	up	1.21138	1.32532	2.17027	2.38249	2.09032	2.49928
ENST00000467847	ENSG00000169871	TRIM56	581	protein_coding	mRNA	0.0485129	0.604009	1.21597	up	1.16348	1.54195	1.4045	1.91999	1.74969	1.95923
ENST00000467860	ENSG00000160741	CRTC2	573	retained_intron	lncRNA	0.0223834	0.410647	1.31745	up	0.624236	0.509518	0.330014	0.951911	0.788981	1.08459
ENST00000467891	ENSG00000188130	MAPK12	2019	retained_intron	lncRNA	0.0312991	0.491101	1.24089	up	0.129378	0.372732	0	0.335255	0.433855	0.484134
ENST00000467905	ENSG00000004455	AK2	880	protein_coding	mRNA	0.0223386	0.410209	1.23225	up	0.084917	0	0.530529	0.418571	0.605197	0.45437
ENST00000468245	ENSG00000112249	ASCC3	1227	retained_intron	lncRNA	0.00743045	0.367318	1.20713	up	0.052858	0.114088	0.189897	0.329593	0.360831	0.374979
ENST00000468377	ENSG00000244300	GATA2-AS1	1578	antisense	lncRNA	0.00220454	0.355994	1.23021	up	0.090639	0.120783	0.079337	0.362687	0.303004	0.377103
ENST00000468607	ENSG00000005483	KMT2E	558	retained_intron	lncRNA	0.0242151	0.42645	1.35806	up	0.264253	0.33616	1.35991	1.15708	1.30592	1.20524
ENST00000468650	ENSG00000163040	CCDC74A	762	retained_intron	lncRNA	0.00514415	0.367318	1.33959	up	0.293803	0.055539	0.972967	0.886926	0.870932	1.00747
ENST00000468686	ENSG00000161179	YDJC	1423	retained_intron	lncRNA	0.0498018	0.611775	1.24456	up	2.01518	2.00452	1.08336	2.50864	1.9643	2.30001
ENST00000469004	ENSG00000083223	ZCCHC6	625	processed_transcript	lncRNA	0.000372757	0.155824	1.20348	up	0.290149	0.315043	0.362292	0.590489	0.601663	0.591982
ENST00000469137	ENSG00000104863	LIN7B	1057	retained_intron	lncRNA	0.0142179	0.367318	1.62885	up	0.53002	0.620256	0.824733	1.91219	1.95919	1.32098
ENST00000469266	ENSG00000188313	PLSCR1	1257	retained_intron	lncRNA	0.0262926	0.446608	1.51216	up	1.30539	1.41142	0.920802	2.7831	1.82294	2.34531
ENST00000469309	ENSG00000214022	REPIN1	910	retained_intron	lncRNA	0.00549619	0.367318	1.44769	up	1.03917	1.17596	1.55223	2.50697	2.21034	2.14369
ENST00000469408	ENSG00000091127	PUS7	2356	protein_coding	mRNA	0.030284	0.482337	1.22915	up	9.43124	8.78581	10.6245	13.3497	11.8858	11.2236
ENST00000469568	ENSG00000141741	MIEN1	825	retained_intron	lncRNA	0.0267711	0.450327	1.26826	up	0.218396	0.0971	0.295185	0.496764	0.440653	0.672681
ENST00000469663	ENSG00000143799	PARP1	542	processed_transcript	lncRNA	0.0433814	0.57525	1.31935	up	0.227924	0.058256	0.187588	0.362727	0.598857	0.642583
ENST00000469673	ENSG00000185721	DRG1	677	retained_intron	lncRNA	0.0475567	0.598304	1.5309	up	0.249256	0.503457	0.964785	1.71907	1.52036	1.03887
ENST00000469840	ENSG00000163535	SGOL2	793	processed_transcript	lncRNA	0.0487653	0.605551	1.64652	up	0.034107	0	0	0.564389	0.36986	1.14845
ENST00000469876	ENSG00000142794	NBPF3	981	processed_transcript	lncRNA	0.0304885	0.484393	1.33034	up	0.205864	0.002039	0.021251	0.45626	0.348644	0.470232
ENST00000470006	ENSG00000213672	NCKIPSD	814	retained_intron	lncRNA	0.0454251	0.586462	1.44995	up	0.494069	0.875838	0.590779	1.49662	1.04851	1.61895
ENST00000470063	ENSG00000204406	MBD5	324	processed_transcript	lncRNA	0.0466596	0.592769	2.78713	up	0	0	0.545616	3.60652	0.926605	3.05647
ENST00000470269	ENSG00000137845	ADAM10	1693	retained_intron	lncRNA	0.0375787	0.538123	1.20264	up	0.509253	0.566275	0.018136	0.606669	0.665151	0.463266
ENST00000470434	ENSG00000100241	SBF1	2139	retained_intron	lncRNA	0.0182877	0.369792	1.40455	up	0.020947	0.16487	0.077221	0.577837	0.623673	0.37812
ENST00000470475	ENSG00000142937	RPS8	981	processed_transcript	lncRNA	0.0221564	0.408833	1.52423	up	2.9525	3.07402	2.3353	3.79954	5.31682	5.0732
ENST00000470515	ENSG00000059378	PARP12	564	processed_transcript	lncRNA	0.046477	0.592349	1.4239	up	0.030182	0.112929	0.122422	0.603393	0.310296	0.778037
ENST00000470611	ENSG00000171824	EXOSC10	401	processed_transcript	lncRNA	0.0482269	0.602372	1.22548	up	0	0	0.142299	0.441607	0.213219	0.229413
ENST00000470718	ENSG00000092010	PSME1	476	processed_transcript	lncRNA	0.0407453	0.55994	2.19128	up	0.45527	0.864148	1.16796	2.31185	2.42475	4.64824
ENST00000470779	ENSG00000143537	ADAM15	381	processed_transcript	lncRNA	0.0176506	0.367318	1.4204	up	0.506429	0.60276	1.08282	1.54472	1.23337	1.65376
ENST00000470821	ENSG00000114098	ARMC8	1656	protein_coding	mRNA	0.0153536	0.367318	1.32349	up	1.64441	1.50497	2.19718	2.94505	2.35807	2.84606
ENST00000471180	ENSG00000168237	GLYCTK	992	protein_coding	mRNA	0.00413454	0.367318	1.36258	up	0.030592	0	0.08977	0.399489	0.515737	0.355831
ENST00000471222	ENSG00000243550	LINC01214	335	lincRNA	lncRNA	0.00192593	0.336794	1.37525	up	0.087291	0.128851	0.198324	0.511272	0.620092	0.579983
ENST00000471276	ENSG00000182796	TMEM198B	1958	processed_transcript	lncRNA	0.0132723	0.367318	1.4988	up	0.052901	0	0.863084	0.843123	1.1716	0.818226
ENST00000471328	ENSG00000177706	FAM20C	554	processed_transcript	lncRNA	0.0103445	0.367318	1.21931	up	0.711618	0.662666	0.755492	1.03717	1.21343	1.02263
ENST00000471642	ENSG00000132676	DAP3	1671	protein_coding	mRNA	0.0480499	0.601101	2.53892	up	2.83166	1.77991	1.17344	5.25557	4.24746	9.89643
ENST00000471785	ENSG00000138496	PARP9	3040	protein_coding	mRNA	0.0135202	0.367318	7.90616	up	0.098324	0	0.561967	14.1101	3.92547	11.2308
ENST00000471840	ENSG00000142606	MMEL1	552	protein_coding	mRNA	0.0234149	0.419933	1.61949	up	0.50048	0.22341	0.60436	0.996749	1.45817	1.63016
ENST00000472004	ENSG00000104812	GYS1	578	retained_intron	lncRNA	0.010924	0.367318	1.40118	up	0.282919	0.240453	0	0.583768	0.511656	0.762775
ENST00000472191	ENSG00000183570	PCBP3	318	processed_transcript	lncRNA	0.0333461	0.507441	1.38992	up	0.371813	0.075704	0.154465	0.684013	0.71303	0.584425
ENST00000472252	ENSG00000161249	DMKN	593	protein_coding	mRNA	0.000467112	0.174904	1.87917	up	0.474018	0.42175	0.407247	1.53754	1.73129	1.81207
ENST00000473525	ENSG00000147140	NONO	1430	processed_transcript	lncRNA	0.001813	0.330644	1.56058	up	3.31635	2.71269	4.15363	6.21253	5.97866	5.52684
ENST00000473645	ENSG00000114209	PDCD10	1360	protein_coding	mRNA	0.00630357	0.367318	1.34271	up	5.22106	6.11585	4.4368	7.0037	7.01107	7.75833
ENST00000473954	ENSG00000204569	PPP1R10	470	processed_transcript	lncRNA	0.00431364	0.367318	1.41273	up	0.124578	0.084417	0.289322	0.788769	0.631392	0.560455
ENST00000474079	ENSG00000196498	NCOR2	321	retained_intron	lncRNA	0.029227	0.472595	1.43085	up	0.28956	0.144626	0.082979	0.822021	0.464645	0.730175
ENST00000474147	ENSG00000153250	RBMS1	2854	retained_intron	lncRNA	0.0248815	0.433112	1.20076	up	0.171349	0.316211	0.174065	0.40829	0.528981	0.436915
ENST00000474165	ENSG00000144815	NXPE3	936	protein_coding	mRNA	0.0186156	0.373496	2.35835	up	0.278489	0	0.277326	2.73682	1.60726	1.26532
ENST00000474188	ENSG00000010322	NISCH	564	retained_intron	lncRNA	0.000544004	0.191004	1.45126	up	0.250626	0.304561	0.221012	0.799613	0.776586	0.888089
ENST00000474629	ENSG00000173193	PARP14	7915	protein_coding	mRNA	0.00238279	0.366503	4.60477	up	3.43353	3.75589	3.57348	26.617	16.8785	18.0705
ENST00000474766	ENSG00000214193	SH3D21	2043	processed_transcript	lncRNA	0.0164668	0.367318	1.62033	up	7.8e-05	0.001007	0	0.375298	0.68465	0.834704
ENST00000475085	ENSG00000115204	MPV17	503	retained_intron	lncRNA	0.0135912	0.367318	1.33573	up	0.15256	0.129686	0.232163	0.520035	0.724213	0.477455
ENST00000475136	ENSG00000159166	LAD1	331	processed_transcript	lncRNA	0.0404089	0.55736	1.21171	up	0.255719	0.247959	0.445981	0.561454	0.756281	0.504502
ENST00000475468	ENSG00000138326	RPS24	623	processed_transcript	lncRNA	0.0096793	0.367318	1.7735	up	1.5715	1.58339	0.996643	2.94033	2.69697	3.87094
ENST00000475633	ENSG00000084764	MAPRE3	1160	retained_intron	lncRNA	0.0286582	0.468206	1.23282	up	0.995438	0.966963	0.379835	1.24497	1.0187	1.11464
ENST00000475653	ENSG00000156976	EIF4A2	909	retained_intron	lncRNA	0.00821294	0.367318	1.85121	up	0.860339	1.06065	0.452197	1.72281	2.67389	2.34909
ENST00000476185	ENSG00000160813	PPP1R35	474	processed_transcript	lncRNA	0.0398173	0.553406	1.95091	up	1.83206	4.06611	2.30153	5.98208	6.6938	5.29617
ENST00000476333	ENSG00000231925	TAPBP	726	retained_intron	lncRNA	0.0198892	0.386243	1.34639	up	0.480422	0.251063	0.946267	1.03743	1.32557	0.97604
ENST00000476691	ENSG00000164885	CDK5	726	retained_intron	lncRNA	0.0169953	0.367318	1.22345	up	0.171094	0.255477	0.028184	0.386216	0.480022	0.311381
ENST00000476754	ENSG00000100376	FAM118A	675	processed_transcript	lncRNA	0.024391	0.42865	1.48759	up	0.205649	0.15214	0.000131	0.890983	0.621201	0.457054
ENST00000476918	ENSG00000114315	HES1	1009	retained_intron	lncRNA	0.0362694	0.529395	1.40549	up	1.89257	1.46897	1.74372	2.57463	2.5221	3.35646
ENST00000476993	ENSG00000179403	VWA1	4511	protein_coding	mRNA	0.00683566	0.367318	1.3108	up	7.64368	6.72959	7.64582	9.64233	10.4057	9.84796
ENST00000477522	ENSG00000138496	PARP9	3128	protein_coding	mRNA	0.000888942	0.239894	3.60733	up	2.7263	3.13818	3.85638	15.4415	15.5496	12.3375
ENST00000477612	ENSG00000092758	COL9A3	635	processed_transcript	lncRNA	0.0402583	0.556629	1.21942	up	0	0.219865	0	0.291189	0.289842	0.299415
ENST00000477706	ENSG00000072506	HSD17B10	556	processed_transcript	lncRNA	0.00144479	0.303731	1.42926	up	0.837277	0.75924	0.770953	1.60066	1.63143	1.43988
ENST00000477773	ENSG00000058453	CROCC	648	processed_transcript	lncRNA	0.0196986	0.38412	1.34755	up	0.132524	0.080911	0	0.375669	0.345138	0.594053
ENST00000477777	ENSG00000102178	UBL4A	629	processed_transcript	lncRNA	0.0436056	0.576518	1.42795	up	0.996626	0.291784	1.84121	1.71402	1.96648	1.94067
ENST00000477955	ENSG00000081026	MAGI3	890	processed_transcript	lncRNA	0.0390086	0.547388	1.88073	up	0.051118	0.398584	0	1.76095	0.76407	0.935606
ENST00000478045	ENSG00000122515	ZMIZ2	3549	retained_intron	lncRNA	0.00960148	0.367318	1.27141	up	1.51676	1.34278	1.20165	2.00486	1.85171	2.07154
ENST00000478630	ENSG00000044090	CUL7	749	processed_transcript	lncRNA	0.0173626	0.367318	1.34039	up	0.149138	0.164764	0.191162	0.73359	0.537946	0.447832
ENST00000478641	ENSG00000127054	CPSF3L	3079	retained_intron	lncRNA	0.0145816	0.367318	1.2186	up	0.651532	0.579193	0.649271	1.00321	1.08608	0.871756
ENST00000478653	ENSG00000142794	NBPF3	1417	processed_transcript	lncRNA	0.0352204	0.521259	1.48263	up	0.857649	0.760257	0.220613	1.42592	1.56281	0.968602
ENST00000478863	ENSG00000129347	KRI1	2545	retained_intron	lncRNA	0.0414324	0.564204	1.88593	up	0.400852	1.08035	0.661259	2.62235	2.49829	1.52578
ENST00000478941	ENSG00000055044	NOP58	508	retained_intron	lncRNA	0.0184678	0.371916	1.39354	up	0.556328	0.971189	0.174288	0.876825	1.22525	1.17139
ENST00000479009	ENSG00000162889	MAPKAPK2	749	processed_transcript	lncRNA	0.00545429	0.367318	1.23301	up	0.829141	0.890246	0.916197	1.22212	1.34493	1.39159
ENST00000479540	ENSG00000130589	HELZ2	3079	processed_transcript	lncRNA	0.00482899	0.367318	2.17512	up	1.54512	1.63281	1.42669	5.15651	4.82652	3.61818
ENST00000479687	ENSG00000124333	VAMP7	742	processed_transcript	lncRNA	0.0234311	0.420161	1.53025	up	0.524046	0.3516	0.794806	1.2129	1.20392	1.82309
ENST00000479736	ENSG00000065150	IPO5	668	retained_intron	lncRNA	0.0327625	0.502762	1.31094	up	0.114707	0.111959	0.099821	0.529817	0.56122	0.284323
ENST00000479941	ENSG00000168397	ATG4B	374	retained_intron	lncRNA	0.0310364	0.48894	1.22498	up	0.620364	0.560944	0.196275	0.854545	0.700251	0.687858
ENST00000480592	ENSG00000215301	DDX3X	1001	processed_transcript	lncRNA	0.0260476	0.443958	1.32185	up	3.21635	4.36463	2.2508	4.75528	4.07506	4.43379
ENST00000480683	ENSG00000156113	KCNMA1	1046	protein_coding	mRNA	0.0248381	0.432699	1.5243	up	0	0	0	0.509602	0.780138	0.31802
ENST00000480897	ENSG00000143740	SNAP47	2375	processed_transcript	lncRNA	0.0433812	0.57525	1.44253	up	0.761641	1.48563	0.373596	1.26662	1.88702	1.54938
ENST00000480925	ENSG00000095380	NANS	649	processed_transcript	lncRNA	0.0386437	0.545253	1.69198	up	1.07796	0.500204	0.282777	1.95705	1.46278	1.55386
ENST00000480945	ENSG00000197312	DDI2	10625	protein_coding	mRNA	0.0268931	0.450928	1.29765	up	5.64616	6.2868	1.428	5.12589	5.09673	4.79362
ENST00000481043	ENSG00000163389	POGLUT1	424	retained_intron	lncRNA	0.0215956	0.405748	1.46927	up	0	0	0	0.336659	0.704491	0.390938
ENST00000481120	ENSG00000130702	LAMA5	386	retained_intron	lncRNA	0.00330689	0.367318	1.36473	up	0.539356	0.702868	0.654877	1.25952	1.19331	1.22643
ENST00000481504	ENST00000481504	HS6ST1P1-001	1234	processed_pseudogene	lncRNA	0.00366518	0.367318	3.0693	up	0	0	2.83703	4.47321	3.46016	4.64459
ENST00000481698	ENST00000481698	CA15P1-001	905	unitary_pseudogene	lncRNA	0.0117906	0.367318	1.22752	up	0.482413	0.350533	0.449432	0.70686	0.825308	0.733736
ENST00000482652	ENSG00000196236	XPNPEP3	1418	processed_transcript	lncRNA	0.0409187	0.560713	1.42147	up	0.681402	1.28052	0.071218	1.47532	1.19149	0.958649
ENST00000482665	ENSG00000185615	PDIA2	1956	retained_intron	lncRNA	0.00560939	0.367318	1.25169	up	0.563204	0.456496	0.450071	0.833856	0.833114	0.917373
ENST00000482732	ENSG00000147403	RPL10	1731	retained_intron	lncRNA	0.025291	0.436526	1.35162	up	1.39235	1.53976	1.48113	2.74651	2.0593	2.24924
ENST00000482880	ENSG00000005448	WDR54	1026	retained_intron	lncRNA	0.0250996	0.434442	1.78112	up	0	0.421078	0.000111	0.8328	1.3328	0.805941
ENST00000482886	ENSG00000243649	CFB	481	retained_intron	lncRNA	0.0194064	0.381446	1.53476	up	0.373912	0.237733	0.659626	1.1842	0.924962	1.52981
ENST00000482975	ENSG00000143977	SNRPG	1093	protein_coding	mRNA	0.0146274	0.367318	1.92608	up	0.438544	0	0.124822	1.20653	1.39738	1.18612
ENST00000483215	ENSG00000172766	NAA16	448	processed_transcript	lncRNA	0.0464081	0.592043	1.20042	up	0.156907	0.106958	0.092352	0.304524	0.465721	0.2598
ENST00000484194	ENSG00000204592	HLA-E	726	retained_intron	lncRNA	0.0180745	0.36821	1.33746	up	0.309271	0.289627	0.629987	1.11486	0.833826	0.763619
ENST00000484219	ENSG00000196975	ANXA4	338	processed_transcript	lncRNA	0.0293386	0.473819	1.27274	up	0.000497	0.052669	0.154263	0.502895	0.334952	0.272431
ENST00000484372	ENSG00000144028	SNRNP200	581	retained_intron	lncRNA	0.00934423	0.367318	1.30759	up	0.588689	0.728959	0.030415	0.89828	0.810968	0.701989
ENST00000484435	ENSG00000158286	RNF207	551	retained_intron	lncRNA	0.000456823	0.172671	1.67872	up	0.282035	0.376785	0.348184	1.17546	1.25092	1.29883
ENST00000484509	ENSG00000100068	LRP5L	608	retained_intron	lncRNA	0.0191212	0.378875	1.3399	up	0.252497	0.109939	0.0652	0.63129	0.471916	0.465845
ENST00000484542	ENSG00000160145	KALRN	487	retained_intron	lncRNA	0.0379498	0.540924	1.27106	up	0	0.035526	0	0.179505	0.433941	0.251432
ENST00000484560	ENSG00000188313	PLSCR1	629	processed_transcript	lncRNA	0.0188786	0.376503	1.21988	up	0.099598	0.176205	0.207226	0.491998	0.421502	0.347382
ENST00000484667	ENSG00000188290	HES4	667	protein_coding	mRNA	0.0249865	0.433784	1.35583	up	0.435107	0.43271	0.800364	0.923256	1.11269	1.35285
ENST00000484676	ENSG00000041988	THAP3	879	processed_transcript	lncRNA	0.0182368	0.36936	1.4416	up	0	0.084168	0	0.296555	0.561801	0.587677
ENST00000484693	ENSG00000137312	FLOT1	1001	retained_intron	lncRNA	0.017712	0.367318	1.70474	up	2.19713	1.56334	1.10932	3.17176	3.09026	3.80726
ENST00000484786	ENSG00000182606	TRAK1	2008	protein_coding	mRNA	0.041184	0.56258	1.24928	up	0.383439	0.232599	0.247868	0.53549	0.74873	0.53852
ENST00000485465	ENSG00000115561	CHMP3	920	processed_transcript	lncRNA	0.0437435	0.577305	1.29392	up	0.246735	0.356565	0.107076	0.522675	0.441889	0.79485
ENST00000485539	ENSG00000158286	RNF207	1413	retained_intron	lncRNA	0.00480663	0.367318	1.34767	up	0.436906	0.601515	0.377693	0.99849	1.02896	0.878715
ENST00000485677	ENSG00000163050	ADCK3	449	processed_transcript	lncRNA	0.0183945	0.371049	1.2177	up	0	0	0.125789	0.354648	0.282816	0.193036
ENST00000485682	ENSG00000184281	TSSC4	979	protein_coding	mRNA	0.045384	0.586462	1.2788	up	2.83764	2.54744	2.33116	4.07731	3.27792	3.31014
ENST00000485773	ENSG00000115657	ABCB6	962	retained_intron	lncRNA	0.0434631	0.575696	1.4182	up	1.46236	1.19764	0.636039	1.49108	2.17164	2.02606
ENST00000485804	ENSG00000106723	SPIN1	814	processed_transcript	lncRNA	0.0352337	0.521391	1.26327	up	0	0	0.239277	0.273027	0.342916	0.511421
ENST00000485806	ENSG00000136856	SLC2A8	971	processed_transcript	lncRNA	0.0232146	0.418553	1.31234	up	0.453221	0.5088	0.185423	0.954138	0.773674	0.635171
ENST00000485880	ENSG00000115840	SLC25A12	552	retained_intron	lncRNA	0.00739538	0.367318	1.26452	up	0.116674	0.052055	0.086927	0.37714	0.434791	0.309696
ENST00000486126	ENSG00000241945	PWP2	583	processed_transcript	lncRNA	0.00474902	0.367318	1.3694	up	0.098197	0.162627	0.028017	0.523725	0.559297	0.395306
ENST00000486144	ENSG00000140264	SERF2	1030	retained_intron	lncRNA	0.00522674	0.367318	1.25044	up	4.2129	4.21538	3.86272	5.22886	5.68174	5.14031
ENST00000486193	ENSG00000101182	PSMA7	548	processed_transcript	lncRNA	0.0288741	0.469908	1.33822	up	2.05694	2.33433	1.20897	2.95132	2.27753	2.91917
ENST00000486200	ENSG00000100503	NIN	465	processed_transcript	lncRNA	0.0153247	0.367318	1.39359	up	0.603172	0.82613	0.346379	1.36727	0.986986	1.17571
ENST00000486335	ENSG00000135637	CCDC142	566	retained_intron	lncRNA	0.0320829	0.49737	1.25295	up	0	0.042901	0.290542	0.436951	0.286485	0.485439
ENST00000486666	ENSG00000117625	RCOR3	4086	retained_intron	lncRNA	0.0414127	0.563999	1.39458	up	0.113223	0.019924	0.17163	0.316877	0.709981	0.628487
ENST00000486705	ENSG00000175110	MRPS22	598	retained_intron	lncRNA	0.00594314	0.367318	1.35188	up	0.460303	0.3171	0.560611	1.02164	1.03348	0.844765
ENST00000486927	ENSG00000119787	ATL2	553	processed_transcript	lncRNA	0.0123673	0.367318	1.20075	up	0.070829	0.146984	0.093011	0.329553	0.269031	0.371623
ENST00000487162	ENSG00000025708	TYMP	2049	retained_intron	lncRNA	0.0413254	0.563482	1.42294	up	0.47958	0.980025	0.198001	1.36326	0.903425	1.10671
ENST00000487285	ENSG00000126790	L3HYPDH	700	protein_coding	mRNA	0.00520515	0.367318	1.33963	up	0.133357	0.21101	0.079786	0.600573	0.439101	0.524448
ENST00000487296	ENSG00000168394	TAP1	1031	retained_intron	lncRNA	0.0129862	0.367318	1.42263	up	0.167801	0.033	0.109036	0.552286	0.459334	0.708954
ENST00000487300	ENSG00000116649	SRM	611	protein_coding	mRNA	0.0136218	0.367318	1.55682	up	0.537208	0.292481	0	0.881142	0.937861	0.955568
ENST00000487389	ENSG00000188313	PLSCR1	1443	protein_coding	mRNA	0.0144371	0.367318	1.61581	up	1.00709	0.988751	0.889764	2.43993	1.69163	2.40975
ENST00000487418	ENSG00000128928	IVD	1809	protein_coding	mRNA	0.0110809	0.367318	1.68122	up	13.0158	14.2451	3.92511	15.6466	16.3238	13.5281
ENST00000487509	ENSG00000089280	FUS	4920	retained_intron	lncRNA	0.00261915	0.367318	1.26659	up	10.5422	11.5081	10.2211	14.1229	13.5335	13.7807
ENST00000488069	ENSG00000160799	CCDC12	897	retained_intron	lncRNA	0.0438929	0.578119	1.29403	up	0	0	0.091898	0.28131	0.523315	0.22903
ENST00000488395	ENSG00000101160	CTSZ	647	retained_intron	lncRNA	0.0203732	0.391193	1.20852	up	0.268521	0.208322	0.114186	0.403517	0.385755	0.52555
ENST00000488400	ENSG00000143977	SNRPG	393	retained_intron	lncRNA	0.0157761	0.367318	1.45014	up	0.553658	1.01704	0.550801	1.41712	1.45971	1.42134
ENST00000488839	ENSG00000144040	SFXN5	671	retained_intron	lncRNA	0.0404381	0.557635	1.20551	up	0.472655	0.376113	0.182032	0.701836	0.55425	0.543923
ENST00000488971	ENSG00000115548	KDM3A	975	retained_intron	lncRNA	0.00409739	0.367318	1.21262	up	0.482546	0.437057	0.307888	0.652781	0.734879	0.703571
ENST00000489011	ENSG00000244468	RP11-206M11.7	551	antisense	lncRNA	0.0322476	0.498634	1.42924	up	2.1782	1.26731	2.62489	3.40827	3.53138	3.04785
ENST00000489263	ENSG00000106348	IMPDH1	598	protein_coding	mRNA	0.0132433	0.367318	1.26026	up	0.299017	0.303108	0.554236	0.658597	0.862335	0.753182
ENST00000489387	ENSG00000221838	AP4M1	562	retained_intron	lncRNA	0.0209628	0.398692	1.23997	up	0.012969	0.107965	0	0.300165	0.354715	0.200634
ENST00000489497	ENSG00000160211	G6PD	512	retained_intron	lncRNA	0.0256969	0.440866	1.76966	up	4.5357	3.41611	2.21984	5.34615	6.86419	7.19931
ENST00000489597	ENSG00000135899	SP110	416	retained_intron	lncRNA	0.0431571	0.573863	1.41051	up	0.089234	0.096746	0.428415	0.497099	0.98992	0.675595
ENST00000490164	ENSG00000180628	PCGF5	973	processed_transcript	lncRNA	1.32728e-05	0.0454384	1.65169	up	1.51802	1.06604	3.76947	4.09593	4.03874	3.93211
ENST00000490266	ENSG00000163218	PGLYRP4	531	processed_transcript	lncRNA	0.00409477	0.367318	1.38686	up	0	0	0.061963	0.493871	0.445645	0.325191
ENST00000490278	ENSG00000117335	CD46	747	retained_intron	lncRNA	0.0154545	0.367318	1.26282	up	0.549776	0.468481	0.14901	0.634769	0.778142	0.735934
ENST00000490544	ENSG00000157653	C9orf43	547	processed_transcript	lncRNA	0.0127294	0.367318	1.3224	up	0	0	0	0.222271	0.428715	0.323239
ENST00000490618	ENSG00000128609	NDUFA5	2802	retained_intron	lncRNA	0.0101345	0.367318	1.43819	up	0	0.002173	0.547277	0.686863	0.846432	0.588223
ENST00000490756	ENSG00000103335	PIEZO1	446	retained_intron	lncRNA	0.0266185	0.44871	1.35763	up	3.96064	4.84915	2.98098	4.93597	5.29059	6.33006
ENST00000490880	ENSG00000135899	SP110	873	retained_intron	lncRNA	0.0463621	0.591662	1.42005	up	0.174881	0.342774	0.255684	1.08093	0.743585	0.559856
ENST00000491281	ENSG00000144802	NFKBIZ	564	protein_coding	mRNA	0.0126637	0.367318	1.40359	up	0.200104	0.392048	0.241502	0.664737	0.787974	0.904561
ENST00000491310	ENSG00000149485	FADS1	525	protein_coding	mRNA	0.0247074	0.431837	1.31217	up	0.067672	0.092411	0.039443	0.403289	0.264197	0.533372
ENST00000491322	ENSG00000135821	GLUL	6132	processed_transcript	lncRNA	0.0276102	0.45789	1.20584	up	0.19479	0.265479	0.399543	0.600691	0.462394	0.615974
ENST00000491330	ENSG00000120913	PDLIM2	563	retained_intron	lncRNA	0.00458762	0.367318	1.22689	up	0.324614	0.453544	0.288353	0.678994	0.640625	0.63913
ENST00000491378	ENSG00000117616	RSRP1	487	retained_intron	lncRNA	0.00927485	0.367318	1.27605	up	0.000504	0	0.123021	0.258396	0.340606	0.408967
ENST00000491453	ENSG00000085449	WDFY1	308	retained_intron	lncRNA	0.00349183	0.367318	1.20929	up	0.071073	0.069137	0.127041	0.3612	0.272573	0.329077
ENST00000491632	ENSG00000054267	ARID4B	3823	retained_intron	lncRNA	0.00142093	0.302267	1.29117	up	0.735964	1.00433	0.31497	1.11659	1.10788	1.07814
ENST00000491668	ENSG00000058262	SEC61A1	558	retained_intron	lncRNA	0.0463018	0.591143	1.34308	up	0.782106	1.237	0.863416	1.37308	1.62761	1.83246
ENST00000491920	ENSG00000197150	ABCB8	717	protein_coding	mRNA	0.0284798	0.467054	1.23336	up	0.18165	0.085277	0.160372	0.372084	0.342207	0.525236
ENST00000491924	ENSG00000163795	ZNF513	566	processed_transcript	lncRNA	0.0185532	0.372806	1.22987	up	0	0	0	0.327795	0.178236	0.190014
ENST00000491987	ENSG00000100284	TOM1	852	retained_intron	lncRNA	0.0109614	0.367318	1.23995	up	0.074829	0.084795	0.088228	0.410894	0.360362	0.262217
ENST00000492540	ENSG00000054148	PHPT1	1316	processed_transcript	lncRNA	0.0444479	0.580709	1.54114	up	5.86152	5.31828	6.01817	7.41987	10.0202	11.1287
ENST00000492545	ENSG00000144579	CTDSP1	634	processed_transcript	lncRNA	0.0439993	0.578608	1.71448	up	0.127171	0	0.132883	0.868466	0.477531	1.36328
ENST00000492601	ENSG00000198964	SGMS1	625	processed_transcript	lncRNA	0.0232803	0.419025	2.41629	up	0.968922	0.704266	0.268984	1.79457	3.07145	3.98124
ENST00000492633	ENSG00000134716	CYP2J2	2549	processed_transcript	lncRNA	0.00404667	0.367318	1.21745	up	0.255537	0.344663	0.103995	0.47488	0.438764	0.540705
ENST00000492899	ENSG00000204427	ABHD16A	583	retained_intron	lncRNA	0.0061545	0.367318	1.51196	up	0.243393	0.11771	0.100271	0.803056	0.804739	0.612045
ENST00000493023	ENSG00000133466	C1QTNF6	3296	retained_intron	lncRNA	0.0103561	0.367318	1.73199	up	0.758245	0.63642	1.35337	2.61681	2.64902	1.81841
ENST00000493262	ENSG00000059378	PARP12	646	retained_intron	lncRNA	0.00591943	0.367318	1.50245	up	0.14485	0.155121	0.06157	0.841995	0.564913	0.631777
ENST00000493426	ENSG00000182944	EWSR1	581	retained_intron	lncRNA	0.0381248	0.542338	1.2315	up	1.66105	1.60032	1.39903	1.98765	2.45087	1.96385
ENST00000493556	ENSG00000100416	TRMU	432	processed_transcript	lncRNA	0.044597	0.581816	1.22346	up	0.056419	0.223784	0.022281	0.227992	0.402147	0.374725
ENST00000493859	ENSG00000196498	NCOR2	557	retained_intron	lncRNA	0.0135805	0.367318	1.37736	up	0.246085	0.172003	0.22834	0.556275	0.843327	0.64007
ENST00000494109	ENSG00000100105	PATZ1	835	retained_intron	lncRNA	0.0198574	0.386002	1.27657	up	0.719524	0.604406	0.785809	1.38523	1.11921	1.05753
ENST00000494172	ENSG00000168754	FAM178B	592	retained_intron	lncRNA	0.0241248	0.425656	1.63614	up	0.257255	0.616369	0.049505	0.944488	0.841992	1.46244
ENST00000494313	ENSG00000165272	AQP3	1505	processed_transcript	lncRNA	0.0117562	0.367318	1.37045	up	0	0.065301	0	0.531997	0.33932	0.32837
ENST00000494568	ENSG00000188313	PLSCR1	817	retained_intron	lncRNA	0.024958	0.433779	1.77099	up	0	0.328115	0.102462	1.38779	0.838056	0.827909
ENST00000494854	ENSG00000164054	SHISA5	1908	retained_intron	lncRNA	0.00182293	0.331447	2.71689	up	1.50823	0.948547	1.95904	6.04881	6.33813	4.92368
ENST00000494866	ENSG00000160710	ADAR	471	processed_transcript	lncRNA	0.0394311	0.550523	2.56524	up	1.76764	1.32065	0.790407	5.70294	2.69274	6.46468
ENST00000494880	ENSG00000116679	IVNS1ABP	2527	processed_transcript	lncRNA	0.0158194	0.367318	1.26573	up	0.60037	0.658866	0.341297	0.969293	0.7665	1.01006
ENST00000495187	ENSG00000106682	EIF4H	575	processed_transcript	lncRNA	0.0449194	0.583551	1.23962	up	0.315805	0.465989	0.416075	0.606118	0.881477	0.72047
ENST00000495205	ENSG00000116857	TMEM9	971	processed_transcript	lncRNA	0.0126094	0.367318	1.50862	up	0.20632	0	0.064979	0.607466	0.559495	0.760172
ENST00000495279	ENSG00000125505	MBOAT7	1585	protein_coding	mRNA	0.0232987	0.419293	1.23164	up	0.216384	0.183226	0.11318	0.46654	0.517777	0.330153
ENST00000495535	ENSG00000214022	REPIN1	672	retained_intron	lncRNA	0.0284814	0.467054	1.50962	up	1.1862	1.39981	0.442344	1.52598	1.75061	2.46358
ENST00000495588	ENSG00000165219	GAPVD1	274	processed_transcript	lncRNA	0.016874	0.367318	1.86211	up	0.882724	0.817531	0.094741	2.10962	1.31474	2.09451
ENST00000495590	ENSG00000146955	RAB19	645	protein_coding	mRNA	0.0164665	0.367318	1.39412	up	0.444997	0.512659	0.297586	1.0312	0.74805	1.11718
ENST00000495834	ENSG00000111669	TPI1	820	protein_coding	mRNA	0.00365193	0.367318	1.2894	up	1.41892	1.55212	1.10795	1.92529	1.92089	2.17357
ENST00000495956	ENSG00000151474	FRMD4A	1287	protein_coding	mRNA	0.00265555	0.367318	1.21916	up	0.932891	0.820476	0.971838	1.28107	1.34393	1.37419
ENST00000496267	ENSG00000162819	BROX	782	processed_transcript	lncRNA	0.00671701	0.367318	1.5604	up	0.218679	0.199728	0.74324	0.997405	1.36666	1.17181
ENST00000496329	ENSG00000158286	RNF207	231	retained_intron	lncRNA	0.0127874	0.367318	1.29511	up	0.209331	0.292782	0.298462	0.747525	0.644435	0.541908
ENST00000496425	ENSG00000125520	SLC2A4RG	502	processed_transcript	lncRNA	0.000930706	0.242135	2.01193	up	2.71764	2.2862	2.90064	6.86552	6.31989	5.89077
ENST00000496484	ENSG00000131368	MRPS25	823	processed_transcript	lncRNA	0.0263999	0.447797	2.40088	up	1.21236	0	1.83456	3.43453	3.97264	3.46764
ENST00000496785	ENSG00000144579	CTDSP1	460	processed_transcript	lncRNA	0.0177688	0.367318	1.65836	up	0.22454	0.15055	0	1.1488	0.82378	0.600646
ENST00000496847	ENSG00000167920	TMEM99	259	processed_transcript	lncRNA	0.0359077	0.526865	1.21315	up	0	0.090637	0.226469	0.431421	0.322219	0.292417
ENST00000496872	ENSG00000133056	PIK3C2B	651	processed_transcript	lncRNA	0.021598	0.405748	1.2142	up	0.455669	0.583245	0.618986	0.889803	0.972677	0.805874
ENST00000496955	ENSG00000204569	PPP1R10	476	retained_intron	lncRNA	0.0336328	0.50914	1.32438	up	0.01563	0.217612	0.355468	0.605265	0.586101	0.570511
ENST00000496988	ENSG00000164880	INTS1	421	processed_transcript	lncRNA	0.022545	0.411941	1.25905	up	0.326473	0.140234	0.376854	0.555522	0.710643	0.597084
ENST00000497006	ENSG00000147955	SIGMAR1	610	processed_transcript	lncRNA	0.0409978	0.561367	1.48153	up	0.418939	0.608918	0.16763	1.37671	0.71808	1.0323
ENST00000497054	ENSG00000114978	MOB1A	784	processed_transcript	lncRNA	0.0239012	0.423896	1.42674	up	1.27171	1.31442	0.626105	2.06857	1.50201	2.06044
ENST00000497675	ENSG00000162585	FAAP20	4478	retained_intron	lncRNA	0.0145025	0.367318	1.33894	up	0.973067	1.18914	0.328757	1.45773	1.13331	1.43882
ENST00000497716	ENSG00000099949	LZTR1	1031	processed_transcript	lncRNA	0.00953249	0.367318	1.31953	up	0.214837	0.106812	0.127227	0.516392	0.591207	0.440681
ENST00000497882	ENSG00000115657	ABCB6	3008	retained_intron	lncRNA	0.0041137	0.367318	1.97106	up	2.46116	4.15894	0.456337	3.73809	5.1308	4.69982
ENST00000497980	ENSG00000106089	STX1A	503	retained_intron	lncRNA	0.019546	0.382779	1.24806	up	0	0	0	0.14983	0.279842	0.319887
ENST00000497992	ENSG00000172264	MACROD2	777	processed_transcript	lncRNA	0.0337634	0.51009	1.28691	up	0.587449	0.900511	0.200436	0.721697	1.0249	1.07281
ENST00000498064	ENSG00000123562	MORF4L2	451	processed_transcript	lncRNA	0.0396547	0.552363	1.37373	up	12.2345	12.6555	13.7906	15.894	17.9274	20.9557
ENST00000498543	ENSG00000117411	B4GALT2	360	processed_transcript	lncRNA	0.0291282	0.471704	1.30644	up	8.8e-05	0	0.188022	0.574472	0.315805	0.316363
ENST00000498638	ENSG00000146826	C7orf43	626	retained_intron	lncRNA	0.0418881	0.567146	1.43073	up	0.659105	0.728117	0.180615	0.80648	1.06812	1.49677
ENST00000503216	ENSG00000169230	PRELID1	1171	protein_coding	mRNA	0.0189316	0.377005	1.20196	up	0.568065	0.538287	0.734836	1.06506	0.827736	0.962036
ENST00000503582	ENSG00000187678	SPRY4	575	processed_transcript	lncRNA	0.0180438	0.368116	1.32837	up	0	0	0	0.473988	0.271134	0.252407
ENST00000504145	ENSG00000251136	RP11-37B2.1	1572	lincRNA	lncRNA	0.00666439	0.367318	1.69628	up	1.70817	1.34651	1.54633	2.85845	3.48251	3.58793
ENST00000504152	ENSG00000204580	DDR1	695	retained_intron	lncRNA	0.00428197	0.367318	1.39185	up	0.753386	0.7205	0.904233	1.41698	1.41859	1.68951
ENST00000504188	ENSG00000128050	PAICS	491	retained_intron	lncRNA	0.0297559	0.47786	1.92203	up	0.51861	0.425486	1.61096	1.72367	2.76747	3.28497
ENST00000505236	ENSG00000104856	RELB	2219	protein_coding	mRNA	0.0360143	0.527741	1.62713	up	0.220388	0.116596	0.145536	1.36261	0.648723	0.729626
ENST00000505337	ENSG00000228716	DHFR	1719	protein_coding	mRNA	0.0189775	0.377596	3.71755	up	0	0.320402	0	5.4266	2.31836	2.10038
ENST00000505383	ENSG00000185305	ARL15	536	retained_intron	lncRNA	0.0204313	0.391881	1.2611	up	0.000205	0.100207	0.104526	0.276251	0.346393	0.42561
ENST00000505756	ENSG00000120733	KDM3B	654	retained_intron	lncRNA	0.0468391	0.593468	1.33411	up	0.294021	0.036816	0.121575	0.569541	0.612481	0.414229
ENST00000506641	ENSG00000049656	CLPTM1L	792	processed_transcript	lncRNA	0.0228269	0.414569	1.40963	up	0.427692	0.244091	0.11999	0.704166	0.926894	0.65637
ENST00000506672	ENSG00000170089	RP11-423H2.1	1570	processed_transcript	lncRNA	0.00874606	0.367318	2.12912	up	7.05297	2.59084	30.5151	22.7092	21.2318	21.7184
ENST00000507094	ENSG00000109685	WHSC1	563	retained_intron	lncRNA	0.0438018	0.577692	1.21376	up	0.264978	0.275262	0.272525	0.581464	0.401725	0.656239
ENST00000507186	ENSG00000164292	RHOBTB3	492	retained_intron	lncRNA	0.0304072	0.483466	1.64275	up	1.08881	0.669959	0.719657	1.63892	2.52341	1.83778
ENST00000507576	ENSG00000137177	KIF13A	529	processed_transcript	lncRNA	0.0197211	0.384412	1.23951	up	0.086079	0	0	0.205765	0.344032	0.270237
ENST00000508179	ENSG00000250786	SNHG18	1799	lincRNA	lncRNA	0.044122	0.579364	1.38482	up	1.11257	0.731317	0.336039	1.19071	1.36395	1.3781
ENST00000508411	ENSG00000138162	TACC2	497	protein_coding	mRNA	0.00795845	0.367318	1.23541	up	0.216295	0.169961	0.318441	0.616655	0.528106	0.457725
ENST00000508686	ENSG00000164338	UTP15	538	protein_coding	mRNA	0.0420774	0.567911	1.2274	up	0.561747	0.531881	0.490149	1.05662	0.727247	0.847448
ENST00000508821	ENSG00000164181	ELOVL7	3994	protein_coding	mRNA	0.0265799	0.448532	2.76364	up	5.64121	2.41224	3.1557	13.8953	10.4292	10.6715
ENST00000508906	ENSG00000186470	BTN3A2	3733	protein_coding	mRNA	0.0420823	0.567911	1.22444	up	0.022789	0.067276	0.070321	0.179124	0.396692	0.304598
ENST00000509163	ENSG00000113391	FAM172A	1369	protein_coding	mRNA	0.0245914	0.430467	1.50617	up	0.88034	0.813882	0.51503	1.66017	1.90617	1.21562
ENST00000509310	ENSG00000146094	DOK3	603	protein_coding	mRNA	0.0403456	0.557129	1.47518	up	0.323646	0	0.443617	1.02597	0.601256	0.979028
ENST00000509564	ENSG00000073578	SDHA	630	protein_coding	mRNA	0.0162214	0.367318	1.50242	up	0.467628	0.329145	0.418406	0.852128	1.28067	1.23043
ENST00000509715	ENSG00000250241	RP11-9G1.3	564	lincRNA	lncRNA	0.0308778	0.487711	1.22665	up	1.4753	1.36763	1.35988	2.20852	1.81745	1.8185
ENST00000509887	ENSG00000164211	STARD4	1186	protein_coding	mRNA	0.0229871	0.416248	1.20653	up	0.030374	0.118528	0	0.185591	0.2619	0.333536
ENST00000510157	ENSG00000198589	LRBA	1636	retained_intron	lncRNA	0.00413963	0.367318	1.45216	up	0.003498	0.00729	0.004021	0.50393	0.346988	0.534027
ENST00000510177	ENSG00000168621	GDNF	295	protein_coding	mRNA	0.0141834	0.367318	1.49876	up	0.151607	0.117136	0	0.423015	0.670302	0.784819
ENST00000511095	ENSG00000059145	UNKL	924	retained_intron	lncRNA	0.0173336	0.367318	1.61781	up	1.80743	1.63817	1.02468	3.47671	2.45555	2.92627
ENST00000511452	ENSG00000170448	NFXL1	419	retained_intron	lncRNA	0.0484412	0.603538	1.22358	up	0.561305	0.978417	0.344059	0.902888	1.03057	0.871853
ENST00000511747	ENSG00000087266	SH3BP2	2351	protein_coding	mRNA	0.0488683	0.606149	1.51409	up	1.64061	2.57984	2.52287	4.16637	3.35621	4.20518
ENST00000512423	ENSG00000112659	CUL9	566	retained_intron	lncRNA	0.0181535	0.368463	1.30342	up	0.29049	0.094886	0.164326	0.553936	0.551588	0.513383
ENST00000512431	ENSG00000183258	DDX41	904	retained_intron	lncRNA	0.0121667	0.367318	1.29261	up	0	0.056758	0.171295	0.405296	0.473414	0.316466
ENST00000512877	ENSG00000114686	MRPL3	659	protein_coding	mRNA	0.00188581	0.333763	1.20877	up	0.213777	0.210587	0.261659	0.443958	0.509059	0.511938
ENST00000513162	ENSG00000145916	RMND5B	4250	retained_intron	lncRNA	0.0209224	0.398366	1.28619	up	3.77721	4.8179	2.18806	4.07789	4.61865	5.05309
ENST00000513538	ENSG00000070814	TCOF1	701	protein_coding	mRNA	0.0265507	0.448532	1.38082	up	0.114252	0.063415	1.05204	0.905114	0.743384	1.13677
ENST00000514051	ENSG00000164024	METAP1	1058	protein_coding	mRNA	0.0212133	0.401228	1.32816	up	0.152201	0.027215	0.189878	0.577785	0.357567	0.56878
ENST00000514139	ENSG00000138698	RAP1GDS1	1103	protein_coding	mRNA	0.0125867	0.367318	1.22265	up	0.247476	0.405719	0.209147	0.524013	0.616624	0.544334
ENST00000514198	ENSG00000164292	RHOBTB3	496	protein_coding	mRNA	0.0298565	0.478839	1.21951	up	0.363084	0.368383	0.49682	0.627758	0.683932	0.873276
ENST00000514238	ENSG00000176783	RUFY1	575	processed_transcript	lncRNA	0.0126274	0.367318	1.29204	up	0.258255	0.243916	0.126386	0.631907	0.437662	0.594908
ENST00000514790	ENSG00000146263	MMS22L	334	retained_intron	lncRNA	0.00629897	0.367318	1.24842	up	0.053396	0.046273	0.045889	0.238962	0.33264	0.357077
ENST00000514831	ENSG00000170365	SMAD1	569	protein_coding	mRNA	0.0192645	0.380338	1.49029	up	0	0	0.025631	0.505124	0.713147	0.322092
ENST00000514888	ENSG00000128050	PAICS	3340	protein_coding	mRNA	0.0335457	0.508736	1.86969	up	19.4668	13.4663	8.98587	25.7967	27.0059	22.8432
ENST00000517535	ENSG00000120896	SORBS3	3067	retained_intron	lncRNA	0.0439078	0.578141	1.22471	up	0.131993	0.04299	0.138832	0.26606	0.325238	0.485692
ENST00000517709	ENSG00000104738	MCM4	842	retained_intron	lncRNA	0.024017	0.424567	1.4487	up	0.565194	0.690357	0.628129	1.32107	1.09476	1.68721
ENST00000517836	ENSG00000078674	PCM1	580	retained_intron	lncRNA	0.0398537	0.553751	1.28419	up	0.482938	0.302455	0.485867	0.670597	0.845165	0.998654
ENST00000518219	ENSG00000161010	C5orf45	4145	protein_coding	mRNA	0.0124465	0.367318	1.47917	up	0.940658	1.27002	0.829764	1.92706	2.22247	1.69301
ENST00000518333	ENSG00000176853	FAM91A1	570	retained_intron	lncRNA	0.00882963	0.367318	1.23952	up	0.163806	0.132737	0.15807	0.422629	0.359943	0.505914
ENST00000518437	ENSG00000206573	THUMPD3-AS1	240	antisense	lncRNA	0.0347461	0.517563	1.24308	up	0.714296	1.06513	0.191156	1.02381	1.05958	0.796462
ENST00000518996	ENSG00000189376	C8orf76	836	retained_intron	lncRNA	0.0400906	0.555208	1.32123	up	0.596508	0.461048	0.745788	1.34383	0.863254	1.20514
ENST00000519374	ENSG00000113732	ATP6V0E1	1433	protein_coding	mRNA	0.0110567	0.367318	1.60895	up	58.1626	56.2897	22.5996	61.7698	66.1692	67.3682
ENST00000519404	ENSG00000155508	CNOT8	945	protein_coding	mRNA	0.0354218	0.522927	1.4531	up	0.322408	0.157238	0.112847	0.523606	0.701382	0.986812
ENST00000519450	ENSG00000104412	EMC2	2736	retained_intron	lncRNA	0.0204602	0.392249	1.24691	up	0.446308	0.602675	0.161437	0.838035	0.627989	0.666116
ENST00000519459	ENSG00000113734	BNIP1	1130	protein_coding	mRNA	0.0338158	0.510339	1.27499	up	0.518345	0.561191	0.219892	0.639652	0.756154	1.00126
ENST00000519470	ENSG00000104738	MCM4	498	retained_intron	lncRNA	0.042832	0.571442	1.27132	up	0.656021	0.891078	0.572807	1.38034	1.05791	1.02156
ENST00000519682	ENSG00000164934	DCAF13	837	protein_coding	mRNA	0.0451038	0.584442	1.65276	up	0.247113	0.045747	0	1.04031	0.425205	0.994663
ENST00000519718	ENSG00000272772	CTD-2410N18.5	483	protein_coding	mRNA	0.049028	0.607124	1.26081	up	0	0.182682	0.235719	0.458605	0.495369	0.364272
ENST00000519801	ENSG00000247081	BAALC-AS1	977	antisense	lncRNA	0.0404997	0.558356	1.54882	up	0	0	0	0.320849	0.471948	0.907561
ENST00000520271	ENSG00000164919	COX6C	571	protein_coding	mRNA	0.0132021	0.367318	1.40589	up	139.648	128.796	143.868	182.09	215.452	186.86
ENST00000520867	ENSG00000113742	CPEB4	2607	protein_coding	mRNA	0.0120726	0.367318	1.50965	up	1.11404	0.830556	1.18966	2.48078	1.94696	1.90744
ENST00000520912	ENSG00000197226	TBC1D9B	1931	retained_intron	lncRNA	0.0479417	0.600499	1.32347	up	0.392157	0.686812	0.985849	1.33007	1.15918	1.22843
ENST00000521162	ENSG00000155975	VPS37A	818	processed_transcript	lncRNA	0.0414549	0.564213	1.2692	up	0.055555	0	0.558428	0.742916	0.455671	0.421655
ENST00000521458	ENSG00000104756	KCTD9	541	retained_intron	lncRNA	0.0388149	0.546684	1.20778	up	0.000244	0.08832	0.010555	0.192446	0.193874	0.350389
ENST00000521468	ENSG00000147689	FAM83A	614	processed_transcript	lncRNA	0.0287437	0.469283	2.91858	up	0.133527	1.86045	0.036699	3.61767	2.75177	3.29869
ENST00000521602	ENSG00000145736	GTF2H2	457	protein_coding	mRNA	0.00291074	0.367318	1.82375	up	0	0.209783	0	0.813051	0.936023	1.04595
ENST00000521788	ENSG00000184374	COLEC10	670	processed_transcript	lncRNA	0.049309	0.609031	1.38163	up	1.85717	2.23119	0.176653	2.13098	1.50075	2.13205
ENST00000521861	ENSG00000147677	EIF3H	3959	protein_coding	mRNA	0.0247806	0.432229	1.91437	up	34.672	33.4211	5.0283	32.7165	32.3821	33.7996
ENST00000521933	ENSG00000147649	MTDH	565	protein_coding	mRNA	0.0439131	0.578141	1.28732	up	2.34144	2.86764	1.90879	3.67028	3.30325	2.84407
ENST00000521970	ENSG00000081059	TCF7	602	retained_intron	lncRNA	0.01173	0.367318	1.35935	up	0	0	0.056947	0.488599	0.423376	0.265196
ENST00000522233	ENSG00000181638	ZFP41	548	processed_transcript	lncRNA	0.0143334	0.367318	1.20419	up	2.1297	1.94412	1.51457	2.38918	2.35986	2.45308
ENST00000522301	ENSG00000108515	ENO3	1081	protein_coding	mRNA	0.0344513	0.515071	1.27587	up	0.566845	0.840965	0.62021	1.06349	1.29239	1.02631
ENST00000522652	ENSG00000008513	ST3GAL1	2580	protein_coding	mRNA	0.0342079	0.513183	1.34403	up	4.96652	4.75037	4.69504	6.83123	5.90916	7.73716
ENST00000522858	ENSG00000055147	FAM114A2	3379	protein_coding	mRNA	0.00227388	0.360274	1.47948	up	0.584246	0.512342	0.669952	1.2271	1.49424	1.36305
ENST00000522870	ENSG00000102878	HSF4	1599	retained_intron	lncRNA	0.0331994	0.506349	1.43048	up	0.296558	0.460903	0.672459	0.95404	1.4177	1.01664
ENST00000522899	ENSG00000158106	RHPN1	1778	retained_intron	lncRNA	0.0194493	0.381848	1.26101	up	8.14661	8.48249	5.6286	9.66923	8.51227	9.74647
ENST00000523078	ENSG00000064313	TAF2	764	retained_intron	lncRNA	0.0179508	0.367544	1.30828	up	0.154931	0.058947	0.05206	0.342605	0.536831	0.388031
ENST00000523452	ENSG00000245146	LINC01024	555	antisense	lncRNA	0.0247921	0.432274	1.4789	up	0	0	0.706227	1.01942	0.904454	0.565603
ENST00000523745	ENSG00000253776	RP11-6N13.4	567	lincRNA	lncRNA	0.0281334	0.463169	1.79078	up	1.00452	0.818455	0.664627	2.62972	1.55554	2.68891
ENST00000523812	ENSG00000250571	GLI4	2333	processed_transcript	lncRNA	0.000574704	0.191004	1.48741	up	0.988978	1.11518	0.516516	1.57687	1.75993	1.8055
ENST00000524260	ENSG00000205133	TRIQK	1873	retained_intron	lncRNA	0.0185387	0.372806	1.23255	up	0	0	0.26358	0.399825	0.400519	0.25366
ENST00000524443	ENSG00000182272	B4GALNT4	420	retained_intron	lncRNA	0.0363616	0.52964	1.44266	up	1.9501	2.63296	1.89163	2.95857	4.10607	3.47951
ENST00000524506	ENSG00000173653	RCE1	1379	protein_coding	mRNA	0.0362175	0.529057	1.28668	up	2.56983	3.01204	3.47713	4.5504	3.80791	4.244
ENST00000524646	ENSG00000184363	PKP3	312	retained_intron	lncRNA	0.00417008	0.367318	1.41177	up	0.322167	0.251448	0.096238	0.649335	0.673492	0.80439
ENST00000524719	ENSG00000104522	TSTA3	762	protein_coding	mRNA	0.0279401	0.461	1.58107	up	0.801432	0.756028	0.4487	1.70019	1.99823	1.16757
ENST00000524729	ENSG00000172803	SNX32	911	retained_intron	lncRNA	0.0111305	0.367318	1.44727	up	0	0	0.314689	0.464332	0.636637	0.736002
ENST00000524883	ENSG00000104529	EEF1D	828	protein_coding	mRNA	0.0127235	0.367318	1.36596	up	0.957297	0.732358	0.819494	1.68184	1.47752	1.3722
ENST00000524896	ENSG00000149100	EIF3M	1207	protein_coding	mRNA	0.0105313	0.367318	2.61433	up	3.39523	1.42949	7.42063	13.3125	8.97918	12.3476
ENST00000525167	ENSG00000182704	TSKU	542	protein_coding	mRNA	0.0413324	0.563482	1.31405	up	1.20388	1.55807	1.52126	1.88565	2.30925	2.39161
ENST00000525245	ENSG00000172890	NADSYN1	603	processed_transcript	lncRNA	0.0250063	0.433784	1.33533	up	1.04631	0.882181	0.726851	1.25721	1.68147	1.56684
ENST00000525513	ENSG00000178719	GRINA	796	retained_intron	lncRNA	0.0432239	0.574184	1.42508	up	1.18986	1.7767	1.17312	2.14429	2.8384	2.08163
ENST00000525554	ENSG00000185885	IFITM1	80	processed_transcript	ncRNA	0.0420496	0.567911	1.48655	up	0.131802	0	0.029617	0.884392	0.422385	0.428685
ENST00000525682	ENSG00000117682	DHDDS	1235	protein_coding	mRNA	0.00949253	0.367318	1.26812	up	0.39048	0.207027	0.945306	0.888193	0.852622	1.03992
ENST00000525696	ENSG00000213920	MDP1	527	processed_transcript	lncRNA	0.0289975	0.470988	1.46485	up	0.92145	0.483426	0.700459	1.7038	1.40491	1.36576
ENST00000525804	ENSG00000185101	ANO9	260	retained_intron	lncRNA	0.0393648	0.550122	1.27491	up	0.295858	0.533704	0.192081	0.750584	0.772321	0.533405
ENST00000526183	ENSG00000160972	PPP1R16A	4311	retained_intron	lncRNA	0.0120646	0.367318	1.48325	up	3.48746	3.10388	4.9908	5.53792	6.99705	6.27706
ENST00000526723	ENSG00000159176	CSRP1	574	protein_coding	mRNA	0.0220743	0.408223	1.32069	up	0.511596	0.248727	0.425967	0.905977	0.778911	0.850694
ENST00000526729	ENSG00000150676	CCDC83	1029	protein_coding	mRNA	0.0303331	0.482711	1.39966	up	2.57176	3.30268	3.30614	4.20303	5.05057	4.81446
ENST00000526811	ENSG00000142089	IFITM3	543	protein_coding	mRNA	0.00126793	0.280301	4.5278	up	0.169668	0.00052	0.672486	4.84152	3.80282	5.97691
ENST00000527043	ENSG00000173227	SYT12	1661	protein_coding	mRNA	0.0441426	0.579444	1.44814	up	9.54147	10.512	10.6957	18.1118	12.92	15.3416
ENST00000527160	ENSG00000185507	IRF7	617	retained_intron	lncRNA	0.0290173	0.471124	1.72385	up	0.952933	0.75049	0.437349	1.34685	1.99407	2.44355
ENST00000527227	ENSG00000172890	NADSYN1	799	retained_intron	lncRNA	0.000695929	0.212179	1.25757	up	0.093849	0.105709	0	0.320535	0.309806	0.369026
ENST00000527323	ENSG00000014216	CAPN1	3086	protein_coding	mRNA	0.000337953	0.150235	1.50545	up	2.81914	2.84767	2.54358	4.52411	4.46193	4.81213
ENST00000527328	ENSG00000185122	HSF1	2336	retained_intron	lncRNA	0.0309331	0.48807	1.41767	up	0.340808	0.085964	0.52794	0.950147	1.05914	0.650684
ENST00000527523	ENSG00000137501	SYTL2	3049	protein_coding	mRNA	0.00210584	0.347551	1.43163	up	2.93201	2.9063	4.51608	5.32169	5.244	5.65403
ENST00000527778	ENSG00000255100	RP11-21L23.3	293	antisense	lncRNA	0.0491995	0.608209	1.55213	up	0.258851	0.067124	0.055434	1.1138	0.687704	0.474154
ENST00000527972	ENSG00000214872	SMTNL1	1649	protein_coding	mRNA	0.0499814	0.61285	1.45486	up	0.067207	0.088185	0.027409	0.349021	0.43384	0.881069
ENST00000528275	ENSG00000156587	UBE2L6	605	retained_intron	lncRNA	0.0117573	0.367318	3.17872	up	0.091819	0	0.097661	1.70387	1.97411	3.82472
ENST00000528798	ENSG00000211450	C11orf31	469	protein_coding	mRNA	0.0247094	0.431837	1.91732	up	5.95842	7.2751	8.94986	19.4707	13.5173	13.156
ENST00000528867	ENSG00000177697	CD151	545	protein_coding	mRNA	0.0184832	0.371961	1.46572	up	0.125457	0	0.024929	0.572088	0.3693	0.684078
ENST00000529006	ENSG00000173120	KDM2A	6967	protein_coding	mRNA	0.000968942	0.244825	1.72278	up	16.4049	15.7438	13.7104	25.775	26.1229	28.4913
ENST00000529124	ENSG00000173120	KDM2A	664	processed_transcript	lncRNA	0.00540839	0.367318	1.22463	up	0.531832	0.737679	0.203355	0.826658	0.75318	0.74328
ENST00000529162	ENSG00000110367	DDX6	1795	retained_intron	lncRNA	0.0461673	0.59094	1.4312	up	0.768651	0.720477	0.346304	1.25403	1.64429	0.934597
ENST00000529207	ENSG00000162298	SYVN1	811	retained_intron	lncRNA	0.00823007	0.367318	1.37079	up	0.278705	0.215338	0.335883	0.6702	0.90804	0.698535
ENST00000529308	ENSG00000118369	USP35	4216	protein_coding	mRNA	0.0211577	0.400619	1.54677	up	2.44057	1.70972	1.42452	3.29946	3.23446	3.45824
ENST00000529369	ENSG00000254682	RP11-660L16.2	680	antisense	lncRNA	0.0110423	0.367318	3.34197	up	2.01768	1.12391	1.83945	5.59562	10.3446	8.31601
ENST00000529579	ENSG00000104388	RAB2A	680	protein_coding	mRNA	0.00758532	0.367318	2.09711	up	0.862123	1.70041	0.501335	3.32131	3.17399	2.58258
ENST00000529986	ENSG00000198561	CTNND1	5727	protein_coding	mRNA	0.000383009	0.158249	2.14447	up	3.27567	1.77181	11.3537	11.2663	11.1565	11.0458
ENST00000529994	ENSG00000087365	SF3B2	1004	retained_intron	lncRNA	0.0162171	0.367318	2.84368	up	0.629642	0.897296	0.732238	4.28553	5.52997	2.54733
ENST00000530019	ENSG00000167996	FTH1	550	protein_coding	mRNA	0.0118606	0.367318	2.19311	up	0.451425	0	2.04929	2.34964	3.71626	2.46505
ENST00000530341	ENSG00000181135	ZNF707	489	processed_transcript	lncRNA	0.0324447	0.500544	1.41781	up	0.150429	0.318686	0.03427	0.884535	0.531123	0.503093
ENST00000530445	ENSG00000104529	EEF1D	1217	protein_coding	mRNA	0.0280281	0.462073	1.83841	up	10.0442	9.96683	8.60006	22.9733	18.2981	14.3172
ENST00000530691	ENSG00000133816	MICAL2	6307	retained_intron	lncRNA	0.00364596	0.367318	1.88494	up	0.270414	0.193149	0.267625	1.16823	1.66248	1.24207
ENST00000530796	ENSG00000197858	GPAA1	936	retained_intron	lncRNA	0.0266183	0.44871	1.73969	up	0.200929	0.271241	0.068848	1.2904	1.27266	0.612117
ENST00000530981	ENSG00000087365	SF3B2	1080	protein_coding	mRNA	0.00592776	0.367318	4.99417	up	1.17017	0.503786	1.07692	8.23029	12.1201	6.20716
ENST00000531273	ENSG00000166181	API5	1868	protein_coding	mRNA	0.000996527	0.24788	1.63888	up	14.5497	15.2347	11.7436	22.1658	22.0143	24.5938
ENST00000531392	ENSG00000173227	SYT12	6028	retained_intron	lncRNA	0.00562014	0.367318	1.48355	up	1.26487	1.55537	1.15485	2.64168	2.4299	2.19373
ENST00000531394	ENSG00000109920	FNBP4	605	processed_transcript	lncRNA	0.00751882	0.367318	1.3944	up	0.516999	0.646689	0.343246	1.19958	0.913278	1.10204
ENST00000531439	ENSG00000137693	YAP1	1490	protein_coding	mRNA	0.0140273	0.367318	1.76002	up	1.35881	1.88184	2.26941	3.65007	4.6214	3.7756
ENST00000531776	ENSG00000166689	PLEKHA7	3591	retained_intron	lncRNA	0.0353749	0.522436	1.26287	up	0.430097	0.312561	0.319517	0.647895	0.877244	0.606489
ENST00000531912	ENSG00000185507	IRF7	806	retained_intron	lncRNA	0.0147444	0.367318	1.78662	up	0.168974	0.345346	0.117913	0.961515	1.58223	0.933744
ENST00000531992	ENSG00000178719	GRINA	597	retained_intron	lncRNA	0.0456515	0.587814	1.22363	up	0.106425	0	0.279839	0.505329	0.419859	0.257584
ENST00000532047	ENSG00000152219	ARL14EP	587	retained_intron	lncRNA	0.038754	0.546294	1.50595	up	0	0.432541	0	0.523417	0.715214	0.798055
ENST00000532417	ENSG00000135374	ELF5	2330	protein_coding	mRNA	0.0407435	0.55994	1.26464	up	0.060517	0.309176	0.034411	0.444315	0.33502	0.46634
ENST00000532480	ENSG00000145002	FAM86B2	447	protein_coding	mRNA	0.0262478	0.446227	1.43305	up	0.299285	0.143345	0.568423	1.1405	0.664524	1.01376
ENST00000532503	ENSG00000135372	NAT10	556	processed_transcript	lncRNA	0.0374624	0.537317	1.25889	up	1.25348	1.2156	0.819194	1.68253	1.34916	1.78419
ENST00000533114	ENSG00000167702	KIFC2	786	retained_intron	lncRNA	0.0498705	0.612285	1.44985	up	2.13835	3.54732	1.71106	3.35327	4.39204	3.70608
ENST00000533166	ENSG00000175334	BANF1	1135	protein_coding	mRNA	0.00409892	0.367318	1.25154	up	7.45454	7.11657	9.52753	10.1689	10.8971	10.0884
ENST00000533362	ENSG00000179950	PUF60	616	processed_transcript	lncRNA	0.00657754	0.367318	1.64461	up	0.640386	0.839834	0	1.42099	1.04528	1.47344
ENST00000533444	ENSG00000179091	CYC1	1832	retained_intron	lncRNA	0.0336562	0.509311	2.29435	up	2.46561	4.23451	11.0962	14.0164	12.4852	14.2957
ENST00000533465	ENSG00000173442	EHBP1L1	793	protein_coding	mRNA	0.0415773	0.564894	1.37787	up	0.246778	0.225988	0	0.334145	0.679824	0.722265
ENST00000533538	ENSG00000141279	NPEPPS	1281	retained_intron	lncRNA	0.000189344	0.109706	1.46383	up	0.369501	0.454175	0.309566	1.03233	1.00472	0.98063
ENST00000533675	ENSG00000110274	CEP164	4761	retained_intron	lncRNA	0.0164407	0.367318	1.45247	up	0.648558	0.491888	0.616799	1.21212	1.59887	1.13545
ENST00000533706	ENSG00000110274	CEP164	5035	processed_transcript	lncRNA	0.0257524	0.441438	1.52105	up	0.232832	0.008387	0.667787	0.984396	0.723405	1.28937
ENST00000533738	ENSG00000070081	NUCB2	534	protein_coding	mRNA	0.00112176	0.264253	1.69693	up	0.51984	0.364665	0.578918	1.52274	1.66567	1.4227
ENST00000533752	ENSG00000182704	TSKU	643	protein_coding	mRNA	0.0112108	0.367318	1.44133	up	27.6803	25.4326	29.0629	40.4916	36.2779	43.8556
ENST00000533764	ENSG00000187954	CYHR1	853	protein_coding	mRNA	0.0164675	0.367318	1.48325	up	0.602623	0.728834	0.310247	0.980658	1.54602	1.25258
ENST00000533871	ENSG00000080854	IGSF9B	5050	protein_coding	mRNA	0.0309921	0.488538	1.68019	up	0.218535	0.719291	0.81301	1.51523	1.7567	1.66553
ENST00000533962	ENSG00000132746	ALDH3B2	585	processed_transcript	lncRNA	0.0185139	0.372453	1.54972	up	0.619498	1.04603	0.139681	1.59837	1.06007	1.4209
ENST00000534114	ENSG00000118096	IFT46	774	protein_coding	mRNA	0.0218422	0.406955	1.23662	up	0	0	0	0.267987	0.308647	0.140039
ENST00000534194	ENSG00000173599	PC	512	processed_transcript	lncRNA	0.00992227	0.367318	1.22123	up	0.176728	0.177673	0.310906	0.421185	0.524723	0.552689
ENST00000534279	ENSG00000160710	ADAR	849	retained_intron	lncRNA	0.0201194	0.388323	1.24189	up	1.10755	0.968118	0.754738	1.39096	1.50917	1.27347
ENST00000534437	ENSG00000143401	ANP32E	616	protein_coding	mRNA	0.020213	0.389431	1.46721	up	0.077028	0.106056	0.140653	0.879677	0.478774	0.556039
ENST00000534645	ENSG00000173653	RCE1	300	processed_transcript	lncRNA	0.00698824	0.367318	1.28973	up	0.256859	0.347154	0.244892	0.743615	0.600394	0.606648
ENST00000534931	ENSG00000140853	NLRC5	549	retained_intron	lncRNA	0.00918395	0.367318	1.52737	up	0	0	0	0.724073	0.421096	0.4561
ENST00000535094	ENSG00000126217	MCF2L	3752	protein_coding	mRNA	0.0144193	0.367318	2.00118	up	1.04306	0.61359	0.825948	2.28938	2.34051	3.41958
ENST00000535147	ENSG00000167986	DDB1	2789	retained_intron	lncRNA	0.0458979	0.589251	1.64677	up	0	0.280146	0	0.523798	1.22908	0.635693
ENST00000535601	ENSG00000102241	HTATSF1	3019	protein_coding	mRNA	0.0108771	0.367318	1.31572	up	4.8278	5.10045	6.99938	8.29777	7.44188	7.64526
ENST00000535622	ENSG00000100150	DEPDC5	5155	protein_coding	mRNA	0.0198347	0.385748	1.95851	up	0	0	0	1.52938	0.716469	0.734919
ENST00000535739	ENSG00000111321	LTBR	928	retained_intron	lncRNA	0.0199675	0.387078	1.25528	up	0.586221	0.495871	0.361917	0.769948	0.788405	0.982215
ENST00000535849	ENST00000535849	DDX11L8-001	366	unprocessed_pseudogene	lncRNA	0.0400278	0.554852	1.22584	up	0.304163	0.136993	0.294202	0.597839	0.580377	0.420129
ENST00000536161	ENSG00000185504	FAAP100	924	protein_coding	mRNA	0.00361505	0.367318	1.24303	up	0.559602	0.603255	0.288841	0.865524	0.747449	0.83624
ENST00000536178	ENSG00000160999	SH2B2	2113	protein_coding	mRNA	0.0224291	0.41078	1.20506	up	6.9814	6.86559	6.60051	7.75096	8.56514	8.90576
ENST00000536201	ENSG00000165819	METTL3	1592	retained_intron	lncRNA	0.0448227	0.583006	1.29584	up	0.889356	0.754454	1.16847	1.27616	1.84393	1.48804
ENST00000536649	ENSG00000072062	PRKACA	1524	retained_intron	lncRNA	0.0431746	0.573865	1.33702	up	0.576692	0.355912	2.47588	1.52423	1.61978	2.09788
ENST00000536803	ENSG00000132740	IGHMBP2	444	processed_transcript	lncRNA	0.041289	0.563189	1.65358	up	0	0	0.505579	1.11054	1.27755	0.514154
ENST00000537763	ENSG00000146955	RAB19	952	protein_coding	mRNA	0.029606	0.47648	1.28191	up	0.301495	0.438314	0.201621	0.748486	0.506819	0.756912
ENST00000538751	ENSG00000165458	INPPL1	4656	protein_coding	mRNA	0.0159756	0.367318	2.28227	up	5.16282	5.28533	6.18381	10.5917	14.3926	17.9086
ENST00000538857	ENSG00000008394	MGST1	535	processed_transcript	lncRNA	0.0096208	0.367318	1.23483	up	0.017942	0.090701	0.000145	0.322749	0.289753	0.213343
ENST00000539611	ENSG00000134287	ARF3	576	protein_coding	mRNA	0.00893106	0.367318	1.35774	up	0.525017	0.568242	0.386405	0.957778	1.19202	0.898171
ENST00000539637	ENSG00000115170	ACVR1	564	protein_coding	mRNA	0.0227697	0.413875	1.3426	up	0	0.068616	0.013283	0.437432	0.473036	0.231904
ENST00000540118	ENSG00000120647	CCDC77	389	retained_intron	lncRNA	0.0264753	0.448377	1.28416	up	0	0.036012	0.097186	0.219528	0.434911	0.38944
ENST00000540425	ENSG00000171940	ZNF217	568	processed_transcript	lncRNA	0.0276751	0.458522	1.33058	up	1.11894	0.717402	0.891415	1.59773	1.47924	1.53043
ENST00000540683	ENSG00000111665	CDCA3	985	protein_coding	mRNA	0.00353422	0.367318	1.98514	up	0.678218	1.45386	0.129404	2.13695	2.35368	2.11189
ENST00000540772	ENSG00000139433	GLTP	560	protein_coding	mRNA	0.0288263	0.46982	1.3038	up	0	0	0.131101	0.252351	0.517334	0.344506
ENST00000541442	ENSG00000140688	C16orf58	1056	retained_intron	lncRNA	0.00175248	0.328096	1.39432	up	0.103328	0.140418	0.273883	0.584121	0.679461	0.664654
ENST00000541568	ENSG00000100865	CINP	572	protein_coding	mRNA	0.0146819	0.367318	1.50511	up	0.059412	0.241574	0	0.551947	0.843579	0.525492
ENST00000541623	ENSG00000186635	ARAP1	533	retained_intron	lncRNA	0.026099	0.444644	1.213	up	0.285944	0.494623	0.175753	0.514974	0.661954	0.552515
ENST00000541650	ENSG00000118507	AKAP7	2008	protein_coding	mRNA	0.0181211	0.368443	1.34575	up	0	0.187593	0	0.337832	0.509694	0.405475
ENST00000541756	ENSG00000165458	INPPL1	4656	protein_coding	mRNA	0.0160356	0.367318	2.28038	up	5.19735	5.28533	6.22787	10.6342	14.4217	17.9913
ENST00000542156	ENSG00000063601	MTMR1	1227	protein_coding	mRNA	0.0357136	0.525385	1.79336	up	1.70979	1.83807	1.16441	3.93079	4.41542	2.4542
ENST00000542515	ENSG00000149716	ORAOV1	2299	processed_transcript	lncRNA	0.0013023	0.284228	1.45803	up	0.388815	0.317416	0.505969	0.984513	1.02989	1.15952
ENST00000542651	ENSG00000185989	RASA3	975	processed_transcript	lncRNA	0.026526	0.448532	1.27245	up	0.639613	0.851851	1.07128	1.33529	1.30686	1.46364
ENST00000542809	ENSG00000104866	PPP1R37	554	processed_transcript	lncRNA	0.00412752	0.367318	1.75571	up	0	0	0	0.844637	0.887317	0.555489
ENST00000542896	ENSG00000071994	PDCD2	1082	protein_coding	mRNA	0.0465965	0.592752	1.20954	up	6.31867	5.61418	5.88993	6.77144	7.51384	7.92528
ENST00000543033	ENSG00000149930	TAOK2	4072	protein_coding	mRNA	0.00830195	0.367318	1.50205	up	0.237089	0.12815	0	0.525217	0.724342	0.75392
ENST00000543189	ENSG00000171681	ATF7IP	4887	protein_coding	mRNA	0.00670611	0.367318	1.27316	up	0.929647	0.944706	1.84792	1.85993	1.81835	1.91042
ENST00000543196	ENSG00000139629	GALNT6	5207	protein_coding	mRNA	0.0360762	0.528441	1.24238	up	24.9945	23.7875	23.1795	32.0261	27.1595	30.9391
ENST00000543234	ENSG00000165458	INPPL1	275	protein_coding	mRNA	0.000545486	0.191004	1.28077	up	8.5536	8.33666	10.0194	12.2323	11.621	11.688
ENST00000543805	ENSG00000187630	DHRS4L2	1335	protein_coding	mRNA	0.0350354	0.519794	1.23191	up	0.073299	0	0	0.360236	0.170381	0.256839
ENST00000543867	ENSG00000126460	PRRG2	1583	retained_intron	lncRNA	0.00484	0.367318	1.45952	up	0	0	0.044203	0.509711	0.367401	0.583773
ENST00000544079	ENSG00000115484	CCT4	2261	protein_coding	mRNA	0.022565	0.412035	1.39727	up	3.37672	3.14726	11.2196	8.38877	8.26468	7.25807
ENST00000544134	ENSG00000215021	PHB2	652	processed_transcript	lncRNA	0.0020924	0.347551	1.24955	up	0.000675	0	0	0.222737	0.229516	0.298268
ENST00000544216	ENSG00000257103	LSM14A	3596	protein_coding	mRNA	0.0217594	0.406408	1.36317	up	7.79622	11.5325	3.78211	9.98942	8.88795	9.72103
ENST00000544329	ENSG00000226472	RP11-551L14.4	565	antisense	lncRNA	0.0232309	0.418553	1.25264	up	0	0	0	0.234059	0.363481	0.168043
ENST00000544692	ENSG00000177084	POLE	2221	retained_intron	lncRNA	0.0357088	0.525385	1.43279	up	0.216367	0.066193	0.142135	0.407189	0.716164	0.80909
ENST00000545184	ENSG00000149761	NUDT22	581	retained_intron	lncRNA	0.034532	0.515785	1.69083	up	0.870679	0.138713	1.35665	2.40043	1.70806	1.89213
ENST00000545197	ENSG00000171428	NAT1	1827	protein_coding	mRNA	0.0356932	0.525385	1.88928	up	0	0.006604	0	1.52191	0.511176	0.785017
ENST00000545322	ENSG00000176731	C8orf59	491	protein_coding	mRNA	0.031815	0.495396	1.40258	up	0.876869	1.07924	1.84595	2.58898	1.99883	2.014
ENST00000545336	ENSG00000123106	CCDC91	2738	protein_coding	mRNA	0.0226676	0.413084	1.82234	up	0.160366	0.086317	0.141551	1.1679	0.644753	1.45436
ENST00000545683	ENSG00000203814	HIST2H2BF	999	protein_coding	mRNA	0.037555	0.537946	1.3084	up	8.17639	8.40287	9.4921	12.3886	10.2268	12.7529
ENST00000545813	ENSG00000077458	FAM76B	625	retained_intron	lncRNA	0.0499018	0.612427	1.43379	up	0.340869	0.082058	0.042096	0.696266	0.797678	0.437606
ENST00000546123	ENSG00000181873	IBA57	853	processed_transcript	lncRNA	0.0110027	0.367318	1.34557	up	0.355099	0.159846	0.313758	0.726709	0.778282	0.658357
ENST00000546192	ENSG00000176383	B3GNT4	2749	protein_coding	mRNA	0.0411346	0.562001	1.28783	up	0.359616	0.060957	0.458755	0.627332	0.628001	0.762613
ENST00000546296	ENSG00000111321	LTBR	783	processed_transcript	lncRNA	0.0195411	0.382779	1.44371	up	0.04758	0.013691	0.06466	0.313939	0.618315	0.607633
ENST00000546360	ENSG00000070540	WIPI1	1575	protein_coding	mRNA	0.0418475	0.566892	1.9013	up	0	0.249993	0.784199	1.12119	2.24853	1.3783
ENST00000546361	ENSG00000085872	CHERP	4173	protein_coding	mRNA	0.0304257	0.483695	1.87352	up	7.00288	4.06496	9.4055	16.8585	12.9098	11.2755
ENST00000546645	ENSG00000123353	ORMDL2	897	retained_intron	lncRNA	0.0255645	0.439223	1.44703	up	1.18677	1.6004	2.12173	2.95405	2.54394	2.98894
ENST00000546789	ENSG00000257740	RP11-977G19.12	437	antisense	lncRNA	0.0272858	0.454793	1.32095	up	0.42677	0.28885	0.675122	0.835862	1.17743	0.842113
ENST00000546800	ENSG00000111331	OAS3	557	retained_intron	lncRNA	0.00228457	0.360274	1.31977	up	0	0	0.050386	0.414312	0.312921	0.311363
ENST00000546973	ENSG00000111331	OAS3	499	protein_coding	mRNA	0.0182366	0.36936	1.9779	up	0.439012	0	0.149707	1.2116	1.16935	1.67684
ENST00000547893	ENSG00000118412	CASP8AP2	2003	processed_transcript	lncRNA	0.00780361	0.367318	1.28118	up	1.70517	2.00121	0.357706	1.70184	1.634	1.88187
ENST00000548211	ENSG00000005175	RPAP3	555	processed_transcript	lncRNA	0.019525	0.382779	1.3782	up	0.014333	0.270561	0.081082	0.514874	0.547036	0.533705
ENST00000548350	ENSG00000110881	ASIC1	560	retained_intron	lncRNA	0.0287981	0.469801	1.26111	up	0.156036	0.391088	0.122442	0.518938	0.458817	0.59325
ENST00000548514	ENSG00000111331	OAS3	1392	protein_coding	mRNA	0.0109986	0.367318	2.68067	up	0.238355	0.290242	0.942076	3.1859	2.04935	4.01273
ENST00000548701	ENSG00000139620	KANSL2	922	processed_transcript	lncRNA	0.0219221	0.407241	1.27733	up	0.296503	0.136964	0.247115	0.643821	0.598343	0.470937
ENST00000548981	ENSG00000110925	CSRNP2	845	protein_coding	mRNA	0.0384398	0.54417	1.25653	up	0.672492	0.659441	0.626057	1.09562	0.874627	1.27075
ENST00000548989	ENSG00000182809	CRIP2	1976	processed_transcript	lncRNA	0.0116438	0.367318	2.01308	up	2.11504	3.42214	0.574269	5.36914	3.73963	4.062
ENST00000549010	ENSG00000186908	ZDHHC17	491	processed_transcript	lncRNA	0.021745	0.406218	1.3708	up	0.922022	0.78726	0.154577	0.977516	1.24529	1.13542
ENST00000549056	ENSG00000136044	APPL2	493	protein_coding	mRNA	0.0139049	0.367318	1.20152	up	1.15341	1.20881	1.0778	1.71879	1.45699	1.54589
ENST00000549114	ENSG00000103253	HAGHL	1820	protein_coding	mRNA	0.0198708	0.386183	1.29962	up	0.254357	0.085584	0.105718	0.513541	0.526828	0.424223
ENST00000549115	ENSG00000258289	CHURC1	2629	protein_coding	mRNA	0.0474971	0.597993	1.24974	up	1.92671	1.74796	1.86615	2.30126	2.437	2.9762
ENST00000549157	ENSG00000087470	DNM1L	556	retained_intron	lncRNA	0.0113063	0.367318	1.25797	up	0.437446	0.350639	0.100629	0.622213	0.599707	0.581331
ENST00000549177	ENSG00000139637	C12orf10	600	retained_intron	lncRNA	0.034821	0.517754	1.2956	up	0.334719	0.463652	0.388395	0.619184	0.862035	0.946807
ENST00000549219	ENSG00000166783	KIAA0430	581	protein_coding	mRNA	0.0218058	0.406847	1.32314	up	0.014757	0.01595	0.514466	0.704233	0.588862	0.42561
ENST00000549240	ENSG00000140104	C14orf79	2503	protein_coding	mRNA	0.0028555	0.367318	1.54291	up	0.070505	0.171404	0.321799	0.813688	0.803303	0.906334
ENST00000549484	ENSG00000225210	DUXAP9	596	processed_transcript	lncRNA	0.0269539	0.451444	1.50615	up	2.14085	2.73118	2.22115	3.31781	4.49439	4.34799
ENST00000549899	ENSG00000059758	CDK17	506	retained_intron	lncRNA	0.0430742	0.573148	1.35568	up	0.047334	0.286718	0.197677	0.737153	0.466933	0.577824
ENST00000550029	ENSG00000257681	RP11-341G23.4	738	antisense	lncRNA	0.0299476	0.479529	1.25189	up	0.160278	0.083087	0.085512	0.472963	0.425569	0.271483
ENST00000550343	ENSG00000196531	NACA	343	processed_transcript	lncRNA	0.0165739	0.367318	1.39458	up	0.537092	0.409565	1e-06	0.775324	0.853935	0.682281
ENST00000550352	ENSG00000111670	GNPTAB	787	retained_intron	lncRNA	0.0420125	0.567651	1.20856	up	0.123176	0.196915	0.050932	0.283185	0.287655	0.482055
ENST00000550406	ENSG00000108774	RAB5C	500	protein_coding	mRNA	0.0161714	0.367318	1.70943	up	1.99686	1.00215	3.74982	5.21151	3.81515	4.36515
ENST00000551118	ENSG00000138346	DNA2	3468	protein_coding	mRNA	0.0131983	0.367318	1.28022	up	0.001193	0	0.420746	0.542871	0.370416	0.494201
ENST00000551209	ENSG00000139436	GIT2	2127	protein_coding	mRNA	0.0246705	0.431347	1.21725	up	0.141702	0.260841	0.349987	0.484363	0.573846	0.524123
ENST00000551338	ENSG00000108774	RAB5C	560	protein_coding	mRNA	0.0462465	0.591043	1.39284	up	0.086442	0.078798	0.18238	0.850173	0.376171	0.494578
ENST00000551416	ENSG00000075856	SART3	559	retained_intron	lncRNA	0.032471	0.500565	1.26166	up	0.75105	0.372395	1.5645	1.5208	1.18188	1.45889
ENST00000551925	ENSG00000135454	B4GALNT1	1003	retained_intron	lncRNA	0.0431208	0.573508	1.42285	up	0.710711	0.781156	0.36375	1.64433	0.959664	1.22089
ENST00000552206	ENSG00000187778	MCRS1	984	retained_intron	lncRNA	0.0438634	0.577932	1.21306	up	0.052048	0.099475	0.399483	0.393513	0.556404	0.387691
ENST00000552447	ENSG00000123066	MED13L	584	protein_coding	mRNA	7.16164e-05	0.0895009	1.28565	up	0.053705	0.043815	0.166689	0.396232	0.405189	0.414198
ENST00000552544	ENSG00000123395	ATG101	837	retained_intron	lncRNA	0.0346543	0.516839	1.44418	up	0.310655	0.211478	0.312966	0.571333	1.06649	0.947952
ENST00000552703	ENSG00000134294	SLC38A2	528	retained_intron	lncRNA	0.0241601	0.425966	1.23522	up	2.67694	3.00697	1.73572	3.1102	3.49859	2.8806
ENST00000552812	ENSG00000167535	CACNB3	1712	retained_intron	lncRNA	0.00794993	0.367318	1.64328	up	0	0	0.629237	0.806359	1.16896	0.994095
ENST00000552876	ENSG00000094914	AAAS	2016	retained_intron	lncRNA	0.0388867	0.546684	1.98824	up	1.04554	0.719869	0.203222	3.19004	1.75316	1.7072
ENST00000553338	ENSG00000119650	IFT43	684	processed_transcript	lncRNA	0.0115319	0.367318	1.87066	up	0.78289	0.287261	0.894617	2.44353	1.76737	2.12946
ENST00000553457	ENSG00000119599	DCAF4	2896	protein_coding	mRNA	0.0119905	0.367318	1.46541	up	0.679097	0.772283	0.48025	1.35829	1.65415	1.15735
ENST00000553790	ENSG00000100813	ACIN1	756	retained_intron	lncRNA	0.0208593	0.397708	1.24832	up	0.324104	0.30935	0.085861	0.427494	0.646275	0.510288
ENST00000554117	ENSG00000100941	PNN	624	retained_intron	lncRNA	0.0131253	0.367318	1.26047	up	0.526414	0.428493	0.961856	1.22456	0.932061	1.09186
ENST00000554163	ENSG00000197045	GMFB	682	retained_intron	lncRNA	0.0249396	0.433676	1.21809	up	0.056873	0.196217	0.001319	0.226973	0.33516	0.364901
ENST00000554271	ENSG00000050130	JKAMP	2137	protein_coding	mRNA	0.0499091	0.612427	1.38322	up	0.507313	0.809019	0.088129	0.664647	0.923866	1.27671
ENST00000554444	ENSG00000258947	TUBB3	1978	protein_coding	mRNA	0.00657009	0.367318	10.15	up	0.454964	0.320265	3.22652	11.8806	22.799	32.0439
ENST00000554455	ENSG00000092199	HNRNPC	1784	protein_coding	mRNA	0.0175961	0.367318	2.98404	up	36.0233	33.452	1.93378	37.4382	43.6827	37.7982
ENST00000554523	ENSG00000072121	ZFYVE26	8582	retained_intron	lncRNA	0.00538706	0.367318	1.40619	up	1.0776	0.904833	1.06315	1.98741	1.88476	1.65813
ENST00000554552	ENSG00000258425	CTD-2207P18.1	518	lincRNA	lncRNA	0.0365827	0.530864	1.24145	up	0.092138	0.188158	0	0.239315	0.476631	0.324248
ENST00000554772	ENSG00000140105	WARS	562	protein_coding	mRNA	0.0139492	0.367318	1.26834	up	0	0	0.103053	0.389284	0.218785	0.350974
ENST00000555108	ENSG00000258525	RP11-829H16.3	1991	antisense	lncRNA	0.03889	0.546684	1.2926	up	0.260413	0.320245	0.07604	0.736879	0.532753	0.410619
ENST00000555244	ENSG00000165934	CPSF2	806	protein_coding	mRNA	0.000914391	0.242135	1.28449	up	0	0	0	0.253204	0.324361	0.276614
ENST00000555284	ENSG00000140022	STON2	2362	retained_intron	lncRNA	0.000412602	0.161036	1.30667	up	0.019631	4.4e-05	0.10686	0.406529	0.340334	0.356683
ENST00000555348	ENSG00000100814	CCNB1IP1	505	processed_transcript	lncRNA	0.00336633	0.367318	1.281	up	0.118531	0.203055	0.096744	0.412938	0.507582	0.439857
ENST00000555524	ENSG00000258858	RP11-982M15.5	716	antisense	lncRNA	0.0273772	0.45554	1.22866	up	0.896543	1.04047	1.0864	1.54197	1.29782	1.58329
ENST00000555564	ENSG00000171456	ASXL1	658	retained_intron	lncRNA	0.00552601	0.367318	1.30666	up	0.739801	0.703045	0.42117	0.999853	1.07131	1.19937
ENST00000555576	ENSG00000258947	TUBB3	572	protein_coding	mRNA	0.0264981	0.448511	1.54442	up	0.080206	0	0.000157	0.450648	0.889246	0.445416
ENST00000555810	ENSG00000258947	TUBB3	767	protein_coding	mRNA	0.000277557	0.12991	1.88925	up	0.049327	0.02594	0.304835	1.11926	1.06573	1.24608
ENST00000556018	ENSG00000165929	TC2N	1770	protein_coding	mRNA	0.0392305	0.549328	1.30601	up	1.08404	1.41383	1.63234	2.36459	1.92624	2.06334
ENST00000556184	ENSG00000100650	SRSF5	2443	retained_intron	lncRNA	0.0195451	0.382779	1.2843	up	2.45777	2.77753	2.60499	3.67293	3.30539	3.94308
ENST00000556345	ENSG00000072415	MPP5	1163	protein_coding	mRNA	0.0286474	0.468093	1.30746	up	0.165847	0.198116	0.081067	0.385755	0.676867	0.429615
ENST00000556451	ENSG00000151338	MIPOL1	2282	protein_coding	mRNA	0.0466655	0.592769	1.24318	up	0.054396	0.058426	0.106943	0.297718	0.233744	0.49286
ENST00000556728	ENSG00000227051	C14orf132	774	lincRNA	lncRNA	0.0211048	0.400213	1.23537	up	0.144298	0.055491	0	0.247082	0.304321	0.381374
ENST00000556807	ENSG00000140153	WDR20	2382	protein_coding	mRNA	0.0145522	0.367318	1.52883	up	0.247577	0.271825	0.591327	0.852741	1.29611	1.198
ENST00000556816	ENSG00000165898	ISCA2	2626	protein_coding	mRNA	0.000667387	0.208054	2.33634	up	2.24855	2.11467	2.2253	7.2244	6.24787	6.01315
ENST00000557260	ENSG00000156411	C14orf2	856	retained_intron	lncRNA	0.0118411	0.367318	1.21466	up	0.307966	0.524467	0.020498	0.461224	0.585775	0.486476
ENST00000557309	ENSG00000100605	ITPK1	770	protein_coding	mRNA	7.54493e-05	0.0895009	1.32046	up	0	0	0	0.307447	0.313118	0.340905
ENST00000557343	ENSG00000258745	RP11-218E20.5	535	antisense	lncRNA	0.00780608	0.367318	1.2141	up	0.135599	0.209106	0.127872	0.36542	0.375629	0.463338
ENST00000557379	ENSG00000136319	TTC5	682	retained_intron	lncRNA	0.0208746	0.397836	1.29629	up	0.146333	0.153252	0.368234	0.456347	0.693414	0.641134
ENST00000557383	ENSG00000198208	RPS6KL1	595	retained_intron	lncRNA	0.00858183	0.367318	1.44014	up	0.000291	0	0.23602	0.460561	0.710562	0.528334
ENST00000557394	ENSG00000092201	SUPT16H	2324	retained_intron	lncRNA	0.000920165	0.242135	1.57849	up	0.630652	0.485762	0.57187	1.53285	1.40275	1.47245
ENST00000557543	ENSG00000172590	MRPL52	2020	retained_intron	lncRNA	0.00487942	0.367318	1.60995	up	0.282188	0.154752	0.250049	0.807637	1.04351	1.10438
ENST00000557894	ENSG00000213928	IRF9	1391	protein_coding	mRNA	0.0250111	0.433784	3.88469	up	0.22072	0.64323	0.358423	4.77089	2.29144	7.28235
ENST00000557982	ENSG00000166821	PEX11A	646	processed_transcript	lncRNA	0.0209983	0.398925	1.35272	up	0.041965	0.006744	0	0.499177	0.401514	0.233507
ENST00000558216	ENSG00000117971	CHRNB4	578	processed_transcript	lncRNA	0.0485157	0.604009	1.48026	up	0.095125	0.199976	0.441461	0.536204	1.06154	1.00353
ENST00000558287	ENSG00000074410	CA12	561	retained_intron	lncRNA	0.0192392	0.380178	1.4448	up	1.62841	1.44507	1.19569	2.91113	2.28577	2.24693
ENST00000558342	ENSG00000259442	RP11-752G15.8	1091	antisense	lncRNA	0.0216148	0.405748	1.28436	up	1.32775	1.95838	0.060454	1.24995	1.63014	1.24309
ENST00000558381	ENSG00000100918	REC8	405	retained_intron	lncRNA	0.0257423	0.441328	1.54412	up	0.289928	0.406734	0.55992	0.88572	1.25486	1.49888
ENST00000558401	ENSG00000166710	B2M	1715	protein_coding	mRNA	0.0320652	0.497224	3.16098	up	18.2766	20.1624	15.2668	37.056	93.5948	54.8382
ENST00000558692	ENSG00000255571	MIR9-3HG	551	lincRNA	lncRNA	0.0104606	0.367318	1.39308	up	0	0	0.191766	0.441011	0.404886	0.636341
ENST00000559082	ENSG00000041357	PSMA4	1094	protein_coding	mRNA	0.0135991	0.367318	5.13982	up	3.98105	4.08185	6.93971	41.5466	37.4855	16.9909
ENST00000559100	ENSG00000104064	GABPB1	290	retained_intron	lncRNA	0.0448113	0.582996	1.45069	up	0.475353	0.262803	0.503468	1.26341	1.24375	0.720079
ENST00000559206	ENSG00000137831	UACA	1740	retained_intron	lncRNA	0.00576899	0.367318	1.37359	up	0.004972	0.0209	0.008457	0.391714	0.29794	0.482635
ENST00000559365	ENSG00000041357	PSMA4	786	protein_coding	mRNA	0.0135608	0.367318	10.4844	up	0.687384	1.56281	0.976064	29.3797	30.3005	9.18979
ENST00000559596	ENSG00000137804	NUSAP1	1629	protein_coding	mRNA	0.00328598	0.367318	1.63185	up	9.05476	12.5901	0.792397	7.37988	8.56467	8.72578
ENST00000559617	ENSG00000137843	PAK6	598	protein_coding	mRNA	0.0325034	0.500843	1.31999	up	0.226092	0.543562	0.242034	0.71592	0.678803	0.833214
ENST00000559898	ENSG00000184508	HDDC3	1024	protein_coding	mRNA	0.0181184	0.368443	1.31168	up	0.826369	0.62714	1.05414	1.66464	1.34169	1.28096
ENST00000560067	ENSG00000259248	USP3-AS1	366	antisense	lncRNA	0.00320784	0.367318	1.27332	up	0	0	0	0.271696	0.222236	0.328165
ENST00000560173	ENSG00000130164	LDLR	389	retained_intron	lncRNA	0.00908914	0.367318	1.40699	up	0.307805	0.47479	0	0.677365	0.885552	0.605193
ENST00000560205	ENSG00000140157	NIPA2	589	processed_transcript	lncRNA	0.00579916	0.367318	1.48524	up	0.492023	0.829066	0.194743	1.07264	1.31728	1.09778
ENST00000560420	ENSG00000092010	PSME1	922	retained_intron	lncRNA	0.0428343	0.571442	1.66948	up	0.191296	0.547361	0.220543	1.70716	0.934732	0.954236
ENST00000560573	ENSG00000172183	ISG20	2698	retained_intron	lncRNA	0.0273083	0.455024	1.33676	up	0.239157	0.482687	0.242589	0.814094	0.83457	0.608004
ENST00000560647	ENSG00000259354	RP11-519G16.3	702	antisense	lncRNA	0.0356511	0.52513	1.20519	up	0	0	0	0.109313	0.290601	0.221677
ENST00000560935	ENSG00000196497	IPO4	701	retained_intron	lncRNA	0.00927453	0.367318	1.36524	up	0.30102	0.218657	0.238617	0.607984	0.844338	0.68283
ENST00000561059	ENSG00000092010	PSME1	947	retained_intron	lncRNA	0.0146793	0.367318	1.68411	up	0.672204	0.331214	0.530053	1.88445	1.354	1.4251
ENST00000561142	ENSG00000092010	PSME1	865	retained_intron	lncRNA	0.000877825	0.238499	15.194	up	4.83452	3.18383	4.48091	76.5096	59.7656	101.277
ENST00000561293	ENSG00000105419	MEIS3	1918	protein_coding	mRNA	0.0437144	0.577238	1.35125	up	0.26041	0.043265	0.17392	0.448941	0.515245	0.749421
ENST00000561318	ENSG00000259438	CTD-2650P22.1	865	lincRNA	lncRNA	0.0402712	0.556744	1.26627	up	0.368368	0.320025	0.091656	0.431005	0.733787	0.560838
ENST00000561435	ENSG00000092010	PSME1	945	protein_coding	mRNA	0.0184298	0.371511	8.3538	up	0.675805	2.33436	1.19114	24.1368	8.65754	27.5275
ENST00000561536	ENSG00000158805	ZNF276	1947	retained_intron	lncRNA	0.0190285	0.378234	1.39941	up	0.706056	0.564348	1.15783	1.37943	1.42094	1.87022
ENST00000561605	ENSG00000153815	CMIP	407	retained_intron	lncRNA	0.0178317	0.367318	1.24998	up	0.173313	0.258869	0.264463	0.589717	0.600195	0.440602
ENST00000562204	ENSG00000176715	ACSF3	581	processed_transcript	lncRNA	0.0496309	0.611054	1.44316	up	0.644972	1.2524	1.15205	1.97994	1.76078	1.93931
ENST00000562646	ENSG00000147274	RBMX	2148	protein_coding	mRNA	0.00244849	0.367318	1.36483	up	6.95496	6.3276	8.63049	10.1121	11.007	10.1281
ENST00000562751	ENSG00000069943	PIGB	753	retained_intron	lncRNA	0.0474787	0.597887	1.28009	up	0.096651	0.05787	0.020854	0.5009	0.364718	0.205056
ENST00000562831	ENSG00000141012	GALNS	609	protein_coding	mRNA	0.034101	0.512477	1.43928	up	0	0.267525	0.418766	0.833806	0.761084	0.711776
ENST00000562850	ENSG00000103479	RBL2	745	retained_intron	lncRNA	0.0250041	0.433784	1.59869	up	0.332434	0.801062	0.758595	1.52033	1.54585	1.71763
ENST00000562895	ENSG00000137876	RSL24D1	435	processed_transcript	lncRNA	0.019358	0.381305	1.20772	up	0	0	0	0.126232	0.265082	0.235489
ENST00000563145	ENSG00000162066	AMDHD2	859	retained_intron	lncRNA	0.0301538	0.48116	1.33785	up	0.57758	0.697604	0.802451	1.41879	1.01871	1.40046
ENST00000563243	ENSG00000261744	RP11-21B21.4	733	antisense	lncRNA	0.00926268	0.367318	1.20573	up	0.716056	0.780893	0.710255	1.17615	0.996	1.10037
ENST00000563290	ENSG00000140386	SCAPER	5028	protein_coding	mRNA	0.0290613	0.471415	1.41356	up	2.64319	3.91552	1.92793	3.64978	4.48666	4.41717
ENST00000563785	ENSG00000167508	MVD	888	retained_intron	lncRNA	0.00806533	0.367318	1.25849	up	0.100751	0.134846	0.089139	0.477738	0.365771	0.337698
ENST00000563985	ENSG00000125148	MT2A	688	processed_transcript	lncRNA	0.00129075	0.283776	1.44986	up	0.193343	0.226921	0.201659	0.721657	0.840489	0.68877
ENST00000563992	ENSG00000183044	ABAT	1870	retained_intron	lncRNA	0.0191392	0.378925	1.21099	up	0.130612	0.297451	0.044347	0.432743	0.377768	0.340832
ENST00000564276	ENSG00000067225	PKM	753	retained_intron	lncRNA	0.0479732	0.600768	1.24247	up	4.47228	4.51569	3.68759	6.0067	4.79028	5.52444
ENST00000564348	ENSG00000260001	TGFBR3L	719	processed_transcript	lncRNA	0.0376706	0.538981	1.20816	up	0.194945	0.140751	0.022434	0.333115	0.440326	0.254739
ENST00000564428	ENSG00000140464	PML	1985	protein_coding	mRNA	0.0270542	0.452616	1.88294	up	1.60664	0.787038	0.955071	2.4563	2.92587	3.45323
ENST00000564744	ENSG00000174444	RPL4	671	retained_intron	lncRNA	0.015241	0.367318	1.32167	up	2.29309	2.12308	2.33209	3.02093	3.69686	3.21896
ENST00000565315	ENSG00000261183	RP11-532F12.5	629	antisense	lncRNA	0.0341941	0.513105	1.61157	up	0.565673	1.52743	0	1.73596	1.37309	1.25449
ENST00000565377	ENSG00000007376	RPUSD1	940	protein_coding	mRNA	0.0212041	0.401118	1.22988	up	0.384804	0.408293	0.232061	0.511062	0.740312	0.66373
ENST00000565412	ENSG00000166747	AP1G1	619	protein_coding	mRNA	0.00465781	0.367318	1.21401	up	0.107548	0.19201	0.127336	0.406241	0.385604	0.359767
ENST00000565416	ENSG00000261801	LOXL1-AS1	588	antisense	lncRNA	0.0424546	0.569781	1.23136	up	0	0	0.272918	0.296328	0.490038	0.27863
ENST00000565898	ENSG00000140464	PML	5393	protein_coding	mRNA	0.00673324	0.367318	1.55189	up	0.967033	0.779157	0.72628	2.04845	1.80768	1.61422
ENST00000565940	ENSG00000129636	ITFG1	2663	protein_coding	mRNA	0.00201554	0.340665	2.07953	up	0	0	0.445206	1.63378	1.14398	1.44419
ENST00000565986	ENSG00000179889	PDXDC1	561	retained_intron	lncRNA	0.0121852	0.367318	1.44533	up	0.391765	0.699243	0.310116	0.936956	1.10773	1.21823
ENST00000566347	ENSG00000128973	CLN6	981	protein_coding	mRNA	0.0408887	0.560442	1.31908	up	0.330366	0.587801	0.722032	0.99524	1.17246	0.968623
ENST00000566802	ENSG00000214331	RP11-252A24.2	2320	retained_intron	lncRNA	0.008788	0.367318	1.25005	up	3.2625	3.97265	1.4905	3.17828	3.69741	3.73387
ENST00000566851	ENSG00000182841	RRP7BP	833	transcribed_unprocessed_pseudogene	lncRNA	0.0468454	0.593468	1.2267	up	1.32584	1.25471	1.01278	1.7729	1.41954	1.84795
ENST00000566922	ENSG00000260646	LA16c-385E7.1	682	lincRNA	lncRNA	0.0205643	0.393801	1.37199	up	0.180368	0.276304	0.329904	0.646135	0.932307	0.643219
ENST00000567008	ENSG00000167962	ZNF598	815	retained_intron	lncRNA	0.021104	0.400213	1.27934	up	0.161523	0.12689	0.132874	0.347069	0.45216	0.584772
ENST00000567111	ENSG00000167967	E4F1	691	retained_intron	lncRNA	0.0245106	0.429931	1.28533	up	0.070031	0.189564	0.110216	0.375344	0.382348	0.568541
ENST00000567128	ENSG00000172831	CES2	440	retained_intron	lncRNA	0.0457123	0.588137	1.23964	up	0	0.053246	0.182393	0.256412	0.479206	0.303074
ENST00000567314	ENSG00000167186	COQ7	584	processed_transcript	lncRNA	0.0422889	0.568707	1.30791	up	0.136264	0	0.013877	0.522049	0.3352	0.264317
ENST00000567676	ENSG00000103507	BCKDK	554	protein_coding	mRNA	0.000572343	0.191004	1.94525	up	0.386441	0.461703	0.624559	1.78544	2.05315	1.90494
ENST00000567974	ENSG00000137817	PARP6	1950	protein_coding	mRNA	0.00153755	0.312254	1.46645	up	0.382871	0.391807	0.430763	1.1819	1.02426	0.976833
ENST00000567982	ENSG00000102978	POLR2C	1135	retained_intron	lncRNA	0.0212393	0.40153	1.27938	up	0.11036	0.132155	0.072166	0.487602	0.282366	0.468823
ENST00000568396	ENSG00000102898	NUTF2	1179	protein_coding	mRNA	0.00261911	0.367318	3.67259	up	0.310671	0.787504	0.593468	3.92899	4.7482	5.49928
ENST00000568424	ENSG00000103034	NDRG4	564	protein_coding	mRNA	0.0411182	0.561841	1.32324	up	0	0	0.110246	0.480527	0.477883	0.196624
ENST00000568546	ENSG00000183751	TBL3	6803	protein_coding	mRNA	0.0224019	0.410647	1.22935	up	5.56548	6.37183	6.56611	7.62214	7.83244	8.02217
ENST00000568693	ENSG00000205250	E2F4	596	retained_intron	lncRNA	0.00964543	0.367318	1.42933	up	0.573981	0.810212	0.837385	1.44453	1.61784	1.4113
ENST00000568983	ENSG00000187741	FANCA	726	retained_intron	lncRNA	0.00240668	0.367212	1.31318	up	0.300222	0.255609	0.059192	0.576039	0.567031	0.540167
ENST00000569436	ENSG00000102898	NUTF2	1119	protein_coding	mRNA	0.0268645	0.45089	3.8098	up	2.88745	5.90033	9.74335	22.3847	36.3996	19.1294
ENST00000569548	ENSG00000125170	DOK4	1848	protein_coding	mRNA	0.00113389	0.26566	1.49856	up	0.137124	0.114576	0	0.635581	0.537557	0.665214
ENST00000569599	ENSG00000135698	MPHOSPH6	619	retained_intron	lncRNA	0.00898882	0.367318	1.3289	up	0.561827	0.515204	0.038114	0.69973	0.831766	0.739243
ENST00000569762	ENSG00000156873	PHKG2	880	retained_intron	lncRNA	0.0371038	0.535249	1.76486	up	1.65125	1.79568	0.795046	4.03611	2.20504	3.23963
ENST00000569878	ENSG00000188266	HYKK	4097	protein_coding	mRNA	0.010268	0.367318	1.62537	up	0.049404	0.03494	0.021222	0.484241	0.907893	0.674982
ENST00000569897	ENSG00000137842	TMEM62	745	retained_intron	lncRNA	0.0496505	0.611054	1.37216	up	0.220889	0.204577	0.433685	0.504432	0.954473	0.900626
ENST00000569918	ENSG00000158792	SPATA2L	692	protein_coding	mRNA	0.0273367	0.455311	1.3455	up	4.72328	5.78832	6.24482	8.21461	7.97806	7.45129
ENST00000570110	ENSG00000140525	FANCI	528	retained_intron	lncRNA	0.0396995	0.552601	1.29412	up	0.688145	0.75774	0.422016	1.21921	1.18378	0.829071
ENST00000570137	ENSG00000166446	CDYL2	8159	protein_coding	mRNA	0.00741235	0.367318	1.21997	up	2.68741	2.76263	2.60081	3.60001	3.25729	3.60512
ENST00000570213	ENSG00000140464	PML	371	retained_intron	lncRNA	0.00277395	0.367318	1.51114	up	0.245975	0.189901	0.474895	0.861191	1.11396	0.979304
ENST00000570330	ENSG00000129235	TXNDC17	459	protein_coding	mRNA	0.0181302	0.368463	1.85258	up	3.8035	6.24922	3.69977	8.91593	8.13394	9.94018
ENST00000570425	ENSG00000059122	FLYWCH1	721	protein_coding	mRNA	0.00400487	0.367318	1.4039	up	0.342629	0.282608	0.163808	0.726244	0.690258	0.866269
ENST00000570513	ENSG00000136436	CALCOCO2	553	protein_coding	mRNA	0.0474702	0.597887	1.27929	up	0.300698	0.219065	0.281442	0.491398	0.560638	0.834633
ENST00000570845	ENSG00000074370	ATP2A3	604	protein_coding	mRNA	0.0262829	0.446508	1.22179	up	0	0	0	0.148724	0.197991	0.324388
ENST00000571976	ENSG00000189067	LITAF	548	protein_coding	mRNA	0.0128631	0.367318	1.50015	up	1.03421	0.672056	0.983904	1.65088	1.86355	2.05172
ENST00000572232	ENSG00000153406	NMRAL1	659	protein_coding	mRNA	0.0294305	0.474739	1.25853	up	0.38218	0.592463	0.357196	0.718747	0.94371	0.749049
ENST00000572346	ENSG00000182446	NPLOC4	567	processed_transcript	lncRNA	0.0149901	0.367318	1.22679	up	0	0	0	0.152723	0.301005	0.230382
ENST00000572392	ENSG00000185359	HGS	824	protein_coding	mRNA	0.0203762	0.391193	1.24668	up	0.056492	0	0.121677	0.419814	0.339296	0.227491
ENST00000572904	ENSG00000120071	KANSL1	5014	protein_coding	mRNA	0.0100453	0.367318	1.26433	up	3.34824	3.25507	2.7519	3.91345	4.09181	4.48644
ENST00000572931	ENSG00000158486	DNAH3	1651	retained_intron	lncRNA	0.0286286	0.468039	1.98411	up	0	0	0.433831	0.727903	1.77352	1.46937
ENST00000572992	ENSG00000175643	RMI2	934	processed_transcript	lncRNA	0.000730831	0.217291	3.33506	up	0.622928	0.474111	0.47553	4.67762	3.52727	4.07587
ENST00000573175	ENSG00000132382	MYBBP1A	898	retained_intron	lncRNA	0.0276022	0.457821	1.27076	up	0.227567	0.290854	0.096002	0.362047	0.587533	0.607727
ENST00000573645	ENSG00000169180	XPO6	509	processed_transcript	lncRNA	0.04649	0.592349	1.20492	up	0.397347	0.341487	0.205595	0.521395	0.483046	0.718035
ENST00000574167	ENSG00000132382	MYBBP1A	746	retained_intron	lncRNA	0.0363187	0.52964	1.3627	up	0.275166	0.197848	0	0.443503	0.456749	0.77829
ENST00000574308	ENSG00000197879	MYO1C	403	retained_intron	lncRNA	0.0331969	0.506349	1.42202	up	0.190909	0.535668	0.387121	0.822915	1.05393	0.940474
ENST00000574740	ENSG00000005339	CREBBP	523	retained_intron	lncRNA	0.00170158	0.325172	1.33712	up	0.095214	0.05353	0.000127	0.406627	0.43338	0.354335
ENST00000574944	ENSG00000167302	ENTHD2	769	retained_intron	lncRNA	0.0133177	0.367318	1.22255	up	0	0.0006	0.326039	0.444808	0.346963	0.304361
ENST00000575042	ENSG00000122390	NAA60	328	processed_transcript	lncRNA	0.0270216	0.452324	1.23473	up	0.113718	0.176626	0.035102	0.257374	0.470939	0.355138
ENST00000575864	ENSG00000197879	MYO1C	601	retained_intron	lncRNA	0.0262534	0.446259	1.22882	up	0	0.046001	0.154024	0.22645	0.341414	0.385243
ENST00000576384	ENSG00000183011	NAA38	424	protein_coding	mRNA	0.0343336	0.514197	1.21924	up	2.19477	1.74981	2.73182	2.71061	3.18317	2.98763
ENST00000577645	ENSG00000125450	NUP85	869	retained_intron	lncRNA	0.0067493	0.367318	1.36089	up	1.02994	1.39071	0.14512	1.46655	1.27761	1.23483
ENST00000577700	ENSG00000232956	SNHG15	3116	lincRNA	lncRNA	0.0222431	0.409459	1.33065	up	0.94324	0.688092	0.839352	1.23774	1.53309	1.52255
ENST00000577922	ENSG00000108654	DDX5	996	protein_coding	mRNA	0.044141	0.579444	2.37752	up	1.50277	3.97736	4.16203	9.39814	8.51755	8.10352
ENST00000578172	ENSG00000166579	NDEL1	3927	retained_intron	lncRNA	0.00408734	0.367318	1.43193	up	0.063853	0.070828	0.747148	0.826047	0.883766	0.838393
ENST00000578240	ENSG00000178971	CTC1	1653	retained_intron	lncRNA	0.0193902	0.381437	1.36497	up	0.263357	0.301316	0.333598	0.632486	0.73271	0.980075
ENST00000578919	ENSG00000178927	C17orf62	841	protein_coding	mRNA	0.0333829	0.507675	1.54307	up	0.526919	0.108712	0.420716	0.898652	1.09272	1.27484
ENST00000578943	ENSG00000198720	ANKRD13B	743	retained_intron	lncRNA	0.0404618	0.557897	1.36353	up	0.012633	0.359886	0.069147	0.524565	0.565363	0.527234
ENST00000578963	ENSG00000105655	ISYNA1	1691	protein_coding	mRNA	0.0470366	0.594846	1.40894	up	3.22491	2.04124	3.90852	4.8304	4.14753	5.24316
ENST00000579066	ENSG00000178971	CTC1	514	retained_intron	lncRNA	0.0256735	0.440612	1.43895	up	0.274611	0.065187	0.048137	0.516175	0.552723	0.778756
ENST00000579329	ENSG00000136490	LIMD2	920	retained_intron	lncRNA	0.00370607	0.367318	1.33941	up	0.061135	0.12196	0.061084	0.369539	0.50293	0.464948
ENST00000579450	ENSG00000146872	TLK2	559	protein_coding	mRNA	0.0114852	0.367318	5.31883	up	0	0	0	4.20713	2.4295	7.42014
ENST00000579512	ENSG00000270276	HIST2H4B	1132	protein_coding	mRNA	0.0141986	0.367318	3.04706	up	3.86914	2.76998	0	7.25089	5.94532	6.23379
ENST00000579674	ENSG00000167543	TP53I13	2468	retained_intron	lncRNA	0.0355182	0.523887	1.29256	up	0.072755	0.236863	0.288072	0.587432	0.443116	0.633682
ENST00000580246	ENSG00000108854	SMURF2	623	retained_intron	lncRNA	0.011275	0.367318	1.25418	up	0.450796	0.364065	0.236421	0.666887	0.619766	0.754107
ENST00000580273	ENSG00000125454	SLC25A19	582	protein_coding	mRNA	0.0272906	0.454793	1.28941	up	0.118386	0.302848	0.155344	0.480223	0.46436	0.645151
ENST00000580385	ENSG00000265393	CTD-2517M22.17	338	antisense	lncRNA	0.0141203	0.367318	1.71391	up	0.981201	1.2915	1.65725	2.84368	2.59133	3.53729
ENST00000580870	ENSG00000079134	THOC1	552	retained_intron	lncRNA	0.021361	0.403004	1.36297	up	0.099121	0	0.364403	0.50256	0.778603	0.48576
ENST00000580896	ENSG00000108510	MED13	251	processed_transcript	lncRNA	0.0124527	0.367318	1.47573	up	0.257442	0.53351	0.359929	0.972353	0.964046	1.15487
ENST00000581229	ENSG00000173065	FAM222B	598	protein_coding	mRNA	0.0239102	0.423935	1.36643	up	0	0	0	0.497134	0.209706	0.409941
ENST00000581478	ENSG00000263639	MSMB	386	protein_coding	mRNA	0.0072535	0.367318	1.32526	up	1.86338	2.58995	0.151029	1.93799	1.70159	1.9239
ENST00000581584	ENSG00000169738	DCXR	766	protein_coding	mRNA	0.0257867	0.441647	1.79932	up	0.492762	0.147885	0.166002	1.56855	0.89598	1.36706
ENST00000581638	ENSG00000159314	ARHGAP27	537	retained_intron	lncRNA	0.0137684	0.367318	1.41099	up	0.146129	0	0.016398	0.371612	0.550711	0.530668
ENST00000581655	ENSG00000141551	CSNK1D	549	processed_transcript	lncRNA	0.00823338	0.367318	1.48992	up	0.307902	0.217086	0.819604	1.27733	0.937009	1.30929
ENST00000581707	ENSG00000072310	SREBF1	695	retained_intron	lncRNA	0.0062317	0.367318	1.26275	up	1.68081	1.89533	1.79696	2.57926	2.38931	2.59785
ENST00000581977	ENSG00000263528	IKBKE	3221	protein_coding	mRNA	0.00908508	0.367318	1.44309	up	3.4077	4.71129	1.56705	4.12179	5.12675	4.50975
ENST00000582114	ENSG00000108465	CDK5RAP3	647	retained_intron	lncRNA	0.0247137	0.43185	1.28955	up	0.308803	0.197898	0.726015	0.704054	1.0101	0.78735
ENST00000583758	ENSG00000185158	LRRC37B	731	retained_intron	lncRNA	0.000346883	0.150592	1.32213	up	0	0	0	0.345898	0.288956	0.332433
ENST00000584012	ENSG00000266236	NARF-IT1	769	sense_intronic	lncRNA	0.0236704	0.421713	1.29672	up	0.472738	0.700917	0.086893	0.627388	0.739486	0.963888
ENST00000584573	ENSG00000198909	MAP3K3	2480	protein_coding	mRNA	0.024135	0.425774	1.49001	up	0.43973	0.808585	0.702803	1.64158	1.45934	1.26389
ENST00000584586	ENST00000584586	CTD-2206N4.4-001	279	transcribed_processed_pseudogene	lncRNA	0.0460828	0.590276	1.32117	up	0.049039	0	0.094189	0.238454	0.584935	0.363369
ENST00000584804	ENSG00000108384	RAD51C	474	protein_coding	mRNA	0.0494672	0.610009	1.58939	up	3.23475	5.15343	2.76342	5.54889	5.5111	7.68626
ENST00000584901	ENSG00000161960	EIF4A1	1021	retained_intron	lncRNA	0.0407382	0.55994	1.76772	up	0.930284	0.720212	7.5886	6.14055	3.54285	5.26407
ENST00000585105	ENSG00000177728	TMEM94	5632	retained_intron	lncRNA	0.0468969	0.593806	1.21554	up	0.226459	0.294178	0.211076	0.559719	0.607309	0.366867
ENST00000585132	ENSG00000266412	NCOA4	3489	protein_coding	mRNA	0.0399933	0.554565	1.83977	up	0.011512	0.028547	0.618269	2.03973	1.0061	0.856751
ENST00000585153	ENSG00000008283	CYB561	811	protein_coding	mRNA	0.0260086	0.443798	1.3774	up	0.173063	0.104842	0.33161	0.466151	0.748842	0.804597
ENST00000585251	ENSG00000265128	RP11-15F12.3	502	antisense	lncRNA	0.0209824	0.398894	1.27007	up	0.114089	0	0.020864	0.40574	0.256881	0.316688
ENST00000585281	ENSG00000265190	ANXA8	1960	protein_coding	mRNA	0.0304907	0.484393	1.92926	up	0	0.464444	0	0.928539	0.925276	1.7122
ENST00000585441	ENSG00000188283	ZNF383	562	processed_transcript	lncRNA	0.0422317	0.568491	1.24328	up	0.064461	0	0.13948	0.304204	0.231503	0.476911
ENST00000585733	ENSG00000116017	ARID3A	581	retained_intron	lncRNA	0.010387	0.367318	1.5925	up	0.387853	0.549753	0.950356	1.88507	1.45014	1.50357
ENST00000585925	ENSG00000167604	NFKBID	1036	protein_coding	mRNA	0.0160065	0.367318	1.35222	up	0.149939	0.047918	0.085023	0.58178	0.509227	0.356405
ENST00000585940	ENSG00000267523	CTD-2537I9.12	545	antisense	lncRNA	0.00775658	0.367318	2.44909	up	0.415728	0	0	1.46814	1.91027	1.84154
ENST00000586201	ENSG00000033627	ATP6V0A1	881	protein_coding	mRNA	0.000588072	0.192521	1.59275	up	0.290272	0.323866	0	0.928321	0.901293	0.802395
ENST00000586300	ENSG00000108679	LGALS3BP	442	retained_intron	lncRNA	0.0140977	0.367318	1.68056	up	0.108365	0.084183	0.029127	0.596972	0.708026	1.12868
ENST00000586518	ENSG00000132475	H3F3B	1701	retained_intron	lncRNA	0.00663061	0.367318	1.51809	up	1.13875	0.965114	1.49385	2.15269	2.71331	2.2388
ENST00000586773	ENSG00000099622	CIRBP	942	protein_coding	mRNA	0.000180685	0.1089	1.6165	up	0.235865	0.278282	0.134871	0.994288	0.887915	0.97708
ENST00000586794	ENSG00000171346	KRT15	470	retained_intron	lncRNA	0.000404513	0.160179	1.2925	up	0	0	0	0.270826	0.28225	0.32479
ENST00000587575	ENSG00000266970	RP11-806H10.4	490	lincRNA	lncRNA	0.00166487	0.32287	1.39763	up	0.423117	0.5477	0.237332	0.83027	0.983873	0.98399
ENST00000587649	ENSG00000153443	UBALD1	707	protein_coding	mRNA	0.0465696	0.592606	1.32624	up	0.810878	1.09884	1.4474	1.94913	1.97205	1.55812
ENST00000587826	ENSG00000267201	AC005624.2	371	lincRNA	lncRNA	0.04559	0.587615	1.23032	up	0.149253	0.032473	0.041662	0.218517	0.330298	0.413109
ENST00000588289	ENSG00000099203	TMED1	541	protein_coding	mRNA	0.0124758	0.367318	1.2528	up	0	0.017767	0.122792	0.371515	0.229646	0.355244
ENST00000588465	ENSG00000129353	SLC44A2	1487	retained_intron	lncRNA	0.0390851	0.548125	1.6082	up	0.752598	0.362381	0.311696	1.04831	1.73032	1.28276
ENST00000588682	ENSG00000176170	SPHK1	858	protein_coding	mRNA	0.0154893	0.367318	1.32884	up	0	0	0	0.31727	0.225952	0.452746
ENST00000589237	ENSG00000131115	ZNF227	589	processed_transcript	lncRNA	0.0215902	0.405748	1.45893	up	0.319397	0.157907	0.413789	0.796573	1.17645	0.758721
ENST00000589359	ENSG00000197256	KANK2	3048	protein_coding	mRNA	0.0206296	0.394637	1.81607	up	2.1533	4.19832	0.929827	3.68148	4.72278	5.1753
ENST00000589421	ENSG00000119559	C19orf25	492	retained_intron	lncRNA	0.0278949	0.460444	1.36019	up	0.886644	0.625706	0.364271	1.04721	1.16582	1.29005
ENST00000589561	ENSG00000129353	SLC44A2	2577	retained_intron	lncRNA	0.0145087	0.367318	1.63292	up	0.564055	0.643689	0.674006	1.40174	2.12039	1.51158
ENST00000590083	ENSG00000099625	CBARP	4261	protein_coding	mRNA	0.000955687	0.243639	1.43616	up	1.79529	1.89702	1.84793	3.24997	3.07093	2.94654
ENST00000590320	ENSG00000267534	S1PR2	3582	protein_coding	mRNA	0.0265781	0.448532	1.77658	up	3.25223	3.25246	0.449148	3.22821	5.07508	3.80344
ENST00000590427	ENSG00000237732	AC010980.2	548	processed_transcript	lncRNA	0.0327196	0.502609	1.23679	up	0	0.123431	0.186323	0.406908	0.295149	0.404535
ENST00000590459	ENSG00000125753	VASP	405	retained_intron	lncRNA	0.0387083	0.54594	1.23786	up	0.105711	0.310452	0.017476	0.489478	0.374843	0.323444
ENST00000590514	ENSG00000092931	MFSD11	1891	protein_coding	mRNA	0.00429656	0.367318	1.68897	up	0	0	1.25808	1.40852	1.24093	1.29867
ENST00000591470	ENSG00000105607	GCDH	1867	protein_coding	mRNA	0.04172	0.566126	2.74981	up	0.089694	1.36517	0.973808	3.71498	4.69381	2.9814
ENST00000591504	ENSG00000166510	CCDC68	4132	protein_coding	mRNA	0.0274535	0.456349	1.45084	up	0.358493	0.762093	0.232496	1.01082	0.882241	1.27686
ENST00000591808	ENSG00000074657	ZNF532	5171	protein_coding	mRNA	0.0458515	0.589035	1.35431	up	0.035778	0.029314	0.405816	0.361748	0.69818	0.689629
ENST00000591863	ENSG00000121289	CEP89	2903	protein_coding	mRNA	0.00026686	0.127391	5.0501	up	0.161776	0.06261	0.661051	5.6217	6.3715	4.78862
ENST00000591912	ENSG00000130165	ELOF1	899	protein_coding	mRNA	0.0339742	0.511792	1.22622	up	0.211445	0.102356	0.104811	0.412106	0.300539	0.474787
ENST00000591982	ENSG00000141854	CTB-55O6.8	2187	retained_intron	lncRNA	0.00233832	0.362924	1.57414	up	3.42456	4.08331	2.64278	6.04866	5.82914	5.34056
ENST00000592055	ENSG00000079999	KEAP1	979	protein_coding	mRNA	0.0232339	0.418553	1.28173	up	0.171845	0.122022	0.039113	0.409891	0.535719	0.309548
ENST00000592147	ENSG00000064545	TMEM161A	347	processed_transcript	lncRNA	0.0384667	0.544267	1.42854	up	0.120247	0.00756	0.034115	0.437387	0.759481	0.343399
ENST00000592255	ENSG00000108679	LGALS3BP	556	retained_intron	lncRNA	0.000764383	0.222025	1.2139	up	0	0	0	0.18544	0.229416	0.22704
ENST00000592275	ENSG00000055483	USP36	594	protein_coding	mRNA	0.0184035	0.371099	1.22622	up	0.053337	0.227237	0.028262	0.327469	0.321718	0.368099
ENST00000592389	ENSG00000267344	CTB-39G8.3	457	antisense	lncRNA	0.0121592	0.367318	1.40218	up	0.415006	0.491123	0.186784	0.686459	0.941308	1.03562
ENST00000592465	ENSG00000267077	RP11-127I20.5	720	antisense	lncRNA	0.00694235	0.367318	1.2004	up	0.148946	0.124636	0.066522	0.281553	0.382959	0.331602
ENST00000592485	ENSG00000130811	EIF3G	893	retained_intron	lncRNA	0.0333722	0.507675	1.29697	up	0.431959	0.286708	0.140539	0.59405	0.56155	0.79593
ENST00000592717	ENSG00000108788	MLX	551	retained_intron	lncRNA	0.0218874	0.407004	1.34104	up	0.245561	0.320123	0.018386	0.435932	0.533689	0.762241
ENST00000592727	ENSG00000104904	OAZ1	726	retained_intron	lncRNA	0.0408802	0.560442	3.88302	up	5.89472	9.45816	14.2917	60.6571	49.3437	21.685
ENST00000592849	ENSG00000181038	METTL23	846	protein_coding	mRNA	0.024	0.42433	1.31515	up	0.371471	0.584604	0.247412	0.67272	0.797677	0.986099
ENST00000592974	ENSG00000068137	PLEKHH3	628	processed_transcript	lncRNA	0.000637736	0.201619	1.21928	up	0.088251	0.052443	0.229224	0.392503	0.344635	0.395131
ENST00000593588	ENSG00000269635	AC004257.1	277	lincRNA	lncRNA	0.00500589	0.367318	1.20702	up	0	0	0	0.156924	0.244303	0.221024
ENST00000593646	ENSG00000219200	RNASEK	566	protein_coding	mRNA	0.0034385	0.367318	4.77721	up	10.7778	19.5908	0	23.2979	18.9247	33.5181
ENST00000594114	ENSG00000268375	CTD-2568A17.8	260	antisense	lncRNA	0.00987299	0.367318	1.22841	up	0.107628	0.042772	0.097395	0.268438	0.345399	0.383129
ENST00000595132	ENSG00000105287	PRKD2	624	protein_coding	mRNA	0.00388191	0.367318	1.2299	up	0.007509	0.015829	0.00381	0.214128	0.295932	0.212695
ENST00000595683	ENSG00000221983	UBA52	779	protein_coding	mRNA	0.0106358	0.367318	2.0955	up	5.52869	4.57649	3.482	9.46051	12.553	9.13711
ENST00000596048	ENSG00000223802	CERS1	749	protein_coding	mRNA	0.0224139	0.410647	1.26254	up	0.301707	0.369742	0.635415	0.930881	0.69534	0.850347
ENST00000596125	ENSG00000130299	GTPBP3	644	retained_intron	lncRNA	0.0205087	0.393114	1.3258	up	0.044537	0.227897	0.099361	0.569772	0.409308	0.472018
ENST00000596332	ENSG00000105486	LIG1	584	retained_intron	lncRNA	0.0010116	0.249404	1.22896	up	0.330569	0.33892	0.172843	0.591096	0.551308	0.538988
ENST00000596439	ENSG00000231731	AC010976.2	1007	antisense	lncRNA	0.0387953	0.546683	1.21745	up	0.067687	0.112103	0.633247	0.488467	0.610315	0.555638
ENST00000596710	ENSG00000269845	RP11-420K14.6	2692	processed_transcript	lncRNA	0.0019858	0.339537	1.23479	up	0	0	0	0.27464	0.198556	0.232735
ENST00000596847	ENSG00000095059	DHPS	646	retained_intron	lncRNA	0.0228101	0.414483	1.4038	up	0	0	0.146165	0.563407	0.604177	0.29318
ENST00000597069	ENSG00000130749	ZC3H4	664	processed_transcript	lncRNA	0.0182986	0.369868	1.27668	up	1.18568	1.15516	1.2935	1.78446	1.64511	2.07997
ENST00000597145	ENSG00000142002	DPP9	4257	retained_intron	lncRNA	0.00697145	0.367318	1.31292	up	0.180192	0.146202	0.795462	0.896841	0.831805	0.69875
ENST00000597726	ENSG00000142002	DPP9	570	protein_coding	mRNA	0.0399858	0.554538	1.25204	up	0	0	0	0.341955	0.121556	0.304895
ENST00000598716	ENSG00000269096	CT45A3	855	protein_coding	mRNA	0.0124202	0.367318	1.27741	up	0.000558	0	0	0.192557	0.365608	0.27972
ENST00000598755	ENSG00000269388	AC018755.16	664	processed_transcript	lncRNA	0.00490684	0.367318	1.272	up	0.982582	1.15608	0.073174	0.933293	1.08981	1.09662
ENST00000599218	ENSG00000012211	PRICKLE3	2062	protein_coding	mRNA	0.00506775	0.367318	1.28472	up	7.37489	7.70278	7.00861	9.08978	9.92137	10.0978
ENST00000599369	ENSG00000099326	MZF1	2587	protein_coding	mRNA	0.0325453	0.501166	1.26708	up	0.356092	0.324968	0.642261	0.890472	0.655559	0.983363
ENST00000599612	ENSG00000254858	MPV17L2	1408	protein_coding	mRNA	0.00268015	0.367318	2.16785	up	2.36251	2.3268	6.6366	9.54243	7.99729	9.48647
ENST00000599652	ENSG00000161618	ALDH16A1	3995	retained_intron	lncRNA	0.0422359	0.568491	1.56848	up	0.953698	0.265908	1.43681	2.24437	2.05676	1.55135
ENST00000599814	ENSG00000125755	SYMPK	6537	protein_coding	mRNA	0.0306963	0.486367	1.33172	up	1.03093	1.28147	0.486782	1.27482	1.3688	1.83238
ENST00000599840	ENSG00000008382	MPND	1611	protein_coding	mRNA	0.00947094	0.367318	1.41429	up	4.79395	4.45783	5.82225	6.81682	7.81439	8.14433
ENST00000600499	ENSG00000090006	LTBP4	580	retained_intron	lncRNA	0.0254405	0.437989	1.64246	up	0.141567	0.331838	0.214215	0.790829	1.42312	0.869769
ENST00000600639	ENSG00000095059	DHPS	285	protein_coding	mRNA	0.00572976	0.367318	1.25197	up	0.097993	0.125108	0.267662	0.42212	0.446803	0.523908
ENST00000600737	ENSG00000032444	PNPLA6	4195	protein_coding	mRNA	0.0450409	0.584196	2.52522	up	7.74114	4.89392	0.262648	6.79339	9.37247	8.8961
ENST00000600816	ENSG00000161558	TMEM143	810	retained_intron	lncRNA	0.00642014	0.367318	1.26481	up	0.158011	0.350111	0	0.410504	0.474296	0.460527
ENST00000600988	ENSG00000167595	PROSER3	2697	retained_intron	lncRNA	0.0434746	0.575721	1.26785	up	0.560345	0.745586	0.939834	1.11401	1.41836	1.15347
ENST00000600997	ENSG00000006015	C19orf60	2275	retained_intron	lncRNA	0.0443907	0.580539	1.29034	up	0.664621	0.286896	0.903254	1.10321	1.23187	0.961575
ENST00000601452	ENSG00000141968	VAV1	815	retained_intron	lncRNA	0.00604688	0.367318	2.04882	up	0	0.03433	0.062087	1.07131	0.841953	1.4902
ENST00000601492	ENSG00000105372	RPS19	342	protein_coding	mRNA	0.0007535	0.220206	1.45794	up	1.3397	1.31289	0.771202	2.01653	2.03944	2.1014
ENST00000601501	ENSG00000104960	PTOV1	564	retained_intron	lncRNA	0.0489873	0.606982	1.47053	up	0.723443	1.26457	0.291909	1.0303	1.58603	1.82356
ENST00000601675	ENSG00000104960	PTOV1	1587	protein_coding	mRNA	0.0185091	0.372419	1.31983	up	6.15129	6.37819	5.00481	7.70336	7.24869	8.82827
ENST00000602029	ENSG00000105053	VRK3	578	retained_intron	lncRNA	0.020112	0.38827	1.36298	up	0.130593	0.394568	0.22972	0.668371	0.678987	0.735616
ENST00000602040	ENSG00000104960	PTOV1	597	retained_intron	lncRNA	0.0178	0.367318	1.22704	up	0.182806	0.241415	0.237947	0.414793	0.591038	0.494056
ENST00000602122	ENSG00000105699	LSR	2480	protein_coding	mRNA	0.0446293	0.581974	2.03189	up	1.63078	4.31871	1.84939	5.63272	5.45564	6.32054
ENST00000602125	ENSG00000167747	C19orf48	292	processed_transcript	lncRNA	0.00777047	0.367318	1.28921	up	0.033997	0.075183	0.205923	0.460287	0.483902	0.353427
ENST00000602287	ENSG00000156398	SFXN2	584	retained_intron	lncRNA	0.0392002	0.549096	1.53772	up	0.361297	0.47671	0.13709	0.913647	0.706881	1.44835
ENST00000602475	ENSG00000170035	UBE2E3	602	protein_coding	mRNA	0.0439802	0.578453	1.22207	up	0	0	0.143504	0.223615	0.42225	0.224816
ENST00000602661	ENSG00000106692	FKTN	2576	protein_coding	mRNA	0.00894879	0.367318	1.55021	up	2.18847	1.75902	1.33208	3.34192	3.03018	3.22139
ENST00000602735	ENSG00000142089	IFITM3	713	protein_coding	mRNA	0.00192823	0.336794	3.73051	up	0.129214	0.000398	0.467792	3.61656	2.67917	4.35768
ENST00000602924	ENSG00000159753	RLTPR	521	retained_intron	lncRNA	0.010129	0.367318	2.28836	up	0.207026	0	0	1.1993	2.01133	1.16131
ENST00000602945	ENSG00000102977	ACD	805	retained_intron	lncRNA	0.043174	0.573865	1.24152	up	0.242977	0.136451	0.002911	0.269154	0.456781	0.429363
ENST00000603680	ENSG00000139629	GALNT6	2206	retained_intron	lncRNA	0.0365219	0.530495	1.55961	up	1.28651	1.27189	1.04489	1.75713	2.66189	2.91428
ENST00000604992	ENSG00000270194	RP11-259K5.2	2389	antisense	lncRNA	0.021957	0.407577	1.94347	up	0	0	0	1.52568	0.734879	0.679852
ENST00000606142	ENSG00000002549	LAP3	1876	protein_coding	mRNA	0.0392664	0.549638	2.38982	up	14.7927	5.665	15.5907	30.6205	26.2242	29.702
ENST00000607212	ENSG00000064601	CTSA	590	retained_intron	lncRNA	0.0067775	0.367318	1.4602	up	0.121427	0.168317	0.349171	0.686979	0.932693	0.730216
ENST00000607496	ENSG00000271851	RP11-565F19.2	2374	sense_intronic	lncRNA	0.000722912	0.216392	1.46906	up	0	0	0	0.444082	0.427675	0.537448
ENST00000607916	ENSG00000124493	GRM4	1004	retained_intron	lncRNA	0.00489364	0.367318	1.31812	up	0.122751	0.046152	0	0.397371	0.423993	0.337413
ENST00000607946	ENSG00000273466	RP11-548H3.1	759	antisense	lncRNA	0.0187112	0.374632	2.03106	up	0	0	0.736042	1.08863	1.41711	2.14194
ENST00000608135	ENSG00000272721	RP11-778D9.12	362	antisense	lncRNA	0.00930193	0.367318	1.32703	up	0.563363	0.382825	0.348402	0.877362	0.888427	0.901689
ENST00000608721	ENSG00000272841	RP3-428L16.2	2025	antisense	lncRNA	0.0436459	0.576714	1.45817	up	0.322597	0	0	0.716178	0.516046	0.554989
ENST00000609045	ENSG00000130699	TAF4	562	processed_transcript	lncRNA	0.00220238	0.355994	1.22227	up	0.80451	0.859999	0.58089	1.0453	1.11267	1.18696
ENST00000609470	ENSG00000234684	SDCBP2-AS1	2158	antisense	lncRNA	0.0102683	0.367318	2.09031	up	0.299666	0	0	1.1062	1.62519	1.11701
ENST00000610533	ENSG00000106628	POLD2	1619	protein_coding	mRNA	0.0265111	0.448532	1.82243	up	31.6555	29.0369	6.19581	29.351	33.1811	31.5669
ENST00000610809	ENSG00000276850	CH17-360D5.2	1962	lincRNA	lncRNA	0.0197004	0.38412	1.30802	up	0.251165	0.256951	0.235664	0.527159	0.574672	0.802534
ENST00000610893	ENSG00000090006	LTBP4	578	retained_intron	lncRNA	0.0036834	0.367318	1.45587	up	0.055638	0.188199	0.084731	0.55526	0.685327	0.587521
ENST00000611294	ENSG00000102984	ZNF821	1833	protein_coding	mRNA	0.00195155	0.338033	1.62023	up	0.987228	1.17511	0.912857	2.27305	2.05919	2.45622
ENST00000612090	ENSG00000103966	EHD4	1985	protein_coding	mRNA	0.0356431	0.525115	1.26377	up	3.33183	2.92372	3.1357	4.3381	4.60167	3.76258
ENST00000612778	ENSG00000185499	MUC1	1836	protein_coding	mRNA	0.0148844	0.367318	1.7004	up	8.19682	9.26258	8.56227	15.5975	17.8976	13.0691
ENST00000612899	ENSG00000118503	TNFAIP3	4735	protein_coding	mRNA	0.0455336	0.587091	1.45234	up	0.749688	1.22792	1.2673	1.69887	2.26906	2.112
ENST00000612989	ENSG00000186417	GLDN	1676	protein_coding	mRNA	0.0285382	0.467392	1.68961	up	0.293955	0	0	1.06284	0.892894	0.579676
ENST00000613750	ENSG00000188566	NDOR1	1151	retained_intron	lncRNA	0.048333	0.603227	1.47729	up	0.540625	0.38595	0.275159	0.983618	0.765205	1.45911
ENST00000613943	ENSG00000108604	SMARCD2	2342	protein_coding	mRNA	0.0410123	0.561367	2.08207	up	0.879786	2.11629	0.150993	2.45817	4.13169	1.99606
ENST00000613988	ENSG00000172785	CBWD1	1381	retained_intron	lncRNA	0.0385304	0.544493	1.46538	up	0	0.209314	0	0.404048	0.454343	0.822915
ENST00000614097	ENSG00000274290	HIST1H2BE	497	protein_coding	mRNA	0.0211914	0.401024	6.84298	up	1.45657	2.55349	105.5	94.8231	59.7179	89.2764
ENST00000614438	ENSG00000278540	ACACA	569	protein_coding	mRNA	0.00189913	0.335131	2.17082	up	0.132218	0	0.905675	1.65072	2.23043	1.83886
ENST00000614576	ENSG00000276867	CTD-2358C21.5	533	lincRNA	lncRNA	5.92201e-05	0.0865336	1.51136	up	0.457679	0.571988	0	0.896987	0.981299	0.964107
ENST00000614750	ENSG00000143862	ARL8A	1727	protein_coding	mRNA	0.0374775	0.537404	1.47514	up	0.539452	0.423154	0.452755	1.45078	1.29642	0.816591
ENST00000614790	ENSG00000273559	CWC25	3234	protein_coding	mRNA	0.0342271	0.513342	1.26961	up	1.68766	1.19684	2.13949	2.67861	2.17195	2.41062
ENST00000614867	ENSG00000172270	BSG	960	protein_coding	mRNA	0.0363388	0.52964	1.97066	up	0.571028	0.717374	2.42288	2.56051	4.6033	2.96902
ENST00000615032	ENSG00000161847	RAVER1	1952	protein_coding	mRNA	0.0028727	0.367318	3.90496	up	1.91068	0.195475	10.193	14.0313	13.0407	14.0513
ENST00000615637	ENSG00000251493	FOXD1	2107	protein_coding	mRNA	0.000195883	0.111236	4.11416	up	0	0	0	2.72296	3.49452	3.15756
ENST00000616432	ENSG00000185340	GAS2L1	2925	protein_coding	mRNA	0.0092346	0.367318	2.27141	up	1.58927	2.6244	0.670275	5.64032	4.09924	3.88195
ENST00000616448	ENSG00000227345	PARG	3197	protein_coding	mRNA	0.0262168	0.445876	1.23008	up	5.5234	6.22412	6.30001	7.25672	7.58645	8.0893
ENST00000616552	ENSG00000112118	MCM3	3208	protein_coding	mRNA	0.0231911	0.4185	2.05609	up	8.8631	10.9458	0.858161	9.92279	13.1888	8.19208
ENST00000616661	ENSG00000162496	DHRS3	1722	protein_coding	mRNA	0.0494995	0.610189	1.5594	up	1.82713	2.01806	2.08845	3.09218	4.88137	3.17648
ENST00000616768	ENSG00000076242	MLH1	721	protein_coding	mRNA	0.00672387	0.367318	1.44946	up	0.554725	0.301567	0.760641	1.1184	1.30571	1.30944
ENST00000617275	ENSG00000169499	PLEKHA2	5582	protein_coding	mRNA	0.019975	0.387092	1.7879	up	1.68962	1.40411	0.789818	2.45524	2.7715	3.80533
ENST00000617753	ENSG00000090006	LTBP4	580	retained_intron	lncRNA	0.0132397	0.367318	1.34143	up	0.402098	0.28879	0.320718	0.713312	0.94505	0.727349
ENST00000617913	ENSG00000273136	NBPF26	2931	protein_coding	mRNA	0.034786	0.517708	1.73412	up	1.13495	0.737719	1.91494	3.10508	2.09991	3.76689
ENST00000618200	ENSG00000165949	IFI27	364	protein_coding	mRNA	0.00958446	0.367318	7.08513	up	0	0	0	2.99698	8.43381	8.37663
ENST00000618693	ENSG00000125821	DTD1	695	protein_coding	mRNA	0.0267679	0.450327	1.29685	up	0	0	0.11123	0.216478	0.449254	0.396766
ENST00000618863	ENSG00000165949	IFI27	505	protein_coding	mRNA	0.00468287	0.367318	2.65427	up	0	0	0.114284	1.52504	2.4429	1.43702
ENST00000619149	ENSG00000068400	GRIPAP1	2828	retained_intron	lncRNA	0.0249236	0.433584	1.27371	up	1.88215	1.67299	0.943367	1.94613	2.10424	2.19988
ENST00000619341	ENSG00000108010	GLRX3	496	processed_transcript	lncRNA	0.0285361	0.467392	1.31745	up	0.067814	0.182461	0.474221	0.581692	0.760254	0.591664
ENST00000619469	ENSG00000100918	REC8	2720	retained_intron	lncRNA	0.0378246	0.539927	1.46298	up	0.090269	0	0	0.780093	0.324135	0.444466
ENST00000619572	ENSG00000047346	FAM214A	3548	protein_coding	mRNA	0.021889	0.407004	1.47628	up	3.65705	2.17797	5.53564	6.51879	5.82821	5.68092
ENST00000619747	ENSG00000104341	LAPTM4B	2758	protein_coding	mRNA	0.000182472	0.1089	4.13869	up	11.5964	18.5748	0.434139	21.377	25.9182	26.9174
ENST00000620030	ENSG00000186298	PPP1CC	582	non_stop_decay	mRNA	0.0223961	0.410647	1.33622	up	1.01641	1.28151	0.975571	1.79258	2.00875	1.53791
ENST00000620123	ENSG00000204267	TAP2	5679	protein_coding	mRNA	0.00107884	0.259571	2.54093	up	1.30747	1.44496	1.03146	4.9836	4.01061	5.1076
ENST00000620396	ENSG00000165949	IFI27	599	protein_coding	mRNA	0.0415112	0.564317	1.35779	up	0	0	0	0.196012	0.560097	0.3399
ENST00000620438	ENSG00000196890	HIST3H2BB	2364	protein_coding	mRNA	0.0362935	0.529608	2.79832	up	12.5439	13.1106	0	17.116	9.94876	12.8589
ENST00000621160	ENSG00000165949	IFI27	644	protein_coding	mRNA	0.00110543	0.263102	9.20843	up	0	0	0.532827	7.19532	10.7451	12.2787
ENST00000621439	ENSG00000141337	ARSG	2599	protein_coding	mRNA	0.00242821	0.367318	3.48774	up	0.541506	0.46739	0.781288	3.75101	5.92073	4.34174
ENST00000621654	ENSG00000273604	C17orf96	3719	protein_coding	mRNA	0.0138206	0.367318	2.30034	up	4.2639	3.8503	0	5.29542	5.08149	5.27176
ENST00000622125	ENSG00000198736	MSRB1	1366	protein_coding	mRNA	0.00481968	0.367318	1.63516	up	4.4766	4.69963	3.85956	7.29545	7.05779	8.6849
ENST00000622257	ENSG00000211450	C11orf31	1294	protein_coding	mRNA	0.000341713	0.15053	8.42856	up	0	0	0	7.27915	6.16578	9.0891
ENST00000622327	ENSG00000108384	RAD51C	686	protein_coding	mRNA	0.0309628	0.488217	1.29745	up	3.27978	3.40847	3.02493	4.57709	3.90516	4.98436
ENST00000623550	ENSG00000166710	B2M	2329	retained_intron	lncRNA	0.0253965	0.437655	1.63172	up	0.187566	0.188563	0.219609	1.12913	0.599336	1.20707
ENST00000623998	ENSG00000280433	CH507-9B2.9	3634	protein_coding	mRNA	0.0232177	0.418553	2.18995	up	0.377117	0.547699	1.96016	4.33117	3.27793	2.25252
ENST00000624681	ENSG00000279482	RP11-401L13.7	714	TEC	lncRNA	0.016838	0.367318	1.33556	up	0	0	0	0.335445	0.22134	0.460464
ENST00000624748	ENSG00000280071	CH507-9B2.3	684	processed_transcript	lncRNA	0.0436905	0.576986	1.32621	up	2.15036	1.88258	0.995292	2.65219	2.13472	2.46631
ENST00000625349	ENSG00000108848	LUC7L3	408	protein_coding	mRNA	0.0466546	0.592769	1.2204	up	0.555414	0.657863	0.296093	0.882365	0.627819	0.912506
ENST00000626579	ENSG00000281635	AC022819.2	81	protein_coding	mRNA	0.0314968	0.492277	1.3019	up	0.114661	0.203779	0.058924	0.312636	0.457915	0.609403
ENST00000626782	ENSG00000173575	CHD2	2131	protein_coding	mRNA	0.0400436	0.554942	1.47324	up	0.050491	0	0	0.44308	0.79018	0.296723
ENST00000626909	ENSG00000129682	FGF13	1039	protein_coding	mRNA	0.0125931	0.367318	1.32089	up	0	0	0.494553	0.495776	0.494193	0.643365
ENST00000628622	ENSG00000280587	LINC01348	3262	lincRNA	lncRNA	0.0180469	0.368116	1.25038	up	0.442581	0.462193	0.51889	0.713604	0.962467	0.873746
ENST00000629438	ENSG00000114956	DGUOK	1029	protein_coding	mRNA	0.0454316	0.586469	1.31458	up	5.7775	7.85587	5.35935	8.41595	7.84485	9.00635
ENST00000630659	ENSG00000174483	BBS1	1934	protein_coding	mRNA	0.0310604	0.489112	1.25451	up	0.56227	0.58826	0.23938	0.928613	0.645073	0.841618
ENST00000630925	ENSG00000137575	SDCBP	2076	protein_coding	mRNA	0.0192741	0.380391	2.49841	up	2.47371	2.90278	0.881104	7.8624	6.81447	4.1503
ENST00000631086	ENSG00000020577	SAMD4A	6677	protein_coding	mRNA	0.0249654	0.433784	1.22218	up	0.00525	0.014581	0.147252	0.371898	0.197643	0.327386
ENST00000631268	ENSG00000235085	AC091153.4	207	antisense	lncRNA	0.0194538	0.381874	1.50958	up	0	0.231361	0	0.671308	0.726761	0.435334
ENST00000631802	ENSG00000254893	AC113404.1	1917	protein_coding	mRNA	0.00427779	0.367318	1.34357	up	8.71253	8.11743	9.14448	11.9937	11.3871	12.7258
ENST00000632009	ENSG00000132793	LPIN3	4132	protein_coding	mRNA	0.00646021	0.367318	1.33017	up	2.75539	2.64763	2.78246	3.98978	3.65958	4.26769
ENST00000634568	ENSG00000282851	BISPR	603	lincRNA	lncRNA	0.00902164	0.367318	1.28346	up	0.12075	0.076843	0	0.281642	0.371954	0.430106
ENST00000634910	ENSG00000274290	HIST1H2BE	2585	protein_coding	mRNA	0.0314113	0.491767	3.12512	up	0.331906	0.293414	11.9112	6.31524	12.7807	8.70513
ENST00000635339	ENSG00000282851	BISPR	493	lincRNA	lncRNA	0.0243639	0.428299	1.30215	up	0	0.047169	0.074335	0.330261	0.495976	0.256133
ENST00000025399	ENSG00000023734	STRAP	1442	protein_coding	mRNA	0.0259882	0.443514	0.736645	down	0.791205	0.638873	0.024119	0.063631	0.026169	0.016558
ENST00000198939	ENSG00000085872	CHERP	4084	protein_coding	mRNA	8.80538e-06	0.0363814	0.520206	down	9.55172	12.2187	3.58956	3.21131	3.25729	3.28863
ENST00000202834	ENSG00000089063	TMEM230	1472	protein_coding	mRNA	0.00501023	0.367318	0.58868	down	3.37229	2.63006	15.5143	3.03458	3.34292	2.85667
ENST00000206451	ENSG00000092010	PSME1	1006	protein_coding	mRNA	0.0236292	0.421713	0.28794	down	68.7176	63.6986	66.236	28.3992	11.3377	19.09
ENST00000216068	ENSG00000100246	DNAL4	1504	protein_coding	mRNA	0.00246208	0.367318	0.419465	down	4.32803	3.99684	4.20024	1.05267	1.52811	0.974356
ENST00000216416	ENSG00000100528	CNIH1	4793	protein_coding	mRNA	0.0014753	0.306893	0.737942	down	4.99204	4.44138	8.2961	4.26139	4.19585	3.83424
ENST00000221249	ENSG00000032444	PNPLA6	4617	protein_coding	mRNA	0.0298461	0.478801	0.418781	down	1.16873	1.74843	7.95192	1.16291	0.411667	0.574658
ENST00000222214	ENSG00000105607	GCDH	1956	protein_coding	mRNA	0.0310808	0.489315	0.528819	down	6.02724	3.82593	4.30539	1.6336	1.83992	2.53877
ENST00000222250	ENSG00000105643	ARRDC2	2503	protein_coding	mRNA	0.0139601	0.367318	0.528179	down	1.03754	1.17743	1.75701	0.06341	0.192366	0.478942
ENST00000222690	ENSG00000105968	H2AFV	3804	protein_coding	mRNA	0.00490784	0.367318	0.637741	down	10.9318	12.9417	10.8657	7.24341	6.42714	7.21555
ENST00000225504	ENSG00000213246	SUPT4H1	1489	protein_coding	mRNA	0.000264481	0.127391	0.38263	down	26.089	22.0737	27.9369	8.78429	9.43292	9.20645
ENST00000228136	ENSG00000110696	C11orf58	2049	protein_coding	mRNA	0.00629496	0.367318	0.67815	down	8.76328	6.57427	23.8467	7.34376	7.71139	8.41498
ENST00000229769	ENSG00000112039	FANCE	2554	protein_coding	mRNA	0.00236295	0.364857	0.793014	down	4.70407	4.40671	4.43298	3.47681	3.32805	3.30531
ENST00000229812	ENSG00000112079	STK38	3576	protein_coding	mRNA	0.00621788	0.367318	0.559564	down	16.209	16.9906	15.6499	9.57804	7.37248	9.10309
ENST00000233143	ENSG00000034510	TMSB10	496	protein_coding	mRNA	0.0079393	0.367318	0.322317	down	456.803	430.128	517.287	112.194	187.006	163.795
ENST00000233813	ENSG00000115461	IGFBP5	6215	protein_coding	mRNA	0.0316293	0.493659	0.209413	down	12.6515	12.426	11.7798	2.69347	0.374948	3.20893
ENST00000234111	ENSG00000115758	ODC1	2653	protein_coding	mRNA	0.0481789	0.602089	0.823502	down	17.6857	19.6365	17.3676	13.6665	14.44	16.2161
ENST00000234677	ENSG00000031698	SARS	1852	protein_coding	mRNA	0.000390735	0.158942	0.792473	down	52.6501	51.5406	64.5318	44.3168	45.0821	44.5635
ENST00000237305	ENSG00000118515	SGK1	2401	protein_coding	mRNA	0.0362339	0.529057	0.733505	down	2.01856	2.10197	1.09346	0.760516	0.836833	1.2463
ENST00000237654	ENSG00000118816	CCNI	2772	protein_coding	mRNA	0.00511539	0.367318	0.810915	down	39.7089	39.627	48.276	33.2792	35.4611	34.8494
ENST00000242872	ENSG00000123219	CENPK	1576	protein_coding	mRNA	0.0171876	0.367318	0.655077	down	3.37577	4.00792	1.6836	1.1546	1.43254	1.86842
ENST00000243253	ENSG00000058262	SEC61A1	3635	protein_coding	mRNA	0.0249852	0.433784	0.749026	down	77.0769	75.8752	36.9666	44.2554	41.5171	43.409
ENST00000243389	ENSG00000123643	SLC36A1	5781	protein_coding	mRNA	0.0168948	0.367318	0.609462	down	2.40042	3.42731	3.46971	1.37982	1.49805	1.59971
ENST00000244426	ENSG00000112146	FBXO9	4559	protein_coding	mRNA	0.0344972	0.515394	0.642074	down	1.36165	2.13191	0.021217	0.107827	0.036284	0.474057
ENST00000244533	ENSG00000124574	ABCC10	5088	protein_coding	mRNA	0.0397442	0.553013	0.608727	down	1.64485	2.70904	1.44574	0.439883	1.01842	0.768492
ENST00000244670	ENSG00000124702	KLHDC3	1903	protein_coding	mRNA	0.0410326	0.561367	0.615557	down	0.63132	2.04532	0	0	0	0
ENST00000245932	ENSG00000125753	VASP	2305	protein_coding	mRNA	0.0217234	0.406215	0.774623	down	35.4937	31.5892	32.458	23.6002	26.808	25.9759
ENST00000247178	ENSG00000126775	ATG14	4742	protein_coding	mRNA	0.0483541	0.603331	0.590893	down	1.80408	2.11817	3.8755	0.674392	1.46112	1.30019
ENST00000249066	ENSG00000128335	APOL2	2685	protein_coding	mRNA	0.0178515	0.367318	0.805925	down	0	0	0.746526	0	0	0
ENST00000249647	ENSG00000092531	SNAP23	2687	protein_coding	mRNA	0.0328618	0.503517	0.564879	down	8.78692	6.47549	5.66287	2.74476	3.36634	4.19423
ENST00000251507	ENSG00000152061	RABGAP1L	2899	protein_coding	mRNA	0.0115443	0.367318	0.816363	down	4.51959	4.34616	3.87822	3.21155	3.47834	3.08482
ENST00000252322	ENSG00000130038	CRACR2A	2186	protein_coding	mRNA	0.00262666	0.367318	0.285022	down	3.0063	1.52852	3.74758	0.205335	0	0
ENST00000252512	ENSG00000130227	XPO7	4861	protein_coding	mRNA	0.0245359	0.43022	0.826462	down	25.1983	26.5992	19.5434	20.3309	17.8579	18.9441
ENST00000257497	ENSG00000135046	ANXA1	1509	protein_coding	mRNA	0.0137186	0.367318	0.784756	down	0.765603	0.60857	0.977763	0.444031	0.307906	0.47916
ENST00000257766	ENSG00000135315	CEP162	5063	protein_coding	mRNA	0.015184	0.367318	0.802857	down	0.006428	0.000336	0.761878	0.005146	0	0
ENST00000259523	ENSG00000136997	MYC	2042	protein_coding	mRNA	0.0278547	0.45997	0.65623	down	1.19362	0.989016	1.39047	0.546744	0.614916	0.210402
ENST00000260356	ENSG00000137801	THBS1	7775	protein_coding	mRNA	0.0220071	0.407868	0.76361	down	204.019	208.7	228.2	172.057	172.745	147.284
ENST00000261168	ENSG00000171681	ATF7IP	8878	protein_coding	mRNA	0.0217405	0.406215	0.651852	down	7.8078	9.45086	5.08197	4.59304	3.46653	4.74259
ENST00000261206	ENSG00000111058	ACSS3	2666	protein_coding	mRNA	0.0434943	0.575919	0.780816	down	0	0	1.06693	0	0.105467	0
ENST00000261388	ENSG00000011638	TMEM159	1812	protein_coding	mRNA	0.0375448	0.537946	0.759179	down	7.33828	7.26125	12.5649	5.87966	7.1798	6.8566
ENST00000261464	ENSG00000082512	TRAF5	3972	protein_coding	mRNA	0.0294962	0.47517	0.822327	down	2.12334	1.47414	2.9512	1.59379	1.63521	1.64632
ENST00000261721	ENSG00000064726	BTBD1	3297	protein_coding	mRNA	0.0011282	0.265061	0.607168	down	23.8102	24.1898	24.1234	15.291	13.7639	13.6276
ENST00000261755	ENSG00000103876	FAH	1471	protein_coding	mRNA	0.0431812	0.573865	0.615449	down	0	0.045657	3.48046	0.25395	0.104488	0
ENST00000262710	ENSG00000100813	ACIN1	4935	protein_coding	mRNA	0.0046726	0.367318	0.560088	down	4.4339	5.50969	1.87619	1.33906	1.88353	1.34407
ENST00000262746	ENSG00000117450	PRDX1	1234	protein_coding	mRNA	0.0137478	0.367318	0.295621	down	4.24064	1.58836	79.9765	2.18835	1.89649	4.14861
ENST00000262861	ENSG00000116991	SIPA1L2	6555	protein_coding	mRNA	0.0178515	0.367318	0.525884	down	0	0	4.26431	0	0	0
ENST00000263309	ENSG00000074201	CLNS1A	1172	protein_coding	mRNA	7.37707e-06	0.034348	0.414273	down	1.0977	0.77272	2.43059	0	0	0
ENST00000264025	ENSG00000110400	PVRL1	5840	protein_coding	mRNA	2.64495e-05	0.0688952	0.336225	down	22.7998	22.3067	23.4027	6.85989	7.37433	6.86465
ENST00000264059	ENSG00000115468	EFHD1	2259	protein_coding	mRNA	0.0258225	0.44209	0.824144	down	22.8586	23.5544	27.8984	19.5729	21.8444	19.7226
ENST00000264093	ENSG00000114956	DGUOK	1144	protein_coding	mRNA	0.0180494	0.368116	0.589698	down	5.47189	3.70164	4.94842	2.67679	2.30531	2.12376
ENST00000264400	ENSG00000138670	RASGEF1B	2277	protein_coding	mRNA	0.0457257	0.588137	0.686486	down	0.582679	0	0.999624	0.048092	0.012761	0.053452
ENST00000265112	ENSG00000113407	TARS	4314	protein_coding	mRNA	0.0296358	0.476652	0.812546	down	23.5853	22.6677	32.0474	23.1939	20.9707	19.4573
ENST00000265260	ENSG00000081154	PCNP	2342	protein_coding	mRNA	0.0162413	0.367318	0.699393	down	9.22571	9.13019	20.0193	8.90399	7.61488	8.81732
ENST00000265843	ENSG00000110723	EXPH5	10187	protein_coding	mRNA	0.0426285	0.570509	0.796684	down	2.04095	2.33003	1.95105	1.36968	1.73804	1.29405
ENST00000267229	ENSG00000139746	RBM26	3624	protein_coding	mRNA	0.00593281	0.367318	0.727138	down	3.24939	2.36909	5.04851	2.34425	2.17443	2.40521
ENST00000267569	ENSG00000140044	JDP2	1700	protein_coding	mRNA	0.0144968	0.367318	0.740452	down	0.819608	0.462628	1.14636	0.422436	0.34476	0.27599
ENST00000268389	ENSG00000140749	IGSF6	2785	protein_coding	mRNA	0.0259505	0.443185	0.804222	down	1.11133	1.16324	0.832419	0.752667	0.507633	0.60734
ENST00000269932	ENSG00000105676	ARMC6	2412	protein_coding	mRNA	0.01995	0.387005	0.553021	down	4.00395	2.26972	5.57663	2.1053	1.71945	1.36326
ENST00000271153	ENSG00000142973	CYP4B1	2171	protein_coding	mRNA	0.00643418	0.367318	0.785895	down	0.305388	0.143171	0.352789	0	0	0
ENST00000273261	ENSG00000144749	LRIG1	5273	protein_coding	mRNA	0.0319988	0.496739	0.757071	down	7.93623	6.91395	7.16919	5.89915	5.29889	4.76815
ENST00000274008	ENSG00000145375	SPATA5	8137	protein_coding	mRNA	0.0209421	0.398553	0.736086	down	3.1149	3.55326	2.55375	1.93671	2.26251	1.6773
ENST00000276682	ENSG00000147677	EIF3H	2041	protein_coding	mRNA	0.00991256	0.367318	0.193954	down	1.83127	1.71107	61.9613	0.575999	1.18492	0.692139
ENST00000277141	ENSG00000083223	ZCCHC6	5724	protein_coding	mRNA	0.0327229	0.502609	0.612152	down	2.75526	3.65963	2.04526	0.822689	1.62875	1.40352
ENST00000278426	ENSG00000149150	SLC43A1	2598	protein_coding	mRNA	0.0149731	0.367318	0.768467	down	3.58557	2.78578	4.15939	2.40171	2.43432	2.62032
ENST00000280333	ENSG00000150760	DOCK1	6797	protein_coding	mRNA	0.0407498	0.55994	0.60876	down	11.1782	9.5111	8.43932	6.37014	5.9848	4.1737
ENST00000280780	ENSG00000189319	FAM53B	1568	protein_coding	mRNA	0.0152626	0.367318	0.511886	down	0.286985	0.580867	2.23516	0	0	0.001001
ENST00000281701	ENSG00000143748	NVL	3123	protein_coding	mRNA	0.00900568	0.367318	0.568315	down	4.97333	4.69363	3.87637	2.13622	2.50254	1.69725
ENST00000283179	ENSG00000153187	HNRNPU	3704	protein_coding	mRNA	0.00575689	0.367318	0.63897	down	44.0128	42.6251	32.7125	26.0466	22.3551	25.2035
ENST00000283243	ENSG00000153246	PLA2R1	8526	protein_coding	mRNA	0.00675926	0.367318	0.593091	down	0.509324	0.925272	0.667357	0	0	0
ENST00000285379	ENSG00000104267	CA2	1717	protein_coding	mRNA	0.00950498	0.367318	0.668882	down	15.066	16.417	13.1027	10.6117	9.25872	8.63309
ENST00000285908	ENSG00000145919	BOD1	1286	protein_coding	mRNA	0.0307208	0.486536	0.647545	down	0.319425	0.743679	0.842826	0.060023	0	0.111329
ENST00000286234	ENSG00000155792	DEPTOR	2569	protein_coding	mRNA	0.00295613	0.367318	0.693308	down	5.29116	4.92122	5.13451	2.99399	3.42745	3.31525
ENST00000286827	ENSG00000156299	TIAM1	7200	protein_coding	mRNA	0.00612917	0.367318	0.770817	down	6.74529	7.53773	6.63581	4.8909	5.38294	5.06859
ENST00000287008	ENSG00000156453	PCDH1	4793	protein_coding	mRNA	0.0245033	0.429866	0.627451	down	3.68652	5.44104	4.20659	2.37342	2.12812	2.61318
ENST00000288520	ENSG00000148219	ASTN2	2356	protein_coding	mRNA	0.0250126	0.433784	0.709792	down	0.646298	0.337396	0.409712	0	0.107257	0
ENST00000289893	ENSG00000127603	MACF1	19141	protein_coding	mRNA	0.0487342	0.605488	0.453501	down	0	0.108081	8.35791	0.021536	0.000661	0.338951
ENST00000291525	ENSG00000160180	TFF3	408	protein_coding	mRNA	0.00167067	0.32287	0.475462	down	2.08723	2.16438	2.59795	0.763375	0.464652	0.496975
ENST00000291691	ENSG00000160298	C21orf58	2975	protein_coding	mRNA	0.0196553	0.383879	0.495222	down	1.02632	0.85795	9.82367	1.29719	0.850346	0.542346
ENST00000291825	ENSG00000105227	PRX	5502	protein_coding	mRNA	0.0253848	0.437579	0.756456	down	0.992397	0.690116	1.03912	0.536635	0.488893	0.328672
ENST00000292314	ENSG00000160799	CCDC12	1017	protein_coding	mRNA	6.89611e-05	0.0895009	0.129315	down	5.31371	5.96758	8.88722	0	0	0
ENST00000293677	ENSG00000161847	RAVER1	3595	protein_coding	mRNA	0.00349831	0.367318	0.455156	down	4.67457	5.84041	0.686336	0.895583	0.589819	0.652552
ENST00000293842	ENSG00000161970	RPL26	524	protein_coding	mRNA	0.0024997	0.367318	0.79305	down	207.578	198.047	205.831	160.068	167.125	157.751
ENST00000295958	ENSG00000163683	SMIM14	6483	protein_coding	mRNA	0.00202636	0.341009	0.782925	down	25.1741	23.8599	23.7926	19.2188	18.7048	18.3779
ENST00000296411	ENSG00000164024	METAP1	2791	protein_coding	mRNA	0.0318545	0.495753	0.756075	down	11.4138	11.8316	22.8045	11.9895	11.3748	10.2876
ENST00000297323	ENSG00000164742	ADCY1	12503	protein_coding	mRNA	0.00498579	0.367318	0.704733	down	3.69338	3.59726	4.19792	2.49799	2.16009	2.61876
ENST00000297438	ENSG00000164823	OSGIN2	4209	protein_coding	mRNA	0.0225956	0.4124	0.419195	down	10.3723	10.3123	1.25806	2.08382	1.08961	1.56684
ENST00000299798	ENSG00000135740	SLC9A5	3736	protein_coding	mRNA	0.0229476	0.415911	0.83238	down	0.194085	0.067654	0.435374	0	0.100195	0
ENST00000300131	ENSG00000166886	NAB2	2711	protein_coding	mRNA	0.0227562	0.413693	0.718334	down	19.8034	21.7133	21.4075	13.2137	14.7917	16.5046
ENST00000301183	ENSG00000105341	ATP5SL	1134	protein_coding	mRNA	0.0168949	0.367318	0.751328	down	0.43109	0.235616	0.575974	0	0.145899	0.063916
ENST00000301821	ENSG00000168028	RPSA	1171	protein_coding	mRNA	0.021459	0.403898	0.772553	down	221.561	239.191	247.076	169.988	181.257	196.847
ENST00000302392	ENSG00000169964	TMEM42	1026	protein_coding	mRNA	0.0278395	0.459783	0.625415	down	1.82739	2.18113	2.04906	1.25828	0.818907	0.635038
ENST00000302424	ENSG00000171206	TRIM8	2831	protein_coding	mRNA	0.0114857	0.367318	0.653721	down	6.01561	5.50959	17.8892	5.21053	5.76871	5.77418
ENST00000302472	ENSG00000171522	PTGER4	3848	protein_coding	mRNA	0.0393734	0.550122	0.558821	down	2.20192	2.16133	2.19983	1.27221	0.382874	0.805482
ENST00000302937	ENSG00000170892	TSEN34	2294	protein_coding	mRNA	0.0486906	0.605136	0.413552	down	12.4379	24.7927	10.9253	5.80262	3.60451	7.5244
ENST00000303077	ENSG00000170577	SIX2	2205	protein_coding	mRNA	0.0446849	0.582163	0.784882	down	1.29553	1.67238	1.62084	1.14396	0.9663	0.854078
ENST00000303596	ENSG00000168286	THAP11	2114	protein_coding	mRNA	0.00426381	0.367318	0.142357	down	22.5957	23.5258	0	0	0	0
ENST00000303910	ENSG00000277075	HIST1H2AE	509	protein_coding	mRNA	0.0443717	0.580366	0.82599	down	185.355	161.081	159.697	141.777	140.852	132.952
ENST00000304058	ENSG00000169570	DTWD2	4365	protein_coding	mRNA	0.0194469	0.381848	0.749717	down	0.007046	0.012045	1.13647	0.012015	0.014058	0.008509
ENST00000305123	ENSG00000169047	IRS1	9705	protein_coding	mRNA	0.0450301	0.584196	0.703183	down	6.47214	6.46304	5.71087	4.54595	4.48747	3.20768
ENST00000306156	ENSG00000171132	PRKCE	5650	protein_coding	mRNA	0.0144455	0.367318	0.808827	down	4.41452	4.39737	4.58899	3.75763	3.32556	3.22576
ENST00000307355	ENSG00000197008	ZNF138	1141	protein_coding	mRNA	0.0414753	0.564213	0.747856	down	0.378677	0.101632	1.19395	0.293337	0.191714	0
ENST00000308406	ENSG00000166484	MAPK7	3149	protein_coding	mRNA	0.0033428	0.367318	0.648896	down	1.41816	1.36117	3.05422	0.834313	0.877813	0.999698
ENST00000309134	ENSG00000175348	TMEM9B	1659	protein_coding	mRNA	0.00992789	0.367318	0.437243	down	1.2986	0.418645	5.99125	0.296554	0.647348	0.124977
ENST00000309263	ENSG00000175356	SCUBE2	3727	protein_coding	mRNA	0.0288124	0.46982	0.321647	down	9.46384	7.68243	10.4184	4.37765	1.76411	1.41644
ENST00000309683	ENSG00000173041	ZNF680	3022	protein_coding	mRNA	0.0369191	0.533806	0.778376	down	3.71568	3.38161	1.96961	2.13646	2.03405	1.84713
ENST00000309777	ENSG00000160055	TMEM234	1082	protein_coding	mRNA	0.0137669	0.367318	0.703461	down	0.962668	1.06169	0.987637	0.292652	0.568534	0.375087
ENST00000310847	ENSG00000088448	ANKRD10	1193	protein_coding	mRNA	0.0145035	0.367318	0.706127	down	1.79643	1.65226	2.04648	0.849423	0.955601	1.24106
ENST00000311111	ENSG00000172809	RPL38	1170	protein_coding	mRNA	0.0354908	0.523643	0.825675	down	33.7624	34.6745	38.3397	27.4884	28.8588	31.8158
ENST00000311317	ENSG00000136051	KIAA1033	2897	retained_intron	lncRNA	0.0353028	0.522026	0.579887	down	1.44114	2.32195	0.50801	0.29519	0.57931	0.043265
ENST00000311521	ENSG00000155368	DBI	714	protein_coding	mRNA	0.01781	0.367318	0.666893	down	0.746273	1.56613	0	0	0.164276	0
ENST00000312358	ENSG00000072195	SPEG	10782	protein_coding	mRNA	0.0181239	0.368443	0.789876	down	0.760281	0.690887	0.503611	0.254132	0.394891	0.234329
ENST00000314117	ENSG00000181826	RELL1	1326	protein_coding	mRNA	0.0116325	0.367318	0.82268	down	0.259842	0.133458	0.31552	0.066037	0	0
ENST00000314957	ENSG00000177738	CTD-2201E18.3	2388	sense_overlapping	lncRNA	0.00783573	0.367318	0.746724	down	1.75806	1.68238	2.16406	1.21585	0.990608	1.26641
ENST00000316423	ENSG00000109814	UGDH	3216	protein_coding	mRNA	0.0482804	0.602788	0.77233	down	49.0404	64.5454	48.0995	39.4252	39.7783	42.5427
ENST00000316707	ENSG00000163629	PTPN13	7546	protein_coding	mRNA	0.00377296	0.367318	0.615098	down	0.543086	0.135496	1.23411	0	0	0
ENST00000317538	ENSG00000163867	ZMYM6	2702	protein_coding	mRNA	0.0394125	0.550333	0.805364	down	0.156809	0.302765	0.574327	0.058865	0.105482	0.097831
ENST00000317827	ENSG00000147526	TACC1	7802	protein_coding	mRNA	0.0211555	0.400619	0.75227	down	2.24021	2.48935	2.26096	1.25713	1.55997	1.69423
ENST00000317881	ENSG00000005022	SLC25A5	1274	protein_coding	mRNA	0.034404	0.514835	0.816077	down	174.907	176.066	253.424	179.477	154.846	161.51
ENST00000318978	ENSG00000178531	CTXN1	1274	protein_coding	mRNA	0.00635976	0.367318	0.295909	down	18.9641	19.0935	2.38565	2.00896	1.52972	2.47287
ENST00000319033	ENSG00000119523	ALG2	1627	protein_coding	mRNA	0.042169	0.568229	0.722941	down	1.09302	0.717905	0.313453	0.16165	0.186043	0.227686
ENST00000319545	ENSG00000037757	MRI1	3027	protein_coding	mRNA	0.0297044	0.477382	0.746738	down	0.459839	0.989272	0	0.100524	0	0
ENST00000319788	ENSG00000167397	VKORC1	1077	protein_coding	mRNA	0.023645	0.421713	0.493796	down	3.34912	2.12127	8.88211	1.32227	1.36534	2.47417
ENST00000320248	ENSG00000176595	KBTBD11	6710	protein_coding	mRNA	0.00556981	0.367318	0.514626	down	1.25758	1.29431	1.28246	0.261085	0.278813	0
ENST00000320954	ENSG00000170275	CRTAP	6630	protein_coding	mRNA	0.0416688	0.565751	0.501786	down	9.28204	18.2998	10.2351	6.19681	5.25408	4.93064
ENST00000321016	ENSG00000080854	IGSF9B	4050	protein_coding	mRNA	0.00240384	0.367212	0.417903	down	1.83752	1.21684	1.20876	0	0.00078	0
ENST00000321531	ENSG00000143450	OAZ3	852	protein_coding	mRNA	0.044881	0.583523	0.720354	down	0.60601	0.185779	0.390552	0	0	0
ENST00000321892	ENSG00000171634	BPTF	11292	protein_coding	mRNA	0.0416381	0.565526	0.657431	down	9.26727	9.14251	8.76866	5.40013	7.02494	4.58995
ENST00000322142	ENSG00000115641	FHL2	1462	protein_coding	mRNA	0.0230417	0.41667	0.746724	down	0.273571	0.543206	0.342271	0.085211	0	0
ENST00000322507	ENSG00000111799	COL12A1	11723	protein_coding	mRNA	0.0167316	0.367318	0.638499	down	2.22884	2.70924	2.38287	1.42054	1.26254	0.913003
ENST00000322995	ENSG00000196998	WDR45	1444	protein_coding	mRNA	0.0133252	0.367318	0.770248	down	0.25991	0.194964	0.575214	0	0	0.129378
ENST00000323482	ENSG00000154930	ACSS1	3680	protein_coding	mRNA	0.0139635	0.367318	0.722923	down	1.88112	1.30893	1.99367	0.935231	1.00876	0.994972
ENST00000323702	ENSG00000010626	LRRC23	1208	protein_coding	mRNA	0.00339903	0.367318	0.692212	down	0.407526	0.663483	0.324443	0	0	0
ENST00000323833	ENSG00000123297	TSFM	1218	protein_coding	mRNA	0.00401934	0.367318	0.467664	down	0.4443	0.498275	3.05313	0.023131	0.030917	5.7e-05
ENST00000324862	ENSG00000117360	PRPF3	2433	protein_coding	mRNA	0.0338188	0.510339	0.829478	down	32.315	32.3865	34.7964	30.0119	26.6189	25.8561
ENST00000324873	ENSG00000176046	NUPR1	5491	protein_coding	mRNA	0.00203451	0.3419	0.821537	down	0.337885	0.247939	0.362983	0.075705	0.089317	0.088232
ENST00000325971	ENSG00000101639	CEP192	7764	protein_coding	mRNA	0.00639072	0.367318	0.632444	down	2.11545	1.96345	1.3978	0.735057	0.619402	0.921076
ENST00000326197	ENSG00000010803	SCMH1	3275	protein_coding	mRNA	0.00956789	0.367318	0.7822	down	0.444427	0.341173	1.65027	0.444633	0.316876	0.436073
ENST00000326654	ENSG00000113719	ERGIC1	3952	protein_coding	mRNA	0.00111694	0.264253	0.783611	down	2.46117	2.35755	2.2371	1.64354	1.5599	1.65526
ENST00000326799	ENSG00000136758	YME1L1	3994	protein_coding	mRNA	0.0485261	0.604009	0.420035	down	0	0	14.5318	0	0.343293	0.329172
ENST00000327086	ENSG00000185495	RP11-504P24.3	343	transcribed_unprocessed_pseudogene	lncRNA	0.0209507	0.398652	0.747318	down	0.203129	0	1.08395	0	0.166033	0
ENST00000327535	ENSG00000185436	IFNLR1	4549	protein_coding	mRNA	0.0210267	0.399147	0.780678	down	0.686015	0.819686	0.600729	0.340963	0.211847	0.414155
ENST00000327619	ENSG00000064655	EYA2	2702	protein_coding	mRNA	0.0264675	0.448363	0.634946	down	1.58575	1.35345	1.66325	0.946296	0.521651	0.424954
ENST00000327761	ENSG00000068028	RASSF1	1757	protein_coding	mRNA	0.0343828	0.514647	0.720742	down	4.43761	5.65904	5.74885	3.61298	3.79707	3.18756
ENST00000327835	ENSG00000164684	ZNF704	14386	protein_coding	mRNA	0.0476401	0.598913	0.815477	down	1.33093	1.06959	0.985407	0.73518	0.828842	0.616243
ENST00000328041	ENSG00000185052	SLC24A3	3929	protein_coding	mRNA	0.0132512	0.367318	0.687579	down	6.14348	5.98897	6.38249	4.59568	3.66181	3.63437
ENST00000328392	ENSG00000113558	SKP1	572	protein_coding	mRNA	0.0324988	0.500837	0.262679	down	1.41358	6.61925	2.24597	0	0	0
ENST00000329146	ENSG00000182809	CRIP2	1857	protein_coding	mRNA	0.042681	0.570509	0.64936	down	8.62168	9.87572	16.8678	6.18319	8.32529	7.31847
ENST00000329542	ENSG00000113763	UNC5A	3812	protein_coding	mRNA	0.0408787	0.560442	0.809887	down	2.28646	2.83816	2.60068	1.74699	2.02686	1.89343
ENST00000329797	ENSG00000183484	GPR132	3660	protein_coding	mRNA	0.0178991	0.367348	0.729683	down	0.931201	1.32147	0.99427	0.512765	0.588691	0.423855
ENST00000330374	ENSG00000160131	VMA21	4717	protein_coding	mRNA	1.01848e-05	0.0406779	0.11619	down	21.3052	23.4847	20.7905	1.52138	1.72318	1.67963
ENST00000330689	ENSG00000196981	WDR5B	3720	protein_coding	mRNA	0.0178515	0.367318	0.556555	down	0	0	3.54691	0	0	0
ENST00000332050	ENSG00000182944	EWSR1	2552	protein_coding	mRNA	0.035863	0.526541	0.728502	down	0.720167	0.612441	0.265521	0.235434	0.033742	0.019994
ENST00000332246	ENSG00000147408	CSGALNACT1	3872	protein_coding	mRNA	0.000571526	0.191004	0.572937	down	0.827281	0.660734	0.856193	0.0001	0.066131	0.006377
ENST00000333891	ENSG00000186472	PCLO	20329	protein_coding	mRNA	0.0178515	0.367318	0.807357	down	0	0	0.738533	0	0	0
ENST00000333926	ENSG00000122873	CISD1	2479	protein_coding	mRNA	0.0337736	0.51009	0.801929	down	3.76355	3.79971	1.43131	1.99518	1.83238	2.03069
ENST00000334463	ENSG00000186871	ERCC6L	4243	protein_coding	mRNA	0.0151698	0.367318	0.58054	down	0.166889	0	4.76002	0.159779	0.136609	0.311113
ENST00000334528	ENSG00000248905	FMN1	12355	protein_coding	mRNA	0.0307752	0.486762	0.775455	down	4.99226	5.96328	5.9164	4.40014	4.19092	3.83496
ENST00000334690	ENSG00000168538	TRAPPC11	4552	protein_coding	mRNA	0.044457	0.580709	0.806667	down	2.2993	2.40119	2.6132	1.97482	1.49836	1.89784
ENST00000335647	ENSG00000186625	KATNA1	1684	protein_coding	mRNA	0.0152442	0.367318	0.696939	down	0.40296	0.888315	0.184061	0	0.000107	0
ENST00000335793	ENSG00000179604	CDC42EP4	3272	protein_coding	mRNA	0.0392218	0.549328	0.380044	down	1.10465	1.90572	11.4947	0.443647	0.815312	1.05272
ENST00000336078	ENSG00000074657	ZNF532	6696	protein_coding	mRNA	0.0403026	0.55692	0.772085	down	0.610551	0.415457	0.012473	0	0	0
ENST00000336095	ENSG00000101236	RNF24	7453	protein_coding	mRNA	0.00614878	0.367318	0.790321	down	0.424468	0.262439	0.545207	0.138289	0.142949	0.082703
ENST00000336097	ENSG00000239672	NME1	986	protein_coding	mRNA	0.0382114	0.542732	0.729325	down	50.4687	41.8591	47.7717	36.2987	29.9277	35.6209
ENST00000336230	ENSG00000116221	MRPL37	1179	protein_coding	mRNA	0.040735	0.55994	0.346642	down	2.59561	0.134295	3.92891	0	0	0
ENST00000336452	ENSG00000132507	EIF5A	1256	protein_coding	mRNA	0.0329512	0.504048	0.186671	down	15.2711	14.8254	20.1293	0.552246	3.62277	4.11832
ENST00000336783	ENSG00000168488	ATXN2L	4367	protein_coding	mRNA	0.00863293	0.367318	0.324044	down	30.505	32.9524	6.33675	6.41419	4.60659	4.05232
ENST00000337221	ENSG00000168077	SCARA3	1910	protein_coding	mRNA	0.00888535	0.367318	0.748985	down	0.578248	0.202107	1.79987	0.311112	0.407073	0.366425
ENST00000337841	ENSG00000090054	SPTLC1	946	protein_coding	mRNA	0.00616769	0.367318	0.655449	down	2.3692	2.16879	2.6816	1.4962	1.09937	1.15922
ENST00000338446	ENSG00000158234	FAIM	1622	protein_coding	mRNA	0.0382268	0.542757	0.624295	down	1.05625	0.435096	0.420756	0	0	0
ENST00000338631	ENSG00000100813	ACIN1	2445	protein_coding	mRNA	0.0108273	0.367318	0.541864	down	2.2808	1.28293	7.68182	1.02719	1.62883	1.35923
ENST00000338702	ENSG00000189221	MAOA	4015	protein_coding	mRNA	0.0239929	0.424266	0.671603	down	1.17707	1.74273	1.52591	0.533569	0.658958	0.791643
ENST00000338983	ENSG00000091436	AC013461.1	7179	protein_coding	mRNA	0.041407	0.563986	0.649121	down	3.02583	3.74585	9.16698	3.12165	2.67634	2.99844
ENST00000339276	ENSG00000175793	SFN	1320	protein_coding	mRNA	0.0392971	0.549875	0.25672	down	4.79558	2.89525	5.44984	0	1.61078	0
ENST00000339626	ENST00000339626	RLIMP1-001	1680	processed_pseudogene	lncRNA	0.0251283	0.434532	0.768703	down	0.880628	0.954439	0.534383	0.374374	0.468749	0.223351
ENST00000340004	ENSG00000115325	DOK1	1722	protein_coding	mRNA	0.0209074	0.398271	0.776639	down	0.074122	0.167348	0.609911	0	0	0
ENST00000340062	ENSG00000127952	STYXL1	953	protein_coding	mRNA	0.038896	0.546688	0.791982	down	0.754023	0.94689	0.284643	0.225908	0.172863	0.424513
ENST00000340099	ENSG00000125170	DOK4	2772	protein_coding	mRNA	0.00853551	0.367318	0.670331	down	2.10251	1.98352	4.5796	1.39005	1.6949	1.66363
ENST00000340107	ENSG00000068078	FGFR3	4293	protein_coding	mRNA	0.00244167	0.367318	0.747677	down	5.31186	5.18362	4.06509	3.4014	3.18855	3.33688
ENST00000340353	ENSG00000166575	TMEM135	3938	protein_coding	mRNA	0.0247305	0.431946	0.587073	down	1.66429	1.35549	2.70932	0.524568	1.11959	0.556568
ENST00000340360	ENSG00000166435	XRRA1	5681	protein_coding	mRNA	0.00510518	0.367318	0.80901	down	0.383844	0.60026	0.013051	0.058257	0.045384	0.005287
ENST00000340913	ENSG00000135486	HNRNPA1	1842	protein_coding	mRNA	0.00187993	0.333658	0.531272	down	14.3309	9.68529	35.0747	8.68669	9.22431	9.67717
ENST00000341491	ENSG00000162772	ATF3	2033	protein_coding	mRNA	0.0225653	0.412035	0.590967	down	1.0607	0.848484	0.817658	0.014407	0.020049	0.368042
ENST00000341700	ENSG00000156049	GNA14	2482	protein_coding	mRNA	0.0109641	0.367318	0.637994	down	1.73297	1.96965	2.26365	0.716725	0.942798	1.10032
ENST00000342101	ENSG00000159110	IFNAR2	2606	protein_coding	mRNA	0.046074	0.590276	0.702701	down	0.365095	0.621997	0.617061	0.254676	0	0
ENST00000342454	ENSG00000092036	HAUS4	1474	protein_coding	mRNA	0.0180622	0.368188	0.786282	down	0.444495	0.426671	1.08156	0.233662	0.386863	0.293622
ENST00000343949	ENSG00000197054	ZNF763	2621	protein_coding	mRNA	0.0325699	0.501166	0.764625	down	0.324128	0.831553	0	0	0	0
ENST00000344113	ENSG00000054654	SYNE2	21777	protein_coding	mRNA	0.0437444	0.577305	0.831623	down	12.2957	14.0086	11.3153	10.5576	10.5882	9.291
ENST00000344135	ENSG00000038382	TRIO	4065	protein_coding	mRNA	0.000168256	0.106026	0.754315	down	0.12533	0	0.881599	0	0	0
ENST00000344359	ENSG00000080839	RBL1	3225	protein_coding	mRNA	0.0425306	0.570279	0.700306	down	1.16835	1.2755	0.578101	0.403702	0.561379	0.15381
ENST00000344749	ENSG00000071564	TCF3	4289	protein_coding	mRNA	0.0342873	0.513862	0.612036	down	6.40721	8.05462	7.04128	4.16999	4.77133	3.10981
ENST00000345865	ENSG00000125351	UPF3B	2335	protein_coding	mRNA	0.0117927	0.367318	0.750892	down	4.17291	4.52281	3.87293	2.69705	3.22426	2.70969
ENST00000347077	ENSG00000187187	ZNF546	7987	protein_coding	mRNA	0.00327317	0.367318	0.733946	down	0.682565	0.818882	0	0	0.005087	0.097342
ENST00000348208	ENSG00000119139	TJP2	4058	protein_coding	mRNA	0.0185973	0.373318	0.526309	down	1.05299	0.542577	1.81292	0.413181	0	0
ENST00000348222	ENSG00000114956	DGUOK	880	protein_coding	mRNA	0.00731032	0.367318	0.644446	down	3.99576	5.27135	3.68908	2.32124	2.23112	2.53674
ENST00000350459	ENSG00000160746	ANO10	2039	protein_coding	mRNA	0.0370527	0.534834	0.465139	down	1.43793	0.063752	2.74123	0	0	0.145225
ENST00000351030	ENSG00000136811	ODF2	3899	protein_coding	mRNA	0.0143775	0.367318	0.699846	down	16.5207	17.9009	13.2485	11.7175	10.6853	9.45112
ENST00000351797	ENSG00000055147	FAM114A2	4443	protein_coding	mRNA	0.0398588	0.553751	0.821453	down	0.50177	0.492925	0.587646	0.33299	0.141461	0.309934
ENST00000353265	ENSG00000178184	PARD6G	3868	protein_coding	mRNA	0.0353466	0.522242	0.599083	down	2.37522	1.22111	2.22641	0.955122	0.591186	0.739621
ENST00000353656	ENSG00000056998	GYG2	1293	protein_coding	mRNA	0.015402	0.367318	0.795519	down	0.335639	0.268182	0.30682	0	0.116472	0
ENST00000353739	ENSG00000137075	RNF38	4945	protein_coding	mRNA	0.0195433	0.382779	0.748211	down	0.504104	0.608742	0.219174	0	0	0.185033
ENST00000354071	ENSG00000012048	BRCA1	4497	protein_coding	mRNA	0.0190772	0.378575	0.774763	down	0.397869	0.131565	0.536166	0.035971	0.057434	0.071725
ENST00000354234	ENSG00000136169	SETDB2	6139	protein_coding	mRNA	0.000449312	0.17087	0.731804	down	0.489376	0.492784	0.210308	0.016899	0.00103	0.001853
ENST00000354359	ENSG00000087460	GNAS	1975	protein_coding	mRNA	0.0165721	0.367318	0.695544	down	45.398	41.3893	37.7395	29.2281	30.5283	25.4039
ENST00000354546	ENSG00000197043	ANXA6	2593	protein_coding	mRNA	0.03026	0.48212	0.656623	down	33.8157	29.5018	32.2314	24.2363	20.3728	17.6855
ENST00000354724	ENSG00000164683	HEY1	2293	protein_coding	mRNA	0.0396804	0.552464	0.691634	down	0.449272	0.433782	1.12509	0.377	0.131754	0
ENST00000354772	ENSG00000092096	SLC22A17	2409	protein_coding	mRNA	0.047224	0.595808	0.581606	down	5.22394	3.01225	5.38491	1.72349	2.7437	2.23672
ENST00000354895	ENSG00000167397	VKORC1	901	protein_coding	mRNA	0.0182789	0.369773	0.435239	down	0.812855	0	8.28311	0.769304	0.092705	0
ENST00000355057	ENSG00000197238	HIST1H4J	373	protein_coding	mRNA	0.031363	0.491507	0.765633	down	608.791	524.041	665.237	429.195	450.166	507.207
ENST00000355260	ENSG00000110713	NUP98	5628	protein_coding	mRNA	0.0299761	0.479858	0.356062	down	3.6269	0.70731	6.00442	0.64924	0.451498	0.246391
ENST00000355422	ENSG00000151892	GFRA1	2583	protein_coding	mRNA	0.0154285	0.367318	0.525976	down	23.4831	23.6204	19.4446	12.4679	12.3734	8.67881
ENST00000356311	ENSG00000165698	C9orf9	2243	protein_coding	mRNA	0.000350362	0.151554	0.806124	down	0.391605	0.470434	0	0	0	0.010281
ENST00000356341	ENSG00000149269	PAK1	3737	protein_coding	mRNA	0.0129151	0.367318	0.691358	down	5.43443	4.7316	4.41616	3.07205	3.30657	2.70873
ENST00000356438	ENSG00000198331	HYLS1	1810	protein_coding	mRNA	0.0302099	0.481744	0.462103	down	1.63104	4.84047	0.563098	0.117577	0.252592	0.424587
ENST00000356725	ENSG00000197863	ZNF790	3037	protein_coding	mRNA	0.0119479	0.367318	0.796574	down	0.233975	0.003458	0.547589	0.0278	0	0
ENST00000356950	ENSG00000197903	HIST1H2BK	381	protein_coding	mRNA	0.0470222	0.594827	0.401531	down	1.94891	0	3.36655	0	0	0
ENST00000357006	ENSG00000198081	ZBTB14	3528	protein_coding	mRNA	0.049743	0.611429	0.818138	down	0.240398	0.62494	0	0.032354	0	0.002774
ENST00000357123	ENSG00000187778	MCRS1	1428	protein_coding	mRNA	0.0367718	0.532512	0.765336	down	0.617998	0.57931	0.20837	0.211212	0	0.094393
ENST00000357517	ENSG00000156453	PCDH1	3307	processed_transcript	lncRNA	0.018932	0.377005	0.803717	down	0	0.004641	0.752818	0	0	6.3e-05
ENST00000357649	ENSG00000178209	PLEC	14689	protein_coding	mRNA	0.0437703	0.577467	0.571245	down	1.71099	1.09378	0.837141	0.476176	0.012416	0.259191
ENST00000357865	ENSG00000117632	STMN1	1137	protein_coding	mRNA	0.00702922	0.367318	0.315397	down	5.29467	6.96303	0.626152	0.214385	0.650044	0.000314
ENST00000358147	ENSG00000196151	WDSUB1	1535	protein_coding	mRNA	0.0462469	0.591043	0.754009	down	0.299235	0.151867	0.845194	0.271249	0	0
ENST00000358321	ENSG00000099994	SUSD2	3404	protein_coding	mRNA	0.0143626	0.367318	0.702689	down	6.53015	6.47295	6.98545	3.91302	5.01325	4.32712
ENST00000358495	ENSG00000002016	RAD52	2710	protein_coding	mRNA	0.0443667	0.580366	0.637671	down	0.467532	0.698837	1.24097	0.398413	0	0.093354
ENST00000359326	ENSG00000000460	C1orf112	4002	protein_coding	mRNA	0.0178515	0.367318	0.727916	down	0	0	1.27218	0	0	0
ENST00000359341	ENST00000359341	ANKRD20A18P-001	492	unprocessed_pseudogene	lncRNA	0.0202311	0.3896	0.80583	down	0.610331	0.825718	0.364359	0.169876	0.334831	0.289837
ENST00000359543	ENSG00000213853	EMP2	5197	protein_coding	mRNA	0.0490373	0.607167	0.795545	down	92.3901	88.8394	106.515	70.0706	85.9938	74.4015
ENST00000359617	ENSG00000124222	STX16	4273	protein_coding	mRNA	0.0251004	0.434442	0.734073	down	0.40328	0.122387	1.07238	0.154751	0.220548	0
ENST00000359782	ENSG00000124523	SIRT5	1528	protein_coding	mRNA	0.0178515	0.367318	0.792011	down	0	0	0.826933	0	0	0
ENST00000359793	ENSG00000183137	CEP57L1	2515	protein_coding	mRNA	0.0178515	0.367318	0.825267	down	0	0	0.642692	0	0	0
ENST00000359893	ENSG00000082153	BZW1	779	protein_coding	mRNA	0.0267746	0.450327	0.679322	down	0.628512	1.18573	0.665309	0.187364	0.16437	0.30559
ENST00000360019	ENSG00000188603	CLN3	1913	protein_coding	mRNA	0.0241668	0.425973	0.799105	down	23.6191	21.2547	25.6139	18.9368	19.9988	17.202
ENST00000360204	ENSG00000160229	ZNF66	1120	protein_coding	mRNA	0.0105981	0.367318	0.691849	down	2.27775	2.14968	2.05106	1.35632	1.23339	0.96973
ENST00000360591	ENSG00000127952	STYXL1	1127	protein_coding	mRNA	0.0235702	0.421546	0.815811	down	0.269503	0.457027	0.281652	0.114415	0.038975	0.096963
ENST00000360822	ENSG00000136861	CDK5RAP2	5551	protein_coding	mRNA	0.0448171	0.582996	0.666071	down	0.899554	0.561813	0.721188	0.361295	0	0.116651
ENST00000361389	ENSG00000100577	GSTZ1	1010	protein_coding	mRNA	0.0139708	0.367318	0.498531	down	0.922932	0	3.03144	0.163778	0	0
ENST00000361485	ENSG00000110801	PSMD9	2087	retained_intron	lncRNA	0.0203612	0.391037	0.812867	down	0.578695	0.62098	0.167855	0.170477	0.211437	0.0756
ENST00000361539	ENSG00000198797	BRINP2	3558	protein_coding	mRNA	0.0135789	0.367318	0.724754	down	3.36646	4.09462	2.97539	2.28048	1.94338	2.3774
ENST00000361745	ENSG00000178028	DMAP1	1545	protein_coding	mRNA	0.00723617	0.367318	0.72403	down	0.235303	0.387089	0.508165	0	0	0
ENST00000361897	ENSG00000198929	NOS1AP	4931	protein_coding	mRNA	0.0335654	0.508777	0.790549	down	2.21372	2.76427	2.30906	1.77077	1.51148	1.80701
ENST00000364587	ENSG00000201457	SNORA55	135	snoRNA	ncRNA	0.0156858	0.367318	0.68503	down	0.495952	0.203649	0.896275	0	0.167316	0
ENST00000364722	ENSG00000201592	snoU2_19	80	snoRNA	ncRNA	0.0223374	0.410209	0.390227	down	2.26927	0.714168	4.1162	0.64543	0	0.19787
ENST00000366285	ENSG00000171792	RHNO1	517	protein_coding	mRNA	0.000327068	0.147328	0.758789	down	0.463659	0.390864	1.02465	0.259989	0.215712	0.245664
ENST00000366442	ENSG00000160691	SHC1	780	protein_coding	mRNA	0.0072477	0.367318	0.61288	down	2.05651	1.29492	10.2042	1.63776	1.85573	2.05204
ENST00000366813	ENSG00000163041	H3F3A	1308	protein_coding	mRNA	0.0442088	0.579621	0.535523	down	2.42444	2.48955	2.70453	1.58594	0.786251	0.492393
ENST00000367012	ENSG00000082497	SERTAD4	5219	protein_coding	mRNA	0.0232215	0.418553	0.792598	down	4.17323	4.60192	3.57106	3.27694	3.06514	2.68929
ENST00000367254	ENSG00000159346	ADIPOR1	1116	protein_coding	mRNA	0.000778303	0.223636	0.494655	down	0.55533	0	3.29743	0	0	0
ENST00000367362	ENSG00000116833	NR5A2	5086	protein_coding	mRNA	0.00957634	0.367318	0.662657	down	1.11213	1.33664	1.13902	0.606896	0.344312	0.410657
ENST00000367467	ENSG00000111961	SASH1	7711	protein_coding	mRNA	0.0148677	0.367318	0.74381	down	3.78113	3.43026	3.4017	2.26047	2.67418	2.18623
ENST00000367634	ENSG00000116191	RALGPS2	7512	protein_coding	mRNA	0.0357629	0.525588	0.69835	down	1.15141	1.73754	0.996338	0.715399	0.618331	0.389368
ENST00000368320	ENSG00000132680	KIAA0907	4499	protein_coding	mRNA	0.00474802	0.367318	0.650625	down	4.0694	4.15103	3.9136	1.97107	2.49617	2.37571
ENST00000368413	ENSG00000143537	ADAM15	1901	protein_coding	mRNA	0.0347981	0.517754	0.57185	down	1.001	0.963774	2.4118	0.104699	0.637324	0.50975
ENST00000368456	ENSG00000163348	PYGO2	1306	protein_coding	mRNA	0.0349982	0.519639	0.608285	down	0.043964	0	3.41908	0.028191	0.247711	0.025001
ENST00000368478	ENSG00000111877	MCM9	469	processed_transcript	lncRNA	0.000365914	0.153964	0.666823	down	1.17756	1.72322	0	0.150946	0.1188	0.175592
ENST00000368606	ENSG00000188820	FAM26F	546	protein_coding	mRNA	0.0422801	0.568707	0.790002	down	0.091492	0.294481	0.404539	0	0	0
ENST00000368686	ENSG00000160679	CHTOP	2250	protein_coding	mRNA	0.0107843	0.367318	0.754001	down	5.699	6.22607	6.03687	3.89797	4.52622	4.38845
ENST00000368774	ENSG00000188690	UROS	744	protein_coding	mRNA	0.0493921	0.60968	0.774118	down	0.691582	0.792193	1.08012	0.279289	0.555581	0.508239
ENST00000369101	ENSG00000148908	RGS10	738	protein_coding	mRNA	0.0256391	0.440252	0.830214	down	0.291329	0.124186	0.231641	0.031182	0	0
ENST00000369167	ENSG00000203814	HIST2H2BF	1954	protein_coding	mRNA	0.00121725	0.274672	0.793507	down	152.577	157.492	171.922	127.184	127.743	128.431
ENST00000369220	ENSG00000112237	CCNC	2118	protein_coding	mRNA	0.0429823	0.572287	0.667345	down	0.247782	0.174893	2.02591	0.415125	0.083747	0
ENST00000369234	ENSG00000151892	GFRA1	1807	protein_coding	mRNA	0.00259984	0.367318	0.651312	down	33.9474	35.268	27.716	20.9435	18.7704	21.3729
ENST00000369236	ENSG00000151892	GFRA1	9109	protein_coding	mRNA	0.00957954	0.367318	0.692665	down	25.5726	25.3799	26.3327	18.4068	18.7744	15.69
ENST00000369298	ENSG00000131788	PIAS3	2761	protein_coding	mRNA	0.0228525	0.414913	0.627229	down	0.602309	0	1.27052	0	0	0
ENST00000369321	ENSG00000165806	CASP7	2620	protein_coding	mRNA	0.0277203	0.459081	0.753481	down	0	0	1.20689	0	0.011947	0.059264
ENST00000369404	ENSG00000023041	ZDHHC6	1721	protein_coding	mRNA	0.022662	0.413084	0.710228	down	1.46175	1.46999	2.16623	0.726069	0.938567	1.14302
ENST00000369407	ENSG00000092621	PHGDH	3180	protein_coding	mRNA	0.00719191	0.367318	0.759938	down	0.533307	0.344378	0.505639	0.139095	0.08757	0.112486
ENST00000369409	ENSG00000092621	PHGDH	1913	protein_coding	mRNA	0.00183294	0.332027	0.604409	down	30.1959	26.2446	36.5706	17.2767	19.3148	18.8463
ENST00000369476	ENSG00000214827	MTCP1	2274	protein_coding	mRNA	0.0146044	0.367318	0.830445	down	1.05531	1.09951	1.04665	0.669358	0.8246	0.655173
ENST00000369479	ENSG00000182712	CMC4	864	protein_coding	mRNA	0.044232	0.579622	0.775786	down	0.398646	0.800936	0.067393	0	0	0.168268
ENST00000369496	ENSG00000163399	ATP1A1	3572	protein_coding	mRNA	0.011699	0.367318	0.804378	down	0.108862	0.096826	0.78522	0.077163	0.037973	0.092496
ENST00000369756	ENSG00000112773	FAM46A	5537	protein_coding	mRNA	0.00470537	0.367318	0.730289	down	0.309227	0.316957	0.713392	0.092129	0	0.099665
ENST00000369808	ENSG00000013563	DNASE1L1	2666	protein_coding	mRNA	0.0162561	0.367318	0.68617	down	0.861544	0.583448	3.24018	0.524816	0.832378	0.677777
ENST00000369936	ENSG00000116299	KIAA1324	5968	retained_intron	lncRNA	0.0405503	0.558567	0.766293	down	0.584248	0.363053	0.415826	0.219995	0.088977	0.034941
ENST00000370093	ENSG00000067829	IDH3G	1662	protein_coding	mRNA	0.0407926	0.560139	0.609891	down	0.790077	1.07804	4.27944	0.65305	0.897494	0.661974
ENST00000370161	ENSG00000162688	AGL	6923	protein_coding	mRNA	0.00112256	0.264253	0.772724	down	0.491217	0.557253	0	0	0	0
ENST00000370270	ENSG00000147394	ZNF185	2166	protein_coding	mRNA	0.0168085	0.367318	0.74771	down	0.276701	0.445005	0.431369	0	0.108793	0
ENST00000370474	ENSG00000154079	SDHAF4	1196	protein_coding	mRNA	0.0068771	0.367318	0.57437	down	3.24498	3.61109	3.4709	1.8809	1.525	1.2809
ENST00000370871	ENSG00000116791	CRYZ	1292	protein_coding	mRNA	0.0185752	0.373132	0.532553	down	1.22157	0.425363	1.02172	0	0	0
ENST00000370918	ENSG00000012660	ELOVL5	3081	protein_coding	mRNA	0.0413239	0.563482	0.488086	down	0.004975	0.303761	4.26119	0.005818	0.007675	0.002914
ENST00000371001	ENSG00000196074	SYCP2	5479	protein_coding	mRNA	2.35694e-06	0.0188386	0.509459	down	0.933437	0.851047	1.07868	0	0	0
ENST00000371016	ENSG00000198160	MIER1	1802	protein_coding	mRNA	0.0178515	0.367318	0.80645	down	0	0	0.74359	0	0	0
ENST00000371438	ENSG00000124813	RUNX2	5698	protein_coding	mRNA	0.00138539	0.296953	0.757929	down	0.140361	0	1.05512	0.096022	0	0.03886
ENST00000371528	ENSG00000203995	ZYG11A	4469	protein_coding	mRNA	0.0301456	0.48116	0.810607	down	3.88125	3.84579	3.50385	2.58722	3.18961	2.7277
ENST00000371708	ENSG00000112759	SLC29A1	2159	protein_coding	mRNA	0.0224663	0.411108	0.770464	down	0.395726	0.239586	0.42582	0.005208	0.140626	0
ENST00000371724	ENSG00000112759	SLC29A1	2275	protein_coding	mRNA	8.10625e-05	0.0895009	0.580609	down	0.288652	0	2.31262	0	0	0
ENST00000371941	ENSG00000124126	PREX1	6636	protein_coding	mRNA	0.0156857	0.367318	0.704712	down	118.332	99.1619	104.226	79.9811	72.7175	72.7094
ENST00000372114	ENSG00000172315	TP53RK	3515	protein_coding	mRNA	0.000974642	0.244825	0.402249	down	6.04062	6.59636	5.5622	1.90732	1.5182	2.06001
ENST00000372121	ENSG00000158296	SLC13A3	848	protein_coding	mRNA	0.0128125	0.367318	0.730577	down	0.229409	0.445224	0.43341	0	0	0
ENST00000372215	ENSG00000130717	UCK1	2167	protein_coding	mRNA	0.00168823	0.323137	0.477382	down	12.9254	14.3745	13.5402	6.19906	6.45688	5.28675
ENST00000372338	ENSG00000130720	FIBCD1	3253	protein_coding	mRNA	0.00419049	0.367318	0.653814	down	2.4447	2.06268	2.77149	1.13078	1.4263	1.20983
ENST00000372508	ENSG00000164011	ZNF691	1577	protein_coding	mRNA	0.0393848	0.550203	0.802833	down	0.004649	0	0.888269	0	0	0.086669
ENST00000372554	ENSG00000148341	SH3GLB2	1985	protein_coding	mRNA	0.0077519	0.367318	0.739923	down	0.066737	0.007878	1.22637	0.018212	0.037974	0.039033
ENST00000372584	ENSG00000127124	HIVEP3	12319	protein_coding	mRNA	0.00532181	0.367318	0.620368	down	0.702655	0.787709	1.17365	0.154363	0.290628	0.096705
ENST00000372595	ENSG00000010803	SCMH1	3231	protein_coding	mRNA	0.0314374	0.491882	0.818213	down	0.341079	0.49894	0.159988	0.158669	0.027061	0.036666
ENST00000372708	ENSG00000084070	SMAP2	2473	protein_coding	mRNA	0.018254	0.369459	0.823651	down	0.281534	0.112304	0.28088	0.011699	0.001917	0.022183
ENST00000372879	ENSG00000196683	TOMM7	514	protein_coding	mRNA	1.63921e-05	0.0503616	0.723612	down	0.338465	0.267018	0.51623	0	0	0
ENST00000372945	ENSG00000182180	MRPS16	2634	protein_coding	mRNA	0.0380979	0.542134	0.687001	down	11.122	7.06426	24.2796	8.18905	8.13719	10.2238
ENST00000372981	ENSG00000102362	SYTL4	4847	protein_coding	mRNA	0.0125452	0.367318	0.81058	down	0.716993	0.698599	0.293949	0.296234	0.204257	0.232266
ENST00000373026	ENSG00000204084	INPP5B	3230	protein_coding	mRNA	0.0319546	0.496409	0.82094	down	0.274837	0.051802	0.3697	0.050242	0	0
ENST00000373093	ENSG00000163873	GRIK3	2955	protein_coding	mRNA	0.0187868	0.375379	0.69537	down	0.490824	0.409977	0.682417	0	0	0.218936
ENST00000373173	ENSG00000155008	APOOL	1279	protein_coding	mRNA	0.027816	0.459712	0.814369	down	5.81644	6.96626	5.1171	4.20559	4.79534	4.74069
ENST00000373241	ENSG00000079332	SAR1A	2996	protein_coding	mRNA	0.0458119	0.588846	0.524296	down	13.2336	15.9381	15.1517	7.67941	5.11125	9.59579
ENST00000373389	ENSG00000156639	ZFAND3	531	protein_coding	mRNA	0.0229072	0.415476	0.723906	down	0.517395	0.660983	0.997608	0.38996	0.167697	0.219056
ENST00000373477	ENSG00000134684	YARS	3238	protein_coding	mRNA	0.0139966	0.367318	0.770544	down	12.874	12.8854	14.6712	11.1938	9.49774	10.0117
ENST00000373501	ENSG00000176261	ZBTB8OS	598	protein_coding	mRNA	0.0467435	0.592985	0.548502	down	1.6291	0.370459	1.97715	0.175367	0.244599	0.325289
ENST00000373554	ENSG00000147099	HDAC8	833	protein_coding	mRNA	0.00726122	0.367318	0.703546	down	1.24539	1.3127	2.04282	0.907947	0.815167	0.664163
ENST00000373624	ENSG00000119522	DENND1A	5010	protein_coding	mRNA	0.0383996	0.54403	0.721279	down	4.42419	3.30277	6.52029	2.95372	3.75354	2.78719
ENST00000373766	ENSG00000156711	MAPK13	6196	protein_coding	mRNA	0.0366335	0.531344	0.499236	down	0.313981	0.447858	4.39516	0.037969	0.071519	0.42386
ENST00000373874	ENSG00000118707	TGIF2	3432	protein_coding	mRNA	0.0401891	0.556121	0.773463	down	0.502033	0.440019	0.437803	0.230346	0	0.167764
ENST00000373932	ENSG00000131043	AAR2	2689	protein_coding	mRNA	0.0421978	0.568297	0.801481	down	0.917604	1.08187	1.1865	0.600145	0.81951	0.561874
ENST00000374118	ENSG00000136883	KIF12	2003	protein_coding	mRNA	0.0475071	0.598057	0.589093	down	18.9369	12.5272	17.3911	8.20823	8.22784	11.278
ENST00000374765	ENSG00000076864	RAP1GAP	3271	protein_coding	mRNA	0.0136138	0.367318	0.814784	down	0.096491	0.175583	0.390997	0	0	0
ENST00000374804	ENSG00000001497	LAS1L	2261	protein_coding	mRNA	0.0484628	0.603744	0.754652	down	0.675217	0.302109	2.58191	0.786825	0.630485	0.340878
ENST00000374888	ENSG00000198455	ZXDB	5894	protein_coding	mRNA	0.0178515	0.367318	0.562146	down	0	0	3.43096	0	0	0
ENST00000374922	ENSG00000204272	LINC01420	1529	protein_coding	mRNA	0.0403607	0.557187	0.675176	down	5.07185	6.49006	5.14412	4.11666	3.22544	2.90102
ENST00000375011	ENSG00000119514	GALNT12	2735	protein_coding	mRNA	0.00372285	0.367318	0.683171	down	1.9719	1.67566	1.85881	0.896624	1.04739	0.87621
ENST00000375400	ENSG00000197321	SVIL	6729	protein_coding	mRNA	0.0313502	0.491416	0.824765	down	8.8595	8.57977	7.62204	6.2981	7.30438	6.398
ENST00000375412	ENSG00000188938	FAM120AOS	2771	protein_coding	mRNA	0.0338267	0.510339	0.676305	down	2.32584	3.37102	3.07797	1.52299	1.85336	1.55327
ENST00000375457	ENSG00000126226	PCID2	2372	protein_coding	mRNA	0.00817979	0.367318	0.7879	down	0.459933	0.503995	0.732275	0.275119	0.27469	0.173071
ENST00000375638	ENSG00000204387	C6orf48	847	protein_coding	mRNA	0.00956904	0.367318	0.743513	down	27.6762	26.3831	36.94	20.7129	23.269	23.412
ENST00000375732	ENSG00000150054	MPP7	5063	protein_coding	mRNA	4.05492e-05	0.0865336	0.118308	down	6.76943	8.20137	7.5594	0.002633	0.007552	0
ENST00000375733	ENSG00000116809	ZBTB17	2770	protein_coding	mRNA	0.0266161	0.44871	0.681394	down	0.802201	0.662246	0.339491	0.222865	0	0
ENST00000375852	ENSG00000101336	HCK	2082	protein_coding	mRNA	0.00236807	0.364864	0.682402	down	0.636514	0.520049	0.301829	0	0	0
ENST00000375880	ENSG00000263020	XXbac-BPG32J3.22	2487	protein_coding	mRNA	0.0247754	0.432229	0.361634	down	1.24414	1.22591	20.7811	0.567382	1.22909	1.11967
ENST00000375885	ENSG00000204435	CSNK2B	1061	protein_coding	mRNA	0.00392515	0.367318	0.278379	down	0.728975	0.331719	27.5449	0.365418	0.38726	0.209707
ENST00000375972	ENSG00000136758	YME1L1	2517	protein_coding	mRNA	0.0320931	0.497396	0.625653	down	0.198512	0.013982	3.50301	0.029112	0.245182	0.315918
ENST00000375976	ENSG00000204463	BAG6	3644	protein_coding	mRNA	0.0342267	0.513342	0.528765	down	58.6257	33.2933	56.1539	28.3345	23.713	24.183
ENST00000376286	ENSG00000175198	PCCA	2481	protein_coding	mRNA	0.0105533	0.367318	0.476052	down	1.39827	0.931672	1.62992	0.36916	0	0
ENST00000376463	ENSG00000196781	TLE1	1115	protein_coding	mRNA	0.0189545	0.377201	0.761778	down	6.31377	7.03527	8.22973	4.96108	5.61423	5.24531
ENST00000376667	ENSG00000116670	MAD2L2	872	protein_coding	mRNA	0.0126483	0.367318	0.243328	down	6.07923	8.37589	6.48142	0.459834	0.630147	1.93172
ENST00000376669	ENSG00000116670	MAD2L2	864	protein_coding	mRNA	0.0253555	0.437261	0.407751	down	3.68437	1.58256	2.08485	0.390195	0.493457	0.216881
ENST00000376672	ENSG00000116670	MAD2L2	1002	protein_coding	mRNA	0.0223885	0.410647	0.536757	down	2.1416	1.09816	1.51476	0.444253	0.424357	0.257617
ENST00000376862	ENSG00000101463	SYNDIG1	2522	protein_coding	mRNA	0.0134233	0.367318	0.776048	down	0.383094	0.41841	0.601504	0.231415	0.135771	0.072828
ENST00000377192	ENSG00000184445	KNTC1	1519	retained_intron	lncRNA	0.00232658	0.362924	0.815242	down	1.5053	1.76262	1.00614	0.865967	0.927985	0.9955
ENST00000377469	ENSG00000204792	LINC01291	3662	lincRNA	lncRNA	0.0200996	0.388253	0.647528	down	0.899077	0.547007	1.01994	0.365874	0.089108	0.120463
ENST00000377494	ENSG00000068831	RASGRP2	2983	protein_coding	mRNA	0.0044688	0.367318	0.814463	down	0.335676	0.275919	0.147381	0.013421	0	0.022426
ENST00000377614	ENSG00000227449	RP11-111F5.5	1890	processed_transcript	lncRNA	0.0300275	0.480488	0.778883	down	0.247893	0.373872	0.539129	0.127241	0	0.132401
ENST00000377973	ENSG00000138433	CIR1	561	protein_coding	mRNA	0.00498358	0.367318	0.711699	down	0.561824	0.53889	0.880334	0.107932	0.243343	0.219585
ENST00000378058	ENSG00000172264	MACROD2	4025	protein_coding	mRNA	0.0046326	0.367318	0.731467	down	0.476673	0.576501	0.263075	0	0.113831	0
ENST00000378059	ENSG00000112312	GMNN	688	protein_coding	mRNA	0.0222095	0.409208	0.703757	down	0.449867	0.718241	0.791333	0.191458	0.231848	0.076503
ENST00000378610	ENSG00000145996	CDKAL1	3115	protein_coding	mRNA	0.0379404	0.540924	0.754575	down	0.497361	0.26012	0.418554	6.3e-05	0.161084	0.00016
ENST00000378700	ENSG00000172201	ID4	2344	protein_coding	mRNA	0.00716103	0.367318	0.597448	down	1.01499	0.966215	0.894793	0.097647	0.084452	0.334269
ENST00000378815	ENSG00000127328	RAB3IP	2386	protein_coding	mRNA	0.020631	0.394637	0.663599	down	0.616471	0.796643	1.3316	0.349548	0.128932	0.362363
ENST00000378852	ENSG00000166181	API5	3714	protein_coding	mRNA	0.042104	0.567964	0.432459	down	16.4126	8.08082	7.44854	3.50802	3.8424	3.7311
ENST00000378937	ENSG00000165609	NUDT5	919	protein_coding	mRNA	0.0462802	0.591062	0.823935	down	0.412628	0.167358	0.626742	0.253024	0.130217	0.107681
ENST00000379024	ENSG00000091129	NRCAM	5782	protein_coding	mRNA	0.00231397	0.362431	0.588301	down	9.69802	12.2059	6.82659	5.25178	4.6223	4.95476
ENST00000379277	ENSG00000089063	TMEM230	1536	protein_coding	mRNA	0.0385245	0.544493	0.805675	down	0.36733	0.194771	0.473588	0.171724	0	0.104488
ENST00000379279	ENSG00000089063	TMEM230	1636	protein_coding	mRNA	0.032123	0.497541	0.80009	down	0.536982	0.146288	2.19254	0.443165	0.438463	0.611256
ENST00000379299	ENSG00000089063	TMEM230	1642	protein_coding	mRNA	0.00424342	0.367318	0.749271	down	2.25237	1.56015	6.15953	2.35817	1.91151	1.99197
ENST00000379460	ENSG00000088826	SMOX	2230	protein_coding	mRNA	0.0130529	0.367318	0.713287	down	0.051544	0.037593	1.37888	0.034538	0	0.039815
ENST00000379649	ENSG00000120686	UFM1	846	protein_coding	mRNA	0.0177933	0.367318	0.749145	down	0.533361	0.325523	0.574164	0.06126	0.077259	0.200032
ENST00000379805	ENSG00000131828	PDHA1	734	protein_coding	mRNA	0.0188093	0.375435	0.607512	down	0.529946	0.604391	3.67295	0.421524	0.4644	0.470405
ENST00000380394	ENSG00000137154	RPS6	1387	protein_coding	mRNA	0.00172391	0.326683	0.742122	down	236.316	221.789	249.446	178.087	180.402	168.244
ENST00000380557	ENSG00000255529	POLR2M	3629	protein_coding	mRNA	0.00651439	0.367318	0.679998	down	0.520001	0.151761	1.03841	0.073251	0.075738	0.050478
ENST00000380821	ENSG00000164975	SNAPC3	5680	protein_coding	mRNA	0.0109439	0.367318	0.762252	down	3.50216	3.62108	2.86539	1.98823	2.37892	2.42903
ENST00000381106	ENSG00000205663	RP11-706O15.5	1099	lincRNA	lncRNA	0.0460281	0.590038	0.666595	down	0.699993	0.393708	1.125	0.1248	0	0.403856
ENST00000381683	ENSG00000100129	EIF3L	1599	protein_coding	mRNA	0.0178515	0.367318	0.586845	down	0	0	2.96493	0	0	0
ENST00000381718	ENSG00000139496	NUP58	2489	protein_coding	mRNA	0.0164125	0.367318	0.800122	down	1.19968	1.52625	0.9837	0.677715	0.863504	0.748641
ENST00000381885	ENSG00000168781	PPIP5K1	5596	protein_coding	mRNA	0.0270632	0.45264	0.550789	down	2.15132	3.35799	1.38935	1.1175	0.553307	0.541955
ENST00000381980	ENSG00000154274	C4orf19	1943	protein_coding	mRNA	0.0187675	0.375206	0.599378	down	2.73696	3.85361	0.283138	0.817776	0.375505	0.641943
ENST00000382252	ENSG00000205903	ZNF316	5392	protein_coding	mRNA	0.00270458	0.367318	0.55632	down	7.29257	8.86027	6.51469	3.90212	3.82243	3.3242
ENST00000382422	ENSG00000198604	BAZ1A	5775	protein_coding	mRNA	0.00812999	0.367318	0.414457	down	8.78849	6.6253	3.55184	1.8819	1.61613	1.91618
ENST00000382477	ENSG00000099625	CBARP	2453	protein_coding	mRNA	0.00796861	0.367318	0.546652	down	1.42788	0.923699	1.46746	0.140259	0.221264	0.389138
ENST00000382480	ENSG00000109625	CPZ	2538	protein_coding	mRNA	0.0178515	0.367318	0.767307	down	0	0	0.982846	0	0	0
ENST00000382549	ENSG00000159079	C21orf59	2503	protein_coding	mRNA	0.0445759	0.581754	0.504637	down	0.766219	2.00004	2.11769	0.209199	0.412446	0.283978
ENST00000382754	ENSG00000150456	N6AMT2	875	protein_coding	mRNA	0.0118617	0.367318	0.817957	down	0.137477	0.0518	0.790559	0.090965	0.02799	0.134195
ENST00000383329	ENSG00000204525	HLA-C	1554	protein_coding	mRNA	2.90538e-05	0.0725254	0.649837	down	0.32777	0.187261	1.11817	0	0	0
ENST00000383808	ENSG00000206567	AC022007.5	1897	lincRNA	lncRNA	0.0381	0.542134	0.449054	down	2.33453	1.89748	1.11369	0	0.742417	0
ENST00000383814	ENSG00000163701	IL17RE	2704	protein_coding	mRNA	0.031566	0.492928	0.642081	down	0.614662	0	1.25862	0	0	0.073699
ENST00000384151	ENSG00000206878	SNORA51	125	snoRNA	ncRNA	0.0178515	0.367318	0.760225	down	0	0	1.03094	0	0	0
ENST00000384476	ENSG00000207205	RNVU1-15	165	snRNA	ncRNA	0.0178515	0.367318	0.542589	down	0	0	3.85559	0	0	0
ENST00000388798	ENSG00000104450	SPAG1	3852	protein_coding	mRNA	0.0178515	0.367318	0.505938	down	0	0	4.81756	0	0	0
ENST00000389003	ENSG00000007202	KIAA0100	6852	protein_coding	mRNA	0.0177041	0.367318	0.309971	down	0.008312	0	21.1955	0.0776	0.006932	0.011242
ENST00000389061	ENSG00000211456	SACM1L	3723	protein_coding	mRNA	0.0444544	0.580709	0.823282	down	5.194	5.90391	5.38645	3.99993	4.76042	4.25102
ENST00000389373	ENSG00000032742	IFT88	575	protein_coding	mRNA	0.0288197	0.46982	0.702162	down	1.43207	1.41848	1.862	0.632205	0.747082	1.09666
ENST00000389672	ENSG00000080224	EPHA6	3971	protein_coding	mRNA	0.00661985	0.367318	0.793335	down	0.27472	0.271417	0.701582	0.188543	0.088935	0.115386
ENST00000389858	ENSG00000205213	LGR4	5163	protein_coding	mRNA	0.0146545	0.367318	0.717634	down	0.551956	0.283427	0.359058	0	0	0
ENST00000391149	ENSG00000212451	RNU11-4P	133	snRNA	ncRNA	0.0178515	0.367318	0.815015	down	0	0	0.696627	0	0	0
ENST00000392038	ENSG00000105221	AKT2	5300	protein_coding	mRNA	0.0224485	0.411029	0.792835	down	16.7379	15.8107	10.2149	10.6848	10.5311	10.5589
ENST00000392179	ENSG00000158864	NDUFS2	2064	protein_coding	mRNA	0.00678065	0.367318	0.722226	down	22.0136	22.3014	19.1753	13.8484	14.5987	16.1923
ENST00000392222	ENSG00000114942	EEF1B2	1098	protein_coding	mRNA	0.0133786	0.367318	0.744009	down	161.444	160.662	137.107	102.713	113.188	121.826
ENST00000392391	ENSG00000163964	PIGX	3057	protein_coding	mRNA	0.0305304	0.484563	0.656173	down	7.02261	6.32692	2.24721	2.26937	2.70393	2.88495
ENST00000392438	ENSG00000198836	OPA1	6340	protein_coding	mRNA	0.0141227	0.367318	0.786229	down	9.32923	10.7653	8.81642	7.67238	7.26286	6.91503
ENST00000392490	ENSG00000135549	PKIB	1811	protein_coding	mRNA	0.0132062	0.367318	0.525518	down	2.05366	1.65986	1.82208	0.537406	0.246789	0.740072
ENST00000392622	ENSG00000189171	S100A13	547	protein_coding	mRNA	0.0218304	0.406872	0.177237	down	4.03256	4.36505	14.4817	1.78841	0	0
ENST00000392973	ENSG00000003249	DBNDD1	2689	protein_coding	mRNA	0.0434729	0.575721	0.45441	down	1.68555	0.335768	6.66236	1.1594	0.380928	0.109815
ENST00000393104	ENSG00000150593	PDCD4	3697	protein_coding	mRNA	0.0076541	0.367318	0.630821	down	0.995803	0.739041	0.366396	0.060624	0.048249	0.023036
ENST00000393164	ENSG00000070961	ATP2B1	3127	protein_coding	mRNA	0.0181049	0.368307	0.746771	down	0	0.001482	1.12444	0	0	0
ENST00000393241	ENSG00000020922	MRE11A	2604	protein_coding	mRNA	0.0462206	0.591043	0.600164	down	0.460014	0.866013	1.82725	0.452888	0.123224	0.106587
ENST00000393422	ENSG00000050820	BCAR1	4064	protein_coding	mRNA	0.0287052	0.468734	0.761919	down	1.18698	1.24093	0.004509	0.204561	0.185428	0.341496
ENST00000393612	ENSG00000103051	COG4	2756	protein_coding	mRNA	0.0361217	0.52864	0.553805	down	0.551559	0.437856	8.90419	0.977027	0.84558	0.399582
ENST00000393648	ENSG00000160867	FGFR4	2733	protein_coding	mRNA	0.0160746	0.367318	0.791962	down	0.368604	0.448061	0.20434	0.131808	0.020654	0
ENST00000393693	ENSG00000074317	SNCB	1234	protein_coding	mRNA	4.88837e-05	0.0865336	0.752496	down	0.500867	0.691225	0	0	0	0
ENST00000393721	ENSG00000089820	ARHGAP4	2721	protein_coding	mRNA	0.0482447	0.602468	0.746397	down	0	0	1.37754	0	0	0.135784
ENST00000393812	ENSG00000157593	SLC35B2	2043	protein_coding	mRNA	0.0119644	0.367318	0.716689	down	6.72738	5.38797	22.6731	7.21785	7.62823	6.41906
ENST00000393841	ENSG00000112759	SLC29A1	2485	protein_coding	mRNA	0.0103664	0.367318	0.656196	down	0.464975	0.658007	1.24487	0.209159	0.194988	0.126926
ENST00000394013	ENSG00000181852	RNF41	2452	protein_coding	mRNA	0.0381989	0.542732	0.669436	down	0.394262	0.028571	5.01427	0.313045	0.692478	0.52093
ENST00000394053	ENSG00000065911	MTHFD2	4456	protein_coding	mRNA	0.0039985	0.367318	0.812177	down	16.5807	16.1529	21.4173	14.0902	14.9229	14.7109
ENST00000394070	ENSG00000124356	STAMBP	6691	protein_coding	mRNA	0.0364219	0.52964	0.725349	down	2.1474	2.4859	2.21417	1.68897	1.10008	1.36745
ENST00000394426	ENSG00000172819	RARG	2640	protein_coding	mRNA	3.50429e-05	0.0816628	0.311857	down	2.16335	2.5563	1.99501	0	0	0
ENST00000394665	ENSG00000109475	RPL34	529	protein_coding	mRNA	0.0115469	0.367318	0.456183	down	20.4676	20.2158	35.09	8.8891	10.7994	13.527
ENST00000394667	ENSG00000109475	RPL34	441	protein_coding	mRNA	0.00563942	0.367318	0.45839	down	30.6047	25.757	44.7291	12.5826	15.157	17.3128
ENST00000394685	ENSG00000103888	CEMIP	7357	protein_coding	mRNA	0.0327521	0.502762	0.772254	down	0.630153	0.471554	0	0	0.010413	0.022105
ENST00000394785	ENSG00000164038	SLC9B2	3126	protein_coding	mRNA	0.0178515	0.367318	0.82007	down	0	0	0.669729	0	0	0
ENST00000394861	ENSG00000171150	SOCS5	4058	protein_coding	mRNA	0.0147068	0.367318	0.665931	down	0.159366	0.017971	3.23651	0.181205	0.267766	0.231487
ENST00000394971	ENSG00000167397	VKORC1	664	protein_coding	mRNA	0.000182682	0.1089	0.618708	down	0.970968	0.483597	4.10214	0.637325	0.654724	0.568152
ENST00000395397	ENSG00000025434	NR1H3	1501	protein_coding	mRNA	5.53847e-05	0.0865336	0.792044	down	0.131621	0	0.723176	0.032998	0	0.017458
ENST00000395589	ENSG00000174446	SNAPC5	749	protein_coding	mRNA	0.0364406	0.5297	0.61448	down	0.894668	1.2123	2.18021	0.258554	0.610962	0.627064
ENST00000395738	ENSG00000128165	ADM2	4276	protein_coding	mRNA	0.0181505	0.368463	0.756212	down	2.22925	2.2498	2.5182	1.32663	1.76416	1.51332
ENST00000395762	ENSG00000077238	IL4R	3685	protein_coding	mRNA	0.00537566	0.367318	0.531123	down	4.28652	3.54202	5.19234	1.51324	2.15651	1.92519
ENST00000395787	ENSG00000149089	APIP	1366	protein_coding	mRNA	0.0350055	0.519683	0.790443	down	12.3232	13.8289	15.1585	10.0072	11.5114	10.6638
ENST00000395823	ENST00000395823	HMGB1P10-001	563	processed_pseudogene	lncRNA	0.0454945	0.58684	0.786237	down	0	0	1.02799	0	0	0.103902
ENST00000396026	ENSG00000125846	ZNF133	2717	protein_coding	mRNA	0.00557663	0.367318	0.814161	down	0.551702	0.576231	0.636839	0.330309	0.235655	0.32373
ENST00000396526	ENSG00000129515	SNX6	3398	protein_coding	mRNA	0.0256373	0.440252	0.633197	down	5.69868	3.69113	7.90371	3.27179	3.775	2.79153
ENST00000396618	ENSG00000100473	COCH	2536	protein_coding	mRNA	0.00387705	0.367318	0.671857	down	0.694988	0.538607	0.304746	0	0	0
ENST00000396648	ENSG00000166452	AKIP1	1084	protein_coding	mRNA	0.0278792	0.460249	0.775013	down	1.30279	1.50035	1.62362	0.95282	0.763451	1.06665
ENST00000396761	ENSG00000198925	ATG9A	3799	protein_coding	mRNA	0.0144218	0.367318	0.43358	down	2.97792	6.79049	1.26004	0.564585	0.928789	0.603177
ENST00000396774	ENSG00000047249	ATP6V1H	1892	protein_coding	mRNA	0.0402328	0.556405	0.611518	down	1.55754	1.86297	1.6299	0.315517	0.669362	0.984742
ENST00000396984	ENSG00000180596	HIST1H2BC	571	protein_coding	mRNA	0.000439375	0.169279	0.685252	down	169.291	176.178	193.031	124.351	122.517	122.718
ENST00000397061	ENSG00000213965	NUDT19	2967	protein_coding	mRNA	0.0288537	0.469878	0.355734	down	8.71702	2.64763	12.4634	2.09755	2.10109	1.62652
ENST00000397122	ENSG00000197905	TEAD4	1396	protein_coding	mRNA	0.0331215	0.505834	0.789843	down	0.279151	0.703427	0	0	0	0
ENST00000397332	ENSG00000116990	MYCL	3256	protein_coding	mRNA	0.00119057	0.272762	0.763784	down	0.524012	0.517664	0.259913	0.061362	0.068032	0.111194
ENST00000397377	ENSG00000100802	C14orf93	1776	protein_coding	mRNA	0.0311511	0.489833	0.688022	down	0.512239	0.716744	0.782658	0	0.208123	0.261475
ENST00000397440	ENSG00000100462	PRMT5	1907	protein_coding	mRNA	0.0320372	0.497047	0.644675	down	0.671473	0.305126	1.12528	0.329329	0	0
ENST00000397510	ENSG00000177042	TMEM80	1094	protein_coding	mRNA	0.0233765	0.419899	0.797816	down	1.3359	1.33257	1.78313	0.901503	0.919522	1.16921
ENST00000397581	ENSG00000147862	NFIB	3318	protein_coding	mRNA	0.021377	0.403181	0.681514	down	1.86527	1.7167	1.43227	1.06625	0.72586	0.648834
ENST00000398213	ENSG00000170473	PYM1	1073	protein_coding	mRNA	0.0177704	0.367318	0.690263	down	0.477665	0.965224	0.376017	0.093965	0.051707	0.094503
ENST00000398453	ENSG00000170545	SMAGP	1062	protein_coding	mRNA	0.0196835	0.38412	0.739191	down	2.30725	2.24807	2.03398	1.32643	1.60492	1.14648
ENST00000398529	ENSG00000138069	RAB1A	1198	protein_coding	mRNA	0.0224067	0.410647	0.82994	down	0.288343	0.398691	0.615121	0.184036	0.210922	0.192448
ENST00000398658	ENSG00000162927	PUS10	1227	protein_coding	mRNA	0.0291777	0.472092	0.644197	down	0.57325	0.365853	1.22473	0.363421	0	0.008721
ENST00000398676	ENSG00000060339	CCAR1	565	retained_intron	lncRNA	0.0092105	0.367318	0.823603	down	0.296037	0.205203	0.292352	0.069105	0	0.063059
ENST00000398822	ENSG00000100030	MAPK1	1487	protein_coding	mRNA	0.00333384	0.367318	0.649288	down	1.60515	1.48681	1.24112	0.687671	0.544868	0.49659
ENST00000398919	ENSG00000157554	ERG	1868	protein_coding	mRNA	0.0109843	0.367318	0.791254	down	0.359587	0.390663	0.487224	0.140417	0.050376	0.177014
ENST00000399001	ENSG00000157538	DSCR3	821	protein_coding	mRNA	0.0087471	0.367318	0.731214	down	0.506722	0.313134	0.303409	0	0	0
ENST00000399006	ENSG00000132640	BTBD3	4826	protein_coding	mRNA	0.0113858	0.367318	0.725571	down	0.269186	0.307291	1.18541	0.147946	0.18763	0.105166
ENST00000399033	ENSG00000074621	SLC24A1	3323	protein_coding	mRNA	0.0315821	0.493116	0.773851	down	0.478662	0.331859	0.265167	0.140104	0	0
ENST00000399271	ENSG00000152591	DSPP	4331	protein_coding	mRNA	0.00166344	0.32287	0.805583	down	0.601054	0.678061	0.421638	0.281954	0.249103	0.217428
ENST00000399298	ENSG00000196932	TMEM26	5151	protein_coding	mRNA	0.0162901	0.367318	0.827695	down	0.238331	0.257203	0.331131	0	0.064396	0.114364
ENST00000399408	ENSG00000103222	ABCC1	6594	protein_coding	mRNA	0.0057057	0.367318	0.207427	down	5.66974	2.28811	4.50832	0.000262	0.093348	0.032839
ENST00000399464	ENSG00000215041	NEURL4	5200	protein_coding	mRNA	0.0140511	0.367318	0.660057	down	2.94796	3.73566	3.90419	2.13346	1.79053	2.06197
ENST00000399848	ENSG00000168675	LDLRAD4	8633	protein_coding	mRNA	0.0328886	0.503549	0.815189	down	0.371966	0.190677	0.161895	0	0.01676	0
ENST00000400259	ENSG00000070831	CDC42	2274	protein_coding	mRNA	0.0259193	0.442842	0.229903	down	6.38462	19.7362	0.785104	0.000439	0.008594	1.33089
ENST00000400518	ENSG00000184470	TXNRD2	2025	protein_coding	mRNA	0.0236727	0.421713	0.73394	down	0.04869	0.063833	1.3153	0.115925	0	0.038397
ENST00000400590	ENSG00000180776	ZDHHC20	1869	protein_coding	mRNA	0.0286849	0.468578	0.749518	down	6.65283	8.15006	5.97557	5.29867	4.90321	4.34811
ENST00000400825	ENSG00000130396	MLLT4	963	protein_coding	mRNA	0.0442801	0.57968	0.725841	down	2.40968	3.77504	1.50555	1.32887	1.25813	1.71893
ENST00000401412	ENSG00000106541	AGR2	782	protein_coding	mRNA	0.0430923	0.573292	0.637422	down	3.06695	3.63511	2.5001	2.1028	1.50118	1.12325
ENST00000402119	ENSG00000171903	CYP4F11	3161	protein_coding	mRNA	0.024587	0.430467	0.753913	down	0.425889	0.689633	0.421925	0.047167	0.208844	0.136865
ENST00000402142	ENSG00000100346	CACNA1I	10004	protein_coding	mRNA	0.0196874	0.38412	0.791781	down	0.893266	0.903933	0.95199	0.637402	0.526468	0.404537
ENST00000402194	ENSG00000196235	SUPT5H	3698	protein_coding	mRNA	0.0146629	0.367318	0.496843	down	3.5814	5.75535	1.12025	0.949046	1.24595	0.557157
ENST00000403525	ENSG00000084774	CAD	6900	protein_coding	mRNA	0.023305	0.419327	0.294289	down	3.60277	1.38301	7.17199	1.14683	0	0.260143
ENST00000405006	ENSG00000115970	THADA	6310	protein_coding	mRNA	0.0178673	0.367318	0.4058	down	4.39703	2.33093	2.22797	0.703461	0.556168	0.421589
ENST00000405140	ENSG00000120885	CLU	2098	protein_coding	mRNA	0.0258903	0.442535	0.402692	down	2.73888	1.02011	1.21627	0.075844	0	0
ENST00000405335	ENSG00000105982	RNF32	1938	protein_coding	mRNA	0.023911	0.423935	0.797226	down	0.156777	0.176825	0.772689	0.047798	0.149005	0.085297
ENST00000405396	ENSG00000196204	RNF216P1	899	processed_transcript	lncRNA	0.00165002	0.32287	0.612587	down	1.05398	0.957965	0.439469	0.092419	0.057976	0.093303
ENST00000406525	ENSG00000107929	LARP4B	681	protein_coding	mRNA	0.00742482	0.367318	0.627863	down	1.325	1.09191	0.607405	0.302458	0.1902	0.190803
ENST00000406548	ENSG00000182944	EWSR1	2207	protein_coding	mRNA	0.012434	0.367318	0.635979	down	52.1017	47.8004	54.6269	29.9059	37.4861	30.6777
ENST00000406549	ENSG00000185340	GAS2L1	1803	protein_coding	mRNA	0.0271118	0.4532	0.664217	down	0.547646	0	1.16555	0.088266	0	0
ENST00000406618	ENSG00000118960	HS1BP3	1375	protein_coding	mRNA	0.0235758	0.421546	0.751908	down	0.5393	0.77723	0.59165	0.275928	0.27889	0.123159
ENST00000406691	ENSG00000163001	CFAP36	1575	protein_coding	mRNA	0.00272915	0.367318	0.74782	down	0.845257	0.69982	2.18125	0.641435	0.631793	0.715715
ENST00000407067	ENSG00000110492	MDK	1026	protein_coding	mRNA	0.0450844	0.584371	0.450181	down	30.0595	12.3292	31.2469	10.5494	9.8611	9.72582
ENST00000407343	ENSG00000127947	PTPN12	704	protein_coding	mRNA	0.00962905	0.367318	0.788925	down	0.168477	0.16077	0.719941	0.048067	0.114674	0.043976
ENST00000407491	ENSG00000244627	RP3-449O17.1	574	processed_transcript	lncRNA	0.0378436	0.54007	0.696863	down	0.707391	0.277367	0.361087	0	0	0
ENST00000407526	ENSG00000106070	GRB10	2279	protein_coding	mRNA	0.00152974	0.311784	0.778619	down	0.125558	0.097012	0.614467	0	0	0
ENST00000407643	ENSG00000136295	TTYH3	4537	protein_coding	mRNA	0.0390097	0.547388	0.5994	down	1.43668	0.383478	3.39183	0.365959	0.651628	0.651232
[truncated: 1,793 more rows]
