# Supplementary material for: Transcriptomic Profiling of Breast Cancer Cells Induced by Tumor-Associated Macrophages Generates a Robust Prognostic Gene Signature
Source: Cancers (Basel). 2022 Oct 31;14(21):5364. doi: 10.3390/cancers14215364 (PMC9655582; doi:10.3390/cancers14215364)
Supplement: Supplementary file 1 [file cancers-14-05364-s001.zip › Supplementary Table S2.xlsx]

## Sheet: Supplementary table 2 H_v_L_DEr
	baseMean	log2FoldChange	lfcSE	stat	pvalue	padj
ENSG00000161634.12	299.278	8.312	0.823594	10.0923	5.9724e-24	2.36543e-19
ENSG00000252010.1	214.001	-6.00635	0.611078	-9.8291	8.43661e-23	1.6707e-18
ENSG00000247982.6	274.481	-2.96563	0.316254	-9.37736	6.76444e-21	8.93042e-17
ENSG00000252835.1	34.6659	-4.85438	0.520246	-9.33093	1.04943e-20	1.03909e-16
ENSG00000238741.1	62.7754	-5.13815	0.565462	-9.08664	1.02148e-19	8.09132e-16
ENSG00000162878.13	442.103	-1.93204	0.214494	-9.00743	2.10933e-19	1.39237e-15
ENSG00000150768.16	2122.45	1.06358	0.12071	8.81104	1.23992e-18	6.65755e-15
ENSG00000177455.15	302.59	-3.92992	0.446596	-8.79973	1.37145e-18	6.65755e-15
ENSG00000204710.2	223.824	5.07489	0.577568	8.78666	1.54071e-18	6.65755e-15
ENSG00000269404.7	598.45	-4.10366	0.467554	-8.77687	1.68094e-18	6.65755e-15
ENSG00000182103.5	63.1808	-3.99084	0.460422	-8.66779	4.40573e-18	1.4804e-14
ENSG00000175463.12	741.225	-2.40286	0.277282	-8.66575	4.48538e-18	1.4804e-14
ENSG00000140374.16	5313.87	1.56269	0.18338	8.52158	1.57388e-17	4.79501e-14
ENSG00000159958.7	361.791	-3.05287	0.360142	-8.47687	2.31335e-17	6.54446e-14
ENSG00000227507.3	1606.49	-3.56503	0.42273	-8.43334	3.3595e-17	8.49358e-14
ENSG00000104549.12	7432.24	1.68816	0.200236	8.43086	3.43123e-17	8.49358e-14
ENSG00000147679.12	2151.95	1.27926	0.152382	8.39505	4.65706e-17	1.08498e-13
ENSG00000104375.17	2363.34	0.991892	0.120557	8.22759	1.91013e-16	4.20291e-13
ENSG00000096006.12	813.261	4.30575	0.526464	8.17861	2.87125e-16	5.86777e-13
ENSG00000136628.18	15100.3	0.959593	0.11745	8.17019	3.07893e-16	5.86777e-13
ENSG00000095139.14	12350.8	0.776746	0.0950853	8.16894	3.11122e-16	5.86777e-13
ENSG00000065911.13	5224.23	1.07516	0.132258	8.12927	4.31891e-16	7.77522e-13
ENSG00000128218.8	135.687	-3.45348	0.425826	-8.11008	5.05869e-16	8.71106e-13
ENSG00000007312.13	346.302	-3.11104	0.384232	-8.09678	5.64309e-16	9.3125e-13
ENSG00000167483.19	206.949	-3.34403	0.413478	-8.08758	6.08628e-16	9.64214e-13
ENSG00000009765.15	391.327	3.88549	0.480816	8.08103	6.42199e-16	9.78267e-13
ENSG00000183723.13	4646.43	1.46539	0.181927	8.05478	7.96209e-16	1.16795e-12
ENSG00000229453.2	371.429	4.05378	0.503644	8.0489	8.35449e-16	1.18174e-12
ENSG00000235436.10	118.081	-4.08412	0.508473	-8.03212	9.58036e-16	1.30841e-12
ENSG00000204305.14	188.458	-1.45292	0.181206	-8.01806	1.07432e-15	1.39129e-12
ENSG00000165156.15	3104.04	1.02631	0.128027	8.01639	1.08897e-15	1.39129e-12
ENSG00000128438.10	33.8048	-3.59644	0.449569	-7.99974	1.24679e-15	1.54313e-12
ENSG00000157873.17	2202.83	-1.44278	0.180602	-7.98875	1.3631e-15	1.63597e-12
ENSG00000127022.15	53587.2	0.90793	0.113779	7.9798	1.46574e-15	1.70742e-12
ENSG00000260911.2	15.6226	-1.86805	0.234297	-7.973	1.54868e-15	1.75249e-12
ENSG00000104361.10	2270.87	1.45079	0.182294	7.95854	1.74088e-15	1.91525e-12
ENSG00000180096.12	542.18	-1.86764	0.234836	-7.95295	1.82123e-15	1.94951e-12
ENSG00000181617.6	1056.63	-4.15122	0.52361	-7.92808	2.22566e-15	2.31973e-12
ENSG00000265206.5	120.249	-2.79719	0.353078	-7.9223	2.33163e-15	2.36786e-12
ENSG00000067064.11	4190.5	1.36744	0.172916	7.90812	2.6131e-15	2.58736e-12
ENSG00000064201.16	68.8461	-1.83845	0.235414	-7.80942	5.74533e-15	5.54998e-12
ENSG00000187912.12	87.7462	-3.16828	0.406724	-7.78975	6.71406e-15	6.33136e-12
ENSG00000105369.10	1519.79	-3.31647	0.426623	-7.77378	7.61774e-15	6.8668e-12
ENSG00000200087.1	128.777	-3.14654	0.404772	-7.7736	7.62862e-15	6.8668e-12
ENSG00000182183.15	62.1827	-2.30791	0.297853	-7.74846	9.30134e-15	8.18642e-12
ENSG00000147676.14	16329.3	1.56743	0.202673	7.73375	1.04425e-14	8.99098e-12
ENSG00000268089.3	43.6131	3.48266	0.451856	7.70745	1.2836e-14	1.08166e-11
ENSG00000072818.12	975.626	-2.15403	0.280197	-7.68756	1.49967e-14	1.23741e-11
ENSG00000187957.8	152.267	4.14788	0.540173	7.6788	1.60582e-14	1.29796e-11
ENSG00000104921.15	138.792	-4.30178	0.560949	-7.66876	1.73672e-14	1.37569e-11
ENSG00000176853.16	5427.74	1.12677	0.147445	7.64197	2.13922e-14	1.66129e-11
ENSG00000168672.4	8244.56	1.29895	0.170062	7.63812	2.20409e-14	1.66346e-11
ENSG00000163527.10	13321	0.826186	0.108184	7.63685	2.22601e-14	1.66346e-11
ENSG00000147649.10	14288.3	0.994465	0.130387	7.627	2.40281e-14	1.76233e-11
ENSG00000258616.5	52.4045	5.2527	0.690866	7.60307	2.89194e-14	2.07767e-11
ENSG00000102893.16	5026.25	0.882663	0.116124	7.60104	2.93767e-14	2.07767e-11
ENSG00000130720.13	328.593	3.58611	0.473065	7.58058	3.44019e-14	2.39039e-11
ENSG00000104412.8	3152.86	0.997519	0.132292	7.54027	4.69006e-14	3.20266e-11
ENSG00000068831.19	460.793	-2.45826	0.326459	-7.53006	5.07163e-14	3.40452e-11
ENSG00000012124.17	969.612	-2.56382	0.34071	-7.52494	5.27456e-14	3.48173e-11
ENSG00000212464.1	13.5379	-3.60977	0.479929	-7.52148	5.41599e-14	3.51649e-11
ENSG00000113407.14	6751.22	0.918293	0.122141	7.51833	5.54816e-14	3.5442e-11
ENSG00000136573.14	187.26	-3.64841	0.485787	-7.51031	5.8987e-14	3.70832e-11
ENSG00000062524.16	73.2058	-2.68911	0.358483	-7.50136	6.3158e-14	3.9085e-11
ENSG00000185291.12	554.903	-1.21092	0.16152	-7.49703	6.52823e-14	3.95705e-11
ENSG00000288156.1	97.1259	-2.29329	0.305946	-7.49571	6.59408e-14	3.95705e-11
ENSG00000240505.9	77.6513	-3.47495	0.463819	-7.49205	6.78053e-14	4.0082e-11
ENSG00000142619.4	239.789	4.12492	0.550801	7.48895	6.94276e-14	4.04375e-11
ENSG00000230212.6	16.7196	2.59078	0.347112	7.46382	8.40491e-14	4.82442e-11
ENSG00000167476.10	110.734	-2.9099	0.390667	-7.44853	9.43828e-14	5.21995e-11
ENSG00000267121.6	136.43	-1.90681	0.256022	-7.44783	9.48862e-14	5.21995e-11
ENSG00000023892.11	1440.55	-1.46056	0.196106	-7.44782	9.48938e-14	5.21995e-11
ENSG00000205056.8	20.6542	-3.34389	0.449248	-7.44332	9.81852e-14	5.32702e-11
ENSG00000156738.18	1071.75	-3.70369	0.498377	-7.43151	1.07368e-13	5.74651e-11
ENSG00000168071.22	910.5	-1.93267	0.260127	-7.42973	1.0882e-13	5.74658e-11
ENSG00000145451.13	175.942	-4.36998	0.58941	-7.41416	1.22399e-13	6.37861e-11
ENSG00000268027.5	74.8122	-2.51749	0.340054	-7.40322	1.32918e-13	6.83684e-11
ENSG00000132185.18	244.062	-3.23862	0.438067	-7.39298	1.43577e-13	7.24972e-11
ENSG00000089199.10	436.465	4.6673	0.631396	7.39203	1.44606e-13	7.24972e-11
ENSG00000104413.18	10095.5	1.01143	0.137133	7.37557	1.63644e-13	8.0022e-11
ENSG00000197540.8	165.089	-2.74165	0.371721	-7.37556	1.63657e-13	8.0022e-11
ENSG00000172172.8	3578.05	1.37737	0.186823	7.37258	1.67357e-13	8.08332e-11
ENSG00000283787.2	92.7196	-2.02684	0.274991	-7.37058	1.69891e-13	8.10689e-11
ENSG00000239636.1	17.077	-1.89757	0.257584	-7.36679	1.74788e-13	8.24124e-11
ENSG00000227039.6	148.502	-2.31463	0.314281	-7.36482	1.77384e-13	8.26526e-11
ENSG00000136986.10	7261.1	0.902506	0.122656	7.35803	1.86645e-13	8.59564e-11
ENSG00000146085.8	2953.53	0.800014	0.108814	7.35213	1.95072e-13	8.88049e-11
ENSG00000104331.9	10037.3	0.995161	0.135768	7.32989	2.30338e-13	1.03668e-10
ENSG00000140368.13	384.91	-2.08478	0.284609	-7.32507	2.38778e-13	1.06259e-10
ENSG00000100918.13	336.767	-1.37798	0.188706	-7.30226	2.82969e-13	1.24525e-10
ENSG00000115085.14	506.881	-2.43459	0.333614	-7.29763	2.92876e-13	1.27469e-10
ENSG00000180549.8	51.9327	-2.506	0.344863	-7.26667	3.68469e-13	1.58626e-10
ENSG00000266714.9	1906.5	-1.59134	0.219098	-7.26317	3.78124e-13	1.61032e-10
ENSG00000162897.16	45.1776	-4.16099	0.573391	-7.25682	3.9631e-13	1.66404e-10
ENSG00000132702.13	13.5671	-2.71244	0.37389	-7.25463	4.02764e-13	1.66404e-10
ENSG00000147687.19	1520.89	1.10205	0.151914	7.25444	4.03342e-13	1.66404e-10
ENSG00000287356.1	142.232	-1.8217	0.251266	-7.25012	4.16411e-13	1.70025e-10
ENSG00000147160.9	15.0712	4.00682	0.55452	7.22574	4.98364e-13	2.0141e-10
ENSG00000120705.13	8124.03	0.629497	0.087361	7.20569	5.77491e-13	2.31031e-10
ENSG00000109758.9	21.9298	-2.82735	0.392474	-7.20392	5.85057e-13	2.31718e-10
ENSG00000132704.16	148.725	-3.48158	0.483428	-7.20186	5.93984e-13	2.32924e-10
ENSG00000166407.14	26.0557	3.46766	0.481653	7.1995	6.04322e-13	2.34655e-10
ENSG00000156234.7	3072.19	-3.41448	0.474405	-7.19738	6.13815e-13	2.36027e-10
ENSG00000251661.3	55.2303	-1.66761	0.231904	-7.19094	6.43461e-13	2.45047e-10
ENSG00000273183.1	24.6855	-1.15945	0.161396	-7.18393	6.77362e-13	2.55501e-10
ENSG00000199568.1	26.4972	5.37868	0.750231	7.16937	7.53458e-13	2.81523e-10
ENSG00000100721.11	271.013	-3.99875	0.55876	-7.15647	8.27794e-13	3.06408e-10
ENSG00000211611.2	212.673	-3.49592	0.488626	-7.1546	8.39177e-13	3.07745e-10
ENSG00000155100.11	986.539	1.03806	0.145165	7.15089	8.62157e-13	3.13271e-10
ENSG00000105122.13	793.177	-1.87952	0.263246	-7.13981	9.34612e-13	3.36511e-10
ENSG00000145920.15	142.539	5.48583	0.770009	7.12437	1.04559e-12	3.73078e-10
ENSG00000142920.17	538.86	-0.990598	0.139305	-7.11099	1.15216e-12	4.07432e-10
ENSG00000174437.17	16268.5	0.787047	0.110787	7.10416	1.21058e-12	4.24304e-10
ENSG00000272669.1	51.6785	-1.65829	0.233518	-7.10136	1.23537e-12	4.29194e-10
ENSG00000077279.19	180.625	-3.94815	0.557757	-7.07861	1.45603e-12	5.01455e-10
ENSG00000129636.13	3290.28	0.936678	0.132674	7.06	1.66502e-12	5.68489e-10
ENSG00000102879.16	3502.46	-2.04606	0.290253	-7.04922	1.79926e-12	6.09073e-10
ENSG00000269220.1	30.6944	-1.96943	0.279972	-7.03436	2.00171e-12	6.71863e-10
ENSG00000154174.8	7097.71	0.707142	0.100568	7.03146	2.04387e-12	6.80249e-10
ENSG00000241106.8	218.657	-2.38352	0.339736	-7.0158	2.28635e-12	7.54608e-10
ENSG00000131096.10	75.2934	-3.10356	0.442871	-7.00782	2.42058e-12	7.9231e-10
ENSG00000117322.18	641.49	-3.98975	0.570064	-6.99877	2.58216e-12	8.38269e-10
ENSG00000253998.3	163.28	-4.16595	0.595682	-6.99357	2.67974e-12	8.62878e-10
ENSG00000130595.19	36.1533	-2.3497	0.336061	-6.99188	2.71222e-12	8.66291e-10
ENSG00000104894.12	1602.56	-1.92199	0.274963	-6.99	2.74895e-12	8.70999e-10
ENSG00000262089.1	67.5364	-1.24835	0.178637	-6.98818	2.78474e-12	8.75336e-10
ENSG00000023902.14	2733.58	-1.2047	0.172586	-6.98029	2.94562e-12	9.18615e-10
ENSG00000225746.13	33.612	-3.22569	0.462619	-6.97266	3.10998e-12	9.62295e-10
ENSG00000145817.17	3222.81	0.652149	0.0936033	6.96716	3.23408e-12	9.92937e-10
ENSG00000272282.1	32.3991	-2.35261	0.337896	-6.96252	3.34246e-12	1.01832e-09
ENSG00000228037.1	15.41	-1.69137	0.243023	-6.95974	3.40907e-12	1.03068e-09
ENSG00000123329.20	585.662	-1.8224	0.26212	-6.95254	3.58778e-12	1.0765e-09
ENSG00000155428.12	7.28472	-2.3209	0.334134	-6.94601	3.75765e-12	1.11899e-09
ENSG00000110665.12	80.2076	-2.05199	0.295595	-6.9419	3.86867e-12	1.13861e-09
ENSG00000182873.5	98.3462	-1.1133	0.160385	-6.94145	3.88105e-12	1.13861e-09
ENSG00000235505.7	124.181	-1.50101	0.216358	-6.93764	3.98691e-12	1.16107e-09
ENSG00000225828.1	101.367	-1.3991	0.201877	-6.93048	4.19409e-12	1.21249e-09
ENSG00000159496.14	43.7194	-2.10332	0.304208	-6.91408	4.70918e-12	1.35153e-09
ENSG00000136021.19	4300.65	0.762942	0.110403	6.91051	4.82922e-12	1.37601e-09
ENSG00000167302.11	368.171	-0.873487	0.126624	-6.89828	5.26351e-12	1.48905e-09
ENSG00000167077.13	240.502	-1.8794	0.272683	-6.89227	5.49079e-12	1.54233e-09
ENSG00000188389.11	178.034	-2.4342	0.353301	-6.88987	5.58424e-12	1.55753e-09
ENSG00000196517.13	2111.12	1.78707	0.259494	6.88675	5.70832e-12	1.581e-09
ENSG00000122986.14	258.955	-1.61234	0.234187	-6.88483	5.78557e-12	1.58978e-09
ENSG00000188822.8	85.2611	-3.0433	0.442084	-6.88398	5.82028e-12	1.58978e-09
ENSG00000182685.7	107.679	-1.51424	0.220337	-6.87239	6.31345e-12	1.71267e-09
ENSG00000173699.16	7.45751	5.09528	0.742896	6.85868	6.95006e-12	1.87254e-09
ENSG00000114115.10	2514.1	-2.21356	0.323057	-6.85191	7.28719e-12	1.95011e-09
ENSG00000169032.10	2258.81	0.732322	0.106936	6.84822	7.47755e-12	1.98762e-09
ENSG00000155096.14	16246.2	0.984097	0.143841	6.84157	7.83306e-12	2.06824e-09
ENSG00000128340.15	2677.28	-1.73115	0.25309	-6.84003	7.91786e-12	2.07679e-09
ENSG00000275888.1	39.1247	-1.47093	0.215297	-6.83208	8.36934e-12	2.18076e-09
ENSG00000227232.5	54.5147	-1.72994	0.253297	-6.82971	8.50843e-12	2.20252e-09
ENSG00000120526.12	2194.17	1.09338	0.160352	6.81862	9.1916e-12	2.36391e-09
ENSG00000086967.10	20.4445	-2.24068	0.328741	-6.81594	9.36512e-12	2.393e-09
ENSG00000138768.15	6390.53	0.698223	0.102455	6.81491	9.43223e-12	2.3947e-09
ENSG00000172724.12	2030.69	-3.06946	0.450606	-6.81185	9.6352e-12	2.42854e-09
ENSG00000104131.13	4500.83	0.63426	0.0931221	6.81106	9.68815e-12	2.42854e-09
ENSG00000076928.18	4819.48	-1.05613	0.155098	-6.80942	9.79949e-12	2.441e-09
ENSG00000206527.10	5327.77	0.949457	0.139651	6.79878	1.05506e-11	2.61166e-09
ENSG00000145087.13	40.4916	3.27802	0.482596	6.79247	1.10233e-11	2.71172e-09
ENSG00000182379.10	521.539	2.54673	0.375099	6.78949	1.12533e-11	2.75122e-09
ENSG00000262246.6	503.631	-1.06682	0.157518	-6.7727	1.26403e-11	3.07136e-09
ENSG00000276136.1	36.3095	-1.66555	0.24607	-6.76861	1.30023e-11	3.13863e-09
ENSG00000174780.17	8768.57	0.66236	0.0978693	6.7678	1.30756e-11	3.13863e-09
ENSG00000174695.10	6306.93	0.702467	0.10389	6.76164	1.36441e-11	3.25535e-09
ENSG00000276863.1	6.53183	-2.49974	0.369837	-6.75904	1.38913e-11	3.29448e-09
ENSG00000144566.11	3576.51	0.577354	0.0855484	6.74886	1.49006e-11	3.50359e-09
ENSG00000277959.1	23.3617	-1.36432	0.20217	-6.74839	1.49499e-11	3.50359e-09
ENSG00000077147.16	16343	0.74026	0.109716	6.74703	1.509e-11	3.5156e-09
ENSG00000280332.1	132.775	-1.41063	0.209149	-6.74462	1.53429e-11	3.55363e-09
ENSG00000185245.8	105.655	-2.1233	0.314974	-6.74118	1.57101e-11	3.61752e-09
ENSG00000100522.10	1608.12	1.06714	0.158342	6.73946	1.58974e-11	3.6395e-09
ENSG00000274536.7	37.9566	-2.00125	0.297196	-6.73378	1.65306e-11	3.7627e-09
ENSG00000120756.13	861.272	1.2933	0.192506	6.71824	1.83931e-11	4.16002e-09
ENSG00000262580.5	232.155	-1.22243	0.181976	-6.71751	1.84862e-11	4.16002e-09
ENSG00000174788.10	172.851	-2.42003	0.361078	-6.70223	2.05261e-11	4.59298e-09
ENSG00000164951.16	2413.66	1.08504	0.161936	6.70042	2.07821e-11	4.62412e-09
ENSG00000227953.7	69.9766	-1.95779	0.292252	-6.69897	2.09901e-11	4.64432e-09
ENSG00000263069.6	193.11	-1.64045	0.245342	-6.68636	2.28785e-11	5.0123e-09
ENSG00000140157.15	2041.29	0.704491	0.105365	6.68619	2.29063e-11	5.0123e-09
ENSG00000108405.4	112.229	-1.98158	0.296452	-6.68431	2.32017e-11	5.04905e-09
ENSG00000172551.11	16595	4.12814	0.617868	6.68126	2.36889e-11	5.10836e-09
ENSG00000258875.6	52.1915	-1.39174	0.208331	-6.68043	2.38241e-11	5.10836e-09
ENSG00000238045.9	57.4827	-1.17787	0.176322	-6.6802	2.38612e-11	5.10836e-09
ENSG00000147592.9	565.48	1.10953	0.166225	6.67489	2.47411e-11	5.26825e-09
ENSG00000167196.14	2015.59	0.697032	0.104469	6.67212	2.52132e-11	5.34007e-09
ENSG00000182827.9	5286.18	0.772837	0.115911	6.66752	2.60162e-11	5.48083e-09
ENSG00000188613.7	415.95	1.83055	0.274814	6.66106	2.71853e-11	5.69682e-09
ENSG00000211751.9	914.512	-2.37289	0.356347	-6.65892	2.75855e-11	5.75027e-09
ENSG00000117009.12	523.922	2.1293	0.319921	6.65569	2.81965e-11	5.84686e-09
ENSG00000115850.10	71.8951	3.19454	0.480357	6.65033	2.92428e-11	6.03225e-09
ENSG00000112972.15	3520.13	1.11409	0.167603	6.6472	2.98722e-11	6.12534e-09
ENSG00000131116.12	591.167	-1.30319	0.19607	-6.64655	3.00035e-11	6.12534e-09
ENSG00000266088.6	86.5009	-2.20567	0.332038	-6.64281	3.07767e-11	6.25098e-09
ENSG00000165476.14	4329.92	1.02578	0.154466	6.6408	3.11979e-11	6.30421e-09
ENSG00000215788.11	485.566	-1.38546	0.20892	-6.63152	3.32249e-11	6.67609e-09
ENSG00000135596.18	2058.6	-1.04537	0.157653	-6.63085	3.33754e-11	6.67609e-09
ENSG00000172247.4	16.7455	-2.0952	0.316662	-6.61652	3.67748e-11	7.3191e-09
ENSG00000204475.10	54.7733	-2.46955	0.37347	-6.61244	3.78044e-11	7.4864e-09
ENSG00000060709.15	39.3595	2.67924	0.40551	6.60707	3.91989e-11	7.72394e-09
ENSG00000125910.6	186.106	-2.28779	0.346404	-6.6044	3.99142e-11	7.82594e-09
ENSG00000164244.21	6666.55	0.733225	0.111105	6.59937	4.12918e-11	8.05617e-09
ENSG00000110218.9	1294.69	0.762585	0.11565	6.59393	4.28325e-11	8.31581e-09
ENSG00000108091.11	8634.81	0.810815	0.123004	6.5918	4.34512e-11	8.39477e-09
ENSG00000136868.11	4224.63	0.873453	0.13268	6.58314	4.6063e-11	8.85618e-09
ENSG00000198286.10	532.161	-1.81041	0.275282	-6.57657	4.81422e-11	9.16893e-09
ENSG00000237513.2	32.9517	-1.83495	0.279015	-6.57654	4.81527e-11	9.16893e-09
ENSG00000127124.16	1626.98	-0.97493	0.14831	-6.5736	4.91145e-11	9.30732e-09
ENSG00000138964.17	693.972	-1.49726	0.227841	-6.57153	4.98012e-11	9.39251e-09
ENSG00000109971.14	70783	0.831612	0.126719	6.56263	5.28684e-11	9.92373e-09
ENSG00000173762.8	437.961	-2.14809	0.327452	-6.56002	5.38023e-11	1.00064e-08
ENSG00000136286.16	719.212	-1.59731	0.243493	-6.55998	5.38141e-11	1.00064e-08
ENSG00000121579.13	9298.2	0.689141	0.105158	6.55336	5.62562e-11	1.04116e-08
ENSG00000035720.8	139.265	-2.24827	0.343408	-6.54694	5.87294e-11	1.08188e-08
ENSG00000058335.16	290.174	2.4273	0.370816	6.54584	5.916e-11	1.08476e-08
ENSG00000224660.2	425.537	-1.0431	0.159378	-6.54477	5.95858e-11	1.08754e-08
ENSG00000167414.4	6.2659	-2.27117	0.347207	-6.54126	6.10015e-11	1.10104e-08
ENSG00000143434.16	663.039	-1.12872	0.172563	-6.54093	6.11373e-11	1.10104e-08
ENSG00000173531.15	293.77	-1.38534	0.211797	-6.54088	6.11597e-11	1.10104e-08
ENSG00000107959.17	4110	0.680373	0.104067	6.53784	6.24123e-11	1.11762e-08
ENSG00000211772.11	1463.61	-2.32661	0.35598	-6.53578	6.32802e-11	1.11762e-08
ENSG00000142046.15	147.537	-1.31957	0.201902	-6.53569	6.33172e-11	1.11762e-08
ENSG00000163331.12	65.3652	-3.04074	0.465252	-6.53569	6.33176e-11	1.11762e-08
ENSG00000186827.11	241.684	-1.63501	0.250181	-6.53528	6.34914e-11	1.11762e-08
ENSG00000084073.10	5725.17	0.693261	0.106122	6.53266	6.46139e-11	1.12845e-08
ENSG00000218891.5	609.241	-1.07652	0.164795	-6.53251	6.46769e-11	1.12845e-08
ENSG00000224430.2	14.2978	-3.10208	0.474923	-6.53175	6.50051e-11	1.12921e-08
ENSG00000219200.12	46.4567	-1.07686	0.165173	-6.51956	7.05157e-11	1.21958e-08
ENSG00000278743.1	16.2929	-1.73316	0.265868	-6.51888	7.08353e-11	1.21978e-08
ENSG00000185522.9	203.501	-1.61999	0.248835	-6.51029	7.50052e-11	1.286e-08
ENSG00000173114.13	128.696	-2.16462	0.332599	-6.50817	7.607e-11	1.29863e-08
ENSG00000169442.9	1272.85	-2.1396	0.328868	-6.50595	7.72019e-11	1.3123e-08
ENSG00000164961.16	6096.73	1.02654	0.157855	6.50307	7.86986e-11	1.33202e-08
ENSG00000167286.10	567.248	-2.30373	0.354584	-6.497	8.19359e-11	1.38092e-08
ENSG00000253973.3	98.4504	-2.96921	0.457252	-6.4936	8.38092e-11	1.4065e-08
ENSG00000261218.5	14.5941	-2.15338	0.331747	-6.49104	8.52454e-11	1.42457e-08
ENSG00000188878.19	375.154	-1.05558	0.162712	-6.48742	8.7318e-11	1.44955e-08
ENSG00000148824.19	184.526	-0.914004	0.140904	-6.48672	8.77229e-11	1.44955e-08
ENSG00000048392.12	3320.71	1.0512	0.162059	6.48653	8.78379e-11	1.44955e-08
ENSG00000182196.13	13.5152	-1.82149	0.280982	-6.4826	9.01563e-11	1.48163e-08
ENSG00000058453.17	1307.33	-1.22965	0.189713	-6.48164	9.07287e-11	1.48488e-08
ENSG00000169446.5	2033.39	0.721848	0.111418	6.47873	9.24959e-11	1.50757e-08
ENSG00000015285.11	747.492	-1.56004	0.24091	-6.47562	9.44245e-11	1.53269e-08
ENSG00000168546.11	75.1751	-2.27801	0.351839	-6.47457	9.50819e-11	1.53707e-08
ENSG00000086827.9	1413.85	0.719552	0.111163	6.47293	9.61227e-11	1.54757e-08
ENSG00000259436.1	26.4842	-2.01779	0.3121	-6.4652	1.01163e-10	1.62212e-08
ENSG00000232573.1	762.573	-1.75684	0.271944	-6.46031	1.04486e-10	1.66867e-08
ENSG00000211652.2	291.035	-2.89638	0.448427	-6.45898	1.05409e-10	1.67145e-08
ENSG00000198816.7	2036.98	-1.39007	0.21522	-6.45885	1.05505e-10	1.67145e-08
ENSG00000246922.9	243.462	-1.30624	0.202331	-6.45597	1.07528e-10	1.69672e-08
ENSG00000187862.12	21.7015	-2.58865	0.401103	-6.45382	1.09062e-10	1.7141e-08
ENSG00000152082.15	1630.85	-1.50034	0.232553	-6.45164	1.10648e-10	1.73215e-08
ENSG00000103035.11	1479.27	0.831432	0.128943	6.44806	1.13292e-10	1.76655e-08
ENSG00000213904.9	42.0483	-1.17532	0.182305	-6.44703	1.1406e-10	1.77156e-08
ENSG00000184260.6	66.794	-1.74331	0.270992	-6.43308	1.25044e-10	1.93456e-08
ENSG00000221978.12	5117.77	-0.872729	0.135815	-6.42589	1.31104e-10	2.02044e-08
ENSG00000069956.12	3259.69	0.898792	0.13992	6.42359	1.33093e-10	2.04314e-08
ENSG00000170881.5	4280.73	1.09749	0.170893	6.42209	1.34419e-10	2.05552e-08
ENSG00000152684.11	1238.98	0.617506	0.0962902	6.41297	1.4271e-10	2.16774e-08
ENSG00000275056.1	11.1907	-1.95852	0.305407	-6.41282	1.42852e-10	2.16774e-08
ENSG00000140795.13	52.0601	2.02542	0.31601	6.40935	1.46138e-10	2.20914e-08
ENSG00000104903.5	264.215	-1.51493	0.236534	-6.40471	1.50656e-10	2.26877e-08
ENSG00000165732.13	7780.94	0.935678	0.146114	6.40373	1.51625e-10	2.27472e-08
ENSG00000197582.5	27.5706	-2.10029	0.328029	-6.40276	1.52589e-10	2.28054e-08
ENSG00000103310.11	11.4308	4.80072	0.750203	6.39923	1.56163e-10	2.32519e-08
ENSG00000277744.1	29.8822	-1.38634	0.216712	-6.39713	1.58323e-10	2.34852e-08
ENSG00000101282.9	43.5121	-2.48495	0.388606	-6.39454	1.61032e-10	2.37979e-08
ENSG00000073969.18	3434.2	0.769498	0.120393	6.39157	1.64192e-10	2.41747e-08
ENSG00000288600.1	7.0307	-2.60045	0.406927	-6.39046	1.65392e-10	2.42611e-08
ENSG00000273824.1	5.57096	-2.61212	0.409096	-6.3851	1.71287e-10	2.50332e-08
ENSG00000164924.18	74281.1	0.936133	0.146681	6.38209	1.74691e-10	2.54368e-08
ENSG00000261448.1	4.68067	-2.83933	0.444986	-6.38071	1.76273e-10	2.55732e-08
ENSG00000259605.3	22.694	-1.91354	0.299946	-6.37963	1.77517e-10	2.56596e-08
ENSG00000174123.11	225.839	-2.339	0.36676	-6.37747	1.80034e-10	2.59289e-08
ENSG00000130487.9	1827.6	-2.62479	0.411871	-6.37284	1.85554e-10	2.6627e-08
ENSG00000139193.4	226.184	-1.95834	0.307536	-6.36783	1.91722e-10	2.72546e-08
ENSG00000196305.18	9562.1	0.750822	0.117911	6.36771	1.9187e-10	2.72546e-08
ENSG00000185294.7	2.83249	-4.01793	0.630994	-6.36761	1.91992e-10	2.72546e-08
ENSG00000067704.10	10949.1	0.753536	0.118356	6.3667	1.93138e-10	2.73194e-08
ENSG00000181577.16	75.5074	2.8842	0.453099	6.36551	1.94644e-10	2.74344e-08
ENSG00000277161.2	651.95	0.752306	0.11834	6.35713	2.05561e-10	2.88703e-08
ENSG00000171747.9	28.4912	-1.91589	0.301603	-6.35236	2.1203e-10	2.96736e-08
ENSG00000167895.15	1097.12	-1.85489	0.292148	-6.34915	2.16513e-10	3.01944e-08
ENSG00000177788.6	1050.88	1.21033	0.190688	6.34714	2.19361e-10	3.04843e-08
ENSG00000242779.7	426.591	1.35948	0.214288	6.34414	2.23669e-10	3.09743e-08
ENSG00000173432.12	2480.75	-2.70983	0.427284	-6.34199	2.26813e-10	3.13001e-08
ENSG00000119725.20	43.3737	-1.62999	0.257096	-6.34002	2.29738e-10	3.15938e-08
ENSG00000198948.12	977.494	1.48091	0.233793	6.33431	2.38405e-10	3.26722e-08
ENSG00000223349.1	5.77245	-5.32215	0.840463	-6.3324	2.41373e-10	3.28916e-08
ENSG00000259081.1	15.0403	-1.30891	0.206707	-6.33221	2.41667e-10	3.28916e-08
ENSG00000169660.17	1238.43	-1.15253	0.182212	-6.32523	2.52863e-10	3.42976e-08
ENSG00000166266.14	2184.57	0.686197	0.108506	6.32408	2.54752e-10	3.44358e-08
ENSG00000168615.13	8493.74	1.3366	0.211605	6.31646	2.67624e-10	3.60528e-08
ENSG00000117215.15	531.069	-2.8357	0.44913	-6.31377	2.72321e-10	3.65612e-08
ENSG00000151151.6	1083.22	1.11425	0.176562	6.31081	2.77573e-10	3.71404e-08
ENSG00000273759.1	59.0601	-1.1375	0.180292	-6.3092	2.8049e-10	3.74043e-08
ENSG00000108839.12	67.7092	-1.12834	0.179244	-6.29497	3.07461e-10	4.08635e-08
ENSG00000164830.18	3555.03	0.911293	0.144916	6.2884	3.20745e-10	4.24864e-08
ENSG00000204316.13	65.5558	-0.896828	0.142694	-6.28498	3.27888e-10	4.31609e-08
ENSG00000120451.11	5422.61	0.694805	0.110551	6.28492	3.28017e-10	4.31609e-08
ENSG00000113615.13	2902.21	0.853508	0.135935	6.27877	3.41254e-10	4.4754e-08
ENSG00000162572.21	284.754	-1.63062	0.259911	-6.27377	3.52401e-10	4.60634e-08
ENSG00000143851.15	763.557	-1.73762	0.277085	-6.27108	3.58546e-10	4.67124e-08
ENSG00000077984.6	452.082	-1.91558	0.30579	-6.26435	3.74381e-10	4.86155e-08
ENSG00000085719.13	12788.7	0.917425	0.146653	6.25574	3.95642e-10	5.12085e-08
ENSG00000126524.10	3824.27	0.625151	0.0999863	6.25237	4.04279e-10	5.21559e-08
ENSG00000111732.11	10.1456	-3.27526	0.524428	-6.24538	4.22761e-10	5.43632e-08
ENSG00000164754.15	27880.1	1.04569	0.167583	6.23982	4.38072e-10	5.60431e-08
ENSG00000105374.10	620.057	-2.19749	0.352183	-6.23961	4.38654e-10	5.60431e-08
ENSG00000281538.1	16.8425	-1.22303	0.196054	-6.23823	4.42551e-10	5.63591e-08
ENSG00000161217.12	3654.34	0.476903	0.0764582	6.23743	4.44812e-10	5.64655e-08
ENSG00000255760.2	23.3657	-2.14198	0.343678	-6.23251	4.59019e-10	5.80827e-08
ENSG00000220201.7	41.4541	-1.37754	0.221334	-6.22382	4.85187e-10	6.11985e-08
ENSG00000147669.11	4222.98	0.952525	0.153063	6.2231	4.87422e-10	6.12852e-08
ENSG00000266970.1	65.9069	-1.9463	0.31303	-6.21764	5.04698e-10	6.31077e-08
ENSG00000137285.10	195.265	-1.89812	0.305286	-6.21751	5.05104e-10	6.31077e-08
ENSG00000256705.3	4.83475	-2.08972	0.3366	-6.20831	5.35577e-10	6.67046e-08
ENSG00000198064.13	9.66656	-1.76541	0.284386	-6.20778	5.37376e-10	6.67188e-08
ENSG00000173295.7	208.777	-1.22526	0.197784	-6.19494	5.83087e-10	7.21679e-08
ENSG00000148935.11	74.93	-1.52564	0.246423	-6.19112	5.97365e-10	7.37048e-08
ENSG00000215199.3	14.554	1.16786	0.188677	6.1897	6.02786e-10	7.41427e-08
ENSG00000253738.2	1684.63	0.761974	0.123118	6.18897	6.05582e-10	7.4256e-08
ENSG00000185669.6	77.1506	-1.44184	0.233056	-6.18666	6.1451e-10	7.49829e-08
ENSG00000288033.1	8.41366	-1.56657	0.253225	-6.18646	6.15297e-10	7.49829e-08
ENSG00000277301.1	13.9854	-1.77917	0.28812	-6.1751	6.61216e-10	8.02295e-08
ENSG00000239402.3	31.6686	-5.13934	0.832307	-6.17482	6.62401e-10	8.02295e-08
ENSG00000100916.14	426.023	0.621684	0.100716	6.17263	6.7163e-10	8.10815e-08
ENSG00000135437.10	22.8895	-1.41719	0.22961	-6.17218	6.7353e-10	8.10815e-08
ENSG00000250318.1	58.1722	-1.01712	0.164841	-6.17031	6.8158e-10	8.1802e-08
ENSG00000025796.14	8348.71	0.718419	0.116454	6.16912	6.86704e-10	8.21679e-08
ENSG00000225523.2	47.6991	-3.41379	0.553851	-6.16373	7.10505e-10	8.47598e-08
ENSG00000171557.17	83.9835	4.85358	0.787718	6.16157	7.20276e-10	8.56401e-08
ENSG00000166986.15	5846.69	0.597723	0.0970149	6.16114	7.22209e-10	8.56401e-08
ENSG00000132522.16	17.2904	-1.08031	0.175451	-6.15736	7.39666e-10	8.74484e-08
ENSG00000167711.14	319.819	-1.91725	0.311407	-6.15675	7.42543e-10	8.75272e-08
ENSG00000126353.3	671.72	-2.17327	0.353058	-6.15556	7.48144e-10	8.79258e-08
ENSG00000196843.17	1926.65	-1.27624	0.207443	-6.15223	7.64006e-10	8.94354e-08
ENSG00000265933.5	27.4733	5.13132	0.834101	6.15192	7.65505e-10	8.94354e-08
ENSG00000138095.19	13453.7	0.704899	0.114609	6.15045	7.72631e-10	9.00024e-08
ENSG00000023228.14	5803.1	0.641481	0.10431	6.14978	7.75881e-10	9.0116e-08
ENSG00000180539.8	49.2107	-1.23039	0.200129	-6.14797	7.84801e-10	9.08855e-08
ENSG00000086548.9	11876.7	3.21376	0.522812	6.14706	7.89312e-10	9.11414e-08
ENSG00000184575.12	8091.22	0.843959	0.137322	6.14586	7.95334e-10	9.15698e-08
ENSG00000167080.9	390.016	3.22547	0.524935	6.14451	8.02115e-10	9.19742e-08
ENSG00000160856.21	278.106	-2.63148	0.428285	-6.14424	8.03491e-10	9.19742e-08
ENSG00000134001.15	4732.02	0.542025	0.0882763	6.1401	8.2472e-10	9.41321e-08
ENSG00000242534.2	22.0859	-2.74187	0.446865	-6.13579	8.47357e-10	9.6438e-08
ENSG00000175305.17	467.408	1.37573	0.224259	6.13456	8.53942e-10	9.69089e-08
ENSG00000225972.1	1330.45	-3.67878	0.600023	-6.13107	8.729e-10	9.87774e-08
ENSG00000263787.1	4.42013	-2.76533	0.45124	-6.12828	8.88353e-10	1.00072e-07
ENSG00000138069.18	10329.3	0.536332	0.0875203	6.12809	8.89393e-10	1.00072e-07
ENSG00000167984.18	482.955	-1.27992	0.20889	-6.12723	8.94242e-10	1.00332e-07
ENSG00000178809.11	7.50475	-1.91758	0.312994	-6.12657	8.9791e-10	1.00459e-07
ENSG00000213585.11	13317.5	0.743418	0.121481	6.11963	9.37914e-10	1.04639e-07
ENSG00000126214.21	1018.09	-0.793746	0.129746	-6.11768	9.49488e-10	1.05633e-07
ENSG00000266554.2	23.0118	3.80837	0.622909	6.11385	9.72551e-10	1.07896e-07
ENSG00000249550.7	21.934	3.273	0.535445	6.11268	9.79733e-10	1.08389e-07
ENSG00000161270.20	55.3951	-2.85287	0.466753	-6.11216	9.82906e-10	1.08437e-07
ENSG00000162851.8	1510.42	0.712549	0.116657	6.10807	1.00843e-09	1.10944e-07
ENSG00000157538.14	2902.3	0.559206	0.0916613	6.10078	1.05552e-09	1.15803e-07
ENSG00000164344.16	24.3758	-1.65933	0.272019	-6.10004	1.06041e-09	1.16018e-07
ENSG00000166575.17	2506.03	1.02705	0.168495	6.09547	1.09118e-09	1.19056e-07
ENSG00000139514.13	3966.8	1.0563	0.173315	6.0947	1.09644e-09	1.19302e-07
ENSG00000287262.1	468.371	-2.32643	0.381854	-6.09245	1.11192e-09	1.20654e-07
ENSG00000218052.5	20.8068	-2.02645	0.332734	-6.09031	1.12694e-09	1.21655e-07
ENSG00000226179.6	45.7128	-1.35262	0.222095	-6.09026	1.12728e-09	1.21655e-07
ENSG00000264589.4	98.5915	-2.75385	0.452371	-6.0876	1.14619e-09	1.23359e-07
ENSG00000113013.16	20978.1	0.734008	0.120662	6.08318	1.17825e-09	1.26466e-07
ENSG00000115616.3	406.296	2.50302	0.411842	6.07763	1.21974e-09	1.30565e-07
ENSG00000269352.1	70.3578	-0.976033	0.160676	-6.07456	1.2433e-09	1.32559e-07
ENSG00000198087.7	5504.5	0.785505	0.129316	6.07433	1.24506e-09	1.32559e-07
ENSG00000268938.2	5.37774	-1.67851	0.276365	-6.07352	1.2514e-09	1.32876e-07
ENSG00000120049.20	117.478	-1.45838	0.240182	-6.07195	1.26366e-09	1.3382e-07
ENSG00000095203.14	1749.9	1.13882	0.187587	6.07088	1.2721e-09	1.34354e-07
ENSG00000067167.8	14719.3	0.791397	0.130415	6.06831	1.29262e-09	1.36158e-07
ENSG00000276718.1	30.9746	-1.12603	0.185574	-6.06781	1.29666e-09	1.36222e-07
ENSG00000272501.1	87.4543	-1.0487	0.172906	-6.06517	1.31816e-09	1.38114e-07
ENSG00000138757.15	9395.02	0.654266	0.107893	6.06401	1.32768e-09	1.38745e-07
ENSG00000180448.10	2311.61	-1.34308	0.22153	-6.06273	1.33829e-09	1.39278e-07
ENSG00000274265.5	197.881	-1.77459	0.292719	-6.06245	1.34064e-09	1.39278e-07
ENSG00000155511.18	21.9465	-2.7066	0.446477	-6.06213	1.34334e-09	1.39278e-07
ENSG00000114353.17	15649.2	-0.623377	0.102863	-6.06024	1.35914e-09	1.39751e-07
ENSG00000156689.7	1300.96	2.86133	0.472153	6.06018	1.35971e-09	1.39751e-07
ENSG00000133657.16	6858.85	0.807425	0.133236	6.0601	1.36039e-09	1.39751e-07
ENSG00000245954.8	36.8996	-2.2841	0.37692	-6.05991	1.36201e-09	1.39751e-07
ENSG00000086598.11	22772.4	0.653986	0.107945	6.05848	1.3741e-09	1.40627e-07
ENSG00000173486.14	9.61236	-1.26481	0.208822	-6.0569	1.38768e-09	1.41528e-07
ENSG00000163428.4	4163.09	0.767234	0.126677	6.05663	1.39005e-09	1.41528e-07
ENSG00000130522.6	8271.67	-0.98577	0.162779	-6.05588	1.39651e-09	1.41821e-07
ENSG00000151117.9	1583.24	1.5815	0.261474	6.04839	1.46303e-09	1.48196e-07
ENSG00000198431.16	5954.78	0.903701	0.14946	6.04645	1.48072e-09	1.49605e-07
ENSG00000185787.15	11833	0.539371	0.0892556	6.043	1.51277e-09	1.52455e-07
ENSG00000122133.17	16.0018	2.79584	0.462728	6.04208	1.52141e-09	1.52936e-07
ENSG00000146556.14	167.01	-1.01206	0.167518	-6.04151	1.52682e-09	1.53092e-07
ENSG00000186326.4	27.7308	1.79947	0.298233	6.03377	1.6018e-09	1.60204e-07
ENSG00000205090.9	30.7448	-1.29052	0.214	-6.03046	1.63497e-09	1.6311e-07
ENSG00000158062.20	1501.17	-1.08276	0.17957	-6.02972	1.64245e-09	1.63444e-07
ENSG00000180089.6	68.0394	-1.22131	0.202647	-6.02678	1.67258e-09	1.66025e-07
ENSG00000075826.17	359.015	-1.19261	0.197906	-6.02616	1.679e-09	1.66246e-07
ENSG00000284773.1	47.0702	-1.22831	0.203883	-6.02455	1.69579e-09	1.6749e-07
ENSG00000154975.14	14.0515	5.21982	0.866906	6.02121	1.73121e-09	1.70563e-07
ENSG00000099194.6	54308.9	1.82661	0.303562	6.01725	1.77405e-09	1.7435e-07
ENSG00000240253.6	73.9764	-4.03156	0.670234	-6.01515	1.7972e-09	1.76188e-07
ENSG00000135776.5	1518.78	0.67574	0.112373	6.01337	1.81711e-09	1.777e-07
ENSG00000175766.13	34.7616	4.31648	0.717907	6.01259	1.82583e-09	1.78113e-07
ENSG00000156642.17	6932.28	0.71743	0.119344	6.01147	1.83852e-09	1.7891e-07
ENSG00000121380.12	125.612	-1.96185	0.326556	-6.00769	1.88187e-09	1.8268e-07
ENSG00000100092.24	356.071	-1.29383	0.21543	-6.00579	1.90406e-09	1.84382e-07
ENSG00000064313.12	3538.48	0.999899	0.166524	6.00454	1.91879e-09	1.85355e-07
ENSG00000168878.19	14.2946	-2.04451	0.340644	-6.0019	1.9502e-09	1.87931e-07
ENSG00000226396.1	53.2366	-1.15827	0.193104	-5.99818	1.99536e-09	1.91561e-07
ENSG00000229127.2	50.6062	-1.57747	0.263	-5.99801	1.99754e-09	1.91561e-07
ENSG00000100288.20	23.7379	-1.31182	0.218856	-5.99398	2.04768e-09	1.9571e-07
ENSG00000173200.13	203.257	-1.75574	0.29293	-5.99374	2.0507e-09	1.9571e-07
ENSG00000266173.7	290.559	-1.26824	0.211651	-5.99214	2.07098e-09	1.97171e-07
ENSG00000227234.2	20.4419	-4.80912	0.802854	-5.99003	2.09796e-09	1.99261e-07
ENSG00000272836.1	30.6953	-1.05827	0.176759	-5.98707	2.13655e-09	2.02441e-07
ENSG00000261083.3	27.0123	-2.51137	0.419587	-5.98535	2.15919e-09	2.03634e-07
ENSG00000213445.10	2344.11	-1.08159	0.180713	-5.98512	2.16233e-09	2.03634e-07
ENSG00000051382.9	3264.37	0.67071	0.112066	5.98495	2.16457e-09	2.03634e-07
ENSG00000147168.13	759.249	-2.01595	0.336875	-5.98428	2.17354e-09	2.038e-07
ENSG00000122068.13	5288.33	0.629229	0.105157	5.98371	2.18116e-09	2.038e-07
ENSG00000285554.1	3.94658	-1.77418	0.296504	-5.98366	2.18177e-09	2.038e-07
ENSG00000205426.10	2870.73	3.24587	0.542705	5.98092	2.21881e-09	2.06773e-07
ENSG00000130592.17	2421.25	-1.32699	0.221907	-5.97996	2.23198e-09	2.07511e-07
ENSG00000236773.1	8.50174	1.32503	0.221598	5.97943	2.23918e-09	2.07693e-07
ENSG00000134910.14	11311.7	0.685027	0.114671	5.97387	2.31695e-09	2.14213e-07
ENSG00000131015.5	74.4639	1.8243	0.305392	5.97363	2.32029e-09	2.14213e-07
ENSG00000198885.10	107.209	-1.44437	0.241858	-5.97197	2.34409e-09	2.15907e-07
ENSG00000126264.10	48.3279	-1.73858	0.291176	-5.97091	2.35936e-09	2.16666e-07
ENSG00000188282.12	79.824	-1.96392	0.32893	-5.97064	2.36327e-09	2.16666e-07
ENSG00000091483.7	5229.96	0.791561	0.132592	5.96988	2.37422e-09	2.17167e-07
ENSG00000255733.6	29.5439	-2.62721	0.440118	-5.96933	2.38229e-09	2.17403e-07
ENSG00000245164.8	209.057	-2.3424	0.392524	-5.96754	2.40851e-09	2.19291e-07
ENSG00000271259.1	12.4586	-1.69395	0.283885	-5.96701	2.41635e-09	2.195e-07
ENSG00000111261.14	3053.96	1.07612	0.180586	5.95905	2.53703e-09	2.29935e-07
ENSG00000170248.15	10501.5	0.56232	0.0943817	5.95794	2.55437e-09	2.30836e-07
ENSG00000205702.11	44.9806	-1.27178	0.213469	-5.95767	2.55863e-09	2.30836e-07
ENSG00000170049.9	68.936	-1.21967	0.20478	-5.956	2.58493e-09	2.32679e-07
ENSG00000104859.15	1739.99	-0.8589	0.14423	-5.95505	2.59986e-09	2.33492e-07
ENSG00000177989.13	1327.26	-1.52938	0.25688	-5.9537	2.62154e-09	2.34906e-07
ENSG00000125304.10	16829.2	0.719297	0.120845	5.95224	2.64492e-09	2.36467e-07
ENSG00000275936.1	6.29323	-1.8072	0.303808	-5.94848	2.70641e-09	2.40895e-07
ENSG00000164823.11	3476.6	0.91277	0.153446	5.94847	2.70661e-09	2.40895e-07
ENSG00000112486.17	8.05055	-2.6972	0.453744	-5.94432	2.77602e-09	2.45941e-07
ENSG00000140538.16	283.251	-2.04154	0.343455	-5.94414	2.77911e-09	2.45941e-07
ENSG00000225885.7	13.4345	-1.86975	0.314563	-5.94397	2.78195e-09	2.45941e-07
ENSG00000214140.11	32.7464	-1.26989	0.213738	-5.94135	2.82687e-09	2.49357e-07
ENSG00000255031.5	44.5816	-1.58516	0.266855	-5.94016	2.8475e-09	2.50618e-07
ENSG00000225756.1	66.5028	-1.62033	0.272936	-5.93665	2.90898e-09	2.55461e-07
ENSG00000198106.8	10.9191	-2.05398	0.346083	-5.93493	2.9397e-09	2.57588e-07
ENSG00000126215.14	636.035	-0.796497	0.134225	-5.93405	2.95559e-09	2.58409e-07
ENSG00000147654.15	2048.79	0.856749	0.144429	5.93197	2.9932e-09	2.60073e-07
ENSG00000235790.7	16.5548	-1.48683	0.25065	-5.9319	2.99453e-09	2.60073e-07
ENSG00000099949.21	830.523	-0.855125	0.144163	-5.93167	2.99868e-09	2.60073e-07
ENSG00000170835.16	156.229	2.15911	0.364008	5.93149	3.002e-09	2.60073e-07
ENSG00000143127.13	221.463	-1.29052	0.217582	-5.93119	3.00746e-09	2.60073e-07
ENSG00000164983.7	2348.58	0.993498	0.167548	5.92964	3.03607e-09	2.60289e-07
ENSG00000260563.3	183.121	-0.991357	0.167191	-5.92949	3.03874e-09	2.60289e-07
ENSG00000268836.1	33.9457	-1.43446	0.241926	-5.92935	3.0414e-09	2.60289e-07
ENSG00000138760.10	18058.8	0.700716	0.118178	5.92932	3.04201e-09	2.60289e-07
ENSG00000205560.13	28.7437	-1.35574	0.228653	-5.92927	3.04282e-09	2.60289e-07
ENSG00000149218.5	3509.77	1.05791	0.178464	5.92788	3.06862e-09	2.6193e-07
ENSG00000130755.13	906.359	-1.4154	0.238855	-5.92575	3.10867e-09	2.64778e-07
ENSG00000102580.15	6286.33	0.732496	0.123715	5.92084	3.20301e-09	2.72229e-07
ENSG00000082213.18	2102.89	0.700694	0.118447	5.91569	3.30481e-09	2.80279e-07
ENSG00000185728.17	5989.43	0.709709	0.120082	5.91019	3.41712e-09	2.89185e-07
ENSG00000279716.1	69.015	-1.19114	0.201607	-5.90825	3.45761e-09	2.91987e-07
ENSG00000100429.18	39.3893	-1.13164	0.191579	-5.90692	3.48553e-09	2.93719e-07
ENSG00000127074.15	47.037	-1.89891	0.321542	-5.90563	3.513e-09	2.95405e-07
ENSG00000198932.13	396.315	-1.44266	0.244371	-5.90356	3.55737e-09	2.98502e-07
ENSG00000169562.13	383.302	3.02842	0.513415	5.89859	3.6663e-09	3.06992e-07
ENSG00000066855.16	2568.88	0.968644	0.164265	5.89684	3.70534e-09	3.09607e-07
ENSG00000278196.3	809.815	-2.47388	0.419589	-5.89596	3.72508e-09	3.10601e-07
ENSG00000123405.14	90.6943	-2.07942	0.352711	-5.89554	3.73463e-09	3.10615e-07
ENSG00000270195.2	23.1607	-1.3548	0.229812	-5.89526	3.74094e-09	3.10615e-07
ENSG00000147010.18	2223.35	-0.955942	0.162169	-5.89471	3.75335e-09	3.10994e-07
ENSG00000249007.1	51.7481	-2.03866	0.345948	-5.89298	3.793e-09	3.13293e-07
ENSG00000108064.11	3157.3	0.664066	0.112691	5.89281	3.79692e-09	3.13293e-07
ENSG00000279077.1	6.59883	-2.21387	0.376054	-5.88712	3.9299e-09	3.23405e-07
ENSG00000272733.1	16.6337	-1.45041	0.246381	-5.88687	3.93579e-09	3.23405e-07
ENSG00000225783.8	469.977	-1.57295	0.267433	-5.88166	4.06174e-09	3.33062e-07
ENSG00000168702.18	506.664	-3.22421	0.548614	-5.87701	4.17734e-09	3.41835e-07
ENSG00000178623.12	100.73	-1.01081	0.17203	-5.87575	4.20928e-09	3.43738e-07
ENSG00000058729.11	1507.34	0.575576	0.097971	5.87496	4.22939e-09	3.44669e-07
ENSG00000008405.12	1414.34	0.563462	0.0959466	5.87266	4.28862e-09	3.48779e-07
ENSG00000168621.15	20.0119	2.31735	0.394694	5.87125	4.32531e-09	3.51042e-07
ENSG00000004864.14	1819.82	0.772338	0.131562	5.87051	4.34458e-09	3.51884e-07
ENSG00000137710.17	3436.92	0.882139	0.150366	5.86661	4.44782e-09	3.59511e-07
ENSG00000184922.14	1404.01	-1.19651	0.20418	-5.86008	4.6265e-09	3.73097e-07
ENSG00000263874.2	106.429	-1.45069	0.247568	-5.85978	4.63475e-09	3.73097e-07
ENSG00000005175.10	2125.2	0.500792	0.0854889	5.85797	4.68559e-09	3.76425e-07
ENSG00000241014.2	16.2758	-1.24233	0.212097	-5.85737	4.70254e-09	3.77022e-07
ENSG00000122224.18	258.674	-2.00772	0.342792	-5.85696	4.71421e-09	3.77194e-07
ENSG00000130997.16	76.3512	-1.43096	0.244365	-5.85582	4.74673e-09	3.7903e-07
ENSG00000135245.10	1786.49	1.02439	0.174957	5.85512	4.76675e-09	3.79863e-07
ENSG00000172478.18	1749.83	3.14825	0.537845	5.85345	4.81492e-09	3.82807e-07
ENSG00000196329.11	53.1167	-1.76991	0.302385	-5.85317	4.82303e-09	3.82807e-07
ENSG00000172349.17	1111.01	-1.42135	0.243026	-5.84854	4.95896e-09	3.92809e-07
ENSG00000139116.19	1980.81	1.08605	0.185716	5.84791	4.97778e-09	3.93513e-07
ENSG00000233355.7	21.1433	-2.3173	0.396457	-5.84502	5.06507e-09	3.99616e-07
ENSG00000163795.14	784.664	-0.788921	0.134989	-5.84431	5.08662e-09	4.00518e-07
ENSG00000023839.12	280.422	2.27754	0.389878	5.84166	5.16838e-09	4.06148e-07
ENSG00000179111.9	7.09066	-2.0646	0.353463	-5.84107	5.18676e-09	4.06786e-07
ENSG00000205593.12	642.631	-0.918526	0.157273	-5.84034	5.20959e-09	4.07769e-07
ENSG00000107897.20	3009.78	0.815661	0.13968	5.83951	5.23549e-09	4.08987e-07
ENSG00000168010.11	1231.35	-1.01311	0.173536	-5.83802	5.28261e-09	4.11189e-07
ENSG00000184178.16	1142.67	0.573187	0.0981827	5.83796	5.28443e-09	4.11189e-07
ENSG00000201998.1	17.6074	-3.34091	0.572363	-5.83705	5.31336e-09	4.12629e-07
ENSG00000185986.12	556.621	-0.90541	0.155212	-5.83338	5.43171e-09	4.20995e-07
ENSG00000278107.1	34.9388	-1.24894	0.214119	-5.83293	5.44637e-09	4.21307e-07
ENSG00000247774.7	374.523	-1.64947	0.282826	-5.83212	5.47279e-09	4.22075e-07
ENSG00000256262.1	12.0448	-1.57173	0.269503	-5.83197	5.47762e-09	4.22075e-07
ENSG00000072274.13	11150.1	1.29757	0.222558	5.83026	5.53417e-09	4.25604e-07
ENSG00000179295.18	8075.22	0.669934	0.114974	5.82685	5.64829e-09	4.32832e-07
ENSG00000142319.18	18.8252	2.6507	0.454953	5.82631	5.6665e-09	4.32832e-07
ENSG00000165953.10	52.4577	-2.94081	0.504749	-5.82627	5.66798e-09	4.32832e-07
ENSG00000275024.1	6.60269	-1.81471	0.311476	-5.82616	5.67186e-09	4.32832e-07
ENSG00000102174.9	311.586	1.66687	0.286274	5.82264	5.79255e-09	4.41192e-07
ENSG00000113088.6	164.549	-2.20284	0.378407	-5.82135	5.83753e-09	4.43127e-07
ENSG00000166676.17	61.3457	-1.18384	0.203364	-5.82127	5.84034e-09	4.43127e-07
ENSG00000158636.16	2097.54	0.955061	0.164089	5.82039	5.87113e-09	4.44612e-07
ENSG00000162894.12	1092.87	-1.63967	0.281743	-5.81974	5.89405e-09	4.45495e-07
ENSG00000090554.13	9.01417	-1.49628	0.257171	-5.81823	5.94741e-09	4.48673e-07
ENSG00000198301.12	3158.36	0.491921	0.0845693	5.81679	5.99897e-09	4.51702e-07
ENSG00000165923.16	112.55	-1.25062	0.215035	-5.8159	6.03098e-09	4.53251e-07
ENSG00000167664.8	20.7588	-2.05397	0.35323	-5.81484	6.06936e-09	4.55271e-07
ENSG00000119912.18	3726.61	0.719338	0.123743	5.81316	6.13039e-09	4.58979e-07
ENSG00000274272.1	12.3795	-1.50514	0.259003	-5.81129	6.19946e-09	4.63275e-07
ENSG00000238260.1	17.1972	-1.28967	0.222135	-5.80581	6.40556e-09	4.77286e-07
ENSG00000187048.13	11.4231	-2.35644	0.405886	-5.80567	6.41105e-09	4.77286e-07
ENSG00000214185.3	9.26629	1.31961	0.227436	5.80215	6.54714e-09	4.86503e-07
ENSG00000100024.15	18.8452	-1.53128	0.263953	-5.80134	6.5787e-09	4.87933e-07
ENSG00000136758.19	11484.2	0.580685	0.100119	5.79997	6.63263e-09	4.90995e-07
ENSG00000182866.17	792.269	-1.94918	0.336086	-5.79966	6.64478e-09	4.90995e-07
ENSG00000013503.10	879.186	0.656556	0.11322	5.79895	6.67295e-09	4.92158e-07
ENSG00000104852.15	9012.12	-0.815995	0.140833	-5.79405	6.87084e-09	5.05812e-07
ENSG00000110958.16	19786.7	0.600817	0.103711	5.79319	6.90631e-09	5.07479e-07
ENSG00000277734.8	2282.92	-1.78483	0.308109	-5.79287	6.91951e-09	5.07508e-07
ENSG00000143753.13	6334.25	1.08861	0.188096	5.78751	7.14383e-09	5.22991e-07
ENSG00000213145.10	172.704	-1.5879	0.274606	-5.78245	7.36207e-09	5.37974e-07
ENSG00000070159.14	2229.14	0.774534	0.134013	5.77956	7.48964e-09	5.46288e-07
ENSG00000187531.14	1359.92	-0.811661	0.14047	-5.7782	7.55047e-09	5.49713e-07
ENSG00000188599.17	145.195	-0.8975	0.155373	-5.7764	7.63136e-09	5.54518e-07
ENSG00000172543.8	391.72	-1.90643	0.330054	-5.77612	7.64447e-09	5.54518e-07
ENSG00000238164.6	171.743	-1.47437	0.255458	-5.77147	7.85839e-09	5.68993e-07
ENSG00000249087.7	97.0322	-0.870272	0.150801	-5.77101	7.87994e-09	5.69512e-07
ENSG00000122126.17	3749.55	0.634512	0.109955	5.77066	7.89601e-09	5.69634e-07
ENSG00000232177.1	21.8019	-2.46021	0.426565	-5.76749	8.04602e-09	5.79401e-07
ENSG00000069493.15	909.894	-1.24276	0.215539	-5.76583	8.12549e-09	5.84062e-07
ENSG00000213199.8	157.536	-1.45764	0.252897	-5.76378	8.22503e-09	5.90146e-07
ENSG00000117245.13	73.9346	-0.966205	0.167794	-5.75827	8.49793e-09	6.08624e-07
ENSG00000236017.8	83.644	-1.25966	0.218805	-5.757	8.56228e-09	6.12125e-07
ENSG00000013725.14	804.639	-1.81298	0.315189	-5.75204	8.81729e-09	6.29221e-07
ENSG00000176531.10	843.84	-0.946773	0.164609	-5.75165	8.83765e-09	6.2954e-07
ENSG00000188404.10	1549.29	-1.94322	0.33803	-5.74866	8.99539e-09	6.39626e-07
ENSG00000187446.12	7603.34	0.632297	0.109997	5.74829	9.01487e-09	6.39862e-07
ENSG00000138834.14	2645.54	-0.879138	0.152979	-5.74679	9.09532e-09	6.44417e-07
ENSG00000279140.1	8.25216	-1.80189	0.313594	-5.74594	9.14121e-09	6.464e-07
ENSG00000213999.17	5.58474	-1.46001	0.254107	-5.74563	9.1577e-09	6.464e-07
ENSG00000114302.16	4694.78	0.726415	0.126435	5.74537	9.17227e-09	6.464e-07
ENSG00000164284.15	1345.23	0.532239	0.0926704	5.74335	9.28206e-09	6.52976e-07
ENSG00000217643.1	9.09344	-1.87992	0.32739	-5.74214	9.34898e-09	6.56517e-07
ENSG00000106948.17	2290.67	-1.16819	0.203566	-5.73865	9.54349e-09	6.6899e-07
ENSG00000197530.12	1109	-1.03339	0.180115	-5.73742	9.61311e-09	6.7268e-07
ENSG00000122025.15	368.23	-1.9081	0.332726	-5.73477	9.76448e-09	6.82067e-07
ENSG00000075089.9	1883.91	0.647765	0.112969	5.73399	9.80924e-09	6.83987e-07
ENSG00000198851.10	1469.03	-2.02784	0.353709	-5.73308	9.86241e-09	6.86217e-07
ENSG00000163687.14	68.6185	-2.00437	0.349628	-5.73285	9.87588e-09	6.86217e-07
ENSG00000101310.17	6668.28	0.737466	0.128697	5.73024	1.00291e-08	6.95645e-07
ENSG00000143512.13	160.731	2.29768	0.400995	5.72993	1.00472e-08	6.95681e-07
ENSG00000145649.8	497.085	-1.91616	0.334462	-5.72909	1.00974e-08	6.97935e-07
ENSG00000159131.17	4948.37	0.66449	0.116003	5.72823	1.01485e-08	6.99395e-07
ENSG00000261471.1	7.05594	-2.80819	0.490244	-5.72814	1.01538e-08	6.99395e-07
ENSG00000273188.1	29.6822	-1.07646	0.187942	-5.72759	1.01865e-08	7.00425e-07
ENSG00000061794.13	4808.26	0.755114	0.131877	5.72591	1.0288e-08	7.0618e-07
ENSG00000256271.1	7.80884	-2.02823	0.354305	-5.72452	1.03729e-08	7.10774e-07
ENSG00000178199.14	180.732	-1.62941	0.284732	-5.72261	1.04902e-08	7.17576e-07
ENSG00000271964.1	22.2358	-1.47973	0.258695	-5.71999	1.06528e-08	7.27442e-07
ENSG00000232912.6	13.0936	-1.88573	0.329727	-5.71908	1.07099e-08	7.29926e-07
ENSG00000183665.5	1612.91	0.955789	0.167139	5.71854	1.07442e-08	7.29926e-07
ENSG00000186810.8	372.856	-1.99929	0.349615	-5.71854	1.07445e-08	7.29926e-07
ENSG00000266378.1	8.46324	-2.65692	0.464661	-5.71796	1.07809e-08	7.31142e-07
ENSG00000144488.15	57.5248	-2.10394	0.368123	-5.71531	1.09501e-08	7.40892e-07
ENSG00000137492.8	3504.46	1.02031	0.178527	5.71513	1.0962e-08	7.40892e-07
ENSG00000167549.18	693.24	-2.61415	0.457458	-5.71451	1.10024e-08	7.4132e-07
ENSG00000232004.1	21.4657	1.42033	0.248551	5.71445	1.10058e-08	7.4132e-07
ENSG00000108669.16	3471.85	-0.668355	0.116975	-5.71365	1.10581e-08	7.43581e-07
ENSG00000119318.13	14718.6	0.595422	0.104251	5.71143	1.12032e-08	7.52055e-07
ENSG00000004534.15	4427.66	-0.610327	0.106872	-5.71084	1.12423e-08	7.53404e-07
ENSG00000008128.23	60.6583	-1.07785	0.188751	-5.71042	1.127e-08	7.53988e-07
ENSG00000142233.14	35.3157	-1.66348	0.29138	-5.70897	1.13659e-08	7.58689e-07
ENSG00000077274.9	356.085	-2.68039	0.469521	-5.70878	1.13786e-08	7.58689e-07
ENSG00000168827.15	4207.31	0.565429	0.0990596	5.70797	1.14333e-08	7.61055e-07
ENSG00000225931.3	4.62453	-1.60373	0.281	-5.70722	1.1484e-08	7.62123e-07
ENSG00000146830.11	3909.46	-0.670872	0.117555	-5.70688	1.15064e-08	7.62123e-07
ENSG00000165983.14	1373.15	0.826385	0.144805	5.70687	1.15071e-08	7.62123e-07
ENSG00000147439.13	482.272	-0.68391	0.119862	-5.70582	1.15785e-08	7.65575e-07
ENSG00000272338.2	37.7538	-0.963269	0.168848	-5.70493	1.1639e-08	7.67827e-07
ENSG00000262370.6	39.3947	-1.2468	0.218555	-5.70475	1.16514e-08	7.67827e-07
ENSG00000280073.1	27.0684	-1.77918	0.311904	-5.70426	1.16849e-08	7.68757e-07
ENSG00000114450.11	2583.53	1.11244	0.195047	5.70344	1.17415e-08	7.69086e-07
ENSG00000062485.19	10087.2	0.61411	0.107675	5.70335	1.17477e-08	7.69086e-07
ENSG00000197880.9	10.558	-2.27837	0.399479	-5.70334	1.17482e-08	7.69086e-07
ENSG00000169733.12	1891.94	-0.975796	0.171136	-5.70187	1.18498e-08	7.7446e-07
ENSG00000198380.13	12010.4	0.990726	0.173783	5.70094	1.19151e-08	7.7712e-07
ENSG00000154342.6	14.4897	2.19807	0.385577	5.70073	1.19297e-08	7.7712e-07
ENSG00000135426.16	264.307	-1.82603	0.320342	-5.70026	1.19623e-08	7.77961e-07
ENSG00000164934.14	4704.34	0.955794	0.167686	5.69988	1.19889e-08	7.78411e-07
ENSG00000171100.15	1059.24	0.676033	0.118628	5.69878	1.20668e-08	7.82188e-07
ENSG00000172932.16	2582.13	-0.892907	0.156748	-5.69646	1.22322e-08	7.91618e-07
ENSG00000198821.11	434.015	-1.84455	0.323844	-5.6958	1.22793e-08	7.93365e-07
ENSG00000254802.1	5.40722	-1.88203	0.330449	-5.69536	1.23113e-08	7.94136e-07
ENSG00000123689.6	463.067	-1.65121	0.2902	-5.6899	1.27112e-08	8.18603e-07
ENSG00000265148.6	106.39	-1.23855	0.217857	-5.68514	1.30705e-08	8.40376e-07
ENSG00000181322.15	26.8684	-1.48585	0.261511	-5.68179	1.33295e-08	8.55636e-07
ENSG00000148358.20	8839.67	0.644094	0.11337	5.68134	1.33645e-08	8.56493e-07
ENSG00000257270.1	87.9619	-1.20122	0.211608	-5.67662	1.37381e-08	8.79016e-07
ENSG00000178996.14	2103.6	0.678227	0.119494	5.67584	1.3801e-08	8.81619e-07
ENSG00000274767.1	39.3483	-2.05599	0.362265	-5.67538	1.3838e-08	8.82556e-07
ENSG00000101166.16	6220.87	0.773476	0.136308	5.67449	1.39104e-08	8.8575e-07
ENSG00000111679.17	3446.95	-0.926008	0.163222	-5.6733	1.4007e-08	8.90109e-07
ENSG00000213131.3	85.6235	1.07369	0.189261	5.6731	1.40238e-08	8.90109e-07
ENSG00000234929.2	13.9542	3.52862	0.622171	5.67145	1.41592e-08	8.97263e-07
ENSG00000146094.15	591.137	-1.03535	0.18266	-5.66818	1.44324e-08	9.13113e-07
ENSG00000213658.12	20.5752	-1.43549	0.253297	-5.66724	1.45116e-08	9.1666e-07
ENSG00000235706.8	238.629	-1.04973	0.185322	-5.66435	1.47583e-08	9.30758e-07
ENSG00000168724.17	3984.03	0.465929	0.0822673	5.6636	1.48228e-08	9.33344e-07
ENSG00000198836.11	5685.82	0.694532	0.12271	5.65995	1.51414e-08	9.50562e-07
ENSG00000141668.10	650.394	-3.44476	0.608644	-5.65972	1.51622e-08	9.50562e-07
ENSG00000170054.16	79.2395	-2.74022	0.484168	-5.65965	1.51683e-08	9.50562e-07
ENSG00000100528.12	4314.82	0.591059	0.104444	5.6591	1.52165e-08	9.51498e-07
ENSG00000010017.13	3329.6	0.598564	0.105773	5.65894	1.52313e-08	9.51498e-07
ENSG00000235576.1	25.5313	-2.00267	0.3541	-5.65565	1.55256e-08	9.68334e-07
ENSG00000261490.1	96.2153	-1.13071	0.199934	-5.65539	1.55497e-08	9.68334e-07
ENSG00000198520.12	148.132	-1.49613	0.264603	-5.65424	1.56536e-08	9.7281e-07
ENSG00000236935.1	10.3783	-1.8071	0.319612	-5.65405	1.56707e-08	9.7281e-07
ENSG00000153064.12	301.367	-2.20209	0.389607	-5.65208	1.58521e-08	9.82531e-07
ENSG00000227620.4	10.0113	-1.60579	0.284223	-5.64974	1.60693e-08	9.94436e-07
ENSG00000242252.2	10.5279	-1.5759	0.279101	-5.64635	1.63888e-08	1.01263e-06
ENSG00000135413.9	17.8567	5.10309	0.903936	5.64541	1.6479e-08	1.01597e-06
ENSG00000254030.1	3.41972	-3.49964	0.619926	-5.64525	1.64942e-08	1.01597e-06
ENSG00000112144.16	2601.54	0.708231	0.125503	5.64314	1.66973e-08	1.02688e-06
ENSG00000048649.13	5670.05	1.05806	0.187651	5.63843	1.71604e-08	1.05276e-06
ENSG00000052802.13	3815.69	1.09578	0.194344	5.63833	1.71712e-08	1.05276e-06
ENSG00000111911.7	2775.78	0.709784	0.125956	5.63518	1.74871e-08	1.07047e-06
ENSG00000185905.4	283.15	-1.76165	0.312785	-5.63214	1.7799e-08	1.08788e-06
ENSG00000226979.9	90.825	-1.93872	0.344292	-5.63103	1.79139e-08	1.09322e-06
ENSG00000182162.11	543.817	-1.52212	0.270337	-5.63046	1.79729e-08	1.09513e-06
ENSG00000269947.1	22.3338	-1.15698	0.20551	-5.62979	1.80426e-08	1.09741e-06
ENSG00000167676.4	1832.45	-2.12064	0.376696	-5.62957	1.80657e-08	1.09741e-06
ENSG00000198728.11	5982.84	-0.553668	0.0983741	-5.62819	1.82112e-08	1.10366e-06
ENSG00000271032.1	28.968	-1.02426	0.181992	-5.62806	1.82244e-08	1.10366e-06
ENSG00000143756.12	4238.28	0.683745	0.121496	5.62772	1.82612e-08	1.10421e-06
ENSG00000115364.14	3312.52	0.597187	0.106125	5.62721	1.83148e-08	1.10576e-06
ENSG00000091592.16	864.821	-1.26645	0.225076	-5.62678	1.83605e-08	1.10683e-06
ENSG00000161813.22	4478.43	0.674478	0.119882	5.62617	1.84256e-08	1.10906e-06
ENSG00000114346.14	3701.24	0.910675	0.161904	5.6248	1.85726e-08	1.11622e-06
ENSG00000087502.18	3047.81	0.705121	0.125407	5.62268	1.88014e-08	1.12664e-06
ENSG00000205086.8	9.56276	-1.83991	0.327231	-5.62267	1.88029e-08	1.12664e-06
ENSG00000232907.8	23.6396	-1.50511	0.267734	-5.62168	1.89112e-08	1.13141e-06
ENSG00000133131.15	2385.07	1.01904	0.18128	5.62135	1.89471e-08	1.13185e-06
ENSG00000254815.6	69.2642	-1.76203	0.313573	-5.61921	1.9183e-08	1.14422e-06
ENSG00000166592.12	73.2639	-1.7634	0.313833	-5.61889	1.92188e-08	1.14463e-06
ENSG00000229425.3	43.7323	-1.75671	0.312674	-5.61835	1.9279e-08	1.14649e-06
ENSG00000166557.14	10368.4	0.914307	0.162777	5.61692	1.94394e-08	1.1543e-06
ENSG00000107742.13	2401.42	-1.70151	0.303008	-5.6154	1.96105e-08	1.16272e-06
ENSG00000111404.7	47.771	-2.15713	0.384298	-5.61317	1.98654e-08	1.17607e-06
ENSG00000172269.19	2838.42	0.769324	0.137065	5.61284	1.99037e-08	1.17658e-06
ENSG00000124783.14	12558.3	0.591343	0.105365	5.61235	1.99603e-08	1.17816e-06
ENSG00000242100.2	12.9505	-2.04198	0.364375	-5.60404	2.09407e-08	1.2342e-06
ENSG00000237705.1	8.00328	-3.08093	0.550198	-5.59968	2.1475e-08	1.2638e-06
ENSG00000271046.1	6.63884	-3.05256	0.545161	-5.59938	2.15116e-08	1.26408e-06
ENSG00000269191.1	6.63585	-1.3304	0.237867	-5.59306	2.23108e-08	1.3091e-06
ENSG00000174013.8	2148.36	0.704777	0.126098	5.58912	2.28225e-08	1.33714e-06
ENSG00000213398.8	184.514	-0.878776	0.157277	-5.58743	2.30456e-08	1.34635e-06
ENSG00000169129.15	1257.53	-1.24675	0.223136	-5.58741	2.30476e-08	1.34635e-06
ENSG00000162461.8	41.1318	-1.07907	0.193136	-5.58709	2.309e-08	1.34683e-06
ENSG00000267342.1	14.7043	-1.01284	0.18145	-5.5819	2.37899e-08	1.38388e-06
ENSG00000279319.1	13.7373	-1.96251	0.351593	-5.58176	2.38091e-08	1.38388e-06
ENSG00000163518.11	16.4815	-2.40822	0.43146	-5.58156	2.38375e-08	1.38388e-06
ENSG00000239713.9	924.927	-1.38085	0.247405	-5.58135	2.38661e-08	1.38388e-06
ENSG00000163534.15	61.3798	-2.85566	0.511667	-5.5811	2.38998e-08	1.38388e-06
ENSG00000110448.11	572.933	-1.7055	0.305758	-5.57795	2.4337e-08	1.40714e-06
ENSG00000214279.13	121.724	-1.323	0.237255	-5.57626	2.45741e-08	1.41878e-06
ENSG00000132463.14	7173.37	0.508923	0.0912759	5.57566	2.46598e-08	1.42165e-06
ENSG00000188981.11	25.2644	-1.12424	0.20169	-5.5741	2.48819e-08	1.43237e-06
ENSG00000145907.16	11590.1	0.627593	0.112631	5.5721	2.51691e-08	1.4468e-06
ENSG00000106404.14	352.542	-0.880117	0.158002	-5.57029	2.5431e-08	1.45938e-06
ENSG00000213003.3	4.06339	-2.7923	0.501302	-5.57008	2.54616e-08	1.45938e-06
ENSG00000248698.6	31.6332	-3.05498	0.548517	-5.56953	2.55427e-08	1.46151e-06
ENSG00000175895.4	6103.23	1.1141	0.20005	5.5691	2.56056e-08	1.46151e-06
ENSG00000135925.9	97.6927	-1.7403	0.312505	-5.56887	2.56394e-08	1.46151e-06
ENSG00000166747.13	7427.76	0.641885	0.115265	5.56878	2.56527e-08	1.46151e-06
ENSG00000119396.11	8506	0.582616	0.104626	5.56857	2.56832e-08	1.46151e-06
ENSG00000111412.6	3572.53	0.714454	0.128323	5.56762	2.58241e-08	1.46742e-06
ENSG00000104388.15	11369.9	0.671283	0.120591	5.56658	2.59783e-08	1.47298e-06
ENSG00000160783.19	1010.02	-0.683346	0.122766	-5.56624	2.60299e-08	1.47298e-06
ENSG00000113456.19	2157.05	0.52544	0.0943982	5.56621	2.60336e-08	1.47298e-06
ENSG00000131914.11	22.233	3.35429	0.60267	5.56573	2.61064e-08	1.47499e-06
ENSG00000125868.16	27311.1	0.795498	0.142943	5.56513	2.61965e-08	1.47797e-06
ENSG00000152402.11	1055.63	1.74642	0.313857	5.5644	2.6305e-08	1.48198e-06
ENSG00000174442.12	1148.39	0.679004	0.122063	5.56273	2.6558e-08	1.49411e-06
ENSG00000158717.11	617.679	-0.880184	0.158299	-5.56028	2.69343e-08	1.51278e-06
ENSG00000224003.1	18.2156	-1.69257	0.304428	-5.55983	2.7004e-08	1.51278e-06
ENSG00000230415.1	23.7588	-1.31554	0.236619	-5.55974	2.70179e-08	1.51278e-06
ENSG00000026297.16	1651.16	-0.972391	0.174904	-5.55958	2.70425e-08	1.51278e-06
ENSG00000144802.11	3616.91	-1.81437	0.326465	-5.55762	2.73483e-08	1.52773e-06
ENSG00000267676.1	3.64611	-1.7803	0.320449	-5.55564	2.76597e-08	1.54253e-06
ENSG00000141933.9	101.875	-1.35718	0.2443	-5.55538	2.77008e-08	1.54253e-06
ENSG00000265678.1	16.5867	-1.13213	0.203797	-5.5552	2.77302e-08	1.54253e-06
ENSG00000132842.14	4128.56	0.51672	0.0930473	5.5533	2.80323e-08	1.55715e-06
ENSG00000234332.1	11.043	-2.29951	0.414191	-5.55181	2.82724e-08	1.56829e-06
ENSG00000109063.15	114.702	-1.1011	0.198357	-5.55108	2.83912e-08	1.57224e-06
ENSG00000143155.13	3762.16	0.556791	0.100307	5.55088	2.8423e-08	1.57224e-06
ENSG00000170266.16	4354.99	0.615363	0.110928	5.54742	2.89915e-08	1.60145e-06
ENSG00000242766.1	35.7452	-2.86838	0.517171	-5.5463	2.91783e-08	1.60919e-06
ENSG00000271779.1	3.55263	-2.72312	0.490998	-5.54609	2.92129e-08	1.60919e-06
ENSG00000211829.9	84.0268	-1.8244	0.329156	-5.54266	2.97917e-08	1.63879e-06
ENSG00000151715.8	1232.54	2.1471	0.387408	5.54222	2.98666e-08	1.64063e-06
ENSG00000113161.16	3468.33	0.735157	0.132705	5.53978	3.02849e-08	1.66131e-06
ENSG00000159579.14	2476.62	0.564774	0.101975	5.53834	3.05351e-08	1.67272e-06
ENSG00000110777.12	820.061	-2.2073	0.398581	-5.5379	3.0612e-08	1.67362e-06
ENSG00000135472.9	525.229	2.14891	0.388047	5.53776	3.06362e-08	1.67362e-06
ENSG00000028277.21	708.778	-1.54995	0.28002	-5.53516	3.10941e-08	1.6963e-06
ENSG00000273733.1	13.1415	-1.39734	0.252486	-5.53434	3.12411e-08	1.70197e-06
ENSG00000160799.11	1911.89	-0.965275	0.174439	-5.53359	3.13746e-08	1.7069e-06
ENSG00000160050.15	330.773	-1.18091	0.213428	-5.53308	3.14648e-08	1.70946e-06
ENSG00000138777.20	3391.49	0.648665	0.117259	5.53192	3.16736e-08	1.71844e-06
ENSG00000255968.1	27.9686	-1.91452	0.346205	-5.53001	3.20208e-08	1.73491e-06
ENSG00000211947.2	2359.66	-2.41628	0.437094	-5.52806	3.23787e-08	1.7519e-06
ENSG00000225880.5	27.7535	-0.857944	0.155232	-5.52686	3.26014e-08	1.76154e-06
ENSG00000283063.1	17.4515	-2.19046	0.396585	-5.52332	3.32662e-08	1.79381e-06
ENSG00000142166.13	5176.23	0.495955	0.0897951	5.52319	3.32892e-08	1.79381e-06
ENSG00000173272.16	2213.37	-1.13124	0.204831	-5.5228	3.33648e-08	1.79544e-06
ENSG00000145014.18	572.503	-0.764426	0.138431	-5.52207	3.35028e-08	1.80042e-06
ENSG00000251301.7	61.1734	-1.7571	0.318383	-5.51881	3.41306e-08	1.83168e-06
ENSG00000224796.1	9.94764	-2.17727	0.394543	-5.51846	3.41991e-08	1.83287e-06
ENSG00000136937.13	3486.68	0.598894	0.108531	5.51817	3.42542e-08	1.83334e-06
ENSG00000273373.1	297.668	-1.01409	0.183892	-5.51461	3.49561e-08	1.86838e-06
ENSG00000264449.6	8.49082	-2.3793	0.431482	-5.51423	3.50302e-08	1.86888e-06
ENSG00000128039.12	2218.39	0.943806	0.171163	5.51409	3.50597e-08	1.86888e-06
ENSG00000113722.17	21.795	-1.45031	0.263046	-5.51355	3.51668e-08	1.87207e-06
ENSG00000115257.15	343.239	-1.55144	0.281421	-5.5129	3.52978e-08	1.87652e-06
ENSG00000197253.13	1051.67	-2.17046	0.393792	-5.51169	3.55414e-08	1.88694e-06
ENSG00000108961.14	30.5791	-1.24282	0.225531	-5.51065	3.57515e-08	1.89189e-06
ENSG00000172115.9	6697.98	0.702071	0.127403	5.51063	3.57547e-08	1.89189e-06
ENSG00000264229.1	5.33916	-2.26238	0.410557	-5.51052	3.5778e-08	1.89189e-06
ENSG00000166411.14	987.615	0.878057	0.159381	5.50917	3.60535e-08	1.90391e-06
ENSG00000280248.1	16.4181	-1.96795	0.357427	-5.50589	3.67312e-08	1.93712e-06
ENSG00000156802.13	5827.13	1.07473	0.195214	5.50541	3.68312e-08	1.93981e-06
ENSG00000135698.10	1509.87	1.11787	0.203069	5.50488	3.69429e-08	1.94311e-06
ENSG00000287609.1	13.6413	-3.2444	0.589407	-5.50451	3.70188e-08	1.94452e-06
ENSG00000180353.11	2629.03	-1.29808	0.23591	-5.50243	3.74588e-08	1.96502e-06
ENSG00000100365.16	472.287	-1.25344	0.227974	-5.49817	3.83759e-08	2.00875e-06
ENSG00000182557.8	40.9574	-1.61724	0.294146	-5.49809	3.83937e-08	2.00875e-06
ENSG00000108671.11	6113.87	0.674157	0.12266	5.49615	3.88178e-08	2.02826e-06
ENSG00000226862.1	6.334	-1.41792	0.258017	-5.49544	3.89739e-08	2.03258e-06
ENSG00000265727.2	8.31111	-3.65228	0.664618	-5.49531	3.90032e-08	2.03258e-06
ENSG00000007392.17	2480.27	-0.711873	0.129617	-5.49214	3.97097e-08	2.06569e-06
ENSG00000250056.8	34.2487	1.91967	0.349541	5.49199	3.97429e-08	2.06569e-06
ENSG00000284194.3	12.7824	-1.56138	0.28445	-5.48912	4.03938e-08	2.09677e-06
ENSG00000162877.13	19.7448	-2.00532	0.365369	-5.48847	4.05434e-08	2.10178e-06
ENSG00000262902.1	549.279	-2.63792	0.480665	-5.48806	4.06367e-08	2.10387e-06
ENSG00000279801.1	33.5222	-1.89142	0.344887	-5.48418	4.15399e-08	2.14782e-06
ENSG00000083937.10	3079.23	0.551509	0.100592	5.48262	4.19071e-08	2.16227e-06
ENSG00000178055.13	4.82809	-2.10004	0.383041	-5.48253	4.19286e-08	2.16227e-06
ENSG00000186106.11	1673.68	0.815802	0.148819	5.48185	4.20905e-08	2.1678e-06
ENSG00000253239.1	9.63286	-3.62561	0.661851	-5.47799	4.30184e-08	2.21271e-06
ENSG00000253875.2	8.47494	-2.20422	0.402444	-5.47709	4.32383e-08	2.22113e-06
ENSG00000164163.11	3909.59	0.599051	0.109384	5.47658	4.33623e-08	2.22462e-06
ENSG00000175602.4	847.262	-1.48522	0.271224	-5.47598	4.35095e-08	2.22842e-06
ENSG00000163154.6	265.199	-1.22545	0.223792	-5.47582	4.35488e-08	2.22842e-06
ENSG00000142330.20	797.854	-0.727247	0.132828	-5.47509	4.37292e-08	2.23476e-06
ENSG00000128159.12	2345.87	-0.733766	0.134033	-5.47454	4.38655e-08	2.23883e-06
ENSG00000115687.14	1215.83	-0.719251	0.131433	-5.47239	4.44014e-08	2.26327e-06
ENSG00000214021.16	779.503	-1.16067	0.212126	-5.47164	4.45899e-08	2.26996e-06
ENSG00000168081.9	46.969	-2.16798	0.396246	-5.47129	4.46762e-08	2.27143e-06
ENSG00000148948.8	290.362	-1.67859	0.306815	-5.47102	4.47455e-08	2.27204e-06
ENSG00000140598.15	2009.09	0.540242	0.0987589	5.4703	4.49263e-08	2.2783e-06
ENSG00000286977.1	93.1116	-1.07014	0.195696	-5.4684	4.54115e-08	2.29996e-06
ENSG00000262001.1	136.939	-1.16359	0.212824	-5.46736	4.56788e-08	2.31054e-06
ENSG00000167615.17	5590.23	-0.816217	0.14931	-5.4666	4.58738e-08	2.31745e-06
ENSG00000142197.12	5143.15	0.879923	0.161032	5.46427	4.64803e-08	2.34509e-06
ENSG00000254887.1	7.2004	-1.85133	0.338841	-5.46371	4.66279e-08	2.34723e-06
ENSG00000228221.6	650.723	2.5206	0.46134	5.46366	4.66412e-08	2.34723e-06
ENSG00000260289.2	31.7357	2.90313	0.531525	5.46189	4.71089e-08	2.36776e-06
ENSG00000260339.1	44.8113	1.30735	0.239477	5.45918	4.78341e-08	2.40116e-06
ENSG00000233968.7	40.4233	-2.0073	0.367939	-5.45551	4.88317e-08	2.44576e-06
ENSG00000187527.11	374.57	2.75033	0.504143	5.45546	4.8846e-08	2.44576e-06
ENSG00000222038.4	4.94698	-2.19984	0.403416	-5.45302	4.95211e-08	2.47643e-06
ENSG00000105639.20	1111.02	-1.50044	0.275189	-5.45239	4.96974e-08	2.48211e-06
ENSG00000240038.6	241.34	-1.229	0.225441	-5.45155	4.99319e-08	2.4887e-06
ENSG00000179583.19	1845.04	-1.41225	0.259058	-5.45147	4.99549e-08	2.4887e-06
ENSG00000166855.9	3116.72	0.575494	0.105588	5.45037	5.02647e-08	2.49965e-06
ENSG00000171962.18	400.876	-1.23889	0.22731	-5.45024	5.03009e-08	2.49965e-06
ENSG00000131724.11	10307	0.737329	0.135294	5.44982	5.0421e-08	2.50247e-06
ENSG00000113569.16	4283.57	0.751101	0.137848	5.44876	5.07232e-08	2.51432e-06
ENSG00000270379.6	11.3408	-2.016	0.370039	-5.44807	5.09189e-08	2.52087e-06
ENSG00000130779.21	5765.53	0.629246	0.115533	5.44646	5.13822e-08	2.54063e-06
ENSG00000264057.1	18.9362	-1.79247	0.329219	-5.4446	5.19214e-08	2.56409e-06
ENSG00000198089.16	1722.47	-0.793988	0.145891	-5.44234	5.25844e-08	2.5936e-06
ENSG00000161911.11	30.4004	-1.34848	0.247805	-5.44169	5.27774e-08	2.59988e-06
ENSG00000145780.8	2771.83	0.866408	0.159256	5.44035	5.31763e-08	2.61441e-06
ENSG00000168918.14	1618.91	-1.21911	0.224091	-5.44026	5.32043e-08	2.61441e-06
ENSG00000160588.10	1124.88	0.887881	0.163232	5.43939	5.3464e-08	2.62391e-06
ENSG00000107317.13	54.625	-2.15011	0.39531	-5.43905	5.35645e-08	2.62559e-06
ENSG00000263272.1	156.662	-0.908159	0.167116	-5.43429	5.50155e-08	2.69338e-06
ENSG00000211941.3	1146.07	-2.43836	0.44898	-5.43089	5.60744e-08	2.74183e-06
ENSG00000232869.2	33.3626	-2.02603	0.373112	-5.4301	5.63227e-08	2.75058e-06
ENSG00000165678.21	10218.3	0.6005	0.110615	5.42876	5.67479e-08	2.76793e-06
ENSG00000127528.6	1507.06	-1.16457	0.214584	-5.42711	5.72751e-08	2.79021e-06
ENSG00000273141.1	4.38448	-1.8577	0.342409	-5.42539	5.78291e-08	2.81114e-06
ENSG00000158560.14	127.376	1.61427	0.297543	5.42533	5.78467e-08	2.81114e-06
ENSG00000251039.2	106.547	-2.87013	0.529507	-5.42037	5.94742e-08	2.88668e-06
ENSG00000196922.10	2530.76	0.732626	0.135195	5.41904	5.99187e-08	2.9047e-06
ENSG00000125503.13	2472.72	-0.743988	0.137334	-5.41738	6.04775e-08	2.92821e-06
ENSG00000250397.2	49.1507	-1.35203	0.249646	-5.41581	6.10132e-08	2.95054e-06
ENSG00000153563.16	965.232	-1.64024	0.302882	-5.41545	6.11336e-08	2.95275e-06
ENSG00000175711.8	331.079	-0.889612	0.164285	-5.41506	6.12665e-08	2.95557e-06
ENSG00000005102.14	273.45	-1.89645	0.350252	-5.41454	6.14449e-08	2.95725e-06
ENSG00000173581.8	1063.45	-1.1163	0.206178	-5.41424	6.15501e-08	2.95725e-06
ENSG00000073921.18	9981.28	0.593399	0.1096	5.41422	6.15559e-08	2.95725e-06
ENSG00000269289.6	20.4069	2.45112	0.45273	5.41409	6.16e-08	2.95725e-06
ENSG00000055957.11	8.07031	-1.96763	0.363614	-5.41132	6.25612e-08	2.99976e-06
ENSG00000170231.16	52.6017	2.6689	0.49327	5.41062	6.28078e-08	3.00723e-06
ENSG00000104442.10	3400.74	0.746683	0.138008	5.41044	6.2869e-08	3.00723e-06
ENSG00000108622.11	217.506	-1.05608	0.195289	-5.4078	6.38049e-08	3.04401e-06
ENSG00000150394.14	40.068	1.6043	0.296668	5.40773	6.383e-08	3.04401e-06
ENSG00000136630.13	140.018	-0.992421	0.183523	-5.40762	6.38685e-08	3.04401e-06
ENSG00000204859.13	1024.77	-0.739911	0.136834	-5.40738	6.39538e-08	3.04442e-06
ENSG00000048462.11	139.695	-2.14373	0.396466	-5.40708	6.40594e-08	3.04578e-06
ENSG00000115486.12	3147.65	0.541504	0.100156	5.40662	6.42257e-08	3.05003e-06
ENSG00000240869.3	6.62601	-2.64216	0.488763	-5.4058	6.4518e-08	3.06024e-06
ENSG00000285417.1	41.0314	-2.24207	0.414811	-5.40503	6.47963e-08	3.06976e-06
ENSG00000281026.1	122.737	-1.1262	0.208415	-5.40364	6.53023e-08	3.08978e-06
ENSG00000238121.6	88.0225	-1.71178	0.316795	-5.40344	6.53749e-08	3.08978e-06
ENSG00000089820.16	1639.08	-1.28294	0.237475	-5.40243	6.57448e-08	3.10356e-06
ENSG00000004961.15	1334.63	0.530733	0.0982578	5.40144	6.61093e-08	3.11705e-06
ENSG00000135249.8	957.54	0.641288	0.118768	5.3995	6.68268e-08	3.14714e-06
ENSG00000232411.1	5.64077	-2.03765	0.377439	-5.39862	6.71573e-08	3.15895e-06
ENSG00000147677.11	23126.8	0.884803	0.163929	5.39749	6.75804e-08	3.17256e-06
ENSG00000159753.14	377.446	-1.7765	0.329138	-5.39742	6.7607e-08	3.17256e-06
ENSG00000141519.15	706.714	-1.1554	0.214081	-5.39702	6.77575e-08	3.17586e-06
ENSG00000213341.11	1805.62	0.540957	0.10025	5.39609	6.81102e-08	3.18862e-06
ENSG00000231128.6	2.85826	-2.17499	0.403138	-5.39516	6.84642e-08	3.20141e-06
ENSG00000038210.14	1897.73	0.706867	0.131034	5.39452	6.87085e-08	3.20904e-06
ENSG00000115561.16	4617.33	0.471153	0.0873713	5.39254	6.9468e-08	3.24069e-06
ENSG00000225663.8	3983.16	-0.976967	0.181215	-5.39121	6.99853e-08	3.26098e-06
ENSG00000102144.15	27024.6	0.773343	0.143458	5.39073	7.01721e-08	3.26585e-06
ENSG00000213260.3	97.5374	1.1301	0.209682	5.38958	7.06214e-08	3.2829e-06
ENSG00000261168.1	17.4225	-1.49087	0.276653	-5.38896	7.08678e-08	3.29049e-06
ENSG00000242267.6	8.08141	-2.18334	0.405311	-5.38682	7.17136e-08	3.32586e-06
ENSG00000170128.5	9.89589	-2.5006	0.464269	-5.3861	7.20013e-08	3.3353e-06
ENSG00000100628.12	107.36	-1.50481	0.279509	-5.38376	7.29451e-08	3.37507e-06
ENSG00000141577.14	1251.49	-1.1125	0.20665	-5.38352	7.30444e-08	3.37572e-06
ENSG00000122223.13	58.1093	-1.61079	0.299457	-5.37905	7.48783e-08	3.45644e-06
ENSG00000197114.12	212.55	-1.0059	0.187065	-5.37729	7.56155e-08	3.48641e-06
ENSG00000156413.14	111.234	2.81575	0.524048	5.37308	7.74046e-08	3.56475e-06
ENSG00000267543.1	11.1617	-1.0546	0.196311	-5.3721	7.78257e-08	3.57998e-06
ENSG00000009844.16	3176.57	0.629946	0.117275	5.37152	7.80754e-08	3.58322e-06
ENSG00000091140.14	4862.26	0.585868	0.109069	5.37152	7.80769e-08	3.58322e-06
ENSG00000262410.1	27.2509	-1.24331	0.231478	-5.37121	7.82099e-08	3.58516e-06
ENSG00000243708.10	11.9275	-1.56758	0.291886	-5.37053	7.85074e-08	3.59464e-06
ENSG00000110906.13	3916.83	0.3673	0.0683989	5.36997	7.87514e-08	3.60165e-06
ENSG00000273812.3	89.2123	1.84022	0.34276	5.36883	7.92472e-08	3.61799e-06
ENSG00000133706.19	7747	0.479881	0.0893859	5.36864	7.93321e-08	3.61799e-06
ENSG00000244575.3	551.202	-2.35194	0.438099	-5.36853	7.93828e-08	3.61799e-06
ENSG00000248489.2	32.4871	-0.950713	0.177126	-5.36744	7.98612e-08	3.63561e-06
ENSG00000279675.1	28.4155	-1.70925	0.318475	-5.36699	8.00628e-08	3.64061e-06
ENSG00000229474.7	111.458	-1.46391	0.272865	-5.36495	8.09704e-08	3.67766e-06
ENSG00000162739.14	491.612	-1.88999	0.352484	-5.36193	8.2337e-08	3.73197e-06
ENSG00000113384.14	9242.58	0.595012	0.110972	5.36181	8.23901e-08	3.73197e-06
ENSG00000178028.14	1902.75	-0.666056	0.124225	-5.36169	8.2449e-08	3.73197e-06
ENSG00000077721.16	4297.52	0.465974	0.0869411	5.35965	8.33814e-08	3.76987e-06
ENSG00000229108.2	14.3101	-2.02111	0.377123	-5.35928	8.35555e-08	3.77343e-06
ENSG00000264007.1	3.76208	-2.52698	0.471541	-5.35898	8.3692e-08	3.77461e-06
ENSG00000005206.17	2131.54	-0.824165	0.153796	-5.35881	8.37723e-08	3.77461e-06
ENSG00000101439.9	16762.4	-1.29696	0.242067	-5.35786	8.4212e-08	3.79011e-06
ENSG00000111913.20	738.179	-1.72846	0.322628	-5.35744	8.4408e-08	3.79462e-06
ENSG00000099840.14	111.842	-1.28274	0.23953	-5.35525	8.54397e-08	3.83665e-06
ENSG00000221887.6	15.3138	-1.96511	0.366975	-5.3549	8.56029e-08	3.83963e-06
ENSG00000099864.18	1602.42	-1.24489	0.232501	-5.35437	8.58546e-08	3.84656e-06
ENSG00000100450.13	154.078	-1.86618	0.348595	-5.35343	8.6301e-08	3.86219e-06
ENSG00000185614.7	85.8947	-1.0087	0.18843	-5.35321	8.64095e-08	3.86268e-06
ENSG00000171872.5	9.59442	2.40437	0.449438	5.34973	8.80852e-08	3.93315e-06
ENSG00000254709.8	73.6041	-2.27978	0.426168	-5.34949	8.82035e-08	3.934e-06
ENSG00000122958.15	4394.5	0.554957	0.103775	5.34772	8.907e-08	3.96817e-06
ENSG00000089012.14	218.301	-1.93554	0.362026	-5.34641	8.97151e-08	3.99242e-06
ENSG00000267369.1	64.9259	-1.67423	0.313275	-5.34428	9.07754e-08	4.03507e-06
ENSG00000164494.12	1145.23	0.575122	0.107691	5.3405	9.26908e-08	4.1156e-06
ENSG00000137513.10	1165.65	0.840601	0.157466	5.33829	9.38248e-08	4.15854e-06
ENSG00000182487.12	81.3446	-1.64664	0.308469	-5.33809	9.39332e-08	4.15854e-06
ENSG00000079263.19	403.807	-1.52054	0.284861	-5.33783	9.40678e-08	4.15854e-06
ENSG00000167604.15	289.966	-0.818787	0.153394	-5.33781	9.4078e-08	4.15854e-06
ENSG00000162819.12	5440.04	0.715685	0.134113	5.33645	9.47866e-08	4.18519e-06
ENSG00000132478.10	1791.92	-0.648242	0.121523	-5.3343	9.59117e-08	4.23015e-06
ENSG00000237181.1	38.9694	-1.18038	0.221333	-5.33307	9.65667e-08	4.2537e-06
ENSG00000137713.16	1918.24	0.563367	0.10564	5.33289	9.66603e-08	4.2537e-06
ENSG00000102158.20	7336.93	0.611205	0.114641	5.33149	9.74083e-08	4.28186e-06
ENSG00000228427.3	26.8069	-1.36646	0.25631	-5.33127	9.75289e-08	4.2824e-06
ENSG00000159267.15	2687.74	0.593811	0.111442	5.32841	9.9075e-08	4.34547e-06
ENSG00000122884.12	4956.86	0.937375	0.175951	5.32749	9.95815e-08	4.36286e-06
ENSG00000184293.7	53.278	-1.55642	0.29216	-5.32727	9.96995e-08	4.3632e-06
ENSG00000213236.3	25.0168	1.03393	0.194113	5.32646	1.00145e-07	4.37784e-06
ENSG00000240143.1	6.17699	-1.76783	0.331927	-5.32595	1.00429e-07	4.38544e-06
ENSG00000158615.9	6265.13	0.598659	0.112455	5.32352	1.01778e-07	4.43943e-06
ENSG00000003436.16	1569	1.60984	0.302456	5.32256	1.02318e-07	4.45809e-06
ENSG00000223704.2	34.0847	-1.41847	0.266574	-5.32112	1.03133e-07	4.48865e-06
ENSG00000184432.11	16338.5	0.576807	0.108413	5.32045	1.03508e-07	4.50006e-06
ENSG00000189233.12	85.6407	-1.76108	0.331085	-5.31912	1.04271e-07	4.52824e-06
ENSG00000119632.4	692.196	-1.23521	0.232278	-5.31778	1.05039e-07	4.55367e-06
ENSG00000229228.1	14.0046	-2.25822	0.42466	-5.3177	1.05087e-07	4.55367e-06
ENSG00000275484.1	35.4188	-1.51439	0.284819	-5.31701	1.05488e-07	4.56608e-06
ENSG00000151846.8	59.7825	1.15257	0.216788	5.31657	1.05741e-07	4.57203e-06
ENSG00000145740.19	2993.99	0.599523	0.112799	5.31498	1.06669e-07	4.6071e-06
ENSG00000124370.11	686.677	0.626456	0.117873	5.31468	1.06842e-07	4.60959e-06
ENSG00000285103.2	60.5983	-1.43713	0.270447	-5.31388	1.07313e-07	4.62487e-06
ENSG00000104343.21	2711.68	0.74184	0.139656	5.31192	1.08474e-07	4.6698e-06
ENSG00000133641.18	967.313	0.544068	0.102452	5.31049	1.0933e-07	4.70157e-06
ENSG00000215375.6	558.199	-1.04838	0.197436	-5.31	1.09624e-07	4.70906e-06
ENSG00000180398.13	5873.33	0.527363	0.0993394	5.30869	1.10414e-07	4.73453e-06
ENSG00000261221.4	919.327	-0.738115	0.139046	-5.30844	1.10569e-07	4.73453e-06
ENSG00000167588.13	534.71	-1.97458	0.371971	-5.30843	1.10575e-07	4.73453e-06
ENSG00000114209.15	2524.09	0.481154	0.0906634	5.30704	1.11422e-07	4.76564e-06
ENSG00000233609.3	9.52148	-1.74085	0.328077	-5.30624	1.1191e-07	4.77894e-06
ENSG00000173567.15	35.0656	-1.08376	0.204246	-5.30613	1.11974e-07	4.77894e-06
ENSG00000279127.1	6.40514	3.79503	0.71549	5.3041	1.13231e-07	4.82247e-06
ENSG00000114626.18	1446.62	-0.882325	0.166349	-5.30405	1.13258e-07	4.82247e-06
ENSG00000115514.12	1490.94	0.492097	0.0927834	5.30372	1.13467e-07	4.82247e-06
ENSG00000225720.6	8.15914	-1.93798	0.365402	-5.3037	1.13481e-07	4.82247e-06
ENSG00000231969.2	10.0534	-1.35765	0.256024	-5.30282	1.14029e-07	4.84055e-06
ENSG00000196092.14	197.263	-2.54285	0.479638	-5.3016	1.14794e-07	4.86782e-06
ENSG00000287920.1	8.66004	-1.75666	0.331419	-5.30043	1.15533e-07	4.89389e-06
ENSG00000057608.17	20062.5	0.626738	0.118254	5.29991	1.1586e-07	4.90251e-06
ENSG00000286588.1	18.1436	-1.59108	0.300282	-5.29861	1.16685e-07	4.93023e-06
ENSG00000114841.17	616.121	-0.967238	0.18255	-5.29849	1.16764e-07	4.93023e-06
ENSG00000105373.19	11881.6	-0.991486	0.187282	-5.29408	1.19614e-07	5.0452e-06
ENSG00000119242.9	2292.11	-0.524807	0.0991356	-5.29383	1.19781e-07	5.04685e-06
ENSG00000113282.14	5036.78	0.558764	0.105564	5.29314	1.20231e-07	5.06042e-06
ENSG00000213203.3	332.918	-1.26932	0.239834	-5.29249	1.20661e-07	5.07031e-06
ENSG00000263264.2	26.6326	-1.56416	0.295548	-5.2924	1.20722e-07	5.07031e-06
ENSG00000165917.10	11.2325	-1.60667	0.3036	-5.29206	1.20947e-07	5.07441e-06
ENSG00000222020.3	22.6736	-1.1897	0.224924	-5.28934	1.22759e-07	5.14495e-06
ENSG00000132294.15	7314.33	0.782555	0.147991	5.28786	1.23758e-07	5.18137e-06
ENSG00000105559.12	1416.45	-1.21411	0.229652	-5.28675	1.24511e-07	5.20137e-06
ENSG00000165178.9	115.511	-1.58984	0.300729	-5.28662	1.24596e-07	5.20137e-06
ENSG00000005893.16	15295.4	0.578621	0.109451	5.28657	1.2463e-07	5.20137e-06
ENSG00000087157.19	1544.42	-0.723711	0.136926	-5.2854	1.25429e-07	5.22921e-06
ENSG00000267838.2	51.2618	-1.27966	0.242124	-5.28515	1.25602e-07	5.23092e-06
ENSG00000197536.11	340.33	-1.07505	0.203418	-5.28495	1.2574e-07	5.23114e-06
ENSG00000227471.9	93.7789	2.19318	0.415018	5.28453	1.26027e-07	5.23761e-06
ENSG00000169764.16	6406.5	0.592736	0.112186	5.28351	1.26732e-07	5.26138e-06
ENSG00000243264.2	337.17	-2.62959	0.497751	-5.28294	1.2713e-07	5.27236e-06
ENSG00000260997.1	63.642	-1.39478	0.264083	-5.28159	1.28064e-07	5.30556e-06
ENSG00000254910.1	41.3465	-1.11751	0.211605	-5.2811	1.28408e-07	5.31426e-06
ENSG00000163093.12	306.856	-0.750907	0.142231	-5.27951	1.29533e-07	5.3552e-06
ENSG00000108342.13	5.5521	-2.71445	0.514198	-5.279	1.29894e-07	5.36451e-06
ENSG00000185739.13	37.3747	-1.05876	0.200642	-5.27684	1.31428e-07	5.42224e-06
ENSG00000176871.9	4413	0.628576	0.119196	5.27345	1.33882e-07	5.51774e-06
ENSG00000260455.2	14.1565	-1.33521	0.253244	-5.27243	1.34628e-07	5.5427e-06
ENSG00000163126.15	59.3635	-1.00689	0.191117	-5.26846	1.37574e-07	5.65812e-06
ENSG00000163291.14	797.302	0.873798	0.165888	5.26739	1.38375e-07	5.68134e-06
ENSG00000264345.2	10.9406	-1.75752	0.333664	-5.26733	1.38426e-07	5.68134e-06
ENSG00000261067.7	8.31432	-1.18871	0.22569	-5.26702	1.38658e-07	5.6826e-06
ENSG00000164134.13	3835.78	0.57024	0.108269	5.2669	1.38743e-07	5.6826e-06
ENSG00000212694.8	513.592	-1.00476	0.190791	-5.2663	1.39201e-07	5.69546e-06
ENSG00000185433.10	8.69468	-1.88211	0.357438	-5.26557	1.39755e-07	5.71223e-06
ENSG00000107816.17	4026.63	-0.675179	0.128251	-5.2645	1.40573e-07	5.73974e-06
ENSG00000227495.1	12.6948	-1.2861	0.244359	-5.26316	1.41603e-07	5.77178e-06
ENSG00000170340.11	2847.5	0.737078	0.140046	5.2631	1.4165e-07	5.77178e-06
ENSG00000249207.2	42.047	-1.34814	0.256198	-5.26211	1.42415e-07	5.79701e-06
ENSG00000287535.1	27.4026	2.40057	0.456275	5.26124	1.43089e-07	5.81382e-06
ENSG00000211802.3	8.22551	-1.94042	0.368817	-5.2612	1.43121e-07	5.81382e-06
ENSG00000239697.11	707.052	-0.874115	0.166151	-5.26098	1.43288e-07	5.81462e-06
ENSG00000278784.1	138.179	-0.76449	0.145347	-5.25974	1.44256e-07	5.8479e-06
ENSG00000270127.2	137.484	-1.19253	0.226751	-5.25921	1.44678e-07	5.85218e-06
ENSG00000272529.1	24.3058	-1.46234	0.278058	-5.25912	1.44749e-07	5.85218e-06
ENSG00000114686.9	5074.22	0.523667	0.0995758	5.25898	1.44856e-07	5.85218e-06
ENSG00000211897.9	20173.3	-2.19012	0.416463	-5.25886	1.44952e-07	5.85218e-06
ENSG00000126562.17	1149.38	-2.12367	0.403844	-5.25865	1.45119e-07	5.85295e-06
ENSG00000254536.2	23.6679	-1.01704	0.193538	-5.25498	1.48043e-07	5.96396e-06
ENSG00000235304.2	18.9393	-2.30824	0.439261	-5.25482	1.48173e-07	5.96396e-06
ENSG00000065833.9	1228.43	1.51615	0.288603	5.25341	1.49312e-07	6.00372e-06
ENSG00000287403.1	2.87486	-3.23776	0.61652	-5.25168	1.5072e-07	6.05417e-06
ENSG00000275557.1	26.3167	-1.69189	0.32223	-5.25054	1.5165e-07	6.08535e-06
ENSG00000198756.12	106.925	-1.44436	0.275105	-5.25022	1.51914e-07	6.08977e-06
ENSG00000273338.1	10.2805	-1.66174	0.316582	-5.249	1.52929e-07	6.12429e-06
ENSG00000182979.18	2371.29	-0.674	0.128415	-5.24862	1.53242e-07	6.1306e-06
ENSG00000102245.8	114.028	-1.89253	0.360616	-5.24806	1.53713e-07	6.14326e-06
ENSG00000120438.12	10389.9	0.689794	0.131444	5.24782	1.5391e-07	6.14494e-06
ENSG00000099326.9	1075.61	-0.792523	0.151057	-5.24652	1.55002e-07	6.18018e-06
ENSG00000197119.13	2574.54	-0.931496	0.17755	-5.24639	1.55105e-07	6.18018e-06
ENSG00000230747.1	5.02052	-1.91685	0.365393	-5.24601	1.55431e-07	6.18693e-06
ENSG00000125484.12	4060.82	0.588031	0.112101	5.24557	1.55799e-07	6.19535e-06
ENSG00000247092.7	204.373	-0.678715	0.12943	-5.24389	1.57227e-07	6.24588e-06
ENSG00000231793.5	20.0742	-1.54785	0.295212	-5.24318	1.57834e-07	6.26371e-06
ENSG00000138162.19	3822.68	0.904578	0.172534	5.24289	1.58077e-07	6.26705e-06
ENSG00000267523.1	84.2664	-1.43196	0.273157	-5.24229	1.586e-07	6.28151e-06
ENSG00000187288.12	202.209	-2.33548	0.44553	-5.24204	1.5881e-07	6.28188e-06
ENSG00000146215.14	26.1732	-1.71776	0.327698	-5.24191	1.58927e-07	6.28188e-06
ENSG00000250506.8	8.78847	-1.129	0.215423	-5.24085	1.59842e-07	6.31177e-06
ENSG00000114030.13	2812	0.494495	0.0943883	5.23894	1.61501e-07	6.37093e-06
ENSG00000165194.15	284.733	-1.60682	0.306763	-5.23799	1.62332e-07	6.39733e-06
ENSG00000127870.17	2467.98	0.545001	0.104055	5.2376	1.62676e-07	6.40452e-06
ENSG00000211592.8	159188	-2.15609	0.411688	-5.2372	1.63035e-07	6.41068e-06
ENSG00000099866.15	24.0351	-1.33559	0.255027	-5.23706	1.63156e-07	6.41068e-06
ENSG00000053438.11	74.7769	-1.53715	0.293593	-5.23565	1.64408e-07	6.45346e-06
ENSG00000211771.1	3.52927	-2.64205	0.504866	-5.23317	1.66632e-07	6.53427e-06
ENSG00000169398.19	9409.87	0.719203	0.13746	5.23209	1.67608e-07	6.56606e-06
ENSG00000138035.15	2531.72	0.574531	0.109915	5.22707	1.72213e-07	6.73981e-06
ENSG00000151726.15	6159.13	1.18061	0.225892	5.22645	1.72797e-07	6.75595e-06
ENSG00000281103.2	123.255	-1.5017	0.28741	-5.22494	1.74207e-07	6.80438e-06
ENSG00000273703.2	9.73125	-2.86937	0.549197	-5.22466	1.74477e-07	6.8082e-06
ENSG00000265666.1	109.353	-1.25913	0.241056	-5.22339	1.75677e-07	6.8483e-06
ENSG00000111796.4	114.898	-1.6383	0.313683	-5.2228	1.76233e-07	6.86321e-06
ENSG00000273432.1	12.7279	-1.19333	0.228502	-5.22241	1.76612e-07	6.87121e-06
ENSG00000272256.1	2.58148	-1.76372	0.337826	-5.2208	1.78154e-07	6.92441e-06
ENSG00000114349.10	2.54115	-1.90289	0.364527	-5.22018	1.78752e-07	6.94082e-06
ENSG00000135763.10	1463.02	0.668417	0.128068	5.21922	1.79679e-07	6.97001e-06
ENSG00000134339.9	239.883	-2.30183	0.441069	-5.21875	1.80139e-07	6.98101e-06
ENSG00000260005.6	25.1108	-1.16325	0.222944	-5.21768	1.81175e-07	7.01431e-06
ENSG00000256069.7	17.8529	-1.62123	0.310745	-5.21723	1.81615e-07	7.02445e-06
ENSG00000146067.16	1811.62	-0.662981	0.127082	-5.21696	1.81888e-07	7.02816e-06
ENSG00000258521.1	8.47363	-1.39946	0.268344	-5.21516	1.83657e-07	7.0896e-06
ENSG00000221716.1	32.0318	-1.67292	0.320826	-5.21442	1.84393e-07	7.10441e-06
ENSG00000197549.9	6.83079	-3.43391	0.65856	-5.21427	1.84545e-07	7.10441e-06
ENSG00000163558.13	3205.93	0.634467	0.121681	5.21417	1.8464e-07	7.10441e-06
ENSG00000117090.15	273.67	-1.7909	0.343475	-5.21405	1.84758e-07	7.10441e-06
ENSG00000166337.10	134.683	-0.871337	0.167167	-5.21238	1.86428e-07	7.16145e-06
ENSG00000258168.6	22.0457	-1.63056	0.312834	-5.21221	1.86603e-07	7.16145e-06
ENSG00000122122.10	1046.5	-1.37353	0.263564	-5.21138	1.87441e-07	7.18661e-06
ENSG00000120805.14	7268.58	0.59108	0.113463	5.20946	1.89396e-07	7.24855e-06
ENSG00000155008.14	1619.08	0.726903	0.139536	5.20943	1.89422e-07	7.24855e-06
ENSG00000276830.1	1.06749	-3.03636	0.583403	-5.20457	1.94443e-07	7.43349e-06
ENSG00000278195.2	27.4839	-1.89914	0.364954	-5.20379	1.95261e-07	7.45759e-06
ENSG00000167904.15	1658.26	0.804787	0.154705	5.20207	1.97083e-07	7.51993e-06
ENSG00000231621.1	8.16224	-2.58195	0.496415	-5.20119	1.98016e-07	7.54825e-06
ENSG00000104231.11	2204.39	0.72241	0.138922	5.2001	1.99181e-07	7.58535e-06
ENSG00000286319.1	7.19118	-1.69392	0.32579	-5.19943	1.99899e-07	7.60536e-06
ENSG00000124532.15	2164.67	0.486289	0.0935426	5.19858	2.00817e-07	7.63296e-06
ENSG00000171608.16	1207.82	-1.27214	0.24472	-5.19835	2.0106e-07	7.6349e-06
ENSG00000164850.15	268.545	-1.49535	0.287775	-5.19626	2.03342e-07	7.71413e-06
ENSG00000011677.13	31.6872	3.48266	0.670466	5.19439	2.05395e-07	7.78459e-06
ENSG00000189129.14	163.775	-1.29848	0.250028	-5.19333	2.0657e-07	7.82162e-06
ENSG00000167968.13	89.5769	-1.26896	0.244367	-5.19283	2.07119e-07	7.83492e-06
ENSG00000239899.3	8.94798	-2.09967	0.404399	-5.19206	2.07975e-07	7.85978e-06
ENSG00000271375.1	16.0734	-2.60473	0.501754	-5.19125	2.08888e-07	7.88676e-06
ENSG00000268061.5	39.2783	-0.863502	0.166378	-5.19001	2.10281e-07	7.93181e-06
ENSG00000272834.1	5.55046	-1.36478	0.263077	-5.18775	2.12848e-07	8.02099e-06
ENSG00000163239.12	30.0259	-1.18386	0.228226	-5.18722	2.13458e-07	8.03632e-06
ENSG00000160185.15	158.561	-1.73896	0.335282	-5.18655	2.14224e-07	8.05751e-06
ENSG00000134970.14	5596.13	0.784097	0.151222	5.18508	2.15924e-07	8.11376e-06
ENSG00000168092.14	6185.06	0.44681	0.086195	5.18371	2.17519e-07	8.1649e-06
ENSG00000196562.14	10911.3	-1.15389	0.222606	-5.18355	2.17698e-07	8.1649e-06
ENSG00000178074.6	1368.88	0.615635	0.118778	5.18308	2.18254e-07	8.17802e-06
ENSG00000257704.4	499.296	-0.982775	0.18964	-5.18233	2.19135e-07	8.20326e-06
ENSG00000259702.3	16.1685	2.56856	0.495669	5.182	2.1952e-07	8.20991e-06
ENSG00000156831.8	1640.57	0.729188	0.140746	5.18086	2.20862e-07	8.25231e-06
ENSG00000282951.1	12.8615	-1.09031	0.21048	-5.18012	2.21741e-07	8.27736e-06
ENSG00000205423.11	675.42	0.541672	0.104585	5.17927	2.2276e-07	8.30084e-06
ENSG00000126950.8	40.9729	-1.64941	0.318465	-5.17924	2.22789e-07	8.30084e-06
ENSG00000183828.15	787.447	-0.99829	0.192797	-5.17792	2.24368e-07	8.35179e-06
ENSG00000233705.7	30.7853	-2.21613	0.428051	-5.17724	2.25189e-07	8.37347e-06
ENSG00000286935.1	13.0068	-3.19296	0.616748	-5.17709	2.25373e-07	8.37347e-06
ENSG00000189409.14	4.2961	-1.6684	0.322304	-5.17648	2.26106e-07	8.39285e-06
ENSG00000179796.12	7.82133	-2.10214	0.406164	-5.17561	2.27167e-07	8.42434e-06
ENSG00000100883.13	4367.85	0.501892	0.0969859	5.1749	2.2803e-07	8.44842e-06
ENSG00000101367.9	9203.23	0.507056	0.0980272	5.1726	2.30853e-07	8.54502e-06
ENSG00000186704.9	4.54446	-2.16683	0.418965	-5.17187	2.31766e-07	8.57078e-06
ENSG00000111670.16	4306.74	0.710611	0.137426	5.17086	2.33022e-07	8.60922e-06
ENSG00000169504.15	12471	0.796646	0.154084	5.17021	2.33829e-07	8.63096e-06
ENSG00000127415.13	772.778	-0.952069	0.18417	-5.16951	2.34714e-07	8.6494e-06
ENSG00000105388.16	5840.72	3.13484	0.606416	5.16946	2.34765e-07	8.6494e-06
ENSG00000134077.16	2224.37	0.469805	0.0909289	5.16673	2.38223e-07	8.76529e-06
ENSG00000236320.4	7.96268	-1.77532	0.343613	-5.16663	2.38353e-07	8.76529e-06
ENSG00000237111.1	19.6432	-2.67123	0.517113	-5.16566	2.39588e-07	8.80252e-06
ENSG00000205436.7	68.3369	-1.73433	0.335791	-5.1649	2.40566e-07	8.81985e-06
ENSG00000275418.1	5.21993	-2.69527	0.521851	-5.16483	2.40664e-07	8.81985e-06
ENSG00000253535.5	5.76698	-2.45754	0.475828	-5.16478	2.40728e-07	8.81985e-06
ENSG00000188011.5	8.71933	-2.64641	0.512516	-5.16356	2.42292e-07	8.86896e-06
ENSG00000010295.20	506.479	-0.892378	0.172835	-5.16319	2.42781e-07	8.8761e-06
ENSG00000260051.1	24.9887	-1.34276	0.260071	-5.16306	2.42948e-07	8.8761e-06
ENSG00000136490.9	1632.01	-1.58234	0.306483	-5.1629	2.43159e-07	8.8761e-06
ENSG00000164619.10	69.6962	-1.74565	0.338305	-5.15999	2.46966e-07	9.00675e-06
ENSG00000229769.2	4.64458	-2.42154	0.469356	-5.15929	2.47894e-07	9.02799e-06
ENSG00000280721.1	49.347	-1.25801	0.243839	-5.1592	2.48004e-07	9.02799e-06
ENSG00000214783.9	106.312	-1.0143	0.196615	-5.15881	2.48528e-07	9.0351e-06
ENSG00000080823.23	688.779	-0.802417	0.155546	-5.15871	2.48656e-07	9.0351e-06
ENSG00000173442.13	2622.13	-0.819142	0.158811	-5.15796	2.49649e-07	9.06288e-06
ENSG00000198590.12	89.7733	-1.35778	0.263251	-5.15773	2.49961e-07	9.06589e-06
ENSG00000076662.10	85.229	-1.64197	0.318425	-5.15654	2.51561e-07	9.11557e-06
ENSG00000241769.7	64.9854	-1.39979	0.271497	-5.15581	2.52532e-07	9.14238e-06
ENSG00000152076.19	323.626	-1.66614	0.323192	-5.15525	2.53287e-07	9.14869e-06
ENSG00000179144.5	703.319	-1.31151	0.254403	-5.15522	2.53333e-07	9.14869e-06
ENSG00000135547.9	417.035	-1.4725	0.285636	-5.15517	2.53399e-07	9.14869e-06
ENSG00000166289.6	631.428	-1.48588	0.288346	-5.15311	2.56207e-07	9.23501e-06
ENSG00000186660.15	4812.2	0.497199	0.0964878	5.15298	2.56382e-07	9.23501e-06
ENSG00000013375.16	2514.13	0.70146	0.136131	5.15283	2.56582e-07	9.23501e-06
ENSG00000138600.10	4212.44	0.689058	0.133727	5.15273	2.56722e-07	9.23501e-06
ENSG00000152484.14	2115.39	0.541355	0.105067	5.15246	2.57094e-07	9.24e-06
ENSG00000232021.7	24.8724	-1.15576	0.224337	-5.15191	2.57849e-07	9.24756e-06
ENSG00000099769.6	174.927	-1.93033	0.374687	-5.15184	2.57948e-07	9.24756e-06
ENSG00000286882.1	3.08107	-2.86669	0.556446	-5.15179	2.58005e-07	9.24756e-06
ENSG00000120992.18	6402.5	0.850252	0.16507	5.15086	2.59295e-07	9.28537e-06
ENSG00000150776.18	1971.72	0.452478	0.0878502	5.15056	2.59708e-07	9.29179e-06
ENSG00000211747.3	66.5866	-1.89893	0.368905	-5.14747	2.64022e-07	9.43759e-06
ENSG00000283297.2	34.402	-1.31141	0.254831	-5.1462	2.65823e-07	9.4934e-06
ENSG00000237017.1	30.5228	-1.07672	0.209251	-5.14559	2.6668e-07	9.51544e-06
ENSG00000213654.10	1546.55	-1.22715	0.238634	-5.14238	2.71286e-07	9.67106e-06
ENSG00000261578.1	299.501	1.68953	0.328583	5.14187	2.72022e-07	9.68858e-06
ENSG00000048544.6	2777.9	0.488689	0.0950644	5.14061	2.73855e-07	9.73662e-06
ENSG00000218283.2	413.568	0.61894	0.120402	5.1406	2.73862e-07	9.73662e-06
ENSG00000167393.18	767.964	-0.808471	0.157283	-5.14022	2.74415e-07	9.7475e-06
ENSG00000138071.14	18717.7	0.536928	0.104463	5.13991	2.74876e-07	9.75513e-06
ENSG00000156298.13	357.653	-1.37395	0.267341	-5.1393	2.75758e-07	9.77767e-06
ENSG00000152620.13	2047.1	0.607256	0.118173	5.13871	2.76626e-07	9.79968e-06
ENSG00000164941.14	3183.88	0.662085	0.128852	5.13834	2.77181e-07	9.80292e-06
ENSG00000116824.5	1221.72	-1.68924	0.328753	-5.13832	2.77212e-07	9.80292e-06
ENSG00000140525.19	2635.58	0.838237	0.163145	5.138	2.77683e-07	9.81081e-06
ENSG00000188706.13	4709.1	0.677389	0.131856	5.13735	2.78646e-07	9.83607e-06
ENSG00000080947.15	176.217	-0.961977	0.187332	-5.13515	2.81921e-07	9.94279e-06
ENSG00000126246.10	45.9535	-1.11349	0.216899	-5.13367	2.84145e-07	1.00123e-05
ENSG00000152749.8	1294.07	0.804514	0.156743	5.1327	2.85614e-07	1.00551e-05
ENSG00000200156.1	20.7303	5.62477	1.09621	5.13113	2.88009e-07	1.01233e-05
ENSG00000003756.17	3796.55	-0.557064	0.108566	-5.1311	2.88061e-07	1.01233e-05
ENSG00000182600.9	101.729	-1.16635	0.227335	-5.13052	2.88939e-07	1.01451e-05
ENSG00000250069.1	5.48981	-2.4562	0.478765	-5.13029	2.89303e-07	1.01489e-05
ENSG00000249502.3	24.9971	-1.38039	0.269135	-5.129	2.91289e-07	1.02075e-05
ENSG00000256720.1	4.26758	-1.96964	0.384031	-5.12887	2.91487e-07	1.02075e-05
ENSG00000112062.11	3763.04	0.433027	0.0844698	5.12641	2.95317e-07	1.03325e-05
ENSG00000120694.20	9952.84	0.788198	0.15379	5.12515	2.97305e-07	1.03928e-05
ENSG00000145391.13	6290.32	0.739455	0.144296	5.12457	2.98224e-07	1.04157e-05
ENSG00000165097.16	2054.51	0.680513	0.132819	5.12363	2.99709e-07	1.04584e-05
ENSG00000130748.7	242.083	-1.09127	0.212998	-5.12336	3.00144e-07	1.04643e-05
ENSG00000027869.12	324.859	-1.4913	0.291116	-5.12271	3.01173e-07	1.0491e-05
ENSG00000204314.12	160.856	-1.14623	0.223771	-5.12235	3.01755e-07	1.0502e-05
ENSG00000230709.1	3.60952	-2.58451	0.504593	-5.12197	3.02355e-07	1.05137e-05
ENSG00000199627.1	2.47103	-3.05703	0.596887	-5.12163	3.02903e-07	1.05235e-05
ENSG00000184226.15	279.563	-2.19424	0.428506	-5.12067	3.04457e-07	1.05682e-05
ENSG00000198075.10	263.296	-1.46253	0.285673	-5.11961	3.06172e-07	1.06184e-05
ENSG00000054938.16	44.8851	-1.78901	0.349455	-5.11943	3.06463e-07	1.06192e-05
ENSG00000286831.1	4.47733	-2.30129	0.449544	-5.11917	3.06879e-07	1.06244e-05
ENSG00000152117.17	1453.3	-0.85893	0.167863	-5.11686	3.10658e-07	1.07458e-05
ENSG00000224689.9	84.1724	2.06039	0.402701	5.11642	3.11389e-07	1.07617e-05
ENSG00000073792.16	269.402	-1.74933	0.341931	-5.11604	3.12011e-07	1.07738e-05
ENSG00000259236.1	5.3265	-1.61999	0.316686	-5.11543	3.13028e-07	1.07995e-05
ENSG00000156795.8	1047.11	0.727587	0.142247	5.11497	3.13799e-07	1.08166e-05
ENSG00000248124.8	118.534	-1.09629	0.214361	-5.11423	3.15029e-07	1.08472e-05
ENSG00000030304.14	23.5227	-2.46696	0.482384	-5.1141	3.15234e-07	1.08472e-05
ENSG00000164300.17	3945.24	0.815713	0.15951	5.11388	3.15612e-07	1.08508e-05
ENSG00000122873.12	1167.29	0.783668	0.15327	5.113	3.17087e-07	1.08921e-05
ENSG00000186854.11	127.156	-1.52719	0.298767	-5.11164	3.19371e-07	1.0961e-05
ENSG00000261786.1	25.7518	-2.33952	0.457752	-5.11089	3.2064e-07	1.09908e-05
ENSG00000182272.12	2020.28	-1.20017	0.23483	-5.1108	3.20794e-07	1.09908e-05
ENSG00000148341.18	5971.11	-0.869768	0.170235	-5.10921	3.23503e-07	1.1074e-05
ENSG00000183171.5	23.6996	-1.84864	0.361848	-5.1089	3.24037e-07	1.10827e-05
ENSG00000105717.14	83.8433	-1.28632	0.251855	-5.10738	3.26662e-07	1.11544e-05
ENSG00000171109.19	3262.58	0.560714	0.109786	5.10736	3.26695e-07	1.11544e-05
ENSG00000112195.9	27.0527	-1.82327	0.35706	-5.10635	3.28449e-07	1.12046e-05
ENSG00000164187.7	2095.16	0.867485	0.169896	5.10599	3.29063e-07	1.12159e-05
ENSG00000249064.1	6.67771	-1.60049	0.313679	-5.10232	3.35506e-07	1.14189e-05
ENSG00000078124.12	2062.83	0.906754	0.177716	5.10227	3.35596e-07	1.14189e-05
ENSG00000100298.16	56.9782	-1.45951	0.286081	-5.10175	3.3652e-07	1.14405e-05
ENSG00000168096.15	960.912	-0.790165	0.154923	-5.10036	3.39001e-07	1.1515e-05
ENSG00000118971.9	2163.88	-1.17921	0.231246	-5.09937	3.40787e-07	1.15624e-05
ENSG00000154429.11	1405.2	0.8141	0.159651	5.09926	3.4098e-07	1.15624e-05
ENSG00000184113.9	435.162	-1.45746	0.285874	-5.09825	3.42813e-07	1.16099e-05
ENSG00000102753.10	2876.04	0.582744	0.114305	5.09816	3.42967e-07	1.16099e-05
ENSG00000223843.5	8.97631	-1.76051	0.34535	-5.09776	3.43703e-07	1.16249e-05
ENSG00000070756.17	116696	0.972265	0.190796	5.09585	3.47184e-07	1.17326e-05
ENSG00000235480.1	4.0126	-1.85313	0.36374	-5.09466	3.49359e-07	1.1796e-05
ENSG00000117091.10	442.017	-1.50748	0.295913	-5.09434	3.49961e-07	1.18063e-05
ENSG00000103021.9	714.435	0.860449	0.168919	5.09384	3.50879e-07	1.18271e-05
ENSG00000261762.1	37.8257	1.5416	0.302677	5.09321	3.52044e-07	1.18563e-05
ENSG00000213316.10	112.558	-1.15339	0.226501	-5.09221	3.53914e-07	1.1906e-05
ENSG00000163219.12	880.921	-1.16404	0.228602	-5.09202	3.54269e-07	1.1906e-05
ENSG00000118308.15	237.175	-1.20318	0.236292	-5.09194	3.5442e-07	1.1906e-05
ENSG00000211899.10	32574.7	-2.26052	0.444014	-5.09109	3.56014e-07	1.19494e-05
ENSG00000107929.15	5687.89	0.484604	0.0952403	5.08823	3.6143e-07	1.21209e-05
ENSG00000056558.11	946.097	-1.12574	0.221282	-5.08735	3.63097e-07	1.21621e-05
ENSG00000072682.19	2926.51	0.808435	0.158914	5.08726	3.63273e-07	1.21621e-05
ENSG00000271380.1	6.08246	-1.36878	0.269082	-5.08685	3.64069e-07	1.21785e-05
ENSG00000243679.1	285.744	-0.695474	0.136725	-5.08665	3.64436e-07	1.21804e-05
ENSG00000262484.1	25.6473	-1.5888	0.312371	-5.08627	3.65175e-07	1.21949e-05
ENSG00000130812.10	19.8864	-1.19757	0.235516	-5.08488	3.67851e-07	1.22699e-05
ENSG00000260719.1	10.966	-2.04723	0.40262	-5.08479	3.6804e-07	1.22699e-05
ENSG00000124191.18	170.795	-1.32326	0.26028	-5.08398	3.69601e-07	1.23115e-05
ENSG00000251050.1	7.43291	-1.78825	0.351833	-5.08266	3.72188e-07	1.23873e-05
ENSG00000154719.14	1147.9	0.549165	0.108061	5.08198	3.7352e-07	1.24212e-05
ENSG00000105246.6	170.689	-1.43097	0.281614	-5.08131	3.74842e-07	1.24547e-05
ENSG00000198855.7	595.265	0.662153	0.13032	5.08098	3.75491e-07	1.24658e-05
ENSG00000250850.2	3.1032	-3.7561	0.739527	-5.07905	3.7932e-07	1.25824e-05
ENSG00000234771.3	403.281	-0.935306	0.184156	-5.07889	3.79654e-07	1.25829e-05
ENSG00000162148.11	111.717	-0.972217	0.191447	-5.07825	3.80926e-07	1.26145e-05
ENSG00000265929.1	9.04497	-3.52412	0.694068	-5.07749	3.82449e-07	1.26544e-05
ENSG00000260369.2	6.33385	-1.47382	0.290285	-5.07716	3.83115e-07	1.26658e-05
ENSG00000122432.18	25.9958	-1.08767	0.214255	-5.07652	3.84416e-07	1.26906e-05
ENSG00000120314.18	1748.84	0.452553	0.0891472	5.07647	3.8451e-07	1.26906e-05
ENSG00000273437.1	30.0006	-1.11482	0.219612	-5.07631	3.84825e-07	1.26906e-05
ENSG00000183484.12	410.775	-1.19169	0.234768	-5.07605	3.85368e-07	1.26979e-05
ENSG00000100079.7	164.735	-1.72535	0.339922	-5.07572	3.86031e-07	1.26987e-05
ENSG00000244468.1	2912.21	3.07191	0.605216	5.07572	3.86032e-07	1.26987e-05
ENSG00000162373.13	166.383	-1.24031	0.244402	-5.07485	3.87793e-07	1.2746e-05
ENSG00000261884.2	51.7689	-1.0459	0.206142	-5.07368	3.90194e-07	1.28143e-05
ENSG00000257221.4	18.7155	-1.65819	0.326839	-5.07341	3.90759e-07	1.28204e-05
ENSG00000156017.13	1337.21	0.589121	0.116122	5.07327	3.91029e-07	1.28204e-05
ENSG00000213903.9	606.652	-0.791986	0.156117	-5.07303	3.91532e-07	1.28263e-05
ENSG00000141258.13	2990.13	-0.752297	0.148328	-5.07183	3.94009e-07	1.28968e-05
ENSG00000211900.2	37.9871	-2.52445	0.497832	-5.07088	3.95977e-07	1.29505e-05
ENSG00000163710.9	241.903	-1.9498	0.384546	-5.0704	3.96987e-07	1.29728e-05
ENSG00000211753.4	32.4338	-2.12035	0.41823	-5.06982	3.98187e-07	1.29957e-05
ENSG00000148248.14	16197.2	0.560051	0.110469	5.06975	3.98343e-07	1.29957e-05
ENSG00000163898.10	1180.62	1.38079	0.272422	5.06859	4.00778e-07	1.30561e-05
ENSG00000229604.2	12.5171	-1.9866	0.391947	-5.06855	4.00855e-07	1.30561e-05
ENSG00000273245.1	11.1368	-1.71022	0.337453	-5.06802	4.01981e-07	1.30821e-05
ENSG00000229809.8	663.254	-0.886929	0.175011	-5.06784	4.02348e-07	1.30832e-05
ENSG00000172508.10	113.909	-1.03065	0.203384	-5.0675	4.03072e-07	1.3096e-05
ENSG00000269553.1	5.42018	-1.94536	0.383965	-5.0665	4.05205e-07	1.31536e-05
ENSG00000211666.2	3267.85	-2.10512	0.415514	-5.0663	4.05622e-07	1.31536e-05
ENSG00000254461.1	22.1797	-1.10816	0.218736	-5.0662	4.0584e-07	1.31536e-05
ENSG00000281571.2	9.59744	-1.6453	0.324785	-5.06582	4.06656e-07	1.31693e-05
ENSG00000164690.8	15.2797	2.25764	0.445679	5.06561	4.07093e-07	1.31727e-05
ENSG00000127663.15	7937.86	-0.961175	0.18976	-5.06522	4.07926e-07	1.31888e-05
ENSG00000100836.10	601.021	-0.811164	0.160204	-5.06331	4.12031e-07	1.33107e-05
ENSG00000211745.3	22.137	-2.06479	0.407838	-5.06278	4.13176e-07	1.33368e-05
ENSG00000128059.8	1524.87	0.717943	0.141835	5.06182	4.15283e-07	1.33939e-05
ENSG00000068745.15	4258.75	-0.514765	0.101713	-5.06095	4.17182e-07	1.34426e-05
ENSG00000204572.10	21.0271	-1.70848	0.337589	-5.06081	4.17471e-07	1.34426e-05
ENSG00000149313.11	2204.24	0.658864	0.130203	5.0603	4.186e-07	1.3468e-05
ENSG00000273749.5	9005.9	0.457285	0.0903829	5.05941	4.20551e-07	1.35198e-05
ENSG00000108094.16	2724.33	0.492712	0.0973916	5.05908	4.21284e-07	1.35324e-05
ENSG00000184371.14	2657.79	-1.00805	0.19929	-5.05819	4.23249e-07	1.35844e-05
ENSG00000220785.7	203.787	-1.04931	0.207469	-5.05767	4.24416e-07	1.36109e-05
ENSG00000249690.1	5.25054	-4.14473	0.819638	-5.05678	4.26403e-07	1.36635e-05
ENSG00000225075.1	7.3641	-1.36688	0.270334	-5.05625	4.27578e-07	1.36901e-05
ENSG00000067248.10	3368.32	0.585009	0.115723	5.05527	4.29781e-07	1.37495e-05
ENSG00000186118.9	8.50894	-1.23999	0.245357	-5.05382	4.3307e-07	1.38436e-05
ENSG00000250075.7	11.5373	-1.67142	0.33074	-5.05357	4.33638e-07	1.38505e-05
ENSG00000084234.18	35128.2	0.84092	0.166438	5.05247	4.36141e-07	1.39192e-05
ENSG00000186265.10	148.148	-2.03841	0.403518	-5.05161	4.38093e-07	1.39703e-05
ENSG00000230099.2	20.2288	-1.9847	0.392942	-5.05087	4.39809e-07	1.39989e-05
ENSG00000232079.7	14.0595	-2.29167	0.453717	-5.05087	4.39813e-07	1.39989e-05
ENSG00000279133.1	99.3932	-1.19343	0.236291	-5.05069	4.40227e-07	1.39989e-05
ENSG00000162650.16	340.359	-0.810042	0.160389	-5.05049	4.40672e-07	1.39989e-05
ENSG00000284376.1	2.90468	-4.42069	0.875315	-5.0504	4.40889e-07	1.39989e-05
ENSG00000174886.14	405.168	-0.93535	0.185207	-5.0503	4.4111e-07	1.39989e-05
ENSG00000244125.1	50.5322	-4.50403	0.891906	-5.0499	4.42049e-07	1.40175e-05
ENSG00000060491.16	3011	-0.804489	0.159381	-5.04759	4.47429e-07	1.41767e-05
ENSG00000164406.8	51.5099	-1.13092	0.22413	-5.04581	4.51603e-07	1.42975e-05
ENSG00000074695.6	11624.7	0.642524	0.127345	5.04554	4.52232e-07	1.42976e-05
ENSG00000111231.9	1221.17	0.534931	0.106021	5.0455	4.52326e-07	1.42976e-05
ENSG00000162438.12	4.40544	-1.88292	0.373271	-5.04437	4.55028e-07	1.43675e-05
ENSG00000136738.15	1597.44	0.51998	0.103083	5.04427	4.55266e-07	1.43675e-05
ENSG00000180644.8	443.774	-1.64059	0.325293	-5.04342	4.57273e-07	1.44194e-05
ENSG00000242600.8	10.3574	-1.61771	0.320824	-5.04235	4.59854e-07	1.44892e-05
ENSG00000086730.17	736.029	-0.955259	0.189461	-5.04199	4.60715e-07	1.45048e-05
ENSG00000131203.13	879.93	-1.99524	0.395819	-5.04079	4.63617e-07	1.45846e-05
ENSG00000246366.6	18.8741	-1.37225	0.272309	-5.0393	4.67243e-07	1.4687e-05
ENSG00000010072.16	944.399	0.587463	0.116589	5.03875	4.68587e-07	1.47176e-05
ENSG00000198682.13	4388.78	1.7148	0.340416	5.03735	4.72017e-07	1.48136e-05
ENSG00000173727.12	238.817	1.42361	0.282676	5.03619	4.74881e-07	1.48916e-05
ENSG00000135018.14	9671.88	0.503106	0.0999098	5.03561	4.76339e-07	1.49255e-05
ENSG00000160716.6	204.347	2.23456	0.443787	5.0352	4.77341e-07	1.49451e-05
ENSG00000165389.7	4365.96	0.895331	0.177858	5.03395	4.80472e-07	1.50313e-05
ENSG00000163655.16	6428.72	0.566618	0.112573	5.03336	4.81965e-07	1.50661e-05
ENSG00000146285.14	163.572	-1.83429	0.364535	-5.03188	4.85703e-07	1.51709e-05
ENSG00000213139.8	85.9737	-0.745427	0.148146	-5.03171	4.86132e-07	1.51724e-05
ENSG00000169696.16	1926.82	-0.852186	0.169378	-5.03127	4.87245e-07	1.51951e-05
ENSG00000123505.19	5801.64	0.951082	0.189054	5.03074	4.8858e-07	1.52248e-05
ENSG00000251791.1	57.0818	-2.5301	0.502955	-5.03047	4.89285e-07	1.52324e-05
ENSG00000227945.1	2.92339	-2.49176	0.495346	-5.03035	4.89595e-07	1.52324e-05
ENSG00000181029.9	73.6125	-1.11857	0.222411	-5.02927	4.92359e-07	1.53064e-05
ENSG00000172071.14	2112.3	0.628512	0.125005	5.02791	4.95866e-07	1.54034e-05
ENSG00000284633.1	19.7002	-1.21293	0.241276	-5.02713	4.97865e-07	1.54463e-05
ENSG00000223865.11	10688.7	-1.20386	0.239475	-5.02707	4.98028e-07	1.54463e-05
ENSG00000170027.7	14097.4	0.548946	0.109205	5.02676	4.9883e-07	1.5459e-05
ENSG00000271869.1	42.1794	-1.17221	0.233207	-5.02648	4.99554e-07	1.54694e-05
ENSG00000164088.18	1124.19	-0.661501	0.13165	-5.0247	5.04223e-07	1.56018e-05
ENSG00000066084.13	5130.17	0.723787	0.144064	5.02405	5.05921e-07	1.56421e-05
ENSG00000253831.3	10.7443	-2.72597	0.54275	-5.02252	5.09966e-07	1.57548e-05
ENSG00000104970.11	4.82651	-1.95542	0.389349	-5.02229	5.10599e-07	1.57621e-05
ENSG00000275791.1	16.5216	-2.07274	0.412764	-5.02159	5.12442e-07	1.58067e-05
ENSG00000240291.1	68.4522	-0.95129	0.189453	-5.02123	5.13404e-07	1.5824e-05
ENSG00000237328.1	3.78981	-3.16177	0.630311	-5.01621	5.2701e-07	1.62225e-05
ENSG00000188917.15	1406.67	0.451325	0.0899742	5.01616	5.27152e-07	1.62225e-05
ENSG00000111536.5	3.12366	-2.91736	0.581616	-5.01596	5.27697e-07	1.62267e-05
ENSG00000250634.6	5.8091	-2.39644	0.477832	-5.01523	5.29711e-07	1.6276e-05
ENSG00000249816.7	45.1905	2.12489	0.423719	5.01486	5.30716e-07	1.62942e-05
ENSG00000173818.17	1168.7	-0.867698	0.173043	-5.01434	5.3216e-07	1.63259e-05
ENSG00000108107.15	35687.3	-0.943585	0.188192	-5.01395	5.33233e-07	1.63462e-05
ENSG00000224531.6	1053.16	0.544752	0.108664	5.01319	5.35354e-07	1.63985e-05
ENSG00000224822.1	5.31104	-2.28557	0.455946	-5.01281	5.36404e-07	1.64179e-05
ENSG00000261408.7	15.6089	-1.15161	0.2298	-5.01136	5.40471e-07	1.6525e-05
ENSG00000184992.13	2494.56	0.813526	0.162339	5.01126	5.40737e-07	1.6525e-05
ENSG00000152422.16	496.231	0.502186	0.100238	5.00994	5.44475e-07	1.66264e-05
ENSG00000232412.1	7.89523	-1.29819	0.259148	-5.00946	5.45839e-07	1.66552e-05
ENSG00000240219.1	92.4432	-1.35072	0.269646	-5.00925	5.46421e-07	1.66602e-05
ENSG00000273137.1	29.496	-1.01998	0.203635	-5.00887	5.47509e-07	1.66805e-05
ENSG00000269194.1	1.87448	-1.65264	0.329952	-5.00872	5.47945e-07	1.66809e-05
ENSG00000228727.9	13.674	-1.50654	0.300802	-5.00842	5.48779e-07	1.66935e-05
ENSG00000286159.1	16.378	-2.03022	0.405479	-5.00697	5.52923e-07	1.68066e-05
ENSG00000174500.13	249.076	-1.32872	0.265408	-5.00633	5.54765e-07	1.68429e-05
ENSG00000213722.10	5123.23	-0.929299	0.185627	-5.00626	5.54967e-07	1.68429e-05
ENSG00000278231.1	23.3069	-1.37815	0.275346	-5.00516	5.5815e-07	1.69266e-05
ENSG00000234740.1	7.7049	-1.74573	0.348796	-5.00501	5.58603e-07	1.69273e-05
ENSG00000104687.14	4940.96	0.952484	0.190346	5.00395	5.61678e-07	1.70075e-05
ENSG00000230257.5	9.06993	-3.03734	0.607076	-5.00322	5.63796e-07	1.70586e-05
ENSG00000102057.10	182.317	-0.900167	0.179932	-5.00281	5.64999e-07	1.70819e-05
ENSG00000230155.6	5.11058	-1.49046	0.297939	-5.00256	5.65727e-07	1.70909e-05
ENSG00000225079.2	25.0968	-1.80774	0.361438	-5.00153	5.68772e-07	1.71698e-05
ENSG00000099899.15	1489.71	-0.751651	0.150299	-5.00103	5.70259e-07	1.72016e-05
ENSG00000243802.2	13.6921	-1.35316	0.270671	-4.99928	5.75439e-07	1.73446e-05
ENSG00000115946.8	1581.67	0.48486	0.0970046	4.99832	5.78315e-07	1.74181e-05
ENSG00000165887.12	13.5156	-1.596	0.319436	-4.99632	5.84361e-07	1.75866e-05
ENSG00000113389.16	1117.77	1.93484	0.387265	4.99617	5.84798e-07	1.75866e-05
ENSG00000160307.10	313.058	-1.99491	0.39935	-4.99539	5.87171e-07	1.76445e-05
ENSG00000233308.2	5.82795	-3.04464	0.609593	-4.99456	5.89715e-07	1.77075e-05
ENSG00000267251.2	96.4239	-1.7554	0.35154	-4.99344	5.93129e-07	1.77837e-05
ENSG00000258317.1	9.97779	-1.49798	0.29999	-4.99343	5.9315e-07	1.77837e-05
ENSG00000181192.12	4928	0.753276	0.150919	4.99124	5.99923e-07	1.79732e-05
ENSG00000206417.8	156.138	-1.03434	0.207247	-4.99084	6.01181e-07	1.79973e-05
ENSG00000115592.11	15.1959	2.923	0.585752	4.99016	6.03287e-07	1.80467e-05
ENSG00000072135.13	5144.33	-0.564943	0.113225	-4.98958	6.05116e-07	1.80877e-05
ENSG00000212402.1	5.73515	-2.81393	0.564006	-4.98919	6.06322e-07	1.81101e-05
ENSG00000215301.11	19802.3	0.405306	0.0812445	4.98872	6.07792e-07	1.81403e-05
ENSG00000279825.1	2.92276	-2.14223	0.429442	-4.98841	6.08785e-07	1.81563e-05
ENSG00000273076.1	8.91785	-1.25163	0.25097	-4.98717	6.12689e-07	1.8259e-05
ENSG00000278030.1	40.1454	-1.78051	0.357117	-4.98577	6.17147e-07	1.8378e-05
ENSG00000226080.1	45.2825	2.99812	0.601377	4.98542	6.18266e-07	1.83975e-05
ENSG00000276231.5	131.307	-0.860803	0.172672	-4.98518	6.19043e-07	1.84068e-05
ENSG00000128563.13	1474.15	-0.599443	0.120281	-4.98368	6.23854e-07	1.85359e-05
ENSG00000082497.12	3289.72	1.00012	0.200725	4.98257	6.27469e-07	1.86293e-05
ENSG00000198400.12	34.1378	-1.06063	0.212905	-4.98171	6.30244e-07	1.86977e-05
ENSG00000236456.1	40.8206	0.916137	0.183935	4.98077	6.33333e-07	1.87753e-05
ENSG00000231105.2	20.8006	-1.39292	0.279679	-4.98042	6.34477e-07	1.87951e-05
ENSG00000188186.10	3519.78	-0.970628	0.194937	-4.97919	6.38501e-07	1.88952e-05
ENSG00000250722.6	2893.83	1.21064	0.243144	4.9791	6.3881e-07	1.88952e-05
ENSG00000205765.9	2836.14	0.517974	0.104047	4.97828	6.41528e-07	1.89615e-05
ENSG00000138594.14	4224.6	0.610938	0.122736	4.97764	6.4364e-07	1.90097e-05
ENSG00000117906.14	3983.23	0.700019	0.140653	4.97692	6.46027e-07	1.9066e-05
ENSG00000266256.3	102.467	-1.81569	0.364859	-4.97642	6.47695e-07	1.9101e-05
ENSG00000225914.3	17.35	-1.63469	0.328506	-4.97614	6.48654e-07	1.9115e-05
ENSG00000167874.7	74.1529	-1.04701	0.210427	-4.97563	6.50359e-07	1.9151e-05
ENSG00000096996.16	256.648	-1.3601	0.273409	-4.97458	6.53908e-07	1.92412e-05
ENSG00000113643.9	4395.38	0.442745	0.0890066	4.97429	6.54862e-07	1.9255e-05
ENSG00000111642.16	2265.84	-0.705163	0.141778	-4.97372	6.56793e-07	1.92974e-05
ENSG00000116750.14	2873.02	0.620439	0.124767	4.97278	6.60011e-07	1.93776e-05
ENSG00000204482.11	506.884	-1.14697	0.230676	-4.97221	6.61941e-07	1.93966e-05
ENSG00000162585.17	1864.81	-0.846126	0.170172	-4.97219	6.62016e-07	1.93966e-05
ENSG00000227155.7	29.4562	-1.40911	0.2834	-4.97216	6.62126e-07	1.93966e-05
ENSG00000269958.1	328.388	-0.613329	0.12336	-4.97186	6.6315e-07	1.94122e-05
ENSG00000265787.2	27.5575	-2.0748	0.417403	-4.97074	6.66976e-07	1.95098e-05
ENSG00000180773.15	785.717	1.0104	0.203331	4.96924	6.7216e-07	1.96443e-05
ENSG00000233693.1	10.2824	-2.99757	0.60324	-4.96912	6.72567e-07	1.96443e-05
ENSG00000109943.9	105.574	-1.52911	0.307779	-4.9682	6.75773e-07	1.97234e-05
ENSG00000021488.13	22.1176	-1.01818	0.204973	-4.96737	6.78657e-07	1.97915e-05
ENSG00000206344.7	65.7129	-1.04454	0.210285	-4.96725	6.79105e-07	1.97915e-05
ENSG00000132437.18	31.17	2.53943	0.511275	4.96687	6.80435e-07	1.98157e-05
ENSG00000214093.3	8.4626	-1.14749	0.231107	-4.96519	6.86326e-07	1.99725e-05
ENSG00000269954.2	35.6021	-2.82373	0.568823	-4.96417	6.89962e-07	2.00636e-05
ENSG00000137070.18	356.01	-0.853279	0.171893	-4.96402	6.90489e-07	2.00642e-05
ENSG00000110048.12	5669.97	0.49906	0.100561	4.96278	6.94925e-07	2.01783e-05
ENSG00000207186.1	4.43212	-1.27813	0.257739	-4.95901	7.08532e-07	2.05583e-05
ENSG00000226051.8	10.7989	1.42364	0.287095	4.95879	7.09337e-07	2.05666e-05
ENSG00000215644.10	8.88489	-2.25505	0.454997	-4.95617	7.18952e-07	2.08024e-05
ENSG00000171223.6	5421.69	-0.952379	0.192161	-4.95615	7.1903e-07	2.08024e-05
ENSG00000106049.9	3111.44	0.603604	0.121789	4.95615	7.19044e-07	2.08024e-05
ENSG00000178927.18	4157.22	-0.623756	0.125893	-4.95467	7.24545e-07	2.094e-05
ENSG00000183155.5	1536.91	0.530051	0.106982	4.95458	7.24858e-07	2.094e-05
ENSG00000142634.13	3180.55	-0.877319	0.177141	-4.95266	7.32065e-07	2.11328e-05
ENSG00000073861.3	96.7237	-1.65531	0.334274	-4.95196	7.34697e-07	2.11933e-05
ENSG00000155097.12	5855.25	0.725454	0.146599	4.94857	7.47623e-07	2.15505e-05
ENSG00000204869.8	16.0654	-1.51813	0.306857	-4.94735	7.52292e-07	2.16693e-05
ENSG00000258365.1	25.4306	-1.19168	0.240885	-4.94708	7.5335e-07	2.1684e-05
ENSG00000125347.14	2596.46	-0.993076	0.200762	-4.94654	7.55438e-07	2.17283e-05
ENSG00000124486.13	12294.7	0.601895	0.121709	4.94537	7.59993e-07	2.18435e-05
ENSG00000257818.1	9.6749	-1.63046	0.329751	-4.94451	7.63356e-07	2.19242e-05
ENSG00000163293.12	269.181	1.53523	0.310508	4.94424	7.64414e-07	2.19387e-05
ENSG00000124333.16	2994.84	0.59565	0.120495	4.94335	7.67931e-07	2.20237e-05
ENSG00000229042.2	4.44944	-3.26214	0.659954	-4.94298	7.6936e-07	2.20487e-05
ENSG00000235703.6	224.363	-1.28738	0.260458	-4.94277	7.70199e-07	2.20568e-05
ENSG00000285165.1	4.29776	-2.05718	0.416364	-4.94082	7.77944e-07	2.22625e-05
ENSG00000162882.15	217.959	-1.06009	0.214594	-4.93999	7.81261e-07	2.23412e-05
ENSG00000103522.16	311.086	-1.38108	0.279595	-4.93956	7.82986e-07	2.23744e-05
ENSG00000243795.1	8.0824	-1.53237	0.310362	-4.93737	7.91829e-07	2.26108e-05
ENSG00000276462.2	2.68979	-2.42549	0.491295	-4.93694	7.93585e-07	2.26446e-05
ENSG00000235016.1	44.0674	-0.951754	0.192792	-4.93668	7.94654e-07	2.26588e-05
ENSG00000124102.5	166.471	-2.92665	0.592857	-4.93653	7.95262e-07	2.26598e-05
ENSG00000169251.13	3612.24	0.588508	0.119277	4.93396	8.05771e-07	2.29427e-05
ENSG00000268964.3	15.9506	3.27862	0.664761	4.93202	8.13823e-07	2.31266e-05
ENSG00000232140.2	39.1424	1.48745	0.30159	4.93202	8.13857e-07	2.31266e-05
ENSG00000279357.1	8.37926	-1.27836	0.259198	-4.93199	8.1398e-07	2.31266e-05
ENSG00000163421.9	3.71435	-2.40465	0.487781	-4.92977	8.23257e-07	2.33734e-05
ENSG00000236213.2	16.3595	-1.84861	0.375051	-4.92896	8.26672e-07	2.34536e-05
ENSG00000105825.14	295.821	-1.87477	0.38042	-4.92815	8.30117e-07	2.35344e-05
ENSG00000275070.1	5.03524	-1.40162	0.284435	-4.92772	8.31967e-07	2.35539e-05
ENSG00000136052.9	930.268	0.944347	0.19164	4.92771	8.31994e-07	2.35539e-05
ENSG00000231367.6	174.173	-1.93809	0.393498	-4.9253	8.4232e-07	2.38292e-05
ENSG00000141741.12	5645.04	1.60999	0.326935	4.9245	8.45767e-07	2.39097e-05
ENSG00000121749.15	3094.33	0.509848	0.103541	4.92409	8.47523e-07	2.39422e-05
ENSG00000171953.16	652.348	-0.658492	0.133785	-4.92202	8.56552e-07	2.41611e-05
ENSG00000279254.1	18.0065	-1.43858	0.292284	-4.92187	8.57218e-07	2.41611e-05
ENSG00000090971.5	1183.37	-1.04024	0.211355	-4.92177	8.57658e-07	2.41611e-05
ENSG00000235027.1	19.6404	-1.45348	0.295317	-4.92176	8.57713e-07	2.41611e-05
ENSG00000277778.2	30.6429	-1.40563	0.285645	-4.92089	8.61524e-07	2.42513e-05
ENSG00000179057.14	125.723	1.3656	0.277553	4.92016	8.64749e-07	2.43248e-05
ENSG00000168374.11	14484.4	0.5437	0.110538	4.91868	8.71291e-07	2.44814e-05
ENSG00000118046.16	2986.38	-0.747991	0.152073	-4.91862	8.71553e-07	2.44814e-05
ENSG00000237037.9	100.519	-0.638709	0.129862	-4.91835	8.72747e-07	2.44975e-05
ENSG00000175550.8	4792.79	-1.1237	0.228538	-4.91689	8.79278e-07	2.46634e-05
ENSG00000172000.7	84.8816	2.0829	0.423655	4.91651	8.81008e-07	2.46944e-05
ENSG00000101049.17	66.108	-1.28407	0.261195	-4.91611	8.82807e-07	2.47273e-05
ENSG00000267834.1	14.3802	-1.43517	0.291998	-4.915	8.87806e-07	2.48498e-05
ENSG00000250942.1	36.5702	-2.52082	0.513173	-4.91223	9.00477e-07	2.51867e-05
ENSG00000073050.12	1781.43	-0.615408	0.125305	-4.91128	9.04836e-07	2.52907e-05
ENSG00000125458.7	602.043	-1.04849	0.213517	-4.91058	9.08095e-07	2.53639e-05
ENSG00000198298.13	297.989	0.812037	0.16538	4.91014	9.10137e-07	2.5403e-05
ENSG00000287100.1	12.8301	-1.64517	0.335091	-4.90961	9.1257e-07	2.5453e-05
ENSG00000185101.13	1289.13	-1.20586	0.245636	-4.90911	9.14927e-07	2.55008e-05
ENSG00000139211.7	3893.09	1.69057	0.344407	4.90865	9.17076e-07	2.55427e-05
ENSG00000225194.3	24.5634	-2.04999	0.417735	-4.9074	9.22929e-07	2.56824e-05
ENSG00000196850.6	1621.16	0.540222	0.110085	4.9073	9.23388e-07	2.56824e-05
ENSG00000168970.22	124.405	-0.99862	0.203505	-4.9071	9.24329e-07	2.56905e-05
ENSG00000277089.4	3.82591	-2.47019	0.503505	-4.90598	9.29603e-07	2.5819e-05
ENSG00000228495.2	15.2469	-1.50875	0.307562	-4.9055	9.31875e-07	2.58639e-05
ENSG00000287032.1	5.7887	-1.65041	0.336558	-4.90379	9.40066e-07	2.6073e-05
ENSG00000158477.7	78.7876	-2.41075	0.491706	-4.90282	9.44697e-07	2.61831e-05
ENSG00000199466.1	2.64297	-2.446	0.499014	-4.90167	9.50242e-07	2.63184e-05
ENSG00000249806.1	3.0504	-2.74211	0.559475	-4.90122	9.52419e-07	2.63602e-05
ENSG00000139540.12	10.4102	-1.14566	0.233866	-4.89876	9.64413e-07	2.66736e-05
ENSG00000254811.5	10.307	4.85289	0.991001	4.89696	9.73291e-07	2.69003e-05
ENSG00000273729.1	51.4455	-0.9403	0.192108	-4.89465	9.8481e-07	2.71997e-05
ENSG00000078814.17	88.3709	-1.1219	0.229218	-4.89447	9.85734e-07	2.72063e-05
ENSG00000205482.9	22.5558	-0.918043	0.187613	-4.89328	9.91691e-07	2.73516e-05
ENSG00000095464.10	26.877	-1.11854	0.228629	-4.89239	9.96182e-07	2.74564e-05
ENSG00000169330.9	229.087	1.26806	0.259221	4.8918	9.99156e-07	2.75192e-05
ENSG00000178162.8	109.573	-2.25534	0.461149	-4.8907	1.00476e-06	2.76544e-05
ENSG00000250620.2	17.2077	-1.98486	0.405944	-4.88951	1.01089e-06	2.78036e-05
ENSG00000100652.5	6.26559	-1.83169	0.374632	-4.88932	1.01186e-06	2.7811e-05
ENSG00000271503.6	3158.49	-1.62967	0.333344	-4.88886	1.01424e-06	2.78472e-05
ENSG00000137078.9	235.916	-1.78187	0.364481	-4.88879	1.01458e-06	2.78472e-05
ENSG00000254505.11	53.1449	-0.73581	0.150527	-4.88822	1.01752e-06	2.79085e-05
ENSG00000142961.15	902.154	-0.552793	0.113092	-4.88797	1.0188e-06	2.79243e-05
ENSG00000175106.17	136.174	-0.948535	0.194089	-4.88711	1.02325e-06	2.80087e-05
ENSG00000268650.3	5.47791	-1.55361	0.317901	-4.88711	1.02329e-06	2.80087e-05
ENSG00000159788.19	1896.03	-0.62737	0.128391	-4.88641	1.02693e-06	2.8082e-05
ENSG00000223534.1	32.9341	-1.57501	0.32233	-4.88632	1.02739e-06	2.8082e-05
ENSG00000259306.2	5.02102	4.4016	0.901004	4.88522	1.03315e-06	2.822e-05
ENSG00000138614.15	3148.46	0.506233	0.103637	4.88466	1.03606e-06	2.82799e-05
ENSG00000076944.16	2411.44	-0.98114	0.200907	-4.88354	1.04197e-06	2.84218e-05
ENSG00000238266.2	23.3875	2.91829	0.597651	4.88293	1.0452e-06	2.84859e-05
ENSG00000182179.13	2405.84	-0.91138	0.18665	-4.88283	1.04576e-06	2.84859e-05
ENSG00000203865.11	394.227	-0.854722	0.175127	-4.88059	1.05767e-06	2.87905e-05
ENSG00000177889.10	5705.84	0.46068	0.0943927	4.88046	1.0584e-06	2.87905e-05
ENSG00000103591.13	5169.41	0.622404	0.127588	4.87825	1.07032e-06	2.90949e-05
ENSG00000263465.4	2776.32	0.642835	0.131803	4.87723	1.07589e-06	2.9226e-05
ENSG00000261971.8	522.566	-1.11842	0.229352	-4.87642	1.08027e-06	2.93249e-05
ENSG00000277494.2	116.53	-1.44051	0.295473	-4.87526	1.08663e-06	2.94776e-05
ENSG00000248125.2	3.05334	-2.97755	0.61095	-4.87365	1.09556e-06	2.96994e-05
ENSG00000160226.16	249.542	-0.808713	0.165944	-4.8734	1.09692e-06	2.97158e-05
ENSG00000183918.17	277.172	-1.80308	0.370135	-4.87142	1.10799e-06	2.99952e-05
ENSG00000100055.21	959.277	-1.01275	0.207915	-4.87096	1.11056e-06	3.00242e-05
ENSG00000248222.5	6.24752	-3.27409	0.672165	-4.87096	1.11057e-06	3.00242e-05
ENSG00000156873.16	1960.05	-0.641091	0.131627	-4.87051	1.11309e-06	3.00716e-05
ENSG00000081059.20	1268.34	-1.31081	0.269157	-4.87007	1.11558e-06	3.01162e-05
ENSG00000110723.12	875.28	0.886765	0.182089	4.86995	1.11626e-06	3.01162e-05
ENSG00000110944.9	88.3741	-1.04543	0.214684	-4.86959	1.1183e-06	3.01507e-05
ENSG00000151503.13	2536.59	0.70196	0.144188	4.86838	1.12519e-06	3.03157e-05
ENSG00000112893.9	3735.08	0.783921	0.161049	4.8676	1.1296e-06	3.04139e-05
ENSG00000100307.13	1260.12	-0.844359	0.173479	-4.8672	1.13193e-06	3.04559e-05
ENSG00000139192.12	1689.22	-0.841957	0.173022	-4.86618	1.13773e-06	3.05738e-05
ENSG00000215196.5	19.489	-1.78697	0.367224	-4.86616	1.13785e-06	3.05738e-05
ENSG00000241158.7	26.2026	-1.47695	0.303551	-4.86557	1.14127e-06	3.06157e-05
ENSG00000266980.1	3.71443	-1.76733	0.363233	-4.86554	1.14143e-06	3.06157e-05
ENSG00000135441.7	248.527	-0.863079	0.177388	-4.86549	1.14173e-06	3.06157e-05
ENSG00000103342.13	13504.8	0.568967	0.116984	4.86363	1.15252e-06	3.08841e-05
ENSG00000287109.1	8.54633	-2.03315	0.418102	-4.86282	1.15724e-06	3.09896e-05
ENSG00000268400.5	1.15994	-2.34922	0.483271	-4.86108	1.16745e-06	3.12419e-05
ENSG00000248487.9	271.791	-0.921456	0.189603	-4.85993	1.17425e-06	3.13956e-05
ENSG00000223770.5	3.47085	-3.48088	0.716254	-4.85984	1.17478e-06	3.13956e-05
ENSG00000104880.18	1552.79	-0.588096	0.121018	-4.85958	1.17636e-06	3.14166e-05
ENSG00000067836.13	914.038	-0.969471	0.199515	-4.85913	1.17902e-06	3.14665e-05
ENSG00000103111.15	2295.9	0.581532	0.11969	4.85866	1.18183e-06	3.15203e-05
ENSG00000114573.10	6125.34	0.547678	0.112742	4.8578	1.18694e-06	3.16353e-05
ENSG00000255438.2	12.6342	-2.20128	0.453205	-4.85714	1.19093e-06	3.17202e-05
ENSG00000078596.11	995.902	-1.18868	0.244745	-4.85681	1.19291e-06	3.17516e-05
ENSG00000101017.14	779.943	-1.10025	0.226614	-4.85517	1.20281e-06	3.19937e-05
ENSG00000234936.1	13.6174	-1.15034	0.236988	-4.85401	1.20988e-06	3.21469e-05
ENSG00000269834.6	428.944	-1.0032	0.206677	-4.85396	1.2102e-06	3.21469e-05
ENSG00000275476.1	14.8241	-1.42172	0.29291	-4.85378	1.2113e-06	3.21546e-05
ENSG00000189269.12	14.0986	-1.14302	0.23553	-4.85296	1.21634e-06	3.2252e-05
ENSG00000111711.10	2989.01	0.675505	0.139196	4.85292	1.2166e-06	3.2252e-05
ENSG00000211750.2	8.6685	-2.09504	0.431756	-4.85236	1.21999e-06	3.23203e-05
ENSG00000102468.11	28.7491	-1.77884	0.366613	-4.8521	1.22159e-06	3.2341e-05
ENSG00000135502.19	3.57288	-2.44619	0.504188	-4.85173	1.22387e-06	3.23797e-05
ENSG00000034693.15	728.902	0.669516	0.138023	4.85076	1.22989e-06	3.24806e-05
ENSG00000280758.1	7.85814	-1.06227	0.218991	-4.85073	1.23007e-06	3.24806e-05
ENSG00000009335.18	6821.9	0.515613	0.106296	4.85072	1.23014e-06	3.24806e-05
ENSG00000234800.2	2.89322	3.32418	0.685434	4.84975	1.23618e-06	3.26183e-05
ENSG00000144381.18	23356	0.70104	0.14458	4.84879	1.24218e-06	3.27498e-05
ENSG00000166900.17	2995.86	0.61035	0.125879	4.84869	1.24282e-06	3.27498e-05
ENSG00000207008.1	3.82035	-2.41217	0.497549	-4.84812	1.2464e-06	3.2815e-05
ENSG00000172167.8	680.819	1.00171	0.206622	4.84803	1.24695e-06	3.2815e-05
ENSG00000179564.4	4.6361	-1.7451	0.360002	-4.84749	1.25034e-06	3.28824e-05
ENSG00000105327.18	645.074	-0.96389	0.198892	-4.8463	1.25787e-06	3.30586e-05
ENSG00000101082.14	212.01	-1.46786	0.302894	-4.84611	1.25904e-06	3.30672e-05
ENSG00000130751.10	92.7999	-1.19912	0.247462	-4.84566	1.26189e-06	3.31201e-05
ENSG00000285210.1	31.9802	-1.34432	0.277504	-4.84433	1.27038e-06	3.33209e-05
ENSG00000102471.14	1872.7	0.611158	0.126168	4.84402	1.27239e-06	3.33515e-05
ENSG00000271895.2	31.4301	-0.921236	0.190268	-4.84177	1.28686e-06	3.37085e-05
ENSG00000134375.11	4776.63	0.592879	0.122473	4.8409	1.29249e-06	3.38337e-05
ENSG00000105514.8	3383.27	0.865698	0.178835	4.84077	1.29335e-06	3.38337e-05
ENSG00000230454.1	106.342	-1.17308	0.24235	-4.84045	1.29547e-06	3.38668e-05
ENSG00000012171.20	2027.69	-1.61168	0.333022	-4.83956	1.30129e-06	3.39966e-05
ENSG00000126895.15	41.0032	-1.36887	0.282869	-4.83925	1.30332e-06	3.40272e-05
ENSG00000163508.13	207.509	-1.72993	0.357548	-4.8383	1.30953e-06	3.41669e-05
ENSG00000176845.13	1610.72	-0.907008	0.187477	-4.83797	1.31175e-06	3.42021e-05
ENSG00000137814.12	1139.69	0.485063	0.100271	4.83753	1.31464e-06	3.42551e-05
ENSG00000125977.7	5762.67	0.544329	0.112533	4.83704	1.31787e-06	3.43165e-05
ENSG00000160963.14	82.2107	-2.15595	0.445738	-4.83682	1.31936e-06	3.43328e-05
ENSG00000224067.2	4.96891	-1.49538	0.30919	-4.83644	1.32183e-06	3.43684e-05
ENSG00000110955.9	32687	0.63303	0.13089	4.83635	1.32246e-06	3.43684e-05
ENSG00000167005.14	5971.67	0.578842	0.119727	4.83467	1.33365e-06	3.46364e-05
ENSG00000270930.1	81.6409	-2.46292	0.509489	-4.83409	1.33753e-06	3.47144e-05
ENSG00000160219.12	264.827	-0.980717	0.202973	-4.83176	1.35333e-06	3.51014e-05
ENSG00000105662.16	1162.9	-0.655679	0.135709	-4.83151	1.35504e-06	3.5123e-05
ENSG00000274752.1	8.39605	-2.10828	0.43644	-4.83064	1.36098e-06	3.52537e-05
ENSG00000095370.20	858.7	-0.898795	0.186085	-4.83002	1.36522e-06	3.53404e-05
ENSG00000009694.13	48.5689	-1.5562	0.322226	-4.82951	1.36868e-06	3.53921e-05
ENSG00000226054.2	80.4664	0.863803	0.178861	4.82947	1.369e-06	3.53921e-05
ENSG00000164520.11	38.7909	1.65623	0.34299	4.82882	1.37346e-06	3.54841e-05
ENSG00000169139.12	4296.11	0.701088	0.145249	4.82678	1.38756e-06	3.5825e-05
ENSG00000179388.9	1232.7	-1.57632	0.32662	-4.82617	1.39184e-06	3.59123e-05
ENSG00000163794.6	59.8935	-1.09012	0.225915	-4.82535	1.39761e-06	3.60376e-05
ENSG00000188305.6	22.9134	-0.987089	0.204605	-4.82436	1.40453e-06	3.61858e-05
ENSG00000229944.3	13.6262	0.882415	0.182912	4.82427	1.40519e-06	3.61858e-05
ENSG00000229833.10	83.2841	-0.929997	0.19279	-4.8239	1.40781e-06	3.623e-05
ENSG00000204277.1	6.08012	-1.88614	0.391068	-4.82306	1.41372e-06	3.63582e-05
ENSG00000241288.8	218.145	-1.46834	0.304467	-4.82265	1.41663e-06	3.64094e-05
ENSG00000061676.15	11679.6	0.619585	0.128491	4.82199	1.42131e-06	3.6506e-05
ENSG00000272374.1	89.4861	-1.12877	0.234105	-4.82163	1.42393e-06	3.65497e-05
ENSG00000258331.1	6.16687	-2.11339	0.438338	-4.82136	1.42581e-06	3.65583e-05
ENSG00000105711.13	455.453	-1.03399	0.214464	-4.8213	1.42629e-06	3.65583e-05
ENSG00000279277.2	33.6007	-1.21351	0.251702	-4.82119	1.42703e-06	3.65583e-05
ENSG00000211597.2	40.3394	-1.98943	0.41266	-4.82099	1.42849e-06	3.65719e-05
ENSG00000172239.14	4150.66	0.492415	0.102165	4.81981	1.43691e-06	3.67639e-05
ENSG00000239820.3	1.1886	-2.41733	0.501561	-4.81962	1.43829e-06	3.67753e-05
ENSG00000175426.11	273.733	2.2498	0.466824	4.81936	1.44019e-06	3.68001e-05
ENSG00000207233.1	2.39429	-3.1948	0.663219	-4.81712	1.45648e-06	3.71922e-05
ENSG00000228315.12	113.498	-0.821007	0.170491	-4.81556	1.46791e-06	3.746e-05
ENSG00000279196.1	11.5383	-0.986789	0.204949	-4.81481	1.4734e-06	3.75759e-05
ENSG00000151135.10	4611.07	0.635911	0.132096	4.81402	1.47926e-06	3.7701e-05
ENSG00000123213.23	2642.91	0.609092	0.126546	4.81322	1.48521e-06	3.78284e-05
ENSG00000185274.12	144.462	1.66609	0.346339	4.81057	1.50504e-06	3.83088e-05
ENSG00000159761.15	86.7909	-1.14066	0.237131	-4.81024	1.5075e-06	3.83338e-05
ENSG00000156475.18	57.5094	-1.22916	0.255534	-4.81018	1.50795e-06	3.83338e-05
ENSG00000126266.3	3.7983	-2.6263	0.546044	-4.80969	1.51164e-06	3.84028e-05
ENSG00000172005.11	97.1191	-1.85717	0.386223	-4.80855	1.52031e-06	3.85983e-05
ENSG00000186517.14	1936.46	-1.0327	0.214795	-4.80781	1.5259e-06	3.87154e-05
ENSG00000255750.6	44.3336	-1.86502	0.388067	-4.80592	1.54041e-06	3.90586e-05
ENSG00000260179.1	11.757	-1.28097	0.266551	-4.8057	1.54212e-06	3.90736e-05
ENSG00000197172.10	26.366	5.33625	1.11043	4.80559	1.54298e-06	3.90736e-05
ENSG00000268189.2	37.4652	-1.16092	0.241589	-4.80535	1.54484e-06	3.90957e-05
ENSG00000275052.5	7827.89	0.475504	0.0989626	4.80488	1.54842e-06	3.91613e-05
ENSG00000211770.1	1.16193	-2.92456	0.608745	-4.80425	1.55333e-06	3.92604e-05
ENSG00000185338.6	234.625	-1.35437	0.281957	-4.80345	1.55951e-06	3.93916e-05
ENSG00000261159.1	38.2904	-1.19013	0.247842	-4.80197	1.57114e-06	3.96601e-05
ENSG00000103024.7	2961.61	-1.07449	0.223766	-4.80183	1.5722e-06	3.96616e-05
ENSG00000164609.10	3191.39	0.432959	0.0901814	4.80098	1.57895e-06	3.98064e-05
ENSG00000020922.13	1831.32	0.485251	0.101086	4.80037	1.58372e-06	3.99012e-05
ENSG00000008517.18	2656.19	-1.39367	0.290337	-4.80019	1.58517e-06	3.99123e-05
ENSG00000198846.6	255.574	-1.52155	0.31699	-4.79999	1.58674e-06	3.99266e-05
ENSG00000236385.1	7.9511	2.41295	0.502767	4.79935	1.59181e-06	4.00286e-05
ENSG00000111647.13	2003.83	0.68132	0.141968	4.7991	1.59378e-06	4.00527e-05
ENSG00000253708.1	1.96628	-1.83163	0.381683	-4.79881	1.5961e-06	4.00856e-05
ENSG00000215908.10	935.49	-0.781793	0.162955	-4.7976	1.60575e-06	4.03024e-05
ENSG00000107937.19	4439.97	0.654052	0.136343	4.7971	1.60979e-06	4.03783e-05
ENSG00000272696.1	19.7265	-0.909842	0.189693	-4.7964	1.61541e-06	4.04935e-05
ENSG00000248521.1	2.43307	-3.91288	0.815828	-4.79621	1.61697e-06	4.05072e-05
ENSG00000147443.13	405.427	-1.35653	0.282874	-4.79554	1.62236e-06	4.06164e-05
ENSG00000181074.4	7.83209	-1.87723	0.391497	-4.795	1.62674e-06	4.07004e-05
ENSG00000198677.12	5577.93	0.629011	0.131201	4.79427	1.63267e-06	4.08091e-05
ENSG00000110848.8	408.099	-1.43971	0.300301	-4.79421	1.63315e-06	4.08091e-05
ENSG00000152683.14	2627.61	0.492506	0.10275	4.79326	1.64094e-06	4.09779e-05
ENSG00000241563.4	8.01703	-1.22991	0.256632	-4.79249	1.6472e-06	4.11085e-05
ENSG00000211958.2	9.60034	-2.35603	0.491679	-4.7918	1.65293e-06	4.12254e-05
ENSG00000156170.13	2020.94	0.80999	0.169079	4.79059	1.66289e-06	4.14476e-05
ENSG00000124786.12	1694.87	0.44671	0.0932686	4.7895	1.67199e-06	4.16482e-05
ENSG00000258912.2	3.23778	-2.81031	0.58678	-4.78937	1.67305e-06	4.16486e-05
ENSG00000111684.11	968.68	0.830307	0.173376	4.78906	1.67567e-06	4.16874e-05
ENSG00000120896.13	3916.65	-0.875979	0.182924	-4.78876	1.67813e-06	4.17225e-05
ENSG00000260669.2	8.02345	-1.0651	0.222424	-4.78858	1.67964e-06	4.17339e-05
ENSG00000229932.3	31.588	0.972499	0.20314	4.78733	1.69015e-06	4.19687e-05
ENSG00000249685.1	14.9113	-1.11767	0.233488	-4.78684	1.69428e-06	4.20449e-05
ENSG00000168411.14	2821.71	0.615197	0.128562	4.78521	1.70813e-06	4.2362e-05
ENSG00000260236.1	51.9815	-0.735855	0.153788	-4.78487	1.71101e-06	4.2407e-05
ENSG00000162923.17	10600.9	0.517431	0.108154	4.7842	1.71671e-06	4.25215e-05
ENSG00000259772.6	53.1532	-1.56782	0.32772	-4.78403	1.71814e-06	4.25305e-05
ENSG00000124256.15	295.407	-1.48719	0.311018	-4.78168	1.73838e-06	4.30045e-05
ENSG00000143183.18	9096.22	0.551435	0.115336	4.78112	1.74324e-06	4.30978e-05
ENSG00000213222.3	161.446	-1.22672	0.256654	-4.77968	1.7557e-06	4.33781e-05
ENSG00000267366.1	33.2347	-1.77177	0.370697	-4.77956	1.75677e-06	4.33781e-05
ENSG00000154611.15	4.0787	-2.4549	0.513711	-4.77876	1.76382e-06	4.35252e-05
ENSG00000104408.11	20344.3	0.755084	0.158031	4.77807	1.76986e-06	4.36469e-05
ENSG00000272927.1	54.7152	-1.48441	0.310708	-4.77751	1.77481e-06	4.37189e-05
ENSG00000201098.1	40.5513	4.56827	0.956207	4.77749	1.77498e-06	4.37189e-05
ENSG00000196689.12	417.615	-0.643439	0.134685	-4.77736	1.77611e-06	4.37194e-05
ENSG00000128394.17	591.576	-0.917249	0.19201	-4.77708	1.77855e-06	4.37523e-05
ENSG00000248309.7	25.004	-1.44722	0.303043	-4.77564	1.79138e-06	4.40406e-05
ENSG00000264577.1	65.1377	-0.982862	0.205844	-4.77478	1.79902e-06	4.4201e-05
ENSG00000130813.18	853.355	-0.806821	0.168992	-4.7743	1.80332e-06	4.42501e-05
ENSG00000235481.3	14.3519	-1.42678	0.29885	-4.77426	1.80373e-06	4.42501e-05
ENSG00000279106.1	2.26521	-2.0847	0.436661	-4.77418	1.80437e-06	4.42501e-05
ENSG00000272588.1	24.4887	-1.45511	0.304815	-4.77376	1.80821e-06	4.43168e-05
ENSG00000279965.1	13.5578	-2.80509	0.587673	-4.77321	1.81313e-06	4.441e-05
ENSG00000137101.13	340.721	-1.23895	0.259619	-4.77217	1.82253e-06	4.46125e-05
ENSG00000275772.1	2.73694	-3.03438	0.635906	-4.77174	1.82645e-06	4.46809e-05
ENSG00000155393.13	1452.29	0.583064	0.122225	4.77043	1.83832e-06	4.49434e-05
ENSG00000276337.1	20.3608	-1.32296	0.277344	-4.77009	1.8414e-06	4.49911e-05
ENSG00000227345.8	1533.4	0.467882	0.0980974	4.76957	1.84624e-06	4.50815e-05
ENSG00000160999.10	345.107	-1.11494	0.233774	-4.76931	1.84863e-06	4.51119e-05
ENSG00000180438.15	105.329	2.1466	0.450206	4.76805	1.86016e-06	4.53655e-05
ENSG00000241666.2	11.0715	-2.15219	0.451407	-4.76774	1.86303e-06	4.54076e-05
ENSG00000198624.13	1249.08	-1.12588	0.23626	-4.76542	1.88459e-06	4.59048e-05
ENSG00000171004.18	464.877	1.94591	0.408413	4.76457	1.89258e-06	4.6071e-05
ENSG00000167363.14	1408.45	-1.0616	0.222882	-4.76308	1.90658e-06	4.63832e-05
ENSG00000161800.13	3254.24	0.771087	0.161916	4.76227	1.91425e-06	4.65414e-05
ENSG00000103978.16	6184.91	0.569991	0.119751	4.7598	1.93783e-06	4.70858e-05
ENSG00000271913.7	99.281	-0.809143	0.170022	-4.75904	1.94513e-06	4.72341e-05
ENSG00000149547.15	7834.59	0.63219	0.132863	4.75822	1.95305e-06	4.73374e-05
ENSG00000232629.9	1095.13	-1.62343	0.341186	-4.75818	1.95345e-06	4.73374e-05
ENSG00000106052.13	10141.8	0.491703	0.103339	4.75817	1.95358e-06	4.73374e-05
ENSG00000161513.12	1065.41	-1.13533	0.23861	-4.75811	1.95417e-06	4.73374e-05
ENSG00000267769.1	12.7119	-1.05285	0.221326	-4.75702	1.9647e-06	4.75636e-05
ENSG00000187984.13	59.971	-1.03919	0.218464	-4.75682	1.96669e-06	4.75826e-05
ENSG00000224557.7	84.5079	-1.59162	0.334706	-4.75527	1.98177e-06	4.79181e-05
ENSG00000163806.16	35.4475	-1.22651	0.257956	-4.75472	1.98717e-06	4.80194e-05
ENSG00000215067.10	138.699	-0.774088	0.162818	-4.7543	1.99133e-06	4.80905e-05
ENSG00000257058.1	7.86151	-1.14416	0.240681	-4.75385	1.99579e-06	4.81689e-05
ENSG00000272148.1	19.7053	-1.02396	0.215431	-4.75307	2.00355e-06	4.83267e-05
ENSG00000077522.14	107.942	2.18112	0.458959	4.75232	2.01092e-06	4.84595e-05
ENSG00000100335.15	2592	0.480863	0.101186	4.75227	2.0115e-06	4.84595e-05
ENSG00000007174.18	30.5841	-1.68368	0.354315	-4.75193	2.01485e-06	4.85063e-05
ENSG00000254098.1	15.114	-3.18083	0.66939	-4.75182	2.01589e-06	4.85063e-05
ENSG00000170759.11	15123.7	0.62778	0.132122	4.75152	2.0189e-06	4.85492e-05
ENSG00000238057.10	3.59418	-2.07523	0.436864	-4.75028	2.03134e-06	4.88187e-05
ENSG00000250155.2	47.3188	-1.68827	0.355513	-4.74883	2.04593e-06	4.91395e-05
ENSG00000238184.1	9.90147	-1.09673	0.230969	-4.74839	2.05044e-06	4.92181e-05
ENSG00000089692.9	520.033	-1.54484	0.325365	-4.74804	2.05398e-06	4.92732e-05
ENSG00000050393.11	2952.36	0.488635	0.102919	4.74775	2.05688e-06	4.92947e-05
ENSG00000156958.15	825.365	0.750564	0.15809	4.74771	2.05737e-06	4.92947e-05
ENSG00000160094.15	2110.96	-0.505299	0.106436	-4.74742	2.06023e-06	4.93335e-05
ENSG00000267119.1	12.7276	-1.19493	0.251763	-4.74627	2.07203e-06	4.9586e-05
ENSG00000185324.22	1904.46	-0.801766	0.168937	-4.74595	2.07526e-06	4.96333e-05
ENSG00000121644.19	4060.54	0.654727	0.137961	4.74576	2.07726e-06	4.96512e-05
ENSG00000287271.1	135.832	1.36572	0.287819	4.74505	2.08459e-06	4.97964e-05
ENSG00000265996.1	9.21134	-1.59011	0.335158	-4.74436	2.09166e-06	4.99275e-05
ENSG00000090776.6	1267.11	-0.808779	0.170475	-4.74427	2.0926e-06	4.99275e-05
ENSG00000174697.5	120.807	-2.23145	0.470375	-4.74398	2.09556e-06	4.9968e-05
ENSG00000279884.1	4.643	-2.35864	0.497238	-4.74347	2.10083e-06	5.00635e-05
ENSG00000187164.20	5446.79	0.681332	0.14365	4.74299	2.10588e-06	5.01535e-05
ENSG00000189377.9	1989.85	2.54248	0.536074	4.74277	2.1082e-06	5.01788e-05
ENSG00000258986.7	41.4113	2.85929	0.602946	4.7422	2.11413e-06	5.02896e-05
ENSG00000026036.22	98.0189	-1.00063	0.21104	-4.74144	2.12201e-06	5.04469e-05
ENSG00000270060.1	32.9708	-0.791569	0.166964	-4.74096	2.12712e-06	5.05379e-05
ENSG00000238246.1	7.60181	-2.12283	0.44778	-4.74077	2.12903e-06	5.0553e-05
ENSG00000131591.18	829.366	-0.70887	0.149536	-4.74045	2.13244e-06	5.05825e-05
ENSG00000272181.1	4.00608	-1.42577	0.30077	-4.74041	2.13283e-06	5.05825e-05
ENSG00000176083.18	193.448	-1.66012	0.350231	-4.74008	2.13631e-06	5.06348e-05
ENSG00000028137.19	2290.91	-1.03961	0.219333	-4.73987	2.13857e-06	5.0658e-05
ENSG00000277610.1	1.14423	-2.53506	0.534933	-4.73903	2.14748e-06	5.08197e-05
ENSG00000103769.10	13526	0.670548	0.141496	4.73898	2.14796e-06	5.08197e-05
ENSG00000101844.18	974.294	0.546392	0.115301	4.73884	2.14948e-06	5.08253e-05
ENSG00000200959.1	9.35541	-3.28044	0.692265	-4.73871	2.15085e-06	5.08274e-05
ENSG00000117597.18	2567.64	0.631499	0.13327	4.7385	2.15307e-06	5.08494e-05
ENSG00000211752.3	27.2448	-1.82516	0.385236	-4.73777	2.16079e-06	5.10014e-05
ENSG00000124205.18	147.281	-3.01845	0.637201	-4.73704	2.1686e-06	5.11553e-05
ENSG00000279149.1	8.11516	-1.58163	0.33392	-4.73654	2.17396e-06	5.12511e-05
ENSG00000100767.17	573.372	-1.05781	0.223363	-4.73583	2.18162e-06	5.13963e-05
ENSG00000261416.1	4.64409	-1.8432	0.389211	-4.73573	2.18271e-06	5.13963e-05
ENSG00000207175.1	4.65769	-2.29653	0.484991	-4.7352	2.18843e-06	5.15003e-05
ENSG00000236095.1	6.43679	-1.75004	0.369609	-4.73484	2.19227e-06	5.15601e-05
ENSG00000173992.9	1792.12	-0.921319	0.194621	-4.73393	2.20219e-06	5.17625e-05
ENSG00000122420.10	129.562	-1.62899	0.344132	-4.73362	2.20546e-06	5.18086e-05
ENSG00000230067.3	17.4816	1.15403	0.243829	4.73292	2.2131e-06	5.19572e-05
ENSG00000259088.1	15.2501	-0.99122	0.209504	-4.73127	2.23124e-06	5.23285e-05
ENSG00000226137.5	1670.35	-0.794937	0.168019	-4.73124	2.23155e-06	5.23285e-05
ENSG00000177494.6	102.723	-1.75457	0.370874	-4.7309	2.23529e-06	5.23852e-05
ENSG00000101417.12	2566.08	1.05366	0.222778	4.72966	2.249e-06	5.26754e-05
ENSG00000164946.20	186.027	-1.55157	0.328085	-4.72917	2.25441e-06	5.27569e-05
ENSG00000273384.1	4.46732	-1.4147	0.299148	-4.7291	2.25515e-06	5.27569e-05
ENSG00000166428.14	360.577	-1.29767	0.274562	-4.72631	2.28636e-06	5.34554e-05
ENSG00000152700.14	4507.21	0.612723	0.129648	4.72607	2.28911e-06	5.34882e-05
ENSG00000142025.16	17.2181	3.23684	0.684979	4.72546	2.296e-06	5.36175e-05
ENSG00000130254.12	2760.6	-0.473673	0.100248	-4.72503	2.30087e-06	5.36995e-05
ENSG00000227145.2	7.65534	-2.31853	0.490717	-4.72479	2.30356e-06	5.37308e-05
ENSG00000170476.16	1944.49	-1.70157	0.360213	-4.72379	2.31491e-06	5.39636e-05
ENSG00000165233.18	1516.11	-0.831872	0.176146	-4.72262	2.32826e-06	5.42429e-05
ENSG00000175556.17	95.6032	1.38178	0.292647	4.72165	2.33935e-06	5.44468e-05
ENSG00000180917.18	1782.36	0.597741	0.126597	4.72162	2.33976e-06	5.44468e-05
ENSG00000259374.2	26.4487	-3.10447	0.657552	-4.72125	2.34395e-06	5.45124e-05
ENSG00000231731.7	60.6027	-1.11274	0.235796	-4.71905	2.36945e-06	5.5073e-05
ENSG00000184210.6	2.27892	-2.44646	0.518457	-4.71874	2.37309e-06	5.51254e-05
ENSG00000241294.1	368.032	-2.12258	0.449867	-4.71824	2.37894e-06	5.52289e-05
ENSG00000182484.15	324.718	-0.918401	0.194674	-4.71765	2.38585e-06	5.53568e-05
ENSG00000160593.19	574.463	-1.39754	0.29625	-4.71744	2.38828e-06	5.53572e-05
ENSG00000279799.1	17.5528	-0.955528	0.202554	-4.71741	2.38866e-06	5.53572e-05
ENSG00000271554.1	7.33816	-1.35364	0.286972	-4.71698	2.39373e-06	5.54421e-05
ENSG00000181904.9	3073.8	0.57875	0.122701	4.71676	2.39629e-06	5.54689e-05
ENSG00000215009.5	20.5736	1.73372	0.367674	4.71539	2.41247e-06	5.57835e-05
ENSG00000165275.10	571.839	-0.626348	0.132834	-4.71527	2.41394e-06	5.57835e-05
ENSG00000234883.6	109.023	-1.45253	0.30805	-4.71525	2.4141e-06	5.57835e-05
ENSG00000230266.1	12.3428	-1.91825	0.406829	-4.71513	2.41556e-06	5.57846e-05
ENSG00000101445.10	727.449	-1.36351	0.289223	-4.71439	2.42435e-06	5.59549e-05
ENSG00000278771.1	35.0431	-2.10896	0.44743	-4.7135	2.43495e-06	5.6167e-05
ENSG00000261121.2	43.655	2.31917	0.492049	4.71329	2.43748e-06	5.61925e-05
ENSG00000234199.3	9.34393	-1.66396	0.353103	-4.71237	2.44847e-06	5.6413e-05
ENSG00000234498.3	97.3015	-1.01019	0.214387	-4.71198	2.45318e-06	5.64889e-05
ENSG00000232859.10	302.784	-0.898774	0.190757	-4.71162	2.45753e-06	5.65561e-05
ENSG00000221946.8	10.4977	-1.73903	0.369181	-4.71051	2.47095e-06	5.68318e-05
ENSG00000155368.16	9357.76	0.864537	0.183546	4.71018	2.47494e-06	5.68906e-05
ENSG00000147255.19	230.58	-2.21501	0.470326	-4.70953	2.48293e-06	5.70412e-05
ENSG00000259792.1	5.67005	-1.22398	0.260013	-4.70738	2.50927e-06	5.76128e-05
ENSG00000037474.15	5022.57	0.572291	0.121583	4.70699	2.51406e-06	5.76895e-05
ENSG00000180257.14	560.408	0.61593	0.130898	4.70541	2.53351e-06	5.8102e-05
ENSG00000111142.14	4683.88	0.409648	0.087067	4.70497	2.53903e-06	5.8195e-05
ENSG00000226849.1	8.93149	-1.0357	0.220147	-4.70456	2.54419e-06	5.82779e-05
ENSG00000277548.1	14.5163	-1.13575	0.241421	-4.70444	2.5456e-06	5.82779e-05
ENSG00000128050.9	11254.9	0.604444	0.128515	4.70329	2.56002e-06	5.85744e-05
ENSG00000164112.13	15.3878	-1.45922	0.310306	-4.70251	2.56978e-06	5.87637e-05
ENSG00000267503.1	16.7642	-1.74475	0.371102	-4.70155	2.58199e-06	5.90087e-05
ENSG00000169299.14	1993.07	0.490525	0.104344	4.70106	2.58817e-06	5.91159e-05
ENSG00000108588.14	8534.2	0.816226	0.173648	4.70046	2.59572e-06	5.92543e-05
ENSG00000136379.12	1881.69	0.89225	0.189835	4.70013	2.59993e-06	5.93162e-05
ENSG00000260751.2	42.1932	-0.755611	0.160772	-4.6999	2.60284e-06	5.93483e-05
ENSG00000176171.11	2978.69	0.837112	0.178146	4.69902	2.61409e-06	5.95706e-05
ENSG00000185883.12	8.68179	-1.0662	0.226962	-4.6977	2.6311e-06	5.99237e-05
ENSG00000137975.8	1272.9	2.73569	0.582399	4.69729	2.6364e-06	6.00098e-05
ENSG00000087470.18	4756.85	0.500423	0.106547	4.69673	2.64355e-06	6.0109e-05
ENSG00000197584.12	7.49614	2.38549	0.507909	4.6967	2.64404e-06	6.0109e-05
ENSG00000131401.11	795.103	-1.39337	0.296676	-4.6966	2.64531e-06	6.0109e-05
ENSG00000102100.16	3246.94	0.611293	0.130164	4.69632	2.64896e-06	6.01575e-05
ENSG00000258498.8	63.6519	-1.6159	0.344138	-4.6955	2.65956e-06	6.03637e-05
ENSG00000247373.3	162.19	-0.700085	0.149112	-4.69504	2.66558e-06	6.04657e-05
ENSG00000168874.13	96.2579	-1.23306	0.262638	-4.69489	2.66754e-06	6.04754e-05
ENSG00000171798.18	310.169	2.47142	0.526433	4.69466	2.67053e-06	6.05087e-05
ENSG00000118873.16	4306.78	0.638443	0.13601	4.69408	2.67808e-06	6.06449e-05
ENSG00000180776.16	4782.18	0.612989	0.130603	4.69353	2.68534e-06	6.07746e-05
ENSG00000259986.1	4.09484	-2.92374	0.622985	-4.69312	2.69063e-06	6.08596e-05
ENSG00000185792.10	4.54657	-1.91279	0.407614	-4.69264	2.69696e-06	6.09678e-05
ENSG00000213411.2	11.2472	-1.30203	0.27748	-4.69233	2.70106e-06	6.10259e-05
ENSG00000256234.1	32.2643	-1.88976	0.402835	-4.69115	2.7167e-06	6.13442e-05
ENSG00000270164.1	78.6995	-1.12666	0.240191	-4.69069	2.72288e-06	6.14486e-05
ENSG00000130222.11	723.092	-1.3382	0.285365	-4.68944	2.73957e-06	6.17595e-05
ENSG00000262298.1	4.30852	-1.09327	0.233135	-4.68942	2.73977e-06	6.17595e-05
ENSG00000227591.5	15.1484	-1.76841	0.377135	-4.68905	2.74476e-06	6.18368e-05
ENSG00000144320.14	2905.18	0.576548	0.12296	4.68891	2.74659e-06	6.18429e-05
ENSG00000109171.15	3922.35	0.537501	0.114645	4.68838	2.75372e-06	6.19402e-05
ENSG00000136149.6	225.862	-1.08631	0.231706	-4.68831	2.75474e-06	6.19402e-05
ENSG00000106105.15	7897.5	0.645379	0.137662	4.68815	2.75691e-06	6.19402e-05
ENSG00000137414.6	3221.51	0.59232	0.126345	4.68813	2.75717e-06	6.19402e-05
ENSG00000275342.5	1954.6	-0.998868	0.213111	-4.68708	2.77125e-06	6.21861e-05
ENSG00000243811.11	17.7517	-1.11145	0.237131	-4.68708	2.77126e-06	6.21861e-05
ENSG00000282780.1	8.35199	-2.08582	0.445174	-4.6854	2.7941e-06	6.2663e-05
ENSG00000153303.17	16.62	-1.69229	0.36121	-4.68507	2.79871e-06	6.2731e-05
ENSG00000149084.13	1908.33	0.643333	0.137325	4.68473	2.80324e-06	6.27969e-05
ENSG00000167578.18	44.0513	-0.820619	0.175176	-4.68455	2.8058e-06	6.28188e-05
ENSG00000134571.11	7.88116	-1.35031	0.288307	-4.68359	2.81899e-06	6.30785e-05
ENSG00000222037.5	16.0368	-2.08526	0.445262	-4.68322	2.82405e-06	6.3156e-05
ENSG00000141295.14	1359.79	-0.926218	0.197806	-4.68247	2.83445e-06	6.33529e-05
ENSG00000286214.1	125.769	-1.36941	0.29247	-4.68223	2.83766e-06	6.33889e-05
ENSG00000273837.1	25.933	-1.52802	0.32638	-4.68171	2.84494e-06	6.35157e-05
ENSG00000260808.1	5.58637	-1.17035	0.250031	-4.68081	2.85741e-06	6.37388e-05
ENSG00000255065.1	5.87818	5.01925	1.07232	4.68073	2.85859e-06	6.37388e-05
ENSG00000110900.16	282.234	-1.31263	0.280437	-4.68064	2.85976e-06	6.37388e-05
ENSG00000223519.8	36.0442	-1.51859	0.324497	-4.67983	2.87114e-06	6.39563e-05
ENSG00000244509.4	1513.22	-1.03382	0.220922	-4.67956	2.87495e-06	6.39727e-05
ENSG00000142347.19	1225.7	-0.921307	0.19688	-4.67955	2.87511e-06	6.39727e-05
ENSG00000279591.1	9.70205	-2.04121	0.436217	-4.67935	2.87785e-06	6.39979e-05
ENSG00000275017.1	6.50207	-1.82878	0.390904	-4.67834	2.89209e-06	6.42784e-05
ENSG00000229994.1	27.8068	-1.26675	0.270841	-4.67708	2.90988e-06	6.46376e-05
ENSG00000057704.13	840.146	1.15481	0.24692	4.67687	2.91281e-06	6.46664e-05
ENSG00000286900.1	3.04211	-2.0867	0.446225	-4.67635	2.92029e-06	6.47819e-05
ENSG00000270469.1	4.83387	-1.43197	0.306221	-4.67628	2.92129e-06	6.47819e-05
ENSG00000135829.17	13874.7	0.387353	0.0828411	4.67586	2.92727e-06	6.48783e-05
ENSG00000269102.1	8.22405	-1.48402	0.317422	-4.67521	2.9365e-06	6.50464e-05
ENSG00000102125.16	1103.86	-0.653102	0.139701	-4.67499	2.93973e-06	6.50815e-05
ENSG00000122376.12	2047.04	0.435532	0.093181	4.67404	2.95326e-06	6.53446e-05
ENSG00000166908.18	4800.55	0.560153	0.119859	4.67342	2.96226e-06	6.55072e-05
ENSG00000211716.2	20.6858	-1.65709	0.354595	-4.67319	2.96553e-06	6.55429e-05
ENSG00000250473.1	1.78604	-2.99141	0.640187	-4.67272	2.97242e-06	6.56586e-05
ENSG00000274712.2	133.137	-0.974667	0.208643	-4.67147	2.99056e-06	6.60224e-05
ENSG00000228839.5	16.5539	-1.05675	0.226225	-4.67125	2.99376e-06	6.60561e-05
ENSG00000270472.2	12.2787	-2.219	0.475058	-4.671	2.9973e-06	6.60618e-05
ENSG00000120265.18	3791.5	0.569341	0.121889	4.671	2.99735e-06	6.60618e-05
ENSG00000211667.3	11.2303	-2.2433	0.480278	-4.67084	2.99978e-06	6.60785e-05
ENSG00000196914.9	12215.8	0.635984	0.136165	4.67067	3.00213e-06	6.60936e-05
ENSG00000074317.11	6.73483	2.19291	0.469532	4.67043	3.00571e-06	6.61356e-05
ENSG00000285943.1	30.6271	-0.933708	0.199924	-4.67031	3.0074e-06	6.6136e-05
ENSG00000163961.4	1652.07	0.561769	0.12029	4.67012	3.01018e-06	6.61606e-05
ENSG00000227523.1	5.01219	-3.01526	0.645676	-4.66992	3.01318e-06	6.61896e-05
ENSG00000086666.19	4691.5	0.538614	0.115345	4.66959	3.01806e-06	6.62602e-05
ENSG00000104320.14	6709.64	0.614096	0.131544	4.66838	3.03591e-06	6.66151e-05
ENSG00000157017.16	41.086	-1.12425	0.240841	-4.66801	3.04128e-06	6.66893e-05
ENSG00000172262.11	2232.27	0.460172	0.0985818	4.66792	3.04266e-06	6.66893e-05
ENSG00000164877.19	1778.82	-0.853922	0.182944	-4.66766	3.04656e-06	6.67379e-05
ENSG00000085760.15	2575.76	0.41035	0.0879258	4.667	3.05631e-06	6.69145e-05
ENSG00000239704.11	26.1496	-1.24487	0.266749	-4.66681	3.05914e-06	6.69393e-05
ENSG00000211767.1	3.42841	-2.17735	0.466731	-4.66509	3.08479e-06	6.74634e-05
ENSG00000184897.6	3894.36	-0.832012	0.178377	-4.66436	3.09586e-06	6.76681e-05
ENSG00000151247.12	2232.6	0.525308	0.112625	4.66421	3.09801e-06	6.76778e-05
ENSG00000235910.2	13.5213	-1.50716	0.323183	-4.66349	3.10894e-06	6.7879e-05
ENSG00000087338.5	2142.87	0.491382	0.105374	4.66322	3.11297e-06	6.78946e-05
ENSG00000100150.20	731.079	-0.393295	0.0843398	-4.66321	3.11308e-06	6.78946e-05
ENSG00000117834.13	47.7759	-1.45284	0.311592	-4.66263	3.12195e-06	6.80506e-05
ENSG00000269421.1	10.1634	1.6087	0.34503	4.66248	3.12416e-06	6.80612e-05
ENSG00000043093.15	2592.47	0.623945	0.133834	4.66206	3.13057e-06	6.81636e-05
ENSG00000131931.8	582.636	0.575628	0.123482	4.66163	3.1371e-06	6.82681e-05
ENSG00000150756.14	875.099	0.522342	0.112081	4.66038	3.15625e-06	6.86471e-05
ENSG00000271424.1	4.91068	-1.27098	0.272747	-4.65992	3.16328e-06	6.87399e-05
ENSG00000196937.11	1638.96	0.530701	0.113887	4.65988	3.16399e-06	6.87399e-05
ENSG00000266573.6	20.7959	-2.78298	0.597275	-4.65947	3.17027e-06	6.88388e-05
ENSG00000072756.17	1116.4	0.401173	0.0861099	4.65885	3.17986e-06	6.90091e-05
ENSG00000167208.15	575.588	-1.29722	0.27846	-4.65854	3.18457e-06	6.90689e-05
ENSG00000241657.1	13.5118	-1.80384	0.38722	-4.65844	3.1861e-06	6.90689e-05
ENSG00000124593.16	29.1558	-1.05912	0.227378	-4.65798	3.19331e-06	6.91872e-05
ENSG00000287467.1	24.5196	-1.37135	0.294451	-4.65732	3.20352e-06	6.93531e-05
ENSG00000186056.10	85.933	-0.675507	0.145044	-4.65726	3.20447e-06	6.93531e-05
ENSG00000196118.12	26.665	-1.05495	0.226535	-4.65689	3.21027e-06	6.94408e-05
ENSG00000112249.14	3810.86	0.776691	0.166842	4.65525	3.23583e-06	6.99555e-05
ENSG00000239367.2	4.96478	-1.66929	0.358643	-4.65445	3.24846e-06	7.01382e-05
ENSG00000272690.6	25.3975	-1.10678	0.237791	-4.65445	3.24849e-06	7.01382e-05
ENSG00000197713.15	2144.45	0.467403	0.100422	4.65438	3.2496e-06	7.01382e-05
ENSG00000147166.11	40.2894	-1.1384	0.2446	-4.65413	3.25359e-06	7.0186e-05
ENSG00000121274.14	1396.92	0.729186	0.156683	4.6539	3.25715e-06	7.02247e-05
ENSG00000197721.17	9.59747	-1.66345	0.357459	-4.65355	3.26274e-06	7.03069e-05
ENSG00000151365.2	967.252	2.19077	0.470906	4.65224	3.28343e-06	7.07142e-05
ENSG00000175040.6	717.269	-1.47209	0.316442	-4.65201	3.28714e-06	7.07558e-05
ENSG00000136381.13	3961.83	0.632101	0.135919	4.65056	3.31035e-06	7.12165e-05
ENSG00000229106.1	4.40737	-2.34488	0.504273	-4.65003	3.31889e-06	7.13616e-05
ENSG00000149781.13	1340.11	-1.09521	0.235542	-4.64975	3.32344e-06	7.13915e-05
ENSG00000163947.12	2730.92	-0.650282	0.139857	-4.64963	3.32529e-06	7.13915e-05
ENSG00000242689.3	20.0349	0.78096	0.167965	4.64956	3.3265e-06	7.13915e-05
ENSG00000250510.8	244.684	-1.46495	0.315078	-4.64949	3.32749e-06	7.13915e-05
ENSG00000179965.12	233.115	-0.711892	0.153142	-4.64858	3.3423e-06	7.16349e-05
ENSG00000185347.18	612.797	-0.948175	0.203971	-4.64857	3.34246e-06	7.16349e-05
ENSG00000154252.12	38.0809	1.81546	0.390558	4.64839	3.34542e-06	7.16598e-05
ENSG00000198898.14	5680.62	0.427535	0.0919818	4.64804	3.35104e-06	7.17412e-05
ENSG00000250698.1	3.68169	-4.17842	0.899033	-4.64768	3.35686e-06	7.18271e-05
ENSG00000217644.5	5.38004	-1.19806	0.257785	-4.64753	3.35938e-06	7.18421e-05
ENSG00000239571.1	26.2093	-2.55944	0.550824	-4.64656	3.37515e-06	7.21405e-05
ENSG00000136883.14	2855.62	-1.59086	0.342396	-4.64625	3.3802e-06	7.22093e-05
ENSG00000138744.16	1750.67	0.777461	0.167338	4.64606	3.3834e-06	7.22093e-05
ENSG00000102003.11	432.934	1.75362	0.377445	4.64603	3.38384e-06	7.22093e-05
ENSG00000236996.1	2.0968	2.47753	0.53331	4.64558	3.39126e-06	7.22977e-05
ENSG00000229659.1	28.0484	-0.950519	0.204608	-4.64555	3.39164e-06	7.22977e-05
ENSG00000151093.8	700.268	0.519609	0.111858	4.64526	3.39646e-06	7.23616e-05
ENSG00000168079.17	146.08	-2.11336	0.455082	-4.64392	3.4186e-06	7.27941e-05
ENSG00000112511.18	2769.42	-0.626271	0.134863	-4.64377	3.42112e-06	7.28086e-05
ENSG00000172236.18	700.656	-1.70076	0.366331	-4.6427	3.43885e-06	7.31467e-05
ENSG00000133275.16	3130.76	-0.606472	0.130647	-4.64207	3.44928e-06	7.33291e-05
ENSG00000152580.8	249.533	-1.62111	0.349258	-4.6416	3.45718e-06	7.34262e-05
ENSG00000139517.9	1748.03	0.629095	0.135536	4.64155	3.45808e-06	7.34262e-05
ENSG00000125740.14	2150.39	-1.65225	0.355976	-4.64147	3.45941e-06	7.34262e-05
ENSG00000237988.5	1037.28	-1.85246	0.399146	-4.64106	3.46631e-06	7.35333e-05
ENSG00000267348.3	46.8876	-0.905763	0.195229	-4.6395	3.49251e-06	7.40494e-05
ENSG00000131781.13	1496.86	1.62456	0.350219	4.63869	3.50619e-06	7.42776e-05
ENSG00000131473.17	10811.5	0.544519	0.117387	4.63864	3.50702e-06	7.42776e-05
ENSG00000122386.11	645.772	-0.910799	0.19636	-4.6384	3.51109e-06	7.43241e-05
ENSG00000166233.15	5698.14	0.599272	0.129229	4.6373	3.52995e-06	7.46819e-05
ENSG00000183309.12	3799.26	0.670876	0.144673	4.63719	3.53177e-06	7.46819e-05
ENSG00000256209.2	7.39523	2.86376	0.617711	4.63609	3.55066e-06	7.50413e-05
ENSG00000211685.3	210.675	-2.40731	0.519375	-4.635	3.56934e-06	7.53959e-05
ENSG00000175606.11	1738.06	0.821624	0.177269	4.63489	3.57132e-06	7.53974e-05
ENSG00000228789.8	7.49445	-1.6305	0.351796	-4.63478	3.57322e-06	7.53974e-05
ENSG00000187166.1	2.33369	-1.81906	0.392551	-4.63394	3.58776e-06	7.5664e-05
ENSG00000242607.1	8.6813	-1.4713	0.317559	-4.63315	3.60148e-06	7.59129e-05
ENSG00000271143.1	1.24214	-2.42107	0.522584	-4.63288	3.60614e-06	7.59705e-05
ENSG00000250629.1	3.34304	-2.46406	0.531887	-4.63268	3.60967e-06	7.60046e-05
ENSG00000259315.1	15.754	-0.97069	0.209564	-4.63196	3.62228e-06	7.62295e-05
ENSG00000166501.14	729.014	-1.5562	0.335993	-4.63165	3.62766e-06	7.63021e-05
ENSG00000229873.1	6.00787	-1.03565	0.223654	-4.6306	3.64611e-06	7.66496e-05
ENSG00000160471.13	31.6704	-1.61427	0.348637	-4.63023	3.65264e-06	7.67461e-05
ENSG00000172954.14	1311.85	0.650396	0.140487	4.62959	3.66384e-06	7.69405e-05
ENSG00000180176.15	47.2046	2.67427	0.577666	4.62944	3.66657e-06	7.69572e-05
ENSG00000172340.15	4028.82	0.551865	0.119221	4.62893	3.67563e-06	7.70312e-05
ENSG00000226380.9	21.3176	-1.35443	0.292606	-4.62887	3.67659e-06	7.70312e-05
ENSG00000235204.1	16.393	-1.50951	0.326114	-4.62878	3.67833e-06	7.70312e-05
ENSG00000274370.1	33.1058	-1.28869	0.278412	-4.62873	3.67923e-06	7.70312e-05
ENSG00000237214.3	37.3541	-1.00459	0.217036	-4.62869	3.67982e-06	7.70312e-05
ENSG00000197106.7	139.485	1.8535	0.400504	4.62792	3.6935e-06	7.72768e-05
ENSG00000232613.6	19.6078	-1.58767	0.343084	-4.62763	3.69871e-06	7.73449e-05
ENSG00000004776.13	56.5724	-1.29467	0.279798	-4.62714	3.70752e-06	7.74881e-05
ENSG00000211801.3	19.3097	-1.68463	0.364119	-4.62659	3.71742e-06	7.7654e-05
ENSG00000163743.13	1239.92	0.507553	0.109719	4.62594	3.72904e-06	7.78558e-05
ENSG00000213373.7	1.79178	-1.44545	0.312475	-4.6258	3.7316e-06	7.78681e-05
ENSG00000186007.10	45.9209	2.70936	0.58583	4.62483	3.74907e-06	7.81914e-05
ENSG00000211966.2	2263.64	-2.08603	0.451261	-4.62267	3.78834e-06	7.89312e-05
ENSG00000169427.8	27.1729	1.69294	0.366227	4.62264	3.78891e-06	7.89312e-05
ENSG00000164050.13	6113.21	-0.686019	0.148408	-4.62252	3.79101e-06	7.89312e-05
ENSG00000164930.12	3188.52	1.04756	0.226625	4.62243	3.79263e-06	7.89312e-05
ENSG00000253200.1	28.7096	-0.838004	0.181295	-4.62233	3.7945e-06	7.89312e-05
ENSG00000101856.10	9482.78	0.594647	0.128686	4.62091	3.82053e-06	7.94309e-05
ENSG00000129968.17	1519.9	-0.616912	0.133526	-4.62018	3.83415e-06	7.96687e-05
ENSG00000184441.4	81.1165	-0.719892	0.155818	-4.62008	3.83599e-06	7.96687e-05
ENSG00000088881.21	1431.2	-1.2581	0.27235	-4.6194	3.84845e-06	7.98856e-05
ENSG00000231201.1	5.98587	-2.23225	0.483301	-4.61875	3.86054e-06	8.00826e-05
ENSG00000120053.12	2792.03	0.638114	0.13816	4.61867	3.86198e-06	8.00826e-05
ENSG00000276953.1	17.1206	-1.94168	0.420596	-4.6165	3.90271e-06	8.08621e-05
ENSG00000170955.10	156.364	-1.07551	0.232973	-4.61645	3.90366e-06	8.08621e-05
ENSG00000072182.13	11.4168	-1.41587	0.306718	-4.61618	3.90861e-06	8.09223e-05
ENSG00000223511.7	24.8768	-1.35939	0.294507	-4.61581	3.91568e-06	8.10185e-05
ENSG00000138674.17	14599.5	0.415752	0.0900731	4.61572	3.91735e-06	8.10185e-05
ENSG00000002822.15	30.7876	-1.29704	0.281075	-4.61457	3.93909e-06	8.14256e-05
ENSG00000076984.18	1928.47	-0.5272	0.114259	-4.6141	3.94801e-06	8.15576e-05
ENSG00000139914.6	14.6857	-1.16029	0.25147	-4.61402	3.94959e-06	8.15576e-05
ENSG00000287064.1	66.1329	2.61578	0.566993	4.61343	3.96075e-06	8.17454e-05
ENSG00000075340.23	289.95	-1.39954	0.303377	-4.61321	3.96506e-06	8.17918e-05
ENSG00000122043.11	2.99844	-2.19517	0.475896	-4.6127	3.97467e-06	8.19472e-05
ENSG00000286481.1	14.0702	-2.22049	0.481409	-4.61249	3.97875e-06	8.19888e-05
ENSG00000166913.13	24543.6	0.420489	0.0911856	4.61135	4.00055e-06	8.2395e-05
ENSG00000117222.14	2724.78	0.496963	0.107788	4.61054	4.01624e-06	8.26753e-05
ENSG00000116691.11	1335.53	-0.88844	0.19273	-4.60978	4.03104e-06	8.29369e-05
ENSG00000199753.1	56.1355	-1.49603	0.324572	-4.60923	4.04154e-06	8.31097e-05
ENSG00000157184.7	747.85	0.474243	0.1029	4.60877	4.05063e-06	8.32533e-05
ENSG00000107738.20	1452.27	-0.989096	0.214773	-4.60531	4.11858e-06	8.46061e-05
ENSG00000203872.7	41.4593	-1.17269	0.254644	-4.60519	4.12093e-06	8.46104e-05
ENSG00000149428.19	8822.22	0.737562	0.16019	4.60431	4.13839e-06	8.49248e-05
ENSG00000284526.1	100.835	-1.37469	0.298606	-4.60368	4.15095e-06	8.51386e-05
ENSG00000258545.6	42.7293	-1.48011	0.321556	-4.60296	4.1653e-06	8.53886e-05
ENSG00000236478.2	5.61148	-2.42177	0.526206	-4.60232	4.1782e-06	8.56088e-05
ENSG00000025708.14	5101.27	-0.998403	0.216956	-4.60187	4.1872e-06	8.57489e-05
ENSG00000246695.8	258.405	-0.965293	0.209834	-4.60028	4.2192e-06	8.63595e-05
ENSG00000277383.1	10.008	-1.03125	0.224244	-4.59876	4.2501e-06	8.6947e-05
ENSG00000069329.18	9954.58	0.602686	0.131082	4.59777	4.27027e-06	8.73145e-05
ENSG00000072803.17	3413.17	0.491187	0.10684	4.59743	4.27733e-06	8.74139e-05
ENSG00000101938.15	636.427	-1.63808	0.356312	-4.59731	4.27973e-06	8.74177e-05
ENSG00000124207.17	10173.3	0.652924	0.142076	4.59561	4.31491e-06	8.80491e-05
ENSG00000255152.8	15.5523	-1.23061	0.267781	-4.5956	4.31509e-06	8.80491e-05
ENSG00000170786.12	1149.44	2.22855	0.485064	4.59435	4.34101e-06	8.85325e-05
ENSG00000204237.5	1275.98	-0.882943	0.192186	-4.5942	4.34413e-06	8.85506e-05
ENSG00000176623.12	2904.41	0.617006	0.134321	4.59352	4.35836e-06	8.87803e-05
ENSG00000174498.14	223.103	-2.13678	0.465181	-4.59344	4.35989e-06	8.87803e-05
ENSG00000224733.1	2.21817	-4.1172	0.896468	-4.59269	4.37568e-06	8.90562e-05
ENSG00000103355.13	22.59	3.77163	0.821321	4.59215	4.38694e-06	8.92394e-05
ENSG00000262115.1	4.84305	-1.11669	0.243307	-4.58965	4.43993e-06	9.02709e-05
ENSG00000197471.12	777.174	-1.19527	0.260705	-4.58475	4.54529e-06	9.23657e-05
ENSG00000198538.11	1601.98	0.662388	0.144507	4.58377	4.5666e-06	9.27349e-05
ENSG00000211978.2	26.9802	-2.29597	0.500899	-4.5837	4.56814e-06	9.27349e-05
ENSG00000124203.6	187.952	-1.69167	0.369075	-4.58354	4.57172e-06	9.27599e-05
ENSG00000067533.6	1892.87	0.475495	0.103746	4.58325	4.57811e-06	9.28421e-05
ENSG00000234465.11	69.0964	-0.75411	0.164541	-4.5831	4.58137e-06	9.28608e-05
ENSG00000215440.12	460.316	-1.01999	0.222564	-4.58291	4.58543e-06	9.28954e-05
ENSG00000242258.1	40.4044	-1.63007	0.35574	-4.58221	4.60085e-06	9.31601e-05
ENSG00000132305.21	6546.51	0.435299	0.0950138	4.58142	4.61822e-06	9.34449e-05
ENSG00000101883.5	6.21369	-1.36567	0.298092	-4.58136	4.61963e-06	9.34449e-05
ENSG00000279283.1	28.2974	-1.48616	0.324413	-4.58109	4.62552e-06	9.35162e-05
ENSG00000203668.3	2514.92	0.939919	0.205256	4.57924	4.66669e-06	9.42806e-05
ENSG00000136143.16	1971.73	0.489482	0.106893	4.57918	4.66809e-06	9.42806e-05
ENSG00000139620.13	1737.04	0.330785	0.0722463	4.57858	4.68144e-06	9.4502e-05
ENSG00000213015.9	1126.5	-0.757401	0.165433	-4.5783	4.68762e-06	9.45787e-05
ENSG00000253919.1	15.0235	1.1221	0.245097	4.57817	4.69051e-06	9.45888e-05
ENSG00000272578.5	48.3329	-1.09805	0.239891	-4.57729	4.71047e-06	9.4943e-05
ENSG00000211513.5	4.76912	-1.2121	0.264827	-4.57693	4.71846e-06	9.50252e-05
ENSG00000152154.11	81.1305	-1.0655	0.2328	-4.57689	4.71935e-06	9.50252e-05
ENSG00000262151.1	2.38149	-2.51821	0.550231	-4.57664	4.72511e-06	9.50725e-05
ENSG00000126882.13	601.929	-1.01546	0.221882	-4.57658	4.7265e-06	9.50725e-05
ENSG00000174946.7	131.897	-1.64002	0.358532	-4.57426	4.77911e-06	9.6082e-05
ENSG00000183426.17	206.061	-0.795278	0.173872	-4.57392	4.78679e-06	9.61875e-05
ENSG00000280195.1	42.6857	-0.767121	0.167732	-4.57349	4.7967e-06	9.63378e-05
ENSG00000272334.1	4.14872	-1.56135	0.341416	-4.57317	4.80395e-06	9.64344e-05
ENSG00000158517.15	199.83	-1.32043	0.288779	-4.57246	4.8202e-06	9.67117e-05
ENSG00000163083.6	2318.14	1.39554	0.305221	4.57223	4.82566e-06	9.67662e-05
ENSG00000181847.12	587.447	-1.58704	0.347118	-4.57204	4.83003e-06	9.67662e-05
ENSG00000187922.14	2.98148	-2.5301	0.553386	-4.57203	4.83025e-06	9.67662e-05
ENSG00000179918.19	9251.53	0.773613	0.169212	4.57185	4.83445e-06	9.6798e-05
ENSG00000204113.6	3.13581	-4.02334	0.880045	-4.57175	4.83672e-06	9.6798e-05
ENSG00000162928.9	3030.77	0.534825	0.116994	4.57139	4.84491e-06	9.69128e-05
ENSG00000211672.2	10.4457	-2.71607	0.594162	-4.57127	4.84783e-06	9.69224e-05
ENSG00000224376.1	63.7983	-0.971123	0.212484	-4.57033	4.86956e-06	9.73077e-05
ENSG00000234203.1	3.13829	-2.06879	0.452742	-4.56947	4.88967e-06	9.76602e-05
ENSG00000256950.2	1.87466	-1.54377	0.337885	-4.56893	4.90231e-06	9.78634e-05
ENSG00000260645.2	29.2739	-1.09778	0.240281	-4.56872	4.90706e-06	9.79089e-05
ENSG00000263345.1	73.0007	-0.984575	0.215525	-4.56826	4.91788e-06	9.80753e-05
ENSG00000168298.7	93.8423	-1.85871	0.406893	-4.56805	4.92286e-06	9.81252e-05
ENSG00000266910.2	50.9453	-0.937787	0.205365	-4.56643	4.96099e-06	9.88354e-05
ENSG00000139973.16	23.1156	2.01247	0.440752	4.566	4.9713e-06	9.89374e-05
ENSG00000251034.2	71.8583	-1.02298	0.224047	-4.56592	4.97299e-06	9.89374e-05
ENSG00000166451.13	446.978	0.800038	0.17522	4.5659	4.9736e-06	9.89374e-05
ENSG00000274501.1	7.61804	-1.18925	0.260505	-4.56518	4.99057e-06	9.92081e-05
ENSG00000117560.8	88.0114	-1.55664	0.340992	-4.56504	4.99398e-06	9.92081e-05
ENSG00000134851.13	5123.66	0.497054	0.108886	4.56492	4.99692e-06	9.92081e-05
ENSG00000105329.11	2582.79	-0.729174	0.159735	-4.5649	4.99723e-06	9.92081e-05
ENSG00000158815.11	4.41672	-1.76318	0.386277	-4.56457	5.00528e-06	9.93183e-05
ENSG00000213023.11	26.7955	1.9183	0.420302	4.56409	5.01659e-06	9.94927e-05
ENSG00000255122.1	6.63112	-1.60654	0.35201	-4.5639	5.02128e-06	9.95359e-05
ENSG00000260891.1	9.16429	-1.21376	0.265958	-4.56372	5.02547e-06	9.95691e-05
[truncated: 58,661 more rows]
