# Supplementary material for: Transcriptomic Profiling of Breast Cancer Cells Induced by Tumor-Associated Macrophages Generates a Robust Prognostic Gene Signature
Source: Cancers (Basel). 2022 Oct 31;14(21):5364. doi: 10.3390/cancers14215364 (PMC9655582; doi:10.3390/cancers14215364)
Supplement: Supplementary file 1 [file cancers-14-05364-s001.zip › Supplementary Table S3.xlsx]

## Sheet: Supplementary table 3 riskscore
	ID	Description	setSize	enrichmentScore	NES	pvalue	p.adjust	qvalues	rank	leading_edge	core_enrichment
GO:0002377	GO:0002377	immunoglobulin production	206	-0.610573	-1.94461	1e-10	7.85571e-08	6.54586e-08	8781	tags=53%, list=22%, signal=42%	ENSG00000143184/ENSG00000243290/ENSG00000196126/ENSG00000211656/ENSG00000204257/ENSG00000187997/ENSG00000211821/ENSG00000211816/ENSG00000204252/ENSG00000178562/ENSG00000211598/ENSG00000211663/ENSG00000211625/ENSG00000010671/ENSG00000211662/ENSG00000198502/ENSG00000175857/ENSG00000081237/ENSG00000243466/ENSG00000179344/ENSG00000101017/ENSG00000251546/ENSG00000211651/ENSG00000211799/ENSG00000211633…
GO:0002440	GO:0002440	production of molecular mediator of immune response	297	-0.529244	-1.70064	1e-10	7.85571e-08	6.54586e-08	8648	tags=43%, list=22%, signal=34%	ENSG00000243290/ENSG00000196126/ENSG00000211656/ENSG00000204257/ENSG00000187997/ENSG00000211821/ENSG00000161929/ENSG00000211816/ENSG00000204252/ENSG00000178562/ENSG00000211598/ENSG00000211663/ENSG00000211625/ENSG00000150782/ENSG00000204632/ENSG00000197561/ENSG00000019582/ENSG00000010671/ENSG00000185897/ENSG00000028137/ENSG00000211662/ENSG00000198502/ENSG00000175857/ENSG00000081237/ENSG00000243466…
GO:0002460	GO:0002460	adaptive immune response based on somatic recombination of immune receptors built from immunoglobulin superfamily domains	334	-0.508666	-1.63917	1e-10	7.85571e-08	6.54586e-08	12084	tags=51%, list=31%, signal=35%	ENSG00000270550/ENSG00000139178/ENSG00000211974/ENSG00000116670/ENSG00000205846/ENSG00000110719/ENSG00000205403/ENSG00000232810/ENSG00000104972/ENSG00000173372/ENSG00000115604/ENSG00000211935/ENSG00000105329/ENSG00000159403/ENSG00000211952/ENSG00000092929/ENSG00000274576/ENSG00000010610/ENSG00000206503/ENSG00000163874/ENSG00000150637/ENSG00000123338/ENSG00000182326/ENSG00000134545/ENSG00000166278…
GO:0006910	GO:0006910	phagocytosis, recognition	88	-0.66532	-2.03758	1e-10	7.85571e-08	6.54586e-08	6353	tags=55%, list=16%, signal=46%	ENSG00000223648/ENSG00000211957/ENSG00000276775/ENSG00000211892/ENSG00000123838/ENSG00000211964/ENSG00000211955/ENSG00000224373/ENSG00000211944/ENSG00000211970/ENSG00000211976/ENSG00000122852/ENSG00000224650/ENSG00000211956/ENSG00000211959/ENSG00000211890/ENSG00000211895/ENSG00000211937/ENSG00000211973/ENSG00000280411/ENSG00000211938/ENSG00000211679/ENSG00000211979/ENSG00000211893/ENSG00000211677…
GO:0050851	GO:0050851	antigen receptor-mediated signaling pathway	223	-0.542087	-1.72981	1e-10	7.85571e-08	6.54586e-08	10727	tags=51%, list=27%, signal=37%	ENSG00000118046/ENSG00000274576/ENSG00000206503/ENSG00000163874/ENSG00000150637/ENSG00000123338/ENSG00000196839/ENSG00000010810/ENSG00000172578/ENSG00000134215/ENSG00000049768/ENSG00000167604/ENSG00000211943/ENSG00000133246/ENSG00000117281/ENSG00000186470/ENSG00000134242/ENSG00000117228/ENSG00000211972/ENSG00000282639/ENSG00000225698/ENSG00000074966/ENSG00000196126/ENSG00000111679/ENSG00000124557…
GO:0050853	GO:0050853	B cell receptor signaling pathway	116	-0.642862	-2.00591	1e-10	7.85571e-08	6.54586e-08	7024	tags=56%, list=18%, signal=46%	ENSG00000081237/ENSG00000132522/ENSG00000160999/ENSG00000223648/ENSG00000211957/ENSG00000004468/ENSG00000276775/ENSG00000211892/ENSG00000163599/ENSG00000211964/ENSG00000171608/ENSG00000211955/ENSG00000174500/ENSG00000224373/ENSG00000211944/ENSG00000211970/ENSG00000211976/ENSG00000224650/ENSG00000211956/ENSG00000113263/ENSG00000211959/ENSG00000211890/ENSG00000211895/ENSG00000211937/ENSG00000166501…
GO:0051251	GO:0051251	positive regulation of lymphocyte activation	345	-0.500106	-1.61268	1e-10	7.85571e-08	6.54586e-08	10718	tags=47%, list=27%, signal=34%	ENSG00000274576/ENSG00000010610/ENSG00000110492/ENSG00000206503/ENSG00000123338/ENSG00000121807/ENSG00000136244/ENSG00000175467/ENSG00000196839/ENSG00000010810/ENSG00000169508/ENSG00000204287/ENSG00000090776/ENSG00000134215/ENSG00000049768/ENSG00000167604/ENSG00000211943/ENSG00000158473/ENSG00000117281/ENSG00000242574/ENSG00000196735/ENSG00000134242/ENSG00000276231/ENSG00000020633/ENSG00000211972…
GO:0006958	GO:0006958	complement activation, classical pathway	95	-0.636184	-1.96021	2.39339e-10	1.64516e-07	1.37084e-07	6353	tags=55%, list=16%, signal=46%	ENSG00000223648/ENSG00000211957/ENSG00000276775/ENSG00000211892/ENSG00000123838/ENSG00000211964/ENSG00000211955/ENSG00000224373/ENSG00000211944/ENSG00000112936/ENSG00000211970/ENSG00000211976/ENSG00000203710/ENSG00000224650/ENSG00000211956/ENSG00000211959/ENSG00000211890/ENSG00000211895/ENSG00000039537/ENSG00000211937/ENSG00000211973/ENSG00000197721/ENSG00000280411/ENSG00000211938/ENSG00000211679…
GO:0035967	GO:0035967	cellular response to topologically incorrect protein	114	0.481206	2.43771	3.71261e-10	2.11662e-07	1.7637e-07	9666	tags=54%, list=24%, signal=41%	ENSG00000105550/ENSG00000134398/ENSG00000136986/ENSG00000099219/ENSG00000152137/ENSG00000109971/ENSG00000197930/ENSG00000104343/ENSG00000113013/ENSG00000064115/ENSG00000144381/ENSG00000135776/ENSG00000198855/ENSG00000086598/ENSG00000172071/ENSG00000012174/ENSG00000180667/ENSG00000158615/ENSG00000185345/ENSG00000128590/ENSG00000139644/ENSG00000134001/ENSG00000109133/ENSG00000207752/ENSG00000136731…
GO:0051249	GO:0051249	regulation of lymphocyte activation	491	-0.464548	-1.51324	3.87901e-10	2.11662e-07	1.7637e-07	10523	tags=40%, list=27%, signal=30%	ENSG00000110492/ENSG00000206503/ENSG00000163874/ENSG00000123338/ENSG00000121807/ENSG00000136244/ENSG00000175467/ENSG00000196839/ENSG00000010810/ENSG00000147437/ENSG00000169508/ENSG00000204287/ENSG00000090776/ENSG00000123999/ENSG00000134215/ENSG00000049768/ENSG00000167604/ENSG00000211943/ENSG00000008438/ENSG00000158473/ENSG00000117281/ENSG00000242574/ENSG00000196735/ENSG00000134242/ENSG00000276231…
GO:0034620	GO:0034620	cellular response to unfolded protein	95	0.50923	2.40067	4.23402e-10	2.11662e-07	1.7637e-07	10510	tags=64%, list=27%, signal=47%	ENSG00000105550/ENSG00000134398/ENSG00000136986/ENSG00000099219/ENSG00000152137/ENSG00000109971/ENSG00000197930/ENSG00000113013/ENSG00000064115/ENSG00000144381/ENSG00000135776/ENSG00000198855/ENSG00000086598/ENSG00000172071/ENSG00000012174/ENSG00000180667/ENSG00000158615/ENSG00000185345/ENSG00000128590/ENSG00000139644/ENSG00000134001/ENSG00000109133/ENSG00000207752/ENSG00000182158/ENSG00000014123…
GO:0002449	GO:0002449	lymphocyte mediated immunity	329	-0.499277	-1.60806	4.7095e-10	2.15813e-07	1.79828e-07	12084	tags=52%, list=31%, signal=36%	ENSG00000270550/ENSG00000139178/ENSG00000211974/ENSG00000116670/ENSG00000172575/ENSG00000110719/ENSG00000205403/ENSG00000232810/ENSG00000104972/ENSG00000168961/ENSG00000173372/ENSG00000115604/ENSG00000211935/ENSG00000105329/ENSG00000159403/ENSG00000170542/ENSG00000211952/ENSG00000092929/ENSG00000274576/ENSG00000206503/ENSG00000150637/ENSG00000123338/ENSG00000182326/ENSG00000134545/ENSG00000166278…
GO:0002455	GO:0002455	humoral immune response mediated by circulating immunoglobulin	108	-0.618337	-1.92453	5.66503e-10	2.39631e-07	1.99675e-07	6353	tags=52%, list=16%, signal=44%	ENSG00000223648/ENSG00000211957/ENSG00000276775/ENSG00000211892/ENSG00000110169/ENSG00000123838/ENSG00000211964/ENSG00000211955/ENSG00000224373/ENSG00000129654/ENSG00000211944/ENSG00000112936/ENSG00000211970/ENSG00000211976/ENSG00000203710/ENSG00000224650/ENSG00000211956/ENSG00000211959/ENSG00000211890/ENSG00000211895/ENSG00000039537/ENSG00000211937/ENSG00000211973/ENSG00000197721/ENSG00000280411…
GO:0006959	GO:0006959	humoral immune response	270	-0.508936	-1.63315	8.82919e-10	3.46798e-07	2.88973e-07	11233	tags=51%, list=28%, signal=37%	ENSG00000211935/ENSG00000184381/ENSG00000159527/ENSG00000105372/ENSG00000159403/ENSG00000211952/ENSG00000167754/ENSG00000274576/ENSG00000091513/ENSG00000206503/ENSG00000205220/ENSG00000182326/ENSG00000112561/ENSG00000196415/ENSG00000171195/ENSG00000166278/ENSG00000121807/ENSG00000136244/ENSG00000012779/ENSG00000169508/ENSG00000180210/ENSG00000211943/ENSG00000008438/ENSG00000180596/ENSG00000211972…
GO:0002429	GO:0002429	immune response-activating cell surface receptor signaling pathway	271	-0.514541	-1.65135	1.01018e-09	3.47187e-07	2.89298e-07	12995	tags=53%, list=33%, signal=36%	ENSG00000077264/ENSG00000131378/ENSG00000101096/ENSG00000026950/ENSG00000174775/ENSG00000011600/ENSG00000000938/ENSG00000072694/ENSG00000162511/ENSG00000197943/ENSG00000054148/ENSG00000270550/ENSG00000124508/ENSG00000211974/ENSG00000205846/ENSG00000141293/ENSG00000082074/ENSG00000043462/ENSG00000101336/ENSG00000211935/ENSG00000092098/ENSG00000184381/ENSG00000211952/ENSG00000118046/ENSG00000274576…
GO:0002757	GO:0002757	immune response-activating signal transduction	271	-0.514541	-1.65135	1.01018e-09	3.47187e-07	2.89298e-07	12995	tags=53%, list=33%, signal=36%	ENSG00000077264/ENSG00000131378/ENSG00000101096/ENSG00000026950/ENSG00000174775/ENSG00000011600/ENSG00000000938/ENSG00000072694/ENSG00000162511/ENSG00000197943/ENSG00000054148/ENSG00000270550/ENSG00000124508/ENSG00000211974/ENSG00000205846/ENSG00000141293/ENSG00000082074/ENSG00000043462/ENSG00000101336/ENSG00000211935/ENSG00000092098/ENSG00000184381/ENSG00000211952/ENSG00000118046/ENSG00000274576…
GO:0019724	GO:0019724	B cell mediated immunity	194	-0.543668	-1.72828	1.62117e-09	5.05074e-07	4.20859e-07	12084	tags=58%, list=31%, signal=41%	ENSG00000270550/ENSG00000139178/ENSG00000211974/ENSG00000116670/ENSG00000110719/ENSG00000205403/ENSG00000232810/ENSG00000173372/ENSG00000211935/ENSG00000105329/ENSG00000159403/ENSG00000211952/ENSG00000274576/ENSG00000150637/ENSG00000182326/ENSG00000166278/ENSG00000204287/ENSG00000049768/ENSG00000211943/ENSG00000242574/ENSG00000196735/ENSG00000211972/ENSG00000156127/ENSG00000009724/ENSG00000185507…
GO:0050864	GO:0050864	regulation of B cell activation	185	-0.54293	-1.72261	1.65327e-09	5.05074e-07	4.20859e-07	7586	tags=41%, list=19%, signal=33%	ENSG00000178562/ENSG00000104951/ENSG00000019582/ENSG00000010671/ENSG00000240972/ENSG00000081237/ENSG00000101017/ENSG00000223648/ENSG00000211957/ENSG00000004468/ENSG00000276775/ENSG00000211892/ENSG00000168918/ENSG00000163599/ENSG00000211964/ENSG00000211955/ENSG00000224373/ENSG00000129654/ENSG00000122122/ENSG00000211944/ENSG00000211970/ENSG00000211976/ENSG00000203710/ENSG00000224650/ENSG00000211956…
GO:0016064	GO:0016064	immunoglobulin mediated immune response	191	-0.540789	-1.72015	3.77451e-09	1.09242e-06	9.10274e-07	12084	tags=58%, list=31%, signal=40%	ENSG00000270550/ENSG00000139178/ENSG00000211974/ENSG00000116670/ENSG00000110719/ENSG00000205403/ENSG00000232810/ENSG00000173372/ENSG00000211935/ENSG00000105329/ENSG00000159403/ENSG00000211952/ENSG00000274576/ENSG00000150637/ENSG00000182326/ENSG00000166278/ENSG00000204287/ENSG00000049768/ENSG00000211943/ENSG00000242574/ENSG00000196735/ENSG00000211972/ENSG00000156127/ENSG00000009724/ENSG00000185507…
GO:0002768	GO:0002768	immune response-regulating cell surface receptor signaling pathway	295	-0.500041	-1.60572	4.20926e-09	1.15734e-06	9.64364e-07	12995	tags=52%, list=33%, signal=35%	ENSG00000077264/ENSG00000131378/ENSG00000101096/ENSG00000026950/ENSG00000174775/ENSG00000011600/ENSG00000000938/ENSG00000072694/ENSG00000162511/ENSG00000239961/ENSG00000197943/ENSG00000054148/ENSG00000270550/ENSG00000124508/ENSG00000211974/ENSG00000205846/ENSG00000163606/ENSG00000141293/ENSG00000104972/ENSG00000082074/ENSG00000043462/ENSG00000101336/ENSG00000211935/ENSG00000092098/ENSG00000184381…
GO:0050871	GO:0050871	positive regulation of B cell activation	140	-0.570318	-1.78797	4.95077e-09	1.29639e-06	1.08024e-06	7416	tags=46%, list=19%, signal=37%	ENSG00000019582/ENSG00000010671/ENSG00000240972/ENSG00000081237/ENSG00000101017/ENSG00000223648/ENSG00000211957/ENSG00000004468/ENSG00000276775/ENSG00000211892/ENSG00000168918/ENSG00000211964/ENSG00000211955/ENSG00000224373/ENSG00000122122/ENSG00000211944/ENSG00000211970/ENSG00000211976/ENSG00000224650/ENSG00000211956/ENSG00000211959/ENSG00000211890/ENSG00000211895/ENSG00000211937/ENSG00000113520…
GO:0006956	GO:0006956	complement activation	115	-0.58523	-1.82698	5.29565e-09	1.32367e-06	1.10297e-06	7001	tags=48%, list=18%, signal=39%	ENSG00000085265/ENSG00000127241/ENSG00000166482/ENSG00000223648/ENSG00000211957/ENSG00000276775/ENSG00000211892/ENSG00000123838/ENSG00000211964/ENSG00000211955/ENSG00000224373/ENSG00000211944/ENSG00000112936/ENSG00000211970/ENSG00000211976/ENSG00000203710/ENSG00000224650/ENSG00000211956/ENSG00000211959/ENSG00000211890/ENSG00000211895/ENSG00000039537/ENSG00000211937/ENSG00000211973/ENSG00000197721…
GO:0002696	GO:0002696	positive regulation of leukocyte activation	390	-0.471491	-1.52754	6.26566e-09	1.49804e-06	1.24826e-06	10523	tags=43%, list=27%, signal=32%	ENSG00000110492/ENSG00000206503/ENSG00000150637/ENSG00000123338/ENSG00000121807/ENSG00000136244/ENSG00000175467/ENSG00000196839/ENSG00000010810/ENSG00000169508/ENSG00000204287/ENSG00000090776/ENSG00000134215/ENSG00000049768/ENSG00000167604/ENSG00000211943/ENSG00000158473/ENSG00000117281/ENSG00000242574/ENSG00000160255/ENSG00000196735/ENSG00000134242/ENSG00000276231/ENSG00000020633/ENSG00000211972…
GO:0050867	GO:0050867	positive regulation of cell activation	400	-0.470054	-1.52464	9.23505e-09	2.11598e-06	1.76317e-06	10523	tags=42%, list=27%, signal=32%	ENSG00000110492/ENSG00000206503/ENSG00000150637/ENSG00000123338/ENSG00000121807/ENSG00000136244/ENSG00000175467/ENSG00000196839/ENSG00000010810/ENSG00000169508/ENSG00000204287/ENSG00000115956/ENSG00000090776/ENSG00000134215/ENSG00000049768/ENSG00000167604/ENSG00000211943/ENSG00000158473/ENSG00000117281/ENSG00000242574/ENSG00000160255/ENSG00000196735/ENSG00000134242/ENSG00000276231/ENSG00000020633…
GO:0042113	GO:0042113	B cell activation	307	-0.486095	-1.5632	1.23349e-08	2.71318e-06	2.26079e-06	9152	tags=37%, list=23%, signal=29%	ENSG00000120899/ENSG00000211972/ENSG00000156127/ENSG00000138795/ENSG00000282639/ENSG00000066336/ENSG00000225698/ENSG00000111679/ENSG00000187997/ENSG00000086730/ENSG00000147010/ENSG00000100060/ENSG00000162692/ENSG00000178562/ENSG00000104951/ENSG00000019582/ENSG00000010671/ENSG00000134061/ENSG00000240972/ENSG00000175857/ENSG00000081237/ENSG00000198400/ENSG00000125726/ENSG00000153551/ENSG00000132522…
GO:0002253	GO:0002253	activation of immune response	351	-0.474685	-1.53266	2.01189e-08	4.25514e-06	3.54565e-06	12995	tags=47%, list=33%, signal=32%	ENSG00000077264/ENSG00000131378/ENSG00000101096/ENSG00000026950/ENSG00000174775/ENSG00000011600/ENSG00000000938/ENSG00000072694/ENSG00000162511/ENSG00000197943/ENSG00000054148/ENSG00000280987/ENSG00000270550/ENSG00000139178/ENSG00000124508/ENSG00000211974/ENSG00000205846/ENSG00000205403/ENSG00000141293/ENSG00000082074/ENSG00000043462/ENSG00000101336/ENSG00000173372/ENSG00000211935/ENSG00000092098…
GO:0006911	GO:0006911	phagocytosis, engulfment	115	-0.574772	-1.79433	2.42796e-08	4.94495e-06	4.12044e-06	6353	tags=46%, list=16%, signal=39%	ENSG00000223648/ENSG00000211957/ENSG00000163219/ENSG00000276775/ENSG00000211892/ENSG00000211964/ENSG00000211955/ENSG00000100092/ENSG00000275591/ENSG00000224373/ENSG00000211944/ENSG00000211970/ENSG00000211976/ENSG00000224650/ENSG00000211956/ENSG00000211959/ENSG00000211890/ENSG00000211895/ENSG00000211937/ENSG00000206579/ENSG00000211973/ENSG00000280411/ENSG00000211938/ENSG00000211679/ENSG00000128340…
GO:0031123	GO:0031123	RNA 3'-end processing	108	0.44814	2.17924	2.69879e-08	5.30023e-06	4.41648e-06	11277	tags=58%, list=28%, signal=42%	ENSG00000131914/ENSG00000269586/ENSG00000070756/ENSG00000121274/ENSG00000164941/ENSG00000164944/ENSG00000136937/ENSG00000167005/ENSG00000138035/ENSG00000134371/ENSG00000166477/ENSG00000107951/ENSG00000134057/ENSG00000132463/ENSG00000138614/ENSG00000174173/ENSG00000142192/ENSG00000107864/ENSG00000142528/ENSG00000129315/ENSG00000072756/ENSG00000165934/ENSG00000141425/ENSG00000196678/ENSG00000143493…
GO:0006637	GO:0006637	acyl-CoA metabolic process	95	0.455545	2.14758	5.68206e-08	1.04152e-05	8.6786e-06	8382	tags=49%, list=21%, signal=39%	ENSG00000215009/ENSG00000205669/ENSG00000151726/ENSG00000115919/ENSG00000112972/ENSG00000064763/ENSG00000150768/ENSG00000206527/ENSG00000118402/ENSG00000123983/ENSG00000151790/ENSG00000164181/ENSG00000012660/ENSG00000278540/ENSG00000075239/ENSG00000140876/ENSG00000131238/ENSG00000149084/ENSG00000158669/ENSG00000124370/ENSG00000170522/ENSG00000091140/ENSG00000172340/ENSG00000213965/ENSG00000197296…
GO:0035383	GO:0035383	thioester metabolic process	95	0.455545	2.14758	5.68206e-08	1.04152e-05	8.6786e-06	8382	tags=49%, list=21%, signal=39%	ENSG00000215009/ENSG00000205669/ENSG00000151726/ENSG00000115919/ENSG00000112972/ENSG00000064763/ENSG00000150768/ENSG00000206527/ENSG00000118402/ENSG00000123983/ENSG00000151790/ENSG00000164181/ENSG00000012660/ENSG00000278540/ENSG00000075239/ENSG00000140876/ENSG00000131238/ENSG00000149084/ENSG00000158669/ENSG00000124370/ENSG00000170522/ENSG00000091140/ENSG00000172340/ENSG00000213965/ENSG00000197296…
GO:2001243	GO:2001243	negative regulation of intrinsic apoptotic signaling pathway	94	0.462421	2.20377	6.26112e-08	1.11064e-05	9.25454e-06	8488	tags=44%, list=21%, signal=34%	ENSG00000221867/ENSG00000139515/ENSG00000130427/ENSG00000048392/ENSG00000100644/ENSG00000165490/ENSG00000149428/ENSG00000198836/ENSG00000185345/ENSG00000139644/ENSG00000168398/ENSG00000165637/ENSG00000182010/ENSG00000178719/ENSG00000144476/ENSG00000132436/ENSG00000157613/ENSG00000215301/ENSG00000074800/ENSG00000051108/ENSG00000131871/ENSG00000109501/ENSG00000112096/ENSG00000166170/ENSG00000126602…
GO:0007029	GO:0007029	endoplasmic reticulum organization	86	0.477097	2.18753	1.07712e-07	1.8303e-05	1.52512e-05	9090	tags=55%, list=23%, signal=42%	ENSG00000175318/ENSG00000165476/ENSG00000140506/ENSG00000104412/ENSG00000142197/ENSG00000111684/ENSG00000108588/ENSG00000067167/ENSG00000196542/ENSG00000169446/ENSG00000129625/ENSG00000187164/ENSG00000095209/ENSG00000086598/ENSG00000074695/ENSG00000158220/ENSG00000118873/ENSG00000172071/ENSG00000186439/ENSG00000144320/ENSG00000148396/ENSG00000109133/ENSG00000099246/ENSG00000184743/ENSG00000154305…
GO:0043648	GO:0043648	dicarboxylic acid metabolic process	94	0.455461	2.1706	1.09838e-07	1.8303e-05	1.52512e-05	7703	tags=53%, list=19%, signal=43%	ENSG00000117009/ENSG00000128683/ENSG00000065833/ENSG00000136750/ENSG00000100033/ENSG00000115919/ENSG00000065911/ENSG00000166123/ENSG00000136010/ENSG00000198650/ENSG00000130707/ENSG00000091483/ENSG00000182054/ENSG00000138413/ENSG00000159423/ENSG00000001084/ENSG00000182199/ENSG00000107537/ENSG00000120053/ENSG00000023909/ENSG00000065154/ENSG00000151012/ENSG00000091140/ENSG00000196636/ENSG00000124275…
GO:1905897	GO:1905897	regulation of response to endoplasmic reticulum stress	82	0.481471	2.18569	1.36161e-07	2.2022e-05	1.83501e-05	8389	tags=46%, list=21%, signal=37%	ENSG00000221867/ENSG00000139515/ENSG00000178301/ENSG00000111684/ENSG00000149428/ENSG00000198836/ENSG00000198855/ENSG00000172071/ENSG00000012174/ENSG00000158615/ENSG00000185345/ENSG00000128590/ENSG00000139644/ENSG00000109133/ENSG00000207752/ENSG00000178719/ENSG00000135018/ENSG00000058056/ENSG00000014123/ENSG00000157613/ENSG00000118217/ENSG00000132824/ENSG00000044574/ENSG00000051108/ENSG00000131871…
GO:0006099	GO:0006099	tricarboxylic acid cycle	29	0.700617	2.60986	1.75786e-07	2.71984e-05	2.26634e-05	7698	tags=72%, list=19%, signal=58%	ENSG00000150768/ENSG00000166411/ENSG00000091483/ENSG00000182054/ENSG00000181192/ENSG00000138413/ENSG00000136381/ENSG00000062485/ENSG00000143252/ENSG00000172340/ENSG00000136143/ENSG00000112992/ENSG00000204370/ENSG00000105953/ENSG00000014641/ENSG00000100412/ENSG00000146701/ENSG00000122729/ENSG00000163541/ENSG00000119689/ENSG00000131828
GO:0033866	GO:0033866	nucleoside bisphosphate biosynthetic process	59	0.537299	2.35694	1.8795e-07	2.71984e-05	2.26634e-05	9053	tags=53%, list=23%, signal=41%	ENSG00000198682/ENSG00000151726/ENSG00000150768/ENSG00000206527/ENSG00000118402/ENSG00000123983/ENSG00000155850/ENSG00000164181/ENSG00000012660/ENSG00000278540/ENSG00000075239/ENSG00000131238/ENSG00000149084/ENSG00000120137/ENSG00000170522/ENSG00000091140/ENSG00000131473/ENSG00000124786/ENSG00000157593/ENSG00000143158/ENSG00000127125/ENSG00000138801/ENSG00000066322/ENSG00000131069/ENSG00000131828…
GO:0034030	GO:0034030	ribonucleoside bisphosphate biosynthetic process	59	0.537299	2.35694	1.8795e-07	2.71984e-05	2.26634e-05	9053	tags=53%, list=23%, signal=41%	ENSG00000198682/ENSG00000151726/ENSG00000150768/ENSG00000206527/ENSG00000118402/ENSG00000123983/ENSG00000155850/ENSG00000164181/ENSG00000012660/ENSG00000278540/ENSG00000075239/ENSG00000131238/ENSG00000149084/ENSG00000120137/ENSG00000170522/ENSG00000091140/ENSG00000131473/ENSG00000124786/ENSG00000157593/ENSG00000143158/ENSG00000127125/ENSG00000138801/ENSG00000066322/ENSG00000131069/ENSG00000131828…
GO:0034033	GO:0034033	purine nucleoside bisphosphate biosynthetic process	59	0.537299	2.35694	1.8795e-07	2.71984e-05	2.26634e-05	9053	tags=53%, list=23%, signal=41%	ENSG00000198682/ENSG00000151726/ENSG00000150768/ENSG00000206527/ENSG00000118402/ENSG00000123983/ENSG00000155850/ENSG00000164181/ENSG00000012660/ENSG00000278540/ENSG00000075239/ENSG00000131238/ENSG00000149084/ENSG00000120137/ENSG00000170522/ENSG00000091140/ENSG00000131473/ENSG00000124786/ENSG00000157593/ENSG00000143158/ENSG00000127125/ENSG00000138801/ENSG00000066322/ENSG00000131069/ENSG00000131828…
GO:0099024	GO:0099024	plasma membrane invagination	124	-0.559172	-1.75156	2.13961e-07	3.01685e-05	2.51383e-05	6353	tags=43%, list=16%, signal=36%	ENSG00000223648/ENSG00000211957/ENSG00000163219/ENSG00000276775/ENSG00000211892/ENSG00000211964/ENSG00000211955/ENSG00000100092/ENSG00000275591/ENSG00000224373/ENSG00000211944/ENSG00000211970/ENSG00000211976/ENSG00000224650/ENSG00000211956/ENSG00000211959/ENSG00000211890/ENSG00000211895/ENSG00000211937/ENSG00000206579/ENSG00000211973/ENSG00000280411/ENSG00000211938/ENSG00000211679/ENSG00000128340…
GO:0021549	GO:0021549	cerebellum development	98	0.43089	2.08576	2.88212e-07	3.9622e-05	3.30155e-05	7127	tags=42%, list=18%, signal=34%	ENSG00000089116/ENSG00000150361/ENSG00000171798/ENSG00000273706/ENSG00000135472/ENSG00000162992/ENSG00000188613/ENSG00000168505/ENSG00000109819/ENSG00000146938/ENSG00000063015/ENSG00000171450/ENSG00000163064/ENSG00000018236/ENSG00000102924/ENSG00000118193/ENSG00000095139/ENSG00000169032/ENSG00000179295/ENSG00000159131/ENSG00000090861/ENSG00000138311/ENSG00000164494/ENSG00000103494/ENSG00000152208…
GO:0032392	GO:0032392	DNA geometric change	87	0.450977	2.06815	3.25714e-07	4.36854e-05	3.64013e-05	11051	tags=60%, list=28%, signal=43%	ENSG00000136982/ENSG00000029993/ENSG00000104738/ENSG00000112249/ENSG00000133119/ENSG00000116254/ENSG00000145907/ENSG00000144045/ENSG00000004700/ENSG00000104320/ENSG00000197275/ENSG00000197299/ENSG00000051180/ENSG00000186871/ENSG00000020922/ENSG00000178460/ENSG00000073111/ENSG00000076003/ENSG00000215301/ENSG00000163104/ENSG00000135829/ENSG00000134452/ENSG00000163918/ENSG00000138346/ENSG00000177200…
GO:0022037	GO:0022037	metencephalon development	107	0.419835	2.05133	3.87975e-07	4.9869e-05	4.1554e-05	7127	tags=40%, list=18%, signal=33%	ENSG00000089116/ENSG00000150361/ENSG00000171798/ENSG00000273706/ENSG00000135472/ENSG00000162992/ENSG00000188613/ENSG00000168505/ENSG00000109819/ENSG00000139352/ENSG00000146938/ENSG00000063015/ENSG00000171450/ENSG00000163064/ENSG00000018236/ENSG00000102924/ENSG00000118193/ENSG00000095139/ENSG00000169032/ENSG00000179295/ENSG00000159131/ENSG00000090861/ENSG00000138311/ENSG00000164494/ENSG00000103494…
GO:0030968	GO:0030968	endoplasmic reticulum unfolded protein response	74	0.487953	2.12872	3.89956e-07	4.9869e-05	4.1554e-05	10202	tags=62%, list=26%, signal=46%	ENSG00000105550/ENSG00000134398/ENSG00000136986/ENSG00000099219/ENSG00000197930/ENSG00000198855/ENSG00000086598/ENSG00000172071/ENSG00000012174/ENSG00000180667/ENSG00000158615/ENSG00000128590/ENSG00000134001/ENSG00000109133/ENSG00000207752/ENSG00000182158/ENSG00000014123/ENSG00000068912/ENSG00000157613/ENSG00000118217/ENSG00000044574/ENSG00000120742/ENSG00000106638/ENSG00000124164/ENSG00000116761…
GO:0002443	GO:0002443	leukocyte mediated immunity	419	-0.452046	-1.46823	4.13031e-07	5.16195e-05	4.30126e-05	12084	tags=47%, list=31%, signal=33%	ENSG00000270550/ENSG00000139178/ENSG00000211974/ENSG00000116670/ENSG00000172575/ENSG00000110719/ENSG00000205403/ENSG00000277632/ENSG00000130303/ENSG00000232810/ENSG00000104972/ENSG00000168961/ENSG00000173372/ENSG00000115604/ENSG00000211935/ENSG00000105329/ENSG00000159403/ENSG00000170542/ENSG00000211952/ENSG00000092929/ENSG00000274576/ENSG00000105851/ENSG00000206503/ENSG00000174885/ENSG00000150637…
GO:0010324	GO:0010324	membrane invagination	132	-0.544835	-1.70711	6.90922e-07	8.44307e-05	7.03529e-05	6353	tags=40%, list=16%, signal=34%	ENSG00000223648/ENSG00000211957/ENSG00000163219/ENSG00000276775/ENSG00000211892/ENSG00000211964/ENSG00000211955/ENSG00000100092/ENSG00000275591/ENSG00000224373/ENSG00000211944/ENSG00000211970/ENSG00000211976/ENSG00000224650/ENSG00000211956/ENSG00000211959/ENSG00000211890/ENSG00000211895/ENSG00000211937/ENSG00000206579/ENSG00000211973/ENSG00000280411/ENSG00000211938/ENSG00000211679/ENSG00000128340…
GO:0006413	GO:0006413	translational initiation	113	0.400389	2.02986	9.75065e-07	0.000116563	9.71271e-05	8601	tags=48%, list=22%, signal=38%	ENSG00000175766/ENSG00000147677/ENSG00000187840/ENSG00000104408/ENSG00000102580/ENSG00000124374/ENSG00000185728/ENSG00000086598/ENSG00000104131/ENSG00000172071/ENSG00000164163/ENSG00000136937/ENSG00000158615/ENSG00000205609/ENSG00000123908/ENSG00000067248/ENSG00000125977/ENSG00000134001/ENSG00000151247/ENSG00000184110/ENSG00000172239/ENSG00000173674/ENSG00000139726/ENSG00000180574/ENSG00000100129…
GO:0071806	GO:0071806	protein transmembrane transport	59	0.512018	2.24604	1.04001e-06	0.000121681	0.000101392	7465	tags=49%, list=19%, signal=40%	ENSG00000114757/ENSG00000067167/ENSG00000025796/ENSG00000154174/ENSG00000144381/ENSG00000102910/ENSG00000163528/ENSG00000134375/ENSG00000162928/ENSG00000164284/ENSG00000127980/ENSG00000100883/ENSG00000164751/ENSG00000112357/ENSG00000173726/ENSG00000120675/ENSG00000156709/ENSG00000044574/ENSG00000158882/ENSG00000109519/ENSG00000105197/ENSG00000008952/ENSG00000204152/ENSG00000065308/ENSG00000160862…
GO:0006664	GO:0006664	glycolipid metabolic process	98	0.411716	1.99294	1.81711e-06	0.000206735	0.000172265	7280	tags=40%, list=18%, signal=33%	ENSG00000109182/ENSG00000154252/ENSG00000161395/ENSG00000157404/ENSG00000174607/ENSG00000103089/ENSG00000135454/ENSG00000277161/ENSG00000165282/ENSG00000175229/ENSG00000184389/ENSG00000176920/ENSG00000204099/ENSG00000170266/ENSG00000132356/ENSG00000110080/ENSG00000008513/ENSG00000105855/ENSG00000176597/ENSG00000163964/ENSG00000177628/ENSG00000128973/ENSG00000140557/ENSG00000197858/ENSG00000049860…
GO:0031124	GO:0031124	mRNA 3'-end processing	63	0.4968	2.21032	1.84216e-06	0.000206735	0.000172265	11465	tags=63%, list=29%, signal=45%	ENSG00000070756/ENSG00000121274/ENSG00000164944/ENSG00000136937/ENSG00000167005/ENSG00000138035/ENSG00000134371/ENSG00000166477/ENSG00000107951/ENSG00000134057/ENSG00000132463/ENSG00000142192/ENSG00000107864/ENSG00000142528/ENSG00000129315/ENSG00000165934/ENSG00000141425/ENSG00000172409/ENSG00000101413/ENSG00000144231/ENSG00000155827/ENSG00000174953/ENSG00000090060/ENSG00000101138/ENSG00000163950…
GO:0016126	GO:0016126	sterol biosynthetic process	58	0.505157	2.21962	2.05431e-06	0.000224691	0.000187226	8539	tags=59%, list=22%, signal=46%	ENSG00000110243/ENSG00000104549/ENSG00000148377/ENSG00000067064/ENSG00000112972/ENSG00000052802/ENSG00000172893/ENSG00000160211/ENSG00000111684/ENSG00000015520/ENSG00000113161/ENSG00000116133/ENSG00000109929/ENSG00000012174/ENSG00000147475/ENSG00000132356/ENSG00000079459/ENSG00000160752/ENSG00000131473/ENSG00000001630/ENSG00000125629/ENSG00000160285/ENSG00000110921/ENSG00000173409/ENSG00000143815…
GO:0065002	GO:0065002	intracellular protein transmembrane transport	51	0.53613	2.29065	2.09407e-06	0.000224691	0.000187226	6750	tags=51%, list=17%, signal=42%	ENSG00000114757/ENSG00000067167/ENSG00000025796/ENSG00000154174/ENSG00000144381/ENSG00000102910/ENSG00000163528/ENSG00000134375/ENSG00000162928/ENSG00000164284/ENSG00000127980/ENSG00000100883/ENSG00000164751/ENSG00000112357/ENSG00000173726/ENSG00000120675/ENSG00000156709/ENSG00000044574/ENSG00000158882/ENSG00000109519/ENSG00000105197/ENSG00000008952/ENSG00000204152/ENSG00000065308/ENSG00000265354…
GO:1903509	GO:1903509	liposaccharide metabolic process	99	0.402077	1.94284	2.12474e-06	0.000224691	0.000187226	7280	tags=39%, list=18%, signal=32%	ENSG00000109182/ENSG00000154252/ENSG00000161395/ENSG00000157404/ENSG00000174607/ENSG00000103089/ENSG00000135454/ENSG00000277161/ENSG00000165282/ENSG00000175229/ENSG00000184389/ENSG00000176920/ENSG00000204099/ENSG00000170266/ENSG00000132356/ENSG00000110080/ENSG00000008513/ENSG00000105855/ENSG00000176597/ENSG00000163964/ENSG00000177628/ENSG00000128973/ENSG00000140557/ENSG00000197858/ENSG00000049860…
GO:0021695	GO:0021695	cerebellar cortex development	49	0.553295	2.35095	2.4003e-06	0.000249042	0.000207517	5773	tags=41%, list=15%, signal=35%	ENSG00000089116/ENSG00000150361/ENSG00000171798/ENSG00000273706/ENSG00000135472/ENSG00000063015/ENSG00000102924/ENSG00000118193/ENSG00000095139/ENSG00000169032/ENSG00000179295/ENSG00000090861/ENSG00000138311/ENSG00000152208/ENSG00000177628/ENSG00000135049/ENSG00000171532/ENSG00000105887/ENSG00000044574/ENSG00000105953
GO:0006695	GO:0006695	cholesterol biosynthetic process	51	0.531938	2.27274	2.50343e-06	0.000250298	0.000208564	7379	tags=55%, list=19%, signal=45%	ENSG00000110243/ENSG00000148377/ENSG00000067064/ENSG00000112972/ENSG00000052802/ENSG00000172893/ENSG00000160211/ENSG00000111684/ENSG00000015520/ENSG00000113161/ENSG00000116133/ENSG00000109929/ENSG00000012174/ENSG00000147475/ENSG00000132356/ENSG00000079459/ENSG00000160752/ENSG00000131473/ENSG00000001630/ENSG00000125629/ENSG00000160285/ENSG00000110921/ENSG00000173409/ENSG00000143815/ENSG00000149809…
GO:1902653	GO:1902653	secondary alcohol biosynthetic process	51	0.531938	2.27274	2.50343e-06	0.000250298	0.000208564	7379	tags=55%, list=19%, signal=45%	ENSG00000110243/ENSG00000148377/ENSG00000067064/ENSG00000112972/ENSG00000052802/ENSG00000172893/ENSG00000160211/ENSG00000111684/ENSG00000015520/ENSG00000113161/ENSG00000116133/ENSG00000109929/ENSG00000012174/ENSG00000147475/ENSG00000132356/ENSG00000079459/ENSG00000160752/ENSG00000131473/ENSG00000001630/ENSG00000125629/ENSG00000160285/ENSG00000110921/ENSG00000173409/ENSG00000143815/ENSG00000149809…
GO:0032508	GO:0032508	DNA duplex unwinding	81	0.4463	2.03076	2.60681e-06	0.00025598	0.000213298	11051	tags=60%, list=28%, signal=44%	ENSG00000136982/ENSG00000104738/ENSG00000112249/ENSG00000133119/ENSG00000116254/ENSG00000145907/ENSG00000144045/ENSG00000004700/ENSG00000104320/ENSG00000197275/ENSG00000197299/ENSG00000051180/ENSG00000186871/ENSG00000020922/ENSG00000178460/ENSG00000073111/ENSG00000076003/ENSG00000215301/ENSG00000163104/ENSG00000135829/ENSG00000134452/ENSG00000163918/ENSG00000138346/ENSG00000177200/ENSG00000125885…
GO:0015837	GO:0015837	amine transport	97	0.405219	1.95507	2.80688e-06	0.00027079	0.000225639	1754	tags=19%, list=4%, signal=18%	ENSG00000101204/ENSG00000180176/ENSG00000132437/ENSG00000132872/ENSG00000168621/ENSG00000160716/ENSG00000117009/ENSG00000100604/ENSG00000213023/ENSG00000129990/ENSG00000101188/ENSG00000169213/ENSG00000187094/ENSG00000121853/ENSG00000082556/ENSG00000140519/ENSG00000019505/ENSG00000101180
GO:0006984	GO:0006984	ER-nucleus signaling pathway	46	0.558378	2.33645	3.56951e-06	0.000335704	0.000279729	10457	tags=67%, list=26%, signal=50%	ENSG00000111684/ENSG00000108588/ENSG00000174437/ENSG00000111412/ENSG00000086598/ENSG00000172071/ENSG00000012174/ENSG00000147475/ENSG00000158615/ENSG00000143183/ENSG00000134001/ENSG00000109133/ENSG00000198911/ENSG00000125629/ENSG00000082701/ENSG00000118217/ENSG00000044574/ENSG00000131871/ENSG00000106541/ENSG00000109501/ENSG00000107566/ENSG00000196396/ENSG00000160685/ENSG00000144895/ENSG00000153094…
GO:0021517	GO:0021517	ventral spinal cord development	42	0.57309	2.33508	3.60185e-06	0.000335704	0.000279729	6263	tags=38%, list=16%, signal=32%	ENSG00000205927/ENSG00000273706/ENSG00000164690/ENSG00000125820/ENSG00000139352/ENSG00000139915/ENSG00000159556/ENSG00000130675/ENSG00000164532/ENSG00000147852/ENSG00000007372/ENSG00000189056/ENSG00000185920/ENSG00000157193/ENSG00000177468/ENSG00000107187
GO:0021510	GO:0021510	spinal cord development	95	0.402181	1.89601	4.93893e-06	0.000452653	0.000377178	6263	tags=33%, list=16%, signal=28%	ENSG00000089116/ENSG00000205927/ENSG00000273706/ENSG00000168621/ENSG00000164690/ENSG00000154342/ENSG00000077080/ENSG00000125820/ENSG00000139352/ENSG00000139915/ENSG00000159556/ENSG00000145545/ENSG00000130675/ENSG00000148400/ENSG00000164532/ENSG00000147852/ENSG00000165606/ENSG00000178691/ENSG00000007372/ENSG00000120068/ENSG00000136518/ENSG00000196712/ENSG00000110693/ENSG00000189056/ENSG00000185920…
GO:0140053	GO:0140053	mitochondrial gene expression	109	0.382222	1.83147	5.41263e-06	0.000487935	0.000406578	11412	tags=52%, list=29%, signal=37%	ENSG00000155846/ENSG00000061794/ENSG00000067704/ENSG00000162851/ENSG00000138095/ENSG00000108064/ENSG00000182199/ENSG00000106105/ENSG00000117593/ENSG00000132356/ENSG00000138035/ENSG00000168827/ENSG00000171612/ENSG00000174173/ENSG00000164347/ENSG00000215251/ENSG00000139131/ENSG00000085760/ENSG00000072756/ENSG00000124279/ENSG00000103356/ENSG00000182180/ENSG00000243927/ENSG00000136522/ENSG00000204568…
GO:0021515	GO:0021515	cell differentiation in spinal cord	46	0.551547	2.30786	5.66394e-06	0.000502355	0.000418593	2160	tags=26%, list=5%, signal=25%	ENSG00000089116/ENSG00000205927/ENSG00000273706/ENSG00000164690/ENSG00000154342/ENSG00000125820/ENSG00000139352/ENSG00000139915/ENSG00000159556/ENSG00000130675/ENSG00000148400/ENSG00000164532
GO:1903573	GO:1903573	negative regulation of response to endoplasmic reticulum stress	44	0.544184	2.24601	7.49793e-06	0.000642895	0.0005357	6516	tags=43%, list=16%, signal=36%	ENSG00000221867/ENSG00000139515/ENSG00000178301/ENSG00000111684/ENSG00000149428/ENSG00000198836/ENSG00000158615/ENSG00000185345/ENSG00000128590/ENSG00000139644/ENSG00000207752/ENSG00000178719/ENSG00000014123/ENSG00000157613/ENSG00000044574/ENSG00000051108/ENSG00000131871/ENSG00000109501/ENSG00000155313
GO:0150104	GO:0150104	transport across blood-brain barrier	87	0.410409	1.88211	7.5872e-06	0.000642895	0.0005357	4469	tags=28%, list=11%, signal=25%	ENSG00000023839/ENSG00000197106/ENSG00000196517/ENSG00000072274/ENSG00000118160/ENSG00000198049/ENSG00000147100/ENSG00000139514/ENSG00000168389/ENSG00000100170/ENSG00000158296/ENSG00000197496/ENSG00000111371/ENSG00000112759/ENSG00000125257/ENSG00000163406/ENSG00000105281/ENSG00000137860/ENSG00000103257/ENSG00000064651/ENSG00000105641/ENSG00000134294/ENSG00000181856/ENSG00000058668
GO:0006418	GO:0006418	tRNA aminoacylation for protein translation	41	0.551696	2.21226	7.80459e-06	0.000642895	0.0005357	6852	tags=44%, list=17%, signal=36%	ENSG00000136628/ENSG00000113407/ENSG00000137513/ENSG00000067704/ENSG00000196305/ENSG00000090861/ENSG00000106105/ENSG00000117593/ENSG00000166986/ENSG00000134684/ENSG00000133706/ENSG00000139131/ENSG00000134440/ENSG00000247626/ENSG00000113643/ENSG00000103356/ENSG00000115866/ENSG00000116120
GO:1902236	GO:1902236	negative regulation of endoplasmic reticulum stress-induced intrinsic apoptotic signaling pathway	20	0.717409	2.4074	7.87759e-06	0.000642895	0.0005357	8222	tags=65%, list=21%, signal=52%	ENSG00000221867/ENSG00000139515/ENSG00000149428/ENSG00000198836/ENSG00000185345/ENSG00000139644/ENSG00000178719/ENSG00000157613/ENSG00000051108/ENSG00000131871/ENSG00000109501/ENSG00000196396/ENSG00000117862
GO:0006487	GO:0006487	protein N-linked glycosylation	65	0.462496	2.06155	7.88172e-06	0.000642895	0.0005357	7893	tags=46%, list=20%, signal=37%	ENSG00000167080/ENSG00000198380/ENSG00000128039/ENSG00000163527/ENSG00000172269/ENSG00000013375/ENSG00000134910/ENSG00000159063/ENSG00000182050/ENSG00000102158/ENSG00000071073/ENSG00000118705/ENSG00000153989/ENSG00000008513/ENSG00000139133/ENSG00000140650/ENSG00000073849/ENSG00000134851/ENSG00000136731/ENSG00000119523/ENSG00000120697/ENSG00000253710/ENSG00000198856/ENSG00000086848/ENSG00000214160…
GO:0072350	GO:0072350	tricarboxylic acid metabolic process	14	0.80539	2.34909	7.94997e-06	0.000642895	0.0005357	6682	tags=79%, list=17%, signal=65%	ENSG00000131183/ENSG00000166411/ENSG00000130707/ENSG00000182054/ENSG00000138413/ENSG00000136381/ENSG00000062485/ENSG00000131473/ENSG00000100412/ENSG00000148672/ENSG00000122729
GO:1902235	GO:1902235	regulation of endoplasmic reticulum stress-induced intrinsic apoptotic signaling pathway	32	0.616109	2.35422	8.31183e-06	0.000662416	0.000551966	8389	tags=53%, list=21%, signal=42%	ENSG00000221867/ENSG00000139515/ENSG00000149428/ENSG00000198836/ENSG00000172071/ENSG00000185345/ENSG00000139644/ENSG00000178719/ENSG00000157613/ENSG00000132824/ENSG00000051108/ENSG00000131871/ENSG00000109501/ENSG00000096717/ENSG00000196396/ENSG00000117862/ENSG00000153094
GO:0018958	GO:0018958	phenol-containing compound metabolic process	107	0.381289	1.86299	9.29638e-06	0.000730297	0.000608528	3944	tags=21%, list=10%, signal=19%	ENSG00000009765/ENSG00000180176/ENSG00000142319/ENSG00000132437/ENSG00000160716/ENSG00000074317/ENSG00000211452/ENSG00000173404/ENSG00000103316/ENSG00000147100/ENSG00000140254/ENSG00000107165/ENSG00000145545/ENSG00000054277/ENSG00000203668/ENSG00000197165/ENSG00000125686/ENSG00000211448/ENSG00000103876/ENSG00000104044/ENSG00000151012/ENSG00000185345/ENSG00000105641
GO:0036503	GO:0036503	ERAD pathway	106	0.39016	1.89824	9.49418e-06	0.000735331	0.000612723	9708	tags=52%, list=25%, signal=39%	ENSG00000161243/ENSG00000170881/ENSG00000127022/ENSG00000136986/ENSG00000178301/ENSG00000163527/ENSG00000108588/ENSG00000110344/ENSG00000116406/ENSG00000269190/ENSG00000180667/ENSG00000147475/ENSG00000164953/ENSG00000137414/ENSG00000185345/ENSG00000128590/ENSG00000104691/ENSG00000135018/ENSG00000058056/ENSG00000136731/ENSG00000145495/ENSG00000068912/ENSG00000077232/ENSG00000188505/ENSG00000166598…
GO:0010232	GO:0010232	vascular transport	88	0.409961	1.9018	9.86376e-06	0.000751722	0.000626381	4469	tags=27%, list=11%, signal=24%	ENSG00000023839/ENSG00000197106/ENSG00000196517/ENSG00000072274/ENSG00000118160/ENSG00000198049/ENSG00000147100/ENSG00000139514/ENSG00000168389/ENSG00000100170/ENSG00000158296/ENSG00000197496/ENSG00000111371/ENSG00000112759/ENSG00000125257/ENSG00000163406/ENSG00000105281/ENSG00000137860/ENSG00000103257/ENSG00000064651/ENSG00000105641/ENSG00000134294/ENSG00000181856/ENSG00000058668
GO:0043038	GO:0043038	amino acid activation	45	0.537778	2.21675	9.97922e-06	0.000751722	0.000626381	11005	tags=62%, list=28%, signal=45%	ENSG00000136628/ENSG00000113407/ENSG00000137513/ENSG00000067704/ENSG00000196305/ENSG00000090861/ENSG00000106105/ENSG00000117593/ENSG00000166986/ENSG00000134684/ENSG00000133706/ENSG00000139131/ENSG00000134440/ENSG00000247626/ENSG00000113643/ENSG00000103356/ENSG00000115866/ENSG00000116120/ENSG00000157426/ENSG00000185418/ENSG00000146282/ENSG00000112855/ENSG00000130348/ENSG00000204394/ENSG00000065427…
GO:0002931	GO:0002931	response to ischemia	57	0.481838	2.10696	1.03285e-05	0.000767519	0.000639544	7440	tags=46%, list=19%, signal=37%	ENSG00000135472/ENSG00000109819/ENSG00000118160/ENSG00000187848/ENSG00000187840/ENSG00000110218/ENSG00000149428/ENSG00000144381/ENSG00000165474/ENSG00000181019/ENSG00000051382/ENSG00000173250/ENSG00000159200/ENSG00000134318/ENSG00000154277/ENSG00000170615/ENSG00000078237/ENSG00000161011/ENSG00000184719/ENSG00000156709/ENSG00000103319/ENSG00000108179/ENSG00000084093/ENSG00000165660/ENSG00000089041…
GO:0050870	GO:0050870	positive regulation of T cell activation	211	-0.47093	-1.50239	1.14855e-05	0.000842114	0.000701701	10668	tags=45%, list=27%, signal=33%	ENSG00000010610/ENSG00000110492/ENSG00000206503/ENSG00000123338/ENSG00000121807/ENSG00000136244/ENSG00000175467/ENSG00000196839/ENSG00000010810/ENSG00000204287/ENSG00000090776/ENSG00000049768/ENSG00000167604/ENSG00000158473/ENSG00000117281/ENSG00000242574/ENSG00000196735/ENSG00000134242/ENSG00000276231/ENSG00000020633/ENSG00000108947/ENSG00000138795/ENSG00000115457/ENSG00000143184/ENSG00000074047…
GO:0043039	GO:0043039	tRNA aminoacylation	44	0.5344	2.20563	1.26848e-05	0.000908234	0.000756796	11005	tags=61%, list=28%, signal=44%	ENSG00000136628/ENSG00000113407/ENSG00000137513/ENSG00000067704/ENSG00000196305/ENSG00000090861/ENSG00000106105/ENSG00000117593/ENSG00000166986/ENSG00000134684/ENSG00000133706/ENSG00000139131/ENSG00000134440/ENSG00000247626/ENSG00000113643/ENSG00000103356/ENSG00000115866/ENSG00000116120/ENSG00000185418/ENSG00000146282/ENSG00000112855/ENSG00000130348/ENSG00000204394/ENSG00000065427/ENSG00000257218…
GO:0009225	GO:0009225	nucleotide-sugar metabolic process	36	0.583112	2.27881	1.27176e-05	0.000908234	0.000756796	9447	tags=56%, list=24%, signal=42%	ENSG00000167080/ENSG00000100522/ENSG00000198380/ENSG00000172269/ENSG00000013375/ENSG00000169764/ENSG00000117143/ENSG00000140650/ENSG00000136731/ENSG00000227345/ENSG00000117620/ENSG00000000419/ENSG00000159921/ENSG00000109814/ENSG00000095380/ENSG00000147408/ENSG00000115652/ENSG00000104522/ENSG00000102595/ENSG00000088451
GO:0007062	GO:0007062	sister chromatid cohesion	56	0.481485	2.07316	1.5704e-05	0.00110688	0.00092232	9839	tags=66%, list=25%, signal=50%	ENSG00000164754/ENSG00000077935/ENSG00000136982/ENSG00000176635/ENSG00000129810/ENSG00000156831/ENSG00000171320/ENSG00000121579/ENSG00000156970/ENSG00000020922/ENSG00000169679/ENSG00000143452/ENSG00000072501/ENSG00000198887/ENSG00000177602/ENSG00000163535/ENSG00000244588/ENSG00000083642/ENSG00000133302/ENSG00000139687/ENSG00000121892/ENSG00000146670/ENSG00000164190/ENSG00000102974/ENSG00000197771…
GO:0030433	GO:0030433	ubiquitin-dependent ERAD pathway	84	0.410159	1.8649	1.59017e-05	0.00110688	0.00092232	9708	tags=52%, list=25%, signal=40%	ENSG00000161243/ENSG00000127022/ENSG00000136986/ENSG00000163527/ENSG00000108588/ENSG00000110344/ENSG00000116406/ENSG00000269190/ENSG00000180667/ENSG00000147475/ENSG00000164953/ENSG00000137414/ENSG00000128590/ENSG00000104691/ENSG00000135018/ENSG00000145495/ENSG00000068912/ENSG00000077232/ENSG00000188505/ENSG00000166598/ENSG00000100350/ENSG00000144224/ENSG00000044574/ENSG00000164031/ENSG00000113194…
GO:0071548	GO:0071548	response to dexamethasone	38	0.557558	2.22865	1.72219e-05	0.00118379	0.000986404	6054	tags=45%, list=15%, signal=38%	ENSG00000023839/ENSG00000163347/ENSG00000130427/ENSG00000121853/ENSG00000145545/ENSG00000156804/ENSG00000130707/ENSG00000165474/ENSG00000078401/ENSG00000088305/ENSG00000151247/ENSG00000177628/ENSG00000138592/ENSG00000066926/ENSG00000132646/ENSG00000100889/ENSG00000146648
GO:0072384	GO:0072384	organelle transport along microtubule	85	0.396807	1.83128	2.09914e-05	0.00142508	0.00118747	8355	tags=46%, list=21%, signal=36%	ENSG00000158560/ENSG00000131711/ENSG00000155980/ENSG00000100644/ENSG00000103723/ENSG00000138095/ENSG00000198836/ENSG00000170759/ENSG00000124333/ENSG00000154277/ENSG00000107863/ENSG00000177879/ENSG00000138069/ENSG00000181789/ENSG00000175582/ENSG00000132842/ENSG00000072803/ENSG00000102401/ENSG00000126858/ENSG00000070718/ENSG00000135049/ENSG00000075945/ENSG00000131437/ENSG00000185009/ENSG00000100285…
GO:0051983	GO:0051983	regulation of chromosome segregation	86	0.411736	1.88784	2.17988e-05	0.00144827	0.00120678	10177	tags=59%, list=26%, signal=44%	ENSG00000164754/ENSG00000121101/ENSG00000156831/ENSG00000086827/ENSG00000174442/ENSG00000164109/ENSG00000058729/ENSG00000138778/ENSG00000156970/ENSG00000112029/ENSG00000117724/ENSG00000138411/ENSG00000134057/ENSG00000148773/ENSG00000153107/ENSG00000169679/ENSG00000143452/ENSG00000094804/ENSG00000119408/ENSG00000094880/ENSG00000112742/ENSG00000004897/ENSG00000036257/ENSG00000126787/ENSG00000198887…
GO:1901570	GO:1901570	fatty acid derivative biosynthetic process	50	0.47669	2.01436	2.18596e-05	0.00144827	0.00120678	3453	tags=34%, list=9%, signal=31%	ENSG00000147160/ENSG00000161905/ENSG00000179593/ENSG00000151726/ENSG00000064763/ENSG00000111058/ENSG00000206527/ENSG00000118402/ENSG00000123983/ENSG00000164181/ENSG00000081760/ENSG00000012660/ENSG00000149435/ENSG00000278540/ENSG00000131238/ENSG00000149084/ENSG00000170522
GO:0035384	GO:0035384	thioester biosynthetic process	44	0.520037	2.14635	2.76738e-05	0.00179033	0.00149181	8356	tags=50%, list=21%, signal=39%	ENSG00000151726/ENSG00000150768/ENSG00000206527/ENSG00000118402/ENSG00000123983/ENSG00000164181/ENSG00000012660/ENSG00000278540/ENSG00000075239/ENSG00000131238/ENSG00000149084/ENSG00000170522/ENSG00000091140/ENSG00000131473/ENSG00000143158/ENSG00000127125/ENSG00000066322/ENSG00000131069/ENSG00000131828/ENSG00000152256/ENSG00000103740/ENSG00000110435
GO:0071616	GO:0071616	acyl-CoA biosynthetic process	44	0.520037	2.14635	2.76738e-05	0.00179033	0.00149181	8356	tags=50%, list=21%, signal=39%	ENSG00000151726/ENSG00000150768/ENSG00000206527/ENSG00000118402/ENSG00000123983/ENSG00000164181/ENSG00000012660/ENSG00000278540/ENSG00000075239/ENSG00000131238/ENSG00000149084/ENSG00000170522/ENSG00000091140/ENSG00000131473/ENSG00000143158/ENSG00000127125/ENSG00000066322/ENSG00000131069/ENSG00000131828/ENSG00000152256/ENSG00000103740/ENSG00000110435
GO:0000266	GO:0000266	mitochondrial fission	42	0.527892	2.15092	2.79994e-05	0.00179033	0.00149181	10628	tags=69%, list=27%, signal=51%	ENSG00000109819/ENSG00000104381/ENSG00000166575/ENSG00000066855/ENSG00000176171/ENSG00000198836/ENSG00000153310/ENSG00000069329/ENSG00000185345/ENSG00000164209/ENSG00000132842/ENSG00000087470/ENSG00000100335/ENSG00000134278/ENSG00000198060/ENSG00000247077/ENSG00000146410/ENSG00000006451/ENSG00000087586/ENSG00000166323/ENSG00000017797/ENSG00000156026/ENSG00000128052/ENSG00000102967/ENSG00000006695…
GO:0006900	GO:0006900	vesicle budding from membrane	60	0.458756	2.00238	2.96345e-05	0.0018731	0.00156079	9121	tags=62%, list=23%, signal=48%	ENSG00000113615/ENSG00000101310/ENSG00000086598/ENSG00000163558/ENSG00000164695/ENSG00000152700/ENSG00000113384/ENSG00000073921/ENSG00000185345/ENSG00000176986/ENSG00000150961/ENSG00000138069/ENSG00000132842/ENSG00000181856/ENSG00000182718/ENSG00000196535/ENSG00000154305/ENSG00000242247/ENSG00000106299/ENSG00000036257/ENSG00000138674/ENSG00000124164/ENSG00000138802/ENSG00000143761/ENSG00000197747…
GO:0036465	GO:0036465	synaptic vesicle recycling	75	0.414936	1.80427	3.21924e-05	0.00201166	0.00167624	6555	tags=29%, list=17%, signal=25%	ENSG00000154342/ENSG00000074317/ENSG00000170835/ENSG00000179869/ENSG00000129990/ENSG00000102003/ENSG00000146938/ENSG00000127022/ENSG00000073921/ENSG00000144566/ENSG00000132842/ENSG00000181856/ENSG00000159082/ENSG00000137055/ENSG00000087470/ENSG00000078269/ENSG00000273749/ENSG00000117533/ENSG00000041353/ENSG00000198668/ENSG00000157107/ENSG00000116675
GO:0042110	GO:0042110	T cell activation	465	-0.417019	-1.35718	3.56402e-05	0.00217767	0.00181457	10727	tags=36%, list=27%, signal=26%	ENSG00000118046/ENSG00000010610/ENSG00000105851/ENSG00000110492/ENSG00000206503/ENSG00000163874/ENSG00000123338/ENSG00000136167/ENSG00000205220/ENSG00000134545/ENSG00000121807/ENSG00000136244/ENSG00000175467/ENSG00000196839/ENSG00000010810/ENSG00000147437/ENSG00000169508/ENSG00000204287/ENSG00000090776/ENSG00000049768/ENSG00000167604/ENSG00000158473/ENSG00000117281/ENSG00000242574/ENSG00000196735…
GO:0032543	GO:0032543	mitochondrial translation	76	0.410657	1.80565	3.56411e-05	0.00217767	0.00181457	11412	tags=53%, list=29%, signal=38%	ENSG00000061794/ENSG00000067704/ENSG00000138095/ENSG00000182199/ENSG00000106105/ENSG00000117593/ENSG00000168827/ENSG00000174173/ENSG00000164347/ENSG00000139131/ENSG00000085760/ENSG00000124279/ENSG00000103356/ENSG00000182180/ENSG00000243927/ENSG00000136522/ENSG00000204568/ENSG00000182768/ENSG00000135900/ENSG00000108561/ENSG00000113048/ENSG00000181991/ENSG00000118246/ENSG00000147586/ENSG00000112031…
GO:0051937	GO:0051937	catecholamine transport	72	0.418912	1.83843	3.74002e-05	0.00226004	0.0018832	1754	tags=18%, list=4%, signal=17%	ENSG00000101204/ENSG00000142319/ENSG00000132872/ENSG00000168621/ENSG00000160716/ENSG00000100604/ENSG00000213023/ENSG00000129990/ENSG00000169213/ENSG00000121853/ENSG00000082556/ENSG00000019505/ENSG00000101180
GO:0035337	GO:0035337	fatty-acyl-CoA metabolic process	38	0.539023	2.15456	3.90635e-05	0.00233489	0.00194557	4021	tags=37%, list=10%, signal=33%	ENSG00000151726/ENSG00000064763/ENSG00000206527/ENSG00000118402/ENSG00000123983/ENSG00000164181/ENSG00000012660/ENSG00000278540/ENSG00000140876/ENSG00000131238/ENSG00000149084/ENSG00000170522/ENSG00000213965/ENSG00000197296
GO:0070059	GO:0070059	intrinsic apoptotic signaling pathway in response to endoplasmic reticulum stress	63	0.447358	1.99034	4.75928e-05	0.00280381	0.00233631	8615	tags=43%, list=22%, signal=34%	ENSG00000221867/ENSG00000139515/ENSG00000134398/ENSG00000128965/ENSG00000197930/ENSG00000149428/ENSG00000101255/ENSG00000198836/ENSG00000172071/ENSG00000185345/ENSG00000139644/ENSG00000178719/ENSG00000077232/ENSG00000078140/ENSG00000157613/ENSG00000132824/ENSG00000156709/ENSG00000051108/ENSG00000131871/ENSG00000109501/ENSG00000136848/ENSG00000178607/ENSG00000096717/ENSG00000196396/ENSG00000117862…
GO:0034502	GO:0034502	protein localization to chromosome	91	0.391069	1.87248	4.8038e-05	0.00280381	0.00233631	8558	tags=48%, list=22%, signal=38%	ENSG00000164754/ENSG00000172167/ENSG00000137812/ENSG00000086827/ENSG00000171320/ENSG00000120438/ENSG00000174442/ENSG00000150753/ENSG00000198824/ENSG00000156970/ENSG00000139618/ENSG00000095002/ENSG00000156261/ENSG00000152422/ENSG00000031691/ENSG00000115484/ENSG00000175073/ENSG00000166226/ENSG00000147601/ENSG00000112742/ENSG00000170312/ENSG00000198887/ENSG00000177602/ENSG00000175054/ENSG00000040275…
GO:0034311	GO:0034311	diol metabolic process	28	0.603612	2.21791	4.84382e-05	0.00280381	0.00233631	5514	tags=54%, list=14%, signal=46%	ENSG00000138669/ENSG00000078124/ENSG00000188611/ENSG00000138744/ENSG00000100596/ENSG00000177076/ENSG00000228716/ENSG00000177628/ENSG00000163082/ENSG00000131979/ENSG00000150787/ENSG00000204147/ENSG00000172296/ENSG00000090054/ENSG00000126821
GO:0043631	GO:0043631	RNA polyadenylation	46	0.508023	2.12575	5.29933e-05	0.00303552	0.00252938	11277	tags=61%, list=28%, signal=44%	ENSG00000070756/ENSG00000121274/ENSG00000164944/ENSG00000167005/ENSG00000138035/ENSG00000134371/ENSG00000166477/ENSG00000107951/ENSG00000132463/ENSG00000142192/ENSG00000107864/ENSG00000129315/ENSG00000165934/ENSG00000172409/ENSG00000155827/ENSG00000090060/ENSG00000214575/ENSG00000115421/ENSG00000165494/ENSG00000101811/ENSG00000213079/ENSG00000112941/ENSG00000185122/ENSG00000111605/ENSG00000119203…
GO:0008156	GO:0008156	negative regulation of DNA replication	30	0.594545	2.25833	5.48301e-05	0.00310836	0.00259008	10209	tags=67%, list=26%, signal=50%	ENSG00000107937/ENSG00000197299/ENSG00000112029/ENSG00000139618/ENSG00000075131/ENSG00000147601/ENSG00000094804/ENSG00000112312/ENSG00000175054/ENSG00000159147/ENSG00000134452/ENSG00000111602/ENSG00000121892/ENSG00000005156/ENSG00000062650/ENSG00000197548/ENSG00000121988/ENSG00000152942/ENSG00000163191/ENSG00000172716
GO:0035094	GO:0035094	response to nicotine	45	0.507736	2.09291	5.5621e-05	0.00312102	0.00260063	1945	tags=20%, list=5%, signal=19%	ENSG00000101204/ENSG00000214415/ENSG00000180176/ENSG00000142319/ENSG00000160716/ENSG00000139515/ENSG00000169684/ENSG00000131771/ENSG00000120903
GO:1901568	GO:1901568	fatty acid derivative metabolic process	74	0.413217	1.80268	5.71967e-05	0.00314965	0.00262448	4235	tags=32%, list=11%, signal=29%	ENSG00000147160/ENSG00000161905/ENSG00000179593/ENSG00000151726/ENSG00000064763/ENSG00000107165/ENSG00000111058/ENSG00000206527/ENSG00000083720/ENSG00000118402/ENSG00000123983/ENSG00000164181/ENSG00000081760/ENSG00000012660/ENSG00000149435/ENSG00000278540/ENSG00000075239/ENSG00000140876/ENSG00000131238/ENSG00000149084/ENSG00000170522/ENSG00000213965/ENSG00000197296/ENSG00000167741
GO:0021522	GO:0021522	spinal cord motor neuron differentiation	29	0.598226	2.22845	5.72768e-05	0.00314965	0.00262448	2160	tags=24%, list=5%, signal=23%	ENSG00000205927/ENSG00000164690/ENSG00000125820/ENSG00000139915/ENSG00000159556/ENSG00000130675/ENSG00000164532
GO:0021680	GO:0021680	cerebellar Purkinje cell layer development	26	0.639595	2.28816	5.79497e-05	0.0031551	0.00262903	5607	tags=42%, list=14%, signal=36%	ENSG00000089116/ENSG00000150361/ENSG00000273706/ENSG00000135472/ENSG00000063015/ENSG00000118193/ENSG00000095139/ENSG00000090861/ENSG00000177628/ENSG00000135049/ENSG00000044574
GO:0021697	GO:0021697	cerebellar cortex formation	24	0.634479	2.18161	5.95339e-05	0.00319752	0.00266437	5587	tags=46%, list=14%, signal=39%	ENSG00000089116/ENSG00000171798/ENSG00000273706/ENSG00000135472/ENSG00000102924/ENSG00000169032/ENSG00000179295/ENSG00000152208/ENSG00000177628/ENSG00000135049/ENSG00000105887
GO:0007091	GO:0007091	metaphase/anaphase transition of mitotic cell cycle	61	0.438838	1.91612	5.98916e-05	0.00319752	0.00266437	9532	tags=57%, list=24%, signal=44%	ENSG00000164754/ENSG00000121101/ENSG00000156831/ENSG00000086827/ENSG00000174442/ENSG00000164109/ENSG00000058729/ENSG00000138778/ENSG00000156970/ENSG00000112029/ENSG00000117724/ENSG00000138411/ENSG00000134057/ENSG00000153107/ENSG00000169679/ENSG00000094804/ENSG00000119408/ENSG00000094880/ENSG00000112742/ENSG00000004897/ENSG00000036257/ENSG00000126787/ENSG00000134982/ENSG00000040275/ENSG00000071539…
GO:1903039	GO:1903039	positive regulation of leukocyte cell-cell adhesion	233	-0.458161	-1.46415	6.50591e-05	0.00344	0.00286642	10668	tags=46%, list=27%, signal=34%	ENSG00000002330/ENSG00000141293/ENSG00000232810/ENSG00000104972/ENSG00000168961/ENSG00000140835/ENSG00000204472/ENSG00000010610/ENSG00000110492/ENSG00000206503/ENSG00000123338/ENSG00000121807/ENSG00000136244/ENSG00000175467/ENSG00000196839/ENSG00000010810/ENSG00000012779/ENSG00000204287/ENSG00000090776/ENSG00000049768/ENSG00000167604/ENSG00000158473/ENSG00000117281/ENSG00000242574/ENSG00000160255…
GO:0006378	GO:0006378	mRNA polyadenylation	45	0.505428	2.0834	6.61319e-05	0.00346342	0.00288593	11277	tags=60%, list=28%, signal=43%	ENSG00000070756/ENSG00000121274/ENSG00000164944/ENSG00000167005/ENSG00000138035/ENSG00000134371/ENSG00000166477/ENSG00000107951/ENSG00000132463/ENSG00000142192/ENSG00000107864/ENSG00000129315/ENSG00000165934/ENSG00000172409/ENSG00000155827/ENSG00000090060/ENSG00000214575/ENSG00000115421/ENSG00000165494/ENSG00000101811/ENSG00000213079/ENSG00000185122/ENSG00000111605/ENSG00000119203/ENSG00000176102…
GO:0006672	GO:0006672	ceramide metabolic process	102	0.360039	1.75258	7.08983e-05	0.00365478	0.00304539	5450	tags=31%, list=14%, signal=27%	ENSG00000156413/ENSG00000170835/ENSG00000171124/ENSG00000144452/ENSG00000174607/ENSG00000103089/ENSG00000143753/ENSG00000172057/ENSG00000078124/ENSG00000165389/ENSG00000188611/ENSG00000172292/ENSG00000135454/ENSG00000196542/ENSG00000204099/ENSG00000100596/ENSG00000143418/ENSG00000177076/ENSG00000132356/ENSG00000008513/ENSG00000105855/ENSG00000177628/ENSG00000128973/ENSG00000140557/ENSG00000198964…
GO:0009247	GO:0009247	glycolipid biosynthetic process	67	0.435932	1.95466	7.16597e-05	0.00365478	0.00304539	7202	tags=42%, list=18%, signal=34%	ENSG00000109182/ENSG00000154252/ENSG00000161395/ENSG00000174607/ENSG00000103089/ENSG00000135454/ENSG00000277161/ENSG00000165282/ENSG00000175229/ENSG00000184389/ENSG00000132356/ENSG00000110080/ENSG00000008513/ENSG00000176597/ENSG00000163964/ENSG00000140557/ENSG00000197858/ENSG00000143315/ENSG00000197121/ENSG00000087111/ENSG00000000419/ENSG00000197563/ENSG00000118276/ENSG00000165195/ENSG00000158470…
GO:0015872	GO:0015872	dopamine transport	50	0.45436	1.92	7.17797e-05	0.00365478	0.00304539	1556	tags=20%, list=4%, signal=19%	ENSG00000101204/ENSG00000142319/ENSG00000132872/ENSG00000168621/ENSG00000160716/ENSG00000213023/ENSG00000129990/ENSG00000169213/ENSG00000082556/ENSG00000019505
GO:0008608	GO:0008608	attachment of spindle microtubules to kinetochore	35	0.541418	2.07386	7.53959e-05	0.00373589	0.00311297	10568	tags=66%, list=27%, signal=48%	ENSG00000121101/ENSG00000114346/ENSG00000137812/ENSG00000161800/ENSG00000129810/ENSG00000117650/ENSG00000143228/ENSG00000176623/ENSG00000138778/ENSG00000198824/ENSG00000134057/ENSG00000128944/ENSG00000085415/ENSG00000134982/ENSG00000139687/ENSG00000165660/ENSG00000142945/ENSG00000167842/ENSG00000080986/ENSG00000010244/ENSG00000126581/ENSG00000076382/ENSG00000143924
GO:0045931	GO:0045931	positive regulation of mitotic cell cycle	109	0.347806	1.66656	7.54783e-05	0.00373589	0.00311297	11385	tags=61%, list=29%, signal=43%	ENSG00000172167/ENSG00000137710/ENSG00000182621/ENSG00000187840/ENSG00000156831/ENSG00000103769/ENSG00000179295/ENSG00000138594/ENSG00000112029/ENSG00000139618/ENSG00000151247/ENSG00000143476/ENSG00000134057/ENSG00000124422/ENSG00000142192/ENSG00000094804/ENSG00000112562/ENSG00000094880/ENSG00000170312/ENSG00000004897/ENSG00000185630/ENSG00000036257/ENSG00000126787/ENSG00000215301/ENSG00000036672…
GO:0070936	GO:0070936	protein K48-linked ubiquitination	65	0.426876	1.90277	7.59676e-05	0.00373589	0.00311297	10851	tags=57%, list=27%, signal=41%	ENSG00000077152/ENSG00000104517/ENSG00000185345/ENSG00000140367/ENSG00000072401/ENSG00000127870/ENSG00000176641/ENSG00000120696/ENSG00000165572/ENSG00000145495/ENSG00000077721/ENSG00000078140/ENSG00000036257/ENSG00000119048/ENSG00000170142/ENSG00000078747/ENSG00000114062/ENSG00000113558/ENSG00000110330/ENSG00000132388/ENSG00000109332/ENSG00000119401/ENSG00000196262/ENSG00000159461/ENSG00000186591…
GO:0034698	GO:0034698	response to gonadotropin	26	0.63315	2.26511	7.60901e-05	0.00373589	0.00311297	6194	tags=65%, list=16%, signal=55%	ENSG00000109819/ENSG00000121853/ENSG00000112972/ENSG00000145545/ENSG00000184937/ENSG00000069702/ENSG00000148400/ENSG00000001084/ENSG00000165474/ENSG00000145386/ENSG00000023909/ENSG00000105641/ENSG00000130368/ENSG00000122641/ENSG00000070886/ENSG00000136943/ENSG00000141448
GO:0071459	GO:0071459	protein localization to chromosome, centromeric region	25	0.629565	2.1974	8.11291e-05	0.00394804	0.00328975	9058	tags=64%, list=23%, signal=49%	ENSG00000172167/ENSG00000137812/ENSG00000086827/ENSG00000174442/ENSG00000198824/ENSG00000156970/ENSG00000031691/ENSG00000112742/ENSG00000170312/ENSG00000198887/ENSG00000177602/ENSG00000040275/ENSG00000139687/ENSG00000102974/ENSG00000167842/ENSG00000080986
GO:0002764	GO:0002764	immune response-regulating signaling pathway	442	-0.414106	-1.347	8.85531e-05	0.00427152	0.00355929	13316	tags=40%, list=34%, signal=27%	ENSG00000111801/ENSG00000087088/ENSG00000170458/ENSG00000211945/ENSG00000100906/ENSG00000077264/ENSG00000131378/ENSG00000101096/ENSG00000026950/ENSG00000174775/ENSG00000011600/ENSG00000000938/ENSG00000072694/ENSG00000166523/ENSG00000118503/ENSG00000162511/ENSG00000239961/ENSG00000197943/ENSG00000054148/ENSG00000270550/ENSG00000124508/ENSG00000211974/ENSG00000068079/ENSG00000205846/ENSG00000163606…
GO:0051952	GO:0051952	regulation of amine transport	89	0.372852	1.76203	9.10931e-05	0.00435583	0.00362955	1754	tags=17%, list=4%, signal=16%	ENSG00000101204/ENSG00000132872/ENSG00000168621/ENSG00000160716/ENSG00000117009/ENSG00000100604/ENSG00000213023/ENSG00000129990/ENSG00000101188/ENSG00000169213/ENSG00000187094/ENSG00000121853/ENSG00000082556/ENSG00000019505/ENSG00000101180
GO:0006270	GO:0006270	DNA replication initiation	35	0.537875	2.06029	9.29633e-05	0.00440694	0.00367214	8893	tags=60%, list=22%, signal=47%	ENSG00000175305/ENSG00000104738/ENSG00000065328/ENSG00000140534/ENSG00000104320/ENSG00000073111/ENSG00000094804/ENSG00000076003/ENSG00000163781/ENSG00000093009/ENSG00000181938/ENSG00000135336/ENSG00000185129/ENSG00000164815/ENSG00000091651/ENSG00000085840/ENSG00000115947/ENSG00000101868/ENSG00000136504/ENSG00000173145/ENSG00000112118
GO:1902969	GO:1902969	mitotic DNA replication	14	0.750769	2.18978	9.38939e-05	0.00441301	0.00367719	8893	tags=79%, list=22%, signal=61%	ENSG00000104738/ENSG00000084073/ENSG00000051180/ENSG00000139618/ENSG00000101003/ENSG00000073111/ENSG00000076003/ENSG00000093009/ENSG00000181938/ENSG00000101868/ENSG00000112118
GO:0031398	GO:0031398	positive regulation of protein ubiquitination	114	0.355765	1.80224	9.77828e-05	0.00455684	0.00379704	8769	tags=41%, list=22%, signal=32%	ENSG00000046774/ENSG00000163362/ENSG00000136986/ENSG00000140525/ENSG00000175093/ENSG00000101197/ENSG00000101255/ENSG00000164287/ENSG00000043093/ENSG00000102471/ENSG00000010072/ENSG00000012048/ENSG00000185345/ENSG00000008405/ENSG00000072401/ENSG00000050748/ENSG00000163743/ENSG00000135018/ENSG00000106305/ENSG00000177889/ENSG00000044574/ENSG00000036257/ENSG00000131507/ENSG00000215301/ENSG00000101843…
GO:0006275	GO:0006275	regulation of DNA replication	105	0.354507	1.72913	0.000103314	0.00477414	0.00397811	8884	tags=52%, list=22%, signal=41%	ENSG00000138798/ENSG00000136982/ENSG00000133119/ENSG00000171320/ENSG00000084073/ENSG00000145386/ENSG00000107937/ENSG00000140534/ENSG00000104320/ENSG00000197299/ENSG00000112029/ENSG00000139618/ENSG00000075131/ENSG00000130368/ENSG00000124882/ENSG00000123268/ENSG00000165891/ENSG00000147601/ENSG00000094804/ENSG00000170312/ENSG00000116161/ENSG00000129173/ENSG00000132646/ENSG00000112312/ENSG00000175054…
GO:0030071	GO:0030071	regulation of mitotic metaphase/anaphase transition	59	0.439542	1.92812	0.000105718	0.00481544	0.00401252	9532	tags=58%, list=24%, signal=44%	ENSG00000164754/ENSG00000121101/ENSG00000156831/ENSG00000086827/ENSG00000174442/ENSG00000164109/ENSG00000058729/ENSG00000138778/ENSG00000156970/ENSG00000112029/ENSG00000117724/ENSG00000138411/ENSG00000134057/ENSG00000169679/ENSG00000094804/ENSG00000119408/ENSG00000094880/ENSG00000112742/ENSG00000004897/ENSG00000036257/ENSG00000126787/ENSG00000134982/ENSG00000040275/ENSG00000071539/ENSG00000139687…
GO:1902099	GO:1902099	regulation of metaphase/anaphase transition of cell cycle	61	0.428612	1.87147	0.000105959	0.00481544	0.00401252	9532	tags=56%, list=24%, signal=42%	ENSG00000164754/ENSG00000121101/ENSG00000156831/ENSG00000086827/ENSG00000174442/ENSG00000164109/ENSG00000058729/ENSG00000138778/ENSG00000156970/ENSG00000112029/ENSG00000117724/ENSG00000138411/ENSG00000134057/ENSG00000169679/ENSG00000094804/ENSG00000119408/ENSG00000094880/ENSG00000112742/ENSG00000004897/ENSG00000036257/ENSG00000126787/ENSG00000134982/ENSG00000040275/ENSG00000071539/ENSG00000139687…
GO:0006084	GO:0006084	acetyl-CoA metabolic process	34	0.548694	2.13924	0.000108245	0.00486675	0.00405527	8356	tags=59%, list=21%, signal=46%	ENSG00000115919/ENSG00000112972/ENSG00000150768/ENSG00000151790/ENSG00000278540/ENSG00000075239/ENSG00000140876/ENSG00000091140/ENSG00000131473/ENSG00000110921/ENSG00000143158/ENSG00000127125/ENSG00000119689/ENSG00000169710/ENSG00000131069/ENSG00000109576/ENSG00000179761/ENSG00000131828/ENSG00000152256/ENSG00000110435
GO:0050863	GO:0050863	regulation of T cell activation	319	-0.431791	-1.39067	0.000108858	0.00486675	0.00405527	10523	tags=38%, list=27%, signal=28%	ENSG00000110492/ENSG00000206503/ENSG00000163874/ENSG00000123338/ENSG00000121807/ENSG00000136244/ENSG00000175467/ENSG00000196839/ENSG00000010810/ENSG00000147437/ENSG00000204287/ENSG00000090776/ENSG00000049768/ENSG00000167604/ENSG00000158473/ENSG00000117281/ENSG00000242574/ENSG00000196735/ENSG00000134242/ENSG00000276231/ENSG00000020633/ENSG00000152495/ENSG00000108947/ENSG00000138795/ENSG00000115457…
GO:0030326	GO:0030326	embryonic limb morphogenesis	115	0.342363	1.72145	0.00011634	0.00507828	0.00423153	5984	tags=27%, list=15%, signal=23%	ENSG00000164690/ENSG00000164651/ENSG00000006377/ENSG00000170178/ENSG00000106031/ENSG00000128714/ENSG00000138829/ENSG00000163064/ENSG00000121039/ENSG00000164930/ENSG00000104331/ENSG00000166923/ENSG00000134323/ENSG00000148400/ENSG00000069011/ENSG00000125686/ENSG00000150893/ENSG00000105880/ENSG00000005073/ENSG00000083307/ENSG00000144320/ENSG00000103494/ENSG00000205084/ENSG00000162769/ENSG00000105983…
GO:0035113	GO:0035113	embryonic appendage morphogenesis	115	0.342363	1.72145	0.00011634	0.00507828	0.00423153	5984	tags=27%, list=15%, signal=23%	ENSG00000164690/ENSG00000164651/ENSG00000006377/ENSG00000170178/ENSG00000106031/ENSG00000128714/ENSG00000138829/ENSG00000163064/ENSG00000121039/ENSG00000164930/ENSG00000104331/ENSG00000166923/ENSG00000134323/ENSG00000148400/ENSG00000069011/ENSG00000125686/ENSG00000150893/ENSG00000105880/ENSG00000005073/ENSG00000083307/ENSG00000144320/ENSG00000103494/ENSG00000205084/ENSG00000162769/ENSG00000105983…
GO:0048663	GO:0048663	neuron fate commitment	57	0.434122	1.89831	0.000116697	0.00507828	0.00423153	2379	tags=26%, list=6%, signal=25%	ENSG00000205927/ENSG00000164690/ENSG00000184221/ENSG00000164438/ENSG00000144355/ENSG00000125820/ENSG00000186487/ENSG00000139352/ENSG00000159556/ENSG00000104413/ENSG00000130675/ENSG00000273604/ENSG00000148400/ENSG00000184486/ENSG00000106799
GO:0000959	GO:0000959	mitochondrial RNA metabolic process	50	0.446832	1.88819	0.000117283	0.00507828	0.00423153	11194	tags=58%, list=28%, signal=42%	ENSG00000155846/ENSG00000162851/ENSG00000138095/ENSG00000108064/ENSG00000106105/ENSG00000117593/ENSG00000132356/ENSG00000138035/ENSG00000132463/ENSG00000171612/ENSG00000174173/ENSG00000215251/ENSG00000139131/ENSG00000174840/ENSG00000072756/ENSG00000124279/ENSG00000103356/ENSG00000156502/ENSG00000118246/ENSG00000130349/ENSG00000101574/ENSG00000165526/ENSG00000171103/ENSG00000172171/ENSG00000101391…
GO:0044784	GO:0044784	metaphase/anaphase transition of cell cycle	63	0.42825	1.90533	0.000122792	0.00527524	0.00439565	9532	tags=56%, list=24%, signal=42%	ENSG00000164754/ENSG00000121101/ENSG00000156831/ENSG00000086827/ENSG00000174442/ENSG00000164109/ENSG00000058729/ENSG00000138778/ENSG00000156970/ENSG00000112029/ENSG00000117724/ENSG00000138411/ENSG00000134057/ENSG00000153107/ENSG00000169679/ENSG00000094804/ENSG00000119408/ENSG00000094880/ENSG00000112742/ENSG00000004897/ENSG00000036257/ENSG00000126787/ENSG00000134982/ENSG00000040275/ENSG00000071539…
GO:0031016	GO:0031016	pancreas development	73	0.405872	1.83688	0.000127202	0.00542235	0.00451824	5700	tags=32%, list=14%, signal=27%	ENSG00000125798/ENSG00000164690/ENSG00000173404/ENSG00000139515/ENSG00000162992/ENSG00000125820/ENSG00000119547/ENSG00000169856/ENSG00000135100/ENSG00000130675/ENSG00000172071/ENSG00000007372/ENSG00000105976/ENSG00000134852/ENSG00000170558/ENSG00000100883/ENSG00000102854/ENSG00000082701/ENSG00000153162/ENSG00000125378/ENSG00000106615/ENSG00000140992/ENSG00000198843
GO:0006490	GO:0006490	oligosaccharide-lipid intermediate biosynthetic process	19	0.664713	2.19078	0.000128323	0.00542804	0.00452298	10378	tags=74%, list=26%, signal=54%	ENSG00000128039/ENSG00000172269/ENSG00000159063/ENSG00000153989/ENSG00000139133/ENSG00000119523/ENSG00000253710/ENSG00000086848/ENSG00000214160/ENSG00000175548/ENSG00000033011/ENSG00000172339/ENSG00000167130/ENSG00000117682
GO:1903649	GO:1903649	regulation of cytoplasmic transport	28	0.575579	2.1149	0.00013753	0.0057731	0.0048105	11842	tags=79%, list=30%, signal=55%	ENSG00000137710/ENSG00000169032/ENSG00000185345/ENSG00000087053/ENSG00000115561/ENSG00000164144/ENSG00000138246/ENSG00000100030/ENSG00000080371/ENSG00000054793/ENSG00000078018/ENSG00000153071/ENSG00000187555/ENSG00000112335/ENSG00000117280/ENSG00000119979/ENSG00000137642/ENSG00000163462/ENSG00000092820/ENSG00000160695/ENSG00000188906/ENSG00000147164
GO:0006493	GO:0006493	protein O-linked glycosylation	86	0.38317	1.75686	0.00014505	0.00604264	0.0050351	7730	tags=38%, list=20%, signal=31%	ENSG00000140297/ENSG00000179913/ENSG00000119514/ENSG00000115339/ENSG00000109586/ENSG00000170340/ENSG00000144278/ENSG00000013375/ENSG00000185900/ENSG00000139324/ENSG00000110080/ENSG00000008513/ENSG00000176597/ENSG00000214960/ENSG00000073849/ENSG00000178202/ENSG00000187605/ENSG00000176383/ENSG00000156966/ENSG00000158089/ENSG00000171155/ENSG00000162885/ENSG00000164574/ENSG00000141429/ENSG00000000419…
GO:0019748	GO:0019748	secondary metabolic process	59	0.43108	1.891	0.000148094	0.00612306	0.00510211	3676	tags=25%, list=9%, signal=23%	ENSG00000180176/ENSG00000132437/ENSG00000023839/ENSG00000198074/ENSG00000255974/ENSG00000105852/ENSG00000107165/ENSG00000010932/ENSG00000054277/ENSG00000203668/ENSG00000151632/ENSG00000197838/ENSG00000104044/ENSG00000120805/ENSG00000151012
GO:0006890	GO:0006890	retrograde vesicle-mediated transport, Golgi to endoplasmic reticulum	52	0.444062	1.90716	0.000154647	0.00626872	0.00522348	11187	tags=62%, list=28%, signal=44%	ENSG00000154917/ENSG00000095139/ENSG00000087502/ENSG00000135249/ENSG00000198382/ENSG00000113384/ENSG00000100196/ENSG00000184432/ENSG00000113719/ENSG00000136240/ENSG00000168374/ENSG00000122218/ENSG00000175582/ENSG00000180957/ENSG00000054793/ENSG00000092108/ENSG00000111481/ENSG00000103051/ENSG00000136152/ENSG00000170348/ENSG00000134287/ENSG00000265808/ENSG00000233087/ENSG00000105438/ENSG00000172007…
GO:1904872	GO:1904872	regulation of telomerase RNA localization to Cajal body	18	0.674148	2.19522	0.000156753	0.00626872	0.00522348	11415	tags=89%, list=29%, signal=63%	ENSG00000120438/ENSG00000150753/ENSG00000156261/ENSG00000115484/ENSG00000166226/ENSG00000146731/ENSG00000145414/ENSG00000163468/ENSG00000130826/ENSG00000182117/ENSG00000175792/ENSG00000135624/ENSG00000145912/ENSG00000172795/ENSG00000140694/ENSG00000144736
GO:0006999	GO:0006999	nuclear pore organization	14	0.739796	2.15777	0.000157023	0.00626872	0.00522348	10316	tags=100%, list=26%, signal=74%	ENSG00000153207/ENSG00000155561/ENSG00000069248/ENSG00000115310/ENSG00000124789/ENSG00000058804/ENSG00000085415/ENSG00000102900/ENSG00000138750/ENSG00000110713/ENSG00000163002/ENSG00000047410/ENSG00000111581/ENSG00000166822
GO:0098659	GO:0098659	inorganic cation import across plasma membrane	103	0.355169	1.73123	0.000159711	0.00626872	0.00522348	5026	tags=28%, list=13%, signal=25%	ENSG00000260458/ENSG00000115616/ENSG00000165125/ENSG00000196517/ENSG00000169427/ENSG00000074803/ENSG00000168135/ENSG00000138622/ENSG00000118160/ENSG00000055118/ENSG00000159197/ENSG00000100170/ENSG00000105409/ENSG00000131183/ENSG00000130054/ENSG00000186009/ENSG00000136868/ENSG00000207713/ENSG00000127412/ENSG00000163399/ENSG00000148346/ENSG00000010704/ENSG00000221955/ENSG00000064651/ENSG00000070915…
GO:0099587	GO:0099587	inorganic ion import across plasma membrane	103	0.355169	1.73123	0.000159711	0.00626872	0.00522348	5026	tags=28%, list=13%, signal=25%	ENSG00000260458/ENSG00000115616/ENSG00000165125/ENSG00000196517/ENSG00000169427/ENSG00000074803/ENSG00000168135/ENSG00000138622/ENSG00000118160/ENSG00000055118/ENSG00000159197/ENSG00000100170/ENSG00000105409/ENSG00000131183/ENSG00000130054/ENSG00000186009/ENSG00000136868/ENSG00000207713/ENSG00000127412/ENSG00000163399/ENSG00000148346/ENSG00000010704/ENSG00000221955/ENSG00000064651/ENSG00000070915…
GO:0045665	GO:0045665	negative regulation of neuron differentiation	66	0.423728	1.85841	0.000160019	0.00626872	0.00522348	5865	tags=39%, list=15%, signal=34%	ENSG00000205927/ENSG00000164690/ENSG00000154342/ENSG00000164438/ENSG00000144355/ENSG00000125820/ENSG00000139352/ENSG00000159556/ENSG00000148400/ENSG00000125686/ENSG00000242689/ENSG00000138083/ENSG00000066279/ENSG00000076864/ENSG00000150764/ENSG00000007372/ENSG00000151247/ENSG00000082701/ENSG00000142192/ENSG00000008294/ENSG00000101752/ENSG00000175324/ENSG00000185630/ENSG00000178764/ENSG00000110367…
GO:0070849	GO:0070849	response to epidermal growth factor	49	0.473334	2.0112	0.000160243	0.00626872	0.00522348	8313	tags=43%, list=21%, signal=34%	ENSG00000141736/ENSG00000139352/ENSG00000127831/ENSG00000125686/ENSG00000179295/ENSG00000169895/ENSG00000166986/ENSG00000140575/ENSG00000128944/ENSG00000140992/ENSG00000100030/ENSG00000146648/ENSG00000109917/ENSG00000141441/ENSG00000073417/ENSG00000136848/ENSG00000110395/ENSG00000108861/ENSG00000156735/ENSG00000129515/ENSG00000127947
GO:0006271	GO:0006271	DNA strand elongation involved in DNA replication	15	0.742394	2.24718	0.000160736	0.00626872	0.00522348	8893	tags=73%, list=22%, signal=57%	ENSG00000104738/ENSG00000133119/ENSG00000077514/ENSG00000101003/ENSG00000132646/ENSG00000163918/ENSG00000138346/ENSG00000101868/ENSG00000005156/ENSG00000148229/ENSG00000112118
GO:0008344	GO:0008344	adult locomotory behavior	71	0.411936	1.8178	0.000165425	0.00640616	0.00533801	4178	tags=27%, list=11%, signal=24%	ENSG00000125798/ENSG00000150361/ENSG00000168621/ENSG00000116329/ENSG00000101188/ENSG00000063015/ENSG00000114279/ENSG00000163064/ENSG00000197587/ENSG00000164830/ENSG00000095139/ENSG00000084073/ENSG00000131238/ENSG00000105464/ENSG00000154277/ENSG00000185345/ENSG00000120068/ENSG00000151491/ENSG00000141458
GO:0030098	GO:0030098	lymphocyte differentiation	359	-0.421265	-1.3603	0.000168912	0.00649542	0.00541239	10727	tags=33%, list=27%, signal=25%	ENSG00000118046/ENSG00000010610/ENSG00000110492/ENSG00000163874/ENSG00000123338/ENSG00000134545/ENSG00000121807/ENSG00000136244/ENSG00000175467/ENSG00000196839/ENSG00000169508/ENSG00000204287/ENSG00000123999/ENSG00000049768/ENSG00000167604/ENSG00000008438/ENSG00000158473/ENSG00000134242/ENSG00000276231/ENSG00000120899/ENSG00000020633/ENSG00000152495/ENSG00000156127/ENSG00000138795/ENSG00000066336…
GO:0021696	GO:0021696	cerebellar cortex morphogenesis	33	0.541914	2.08342	0.000172333	0.00658095	0.00548365	5587	tags=39%, list=14%, signal=34%	ENSG00000089116/ENSG00000171798/ENSG00000273706/ENSG00000135472/ENSG00000102924/ENSG00000118193/ENSG00000169032/ENSG00000179295/ENSG00000138311/ENSG00000152208/ENSG00000177628/ENSG00000135049/ENSG00000105887
GO:0006891	GO:0006891	intra-Golgi vesicle-mediated transport	33	0.541296	2.08105	0.00017776	0.0067414	0.00561735	10207	tags=73%, list=26%, signal=54%	ENSG00000154917/ENSG00000073969/ENSG00000184432/ENSG00000181789/ENSG00000122218/ENSG00000175582/ENSG00000133103/ENSG00000135775/ENSG00000160218/ENSG00000164597/ENSG00000134265/ENSG00000129083/ENSG00000066455/ENSG00000111481/ENSG00000136152/ENSG00000034713/ENSG00000108433/ENSG00000233087/ENSG00000172007/ENSG00000213380/ENSG00000105402/ENSG00000151532/ENSG00000108587/ENSG00000100568
GO:0009064	GO:0009064	glutamine family amino acid metabolic process	78	0.374095	1.67463	0.000180117	0.00674584	0.00562105	5292	tags=31%, list=13%, signal=27%	ENSG00000128683/ENSG00000136750/ENSG00000100033/ENSG00000177181/ENSG00000255151/ENSG00000166840/ENSG00000198380/ENSG00000162174/ENSG00000198650/ENSG00000130707/ENSG00000128059/ENSG00000103876/ENSG00000159423/ENSG00000001084/ENSG00000120053/ENSG00000023909/ENSG00000065154/ENSG00000151012/ENSG00000163655/ENSG00000059573/ENSG00000058668/ENSG00000125166/ENSG00000171793/ENSG00000182890
GO:0050432	GO:0050432	catecholamine secretion	57	0.424053	1.85428	0.000180331	0.00674584	0.00562105	1754	tags=19%, list=4%, signal=18%	ENSG00000101204/ENSG00000132872/ENSG00000168621/ENSG00000160716/ENSG00000100604/ENSG00000213023/ENSG00000129990/ENSG00000121853/ENSG00000082556/ENSG00000019505/ENSG00000101180
GO:0036498	GO:0036498	IRE1-mediated unfolded protein response	19	0.654474	2.15704	0.000182347	0.00677517	0.00564549	8389	tags=74%, list=21%, signal=58%	ENSG00000134398/ENSG00000198855/ENSG00000128590/ENSG00000109133/ENSG00000014123/ENSG00000044574/ENSG00000124164/ENSG00000106541/ENSG00000136848/ENSG00000178607/ENSG00000196396/ENSG00000121022/ENSG00000138617/ENSG00000153094
GO:0044743	GO:0044743	protein transmembrane import into intracellular organelle	36	0.518159	2.02497	0.000187766	0.0069297	0.00577425	6745	tags=53%, list=17%, signal=44%	ENSG00000114757/ENSG00000154174/ENSG00000144381/ENSG00000102910/ENSG00000163528/ENSG00000134375/ENSG00000162928/ENSG00000164284/ENSG00000127980/ENSG00000164751/ENSG00000112357/ENSG00000173726/ENSG00000120675/ENSG00000156709/ENSG00000158882/ENSG00000109519/ENSG00000105197/ENSG00000204152/ENSG00000265354
GO:0006047	GO:0006047	UDP-N-acetylglucosamine metabolic process	14	0.735249	2.14451	0.000194477	0.00712954	0.00594077	6541	tags=57%, list=17%, signal=48%	ENSG00000167080/ENSG00000100522/ENSG00000198380/ENSG00000172269/ENSG00000013375/ENSG00000117143/ENSG00000117620/ENSG00000159921
GO:1990573	GO:1990573	potassium ion import across plasma membrane	48	0.449433	1.89449	0.000199944	0.0072814	0.00606731	5551	tags=35%, list=14%, signal=30%	ENSG00000260458/ENSG00000169427/ENSG00000074803/ENSG00000168135/ENSG00000138622/ENSG00000055118/ENSG00000159197/ENSG00000105409/ENSG00000186009/ENSG00000163399/ENSG00000221955/ENSG00000064651/ENSG00000070915/ENSG00000075711/ENSG00000143153/ENSG00000099822/ENSG00000132681
GO:0006505	GO:0006505	GPI anchor metabolic process	31	0.525906	2.01058	0.000206442	0.00745251	0.00620989	7774	tags=48%, list=20%, signal=39%	ENSG00000109182/ENSG00000161395/ENSG00000277161/ENSG00000165282/ENSG00000163964/ENSG00000197858/ENSG00000143315/ENSG00000197121/ENSG00000087111/ENSG00000000419/ENSG00000197563/ENSG00000165195/ENSG00000151665/ENSG00000142892/ENSG00000069943
GO:2000811	GO:2000811	negative regulation of anoikis	17	0.694396	2.19889	0.000207906	0.00745251	0.00620989	4426	tags=41%, list=11%, signal=37%	ENSG00000086548/ENSG00000105388/ENSG00000148400/ENSG00000169398/ENSG00000150093/ENSG00000196781/ENSG00000141378
GO:0006367	GO:0006367	transcription initiation from RNA polymerase II promoter	74	0.388027	1.69279	0.000208708	0.00745251	0.00620989	9766	tags=46%, list=25%, signal=35%	ENSG00000109819/ENSG00000064313/ENSG00000135100/ENSG00000125686/ENSG00000007968/ENSG00000111530/ENSG00000180182/ENSG00000165417/ENSG00000164758/ENSG00000126351/ENSG00000225830/ENSG00000153767/ENSG00000197780/ENSG00000272047/ENSG00000134058/ENSG00000144231/ENSG00000140307/ENSG00000174953/ENSG00000135446/ENSG00000112242/ENSG00000112282/ENSG00000178913/ENSG00000008838/ENSG00000170836/ENSG00000178585…
GO:0031440	GO:0031440	regulation of mRNA 3'-end processing	28	0.562915	2.06837	0.000211325	0.00749725	0.00624717	11264	tags=57%, list=28%, signal=41%	ENSG00000164944/ENSG00000136937/ENSG00000167005/ENSG00000134371/ENSG00000166477/ENSG00000134057/ENSG00000107864/ENSG00000129315/ENSG00000155827/ENSG00000174953/ENSG00000090060/ENSG00000214575/ENSG00000114503/ENSG00000185122/ENSG00000111605/ENSG00000100722
GO:0007064	GO:0007064	mitotic sister chromatid cohesion	28	0.562811	2.06799	0.000213561	0.00752802	0.00627281	8293	tags=64%, list=21%, signal=51%	ENSG00000164754/ENSG00000077935/ENSG00000136982/ENSG00000129810/ENSG00000156831/ENSG00000121579/ENSG00000072501/ENSG00000198887/ENSG00000177602/ENSG00000244588/ENSG00000083642/ENSG00000133302/ENSG00000139687/ENSG00000121892/ENSG00000146670/ENSG00000164190/ENSG00000108055/ENSG00000113648
GO:0006909	GO:0006909	phagocytosis	292	-0.429155	-1.3785	0.000230127	0.00806032	0.00671635	7577	tags=28%, list=19%, signal=23%	ENSG00000110934/ENSG00000128271/ENSG00000197561/ENSG00000181790/ENSG00000168421/ENSG00000105352/ENSG00000081237/ENSG00000085265/ENSG00000103490/ENSG00000223648/ENSG00000211957/ENSG00000005844/ENSG00000163219/ENSG00000261832/ENSG00000051523/ENSG00000276775/ENSG00000211892/ENSG00000123838/ENSG00000163485/ENSG00000100365/ENSG00000211964/ENSG00000211955/ENSG00000172232/ENSG00000100092/ENSG00000166428…
GO:1903830	GO:1903830	magnesium ion transmembrane transport	17	0.690648	2.18703	0.000233299	0.0081197	0.00676583	6444	tags=53%, list=16%, signal=44%	ENSG00000163293/ENSG00000104361/ENSG00000136052/ENSG00000169446/ENSG00000140157/ENSG00000102158/ENSG00000124532/ENSG00000001461/ENSG00000170113
GO:0016266	GO:0016266	O-glycan processing	43	0.478236	1.96543	0.000237934	0.00819428	0.00682798	9183	tags=56%, list=23%, signal=43%	ENSG00000140297/ENSG00000179913/ENSG00000119514/ENSG00000115339/ENSG00000109586/ENSG00000170340/ENSG00000144278/ENSG00000110080/ENSG00000008513/ENSG00000176597/ENSG00000073849/ENSG00000176383/ENSG00000156966/ENSG00000158089/ENSG00000171155/ENSG00000164574/ENSG00000141429/ENSG00000158470/ENSG00000136840/ENSG00000151233/ENSG00000118017/ENSG00000187210/ENSG00000143641/ENSG00000101346
GO:0090114	GO:0090114	COPII-coated vesicle budding	29	0.558257	2.07956	0.000238422	0.00819428	0.00682798	9562	tags=72%, list=24%, signal=55%	ENSG00000113615/ENSG00000101310/ENSG00000086598/ENSG00000152700/ENSG00000176986/ENSG00000150961/ENSG00000138069/ENSG00000154305/ENSG00000036257/ENSG00000138674/ENSG00000124164/ENSG00000138802/ENSG00000114354/ENSG00000101558/ENSG00000170348/ENSG00000117153/ENSG00000119414/ENSG00000100934/ENSG00000079332/ENSG00000125875/ENSG00000157020
GO:0006607	GO:0006607	NLS-bearing protein import into nucleus	20	0.629537	2.11253	0.000241029	0.00823241	0.00685975	9257	tags=70%, list=23%, signal=54%	ENSG00000185467/ENSG00000102753/ENSG00000196862/ENSG00000182481/ENSG00000114030/ENSG00000187627/ENSG00000025800/ENSG00000153201/ENSG00000186432/ENSG00000065150/ENSG00000138750/ENSG00000163002/ENSG00000108424/ENSG00000185304
GO:0032354	GO:0032354	response to follicle-stimulating hormone	14	0.728381	2.12448	0.000249218	0.00841566	0.00701245	5645	tags=71%, list=14%, signal=61%	ENSG00000109819/ENSG00000121853/ENSG00000112972/ENSG00000145545/ENSG00000069702/ENSG00000148400/ENSG00000001084/ENSG00000023909/ENSG00000122641/ENSG00000070886
GO:0031018	GO:0031018	endocrine pancreas development	44	0.474574	1.95871	0.000249455	0.00841566	0.00701245	5644	tags=39%, list=14%, signal=33%	ENSG00000125798/ENSG00000173404/ENSG00000139515/ENSG00000162992/ENSG00000125820/ENSG00000119547/ENSG00000169856/ENSG00000130675/ENSG00000172071/ENSG00000007372/ENSG00000134852/ENSG00000170558/ENSG00000082701/ENSG00000153162/ENSG00000125378/ENSG00000106615/ENSG00000140992
GO:0006488	GO:0006488	dolichol-linked oligosaccharide biosynthetic process	18	0.660603	2.15112	0.000259183	0.00863797	0.00719769	10378	tags=72%, list=26%, signal=53%	ENSG00000128039/ENSG00000172269/ENSG00000159063/ENSG00000153989/ENSG00000139133/ENSG00000119523/ENSG00000086848/ENSG00000214160/ENSG00000175548/ENSG00000033011/ENSG00000172339/ENSG00000167130/ENSG00000117682
GO:0006739	GO:0006739	NADP metabolic process	35	0.513922	1.96854	0.000260404	0.00863797	0.00719769	7667	tags=49%, list=19%, signal=39%	ENSG00000131781/ENSG00000065833/ENSG00000010932/ENSG00000160211/ENSG00000182054/ENSG00000138413/ENSG00000181019/ENSG00000152620/ENSG00000078237/ENSG00000112992/ENSG00000197713/ENSG00000171314/ENSG00000112874/ENSG00000023697/ENSG00000082212/ENSG00000235376/ENSG00000163931
GO:0046164	GO:0046164	alcohol catabolic process	52	0.433623	1.86233	0.000260757	0.00863797	0.00719769	5456	tags=38%, list=14%, signal=33%	ENSG00000170835/ENSG00000198074/ENSG00000109193/ENSG00000101188/ENSG00000104331/ENSG00000140263/ENSG00000122787/ENSG00000128039/ENSG00000197165/ENSG00000122126/ENSG00000132746/ENSG00000133731/ENSG00000141401/ENSG00000159082/ENSG00000115159/ENSG00000173597/ENSG00000087053/ENSG00000078269/ENSG00000162813/ENSG00000068383
GO:0070192	GO:0070192	chromosome organization involved in meiotic cell cycle	66	0.412757	1.81029	0.000269465	0.00887219	0.00739285	6092	tags=41%, list=15%, signal=35%	ENSG00000133863/ENSG00000167014/ENSG00000175305/ENSG00000164754/ENSG00000168070/ENSG00000176635/ENSG00000129810/ENSG00000151503/ENSG00000136824/ENSG00000143194/ENSG00000051180/ENSG00000156970/ENSG00000113810/ENSG00000120498/ENSG00000161609/ENSG00000144554/ENSG00000020922/ENSG00000169679/ENSG00000143452/ENSG00000147601/ENSG00000269964/ENSG00000196074/ENSG00000058804/ENSG00000163535/ENSG00000119048…
GO:0006670	GO:0006670	sphingosine metabolic process	19	0.638398	2.10405	0.000271054	0.00887219	0.00739285	5514	tags=58%, list=14%, signal=50%	ENSG00000078124/ENSG00000188611/ENSG00000138744/ENSG00000100596/ENSG00000177076/ENSG00000177628/ENSG00000163082/ENSG00000204147/ENSG00000172296/ENSG00000090054/ENSG00000126821
GO:0050433	GO:0050433	regulation of catecholamine secretion	55	0.429373	1.85438	0.000281901	0.00917262	0.00764319	1754	tags=20%, list=4%, signal=19%	ENSG00000101204/ENSG00000132872/ENSG00000168621/ENSG00000160716/ENSG00000100604/ENSG00000213023/ENSG00000129990/ENSG00000121853/ENSG00000082556/ENSG00000019505/ENSG00000101180
GO:0007339	GO:0007339	binding of sperm to zona pellucida	38	0.486234	1.94356	0.00029005	0.00933674	0.00777995	5470	tags=42%, list=14%, signal=36%	ENSG00000103310/ENSG00000122133/ENSG00000168619/ENSG00000104755/ENSG00000124812/ENSG00000197140/ENSG00000160886/ENSG00000120438/ENSG00000150753/ENSG00000165637/ENSG00000156261/ENSG00000064199/ENSG00000186452/ENSG00000115484/ENSG00000166226/ENSG00000090512
GO:1905818	GO:1905818	regulation of chromosome separation	70	0.392445	1.75387	0.000291679	0.00933674	0.00777995	9532	tags=54%, list=24%, signal=41%	ENSG00000164754/ENSG00000121101/ENSG00000156831/ENSG00000086827/ENSG00000174442/ENSG00000164109/ENSG00000058729/ENSG00000138778/ENSG00000156970/ENSG00000112029/ENSG00000117724/ENSG00000138411/ENSG00000134057/ENSG00000153107/ENSG00000169679/ENSG00000094804/ENSG00000119408/ENSG00000094880/ENSG00000112742/ENSG00000004897/ENSG00000036257/ENSG00000126787/ENSG00000134982/ENSG00000040275/ENSG00000071539…
GO:0090140	GO:0090140	regulation of mitochondrial fission	32	0.538885	2.05913	0.000292039	0.00933674	0.00777995	10628	tags=69%, list=27%, signal=50%	ENSG00000109819/ENSG00000166575/ENSG00000176171/ENSG00000153310/ENSG00000069329/ENSG00000185345/ENSG00000087470/ENSG00000100335/ENSG00000134278/ENSG00000198060/ENSG00000247077/ENSG00000006451/ENSG00000087586/ENSG00000166323/ENSG00000017797/ENSG00000156026/ENSG00000128052/ENSG00000102967/ENSG00000168958/ENSG00000278259/ENSG00000011465/ENSG00000090432
GO:0006090	GO:0006090	pyruvate metabolic process	102	0.340381	1.65689	0.000297934	0.00947017	0.00789112	7434	tags=36%, list=19%, signal=30%	ENSG00000115592/ENSG00000170950/ENSG00000172482/ENSG00000109819/ENSG00000065833/ENSG00000150768/ENSG00000166796/ENSG00000067057/ENSG00000100644/ENSG00000102144/ENSG00000181192/ENSG00000213585/ENSG00000109107/ENSG00000132356/ENSG00000091140/ENSG00000078237/ENSG00000105220/ENSG00000135094/ENSG00000171314/ENSG00000111640/ENSG00000142192/ENSG00000067225/ENSG00000134333/ENSG00000181929/ENSG00000158122…
GO:0015824	GO:0015824	proline transport	10	0.805356	2.13795	0.000303471	0.00954801	0.00795599	1602	tags=40%, list=4%, signal=38%	ENSG00000072041/ENSG00000197106/ENSG00000180773/ENSG00000186335
GO:0010965	GO:0010965	regulation of mitotic sister chromatid separation	64	0.402043	1.77621	0.000303855	0.00954801	0.00795599	9532	tags=56%, list=24%, signal=43%	ENSG00000164754/ENSG00000121101/ENSG00000156831/ENSG00000086827/ENSG00000174442/ENSG00000164109/ENSG00000058729/ENSG00000138778/ENSG00000156970/ENSG00000112029/ENSG00000117724/ENSG00000138411/ENSG00000134057/ENSG00000153107/ENSG00000169679/ENSG00000094804/ENSG00000119408/ENSG00000094880/ENSG00000112742/ENSG00000004897/ENSG00000036257/ENSG00000126787/ENSG00000134982/ENSG00000040275/ENSG00000071539…
GO:0015844	GO:0015844	monoamine transport	83	0.365933	1.66953	0.000306489	0.00957605	0.00797935	1754	tags=16%, list=4%, signal=15%	ENSG00000101204/ENSG00000142319/ENSG00000132872/ENSG00000168621/ENSG00000160716/ENSG00000100604/ENSG00000213023/ENSG00000129990/ENSG00000169213/ENSG00000121853/ENSG00000082556/ENSG00000019505/ENSG00000101180
GO:0044331	GO:0044331	cell-cell adhesion mediated by cadherin	28	0.551759	2.02738	0.000316868	0.00984439	0.00820295	5481	tags=50%, list=14%, signal=43%	ENSG00000125798/ENSG00000154342/ENSG00000050030/ENSG00000148400/ENSG00000060656/ENSG00000122194/ENSG00000125966/ENSG00000119888/ENSG00000074276/ENSG00000170558/ENSG00000104067/ENSG00000112715/ENSG00000130396/ENSG00000153162
GO:0006805	GO:0006805	xenobiotic metabolic process	101	0.346637	1.68784	0.000320999	0.00991672	0.00826322	2986	tags=20%, list=8%, signal=18%	ENSG00000135226/ENSG00000213759/ENSG00000023839/ENSG00000244067/ENSG00000255974/ENSG00000174156/ENSG00000131781/ENSG00000172828/ENSG00000167165/ENSG00000105852/ENSG00000151726/ENSG00000197408/ENSG00000010932/ENSG00000164237/ENSG00000134716/ENSG00000197165/ENSG00000197838/ENSG00000143819/ENSG00000144959/ENSG00000181019
GO:0008652	GO:0008652	cellular amino acid biosynthetic process	74	0.38108	1.66248	0.000329751	0.0100763	0.00839623	6260	tags=34%, list=16%, signal=28%	ENSG00000172482/ENSG00000128683/ENSG00000130707/ENSG00000164300/ENSG00000160200/ENSG00000179918/ENSG00000135069/ENSG00000149313/ENSG00000182199/ENSG00000120053/ENSG00000065154/ENSG00000124275/ENSG00000059573/ENSG00000228716/ENSG00000058668/ENSG00000152952/ENSG00000125166/ENSG00000060982/ENSG00000135094/ENSG00000182890/ENSG00000132824/ENSG00000146733/ENSG00000116761/ENSG00000099810/ENSG00000148672
GO:0042100	GO:0042100	B cell proliferation	85	-0.522849	-1.594	0.000329831	0.0100763	0.00839623	7416	tags=36%, list=19%, signal=30%	ENSG00000019582/ENSG00000010671/ENSG00000134061/ENSG00000240972/ENSG00000175857/ENSG00000081237/ENSG00000125726/ENSG00000101017/ENSG00000168685/ENSG00000004468/ENSG00000168918/ENSG00000163599/ENSG00000122122/ENSG00000184995/ENSG00000113520/ENSG00000186827/ENSG00000170476/ENSG00000109471/ENSG00000169194/ENSG00000198286/ENSG00000102245/ENSG00000138684/ENSG00000012124/ENSG00000160856/ENSG00000159958…
GO:1903037	GO:1903037	regulation of leukocyte cell-cell adhesion	320	-0.421994	-1.35951	0.000334935	0.0101757	0.00847904	10523	tags=38%, list=27%, signal=28%	ENSG00000110492/ENSG00000206503/ENSG00000163874/ENSG00000123338/ENSG00000121807/ENSG00000136244/ENSG00000175467/ENSG00000196839/ENSG00000010810/ENSG00000147437/ENSG00000012779/ENSG00000204287/ENSG00000090776/ENSG00000049768/ENSG00000167604/ENSG00000158473/ENSG00000117281/ENSG00000242574/ENSG00000160255/ENSG00000196735/ENSG00000134242/ENSG00000276231/ENSG00000020633/ENSG00000108947/ENSG00000007908…
GO:0018195	GO:0018195	peptidyl-arginine modification	25	0.588922	2.05554	0.000339943	0.0102711	0.00855853	1775	tags=16%, list=4%, signal=15%	ENSG00000142619/ENSG00000142623/ENSG00000156219/ENSG00000117115
GO:0006506	GO:0006506	GPI anchor biosynthetic process	30	0.543963	2.0662	0.000359471	0.0108018	0.00900073	7774	tags=50%, list=20%, signal=40%	ENSG00000109182/ENSG00000161395/ENSG00000277161/ENSG00000165282/ENSG00000163964/ENSG00000197858/ENSG00000143315/ENSG00000197121/ENSG00000087111/ENSG00000000419/ENSG00000197563/ENSG00000165195/ENSG00000151665/ENSG00000142892/ENSG00000069943
GO:0008299	GO:0008299	isoprenoid biosynthetic process	28	0.547139	2.0104	0.000361813	0.0108131	0.00901014	5818	tags=54%, list=15%, signal=46%	ENSG00000148377/ENSG00000067064/ENSG00000184254/ENSG00000112972/ENSG00000121039/ENSG00000128039/ENSG00000113161/ENSG00000164494/ENSG00000153989/ENSG00000160752/ENSG00000214960/ENSG00000148459/ENSG00000173085/ENSG00000160285/ENSG00000110921
GO:0034501	GO:0034501	protein localization to kinetochore	19	0.625316	2.06094	0.000379701	0.0111449	0.0092866	6062	tags=53%, list=15%, signal=45%	ENSG00000172167/ENSG00000137812/ENSG00000086827/ENSG00000174442/ENSG00000198824/ENSG00000031691/ENSG00000112742/ENSG00000170312/ENSG00000177602/ENSG00000040275
GO:1903083	GO:1903083	protein localization to condensed chromosome	19	0.625316	2.06094	0.000379701	0.0111449	0.0092866	6062	tags=53%, list=15%, signal=45%	ENSG00000172167/ENSG00000137812/ENSG00000086827/ENSG00000174442/ENSG00000198824/ENSG00000031691/ENSG00000112742/ENSG00000170312/ENSG00000177602/ENSG00000040275
GO:0042416	GO:0042416	dopamine biosynthetic process	11	0.773895	2.11808	0.00038215	0.0111449	0.0092866	160	tags=27%, list=0%, signal=27%	ENSG00000180176/ENSG00000142319/ENSG00000132437
GO:0060688	GO:0060688	regulation of morphogenesis of a branching structure	50	0.421727	1.7821	0.000385918	0.0111449	0.0092866	8195	tags=38%, list=21%, signal=30%	ENSG00000273706/ENSG00000168621/ENSG00000164690/ENSG00000128714/ENSG00000137573/ENSG00000166923/ENSG00000115310/ENSG00000260027/ENSG00000112715/ENSG00000169083/ENSG00000125378/ENSG00000170577/ENSG00000179222/ENSG00000205213/ENSG00000126778/ENSG00000066468/ENSG00000135744/ENSG00000105989/ENSG00000091831
GO:0047496	GO:0047496	vesicle transport along microtubule	48	0.433485	1.82727	0.000386295	0.0111449	0.0092866	8782	tags=52%, list=22%, signal=41%	ENSG00000158560/ENSG00000155980/ENSG00000103723/ENSG00000170759/ENSG00000124333/ENSG00000177879/ENSG00000138069/ENSG00000132842/ENSG00000072803/ENSG00000070718/ENSG00000075945/ENSG00000131437/ENSG00000185009/ENSG00000101350/ENSG00000078018/ENSG00000007168/ENSG00000173805/ENSG00000157823/ENSG00000147642/ENSG00000196072/ENSG00000137177/ENSG00000165714/ENSG00000104164/ENSG00000197102/ENSG00000163820
GO:0009953	GO:0009953	dorsal/ventral pattern formation	81	0.372011	1.69273	0.000387102	0.0111449	0.0092866	2950	tags=19%, list=7%, signal=17%	ENSG00000273706/ENSG00000164690/ENSG00000154342/ENSG00000164651/ENSG00000214513/ENSG00000125820/ENSG00000139352/ENSG00000163064/ENSG00000106689/ENSG00000168772/ENSG00000166923/ENSG00000164532/ENSG00000173917/ENSG00000138083/ENSG00000005073
GO:0099518	GO:0099518	vesicle cytoskeletal trafficking	72	0.380789	1.67113	0.000387102	0.0111449	0.0092866	8355	tags=49%, list=21%, signal=38%	ENSG00000132872/ENSG00000158560/ENSG00000155980/ENSG00000139220/ENSG00000103723/ENSG00000176658/ENSG00000170759/ENSG00000165813/ENSG00000124333/ENSG00000177879/ENSG00000167306/ENSG00000138069/ENSG00000157483/ENSG00000132842/ENSG00000072803/ENSG00000070718/ENSG00000106299/ENSG00000075945/ENSG00000131437/ENSG00000185009/ENSG00000128833/ENSG00000101350/ENSG00000078018/ENSG00000007168/ENSG00000173805…
GO:2000736	GO:2000736	regulation of stem cell differentiation	56	0.420286	1.80965	0.000390825	0.0111935	0.0093271	8129	tags=43%, list=21%, signal=34%	ENSG00000168621/ENSG00000154342/ENSG00000088836/ENSG00000148400/ENSG00000167258/ENSG00000253729/ENSG00000113013/ENSG00000136574/ENSG00000167005/ENSG00000037474/ENSG00000137693/ENSG00000110693/ENSG00000091127/ENSG00000119715/ENSG00000092969/ENSG00000141448/ENSG00000078747/ENSG00000121236/ENSG00000136045/ENSG00000084093/ENSG00000055332/ENSG00000174953/ENSG00000109180/ENSG00000198492
GO:1904036	GO:1904036	negative regulation of epithelial cell apoptotic process	47	0.448099	1.8654	0.000394059	0.0112276	0.00935555	1018	tags=13%, list=3%, signal=12%	ENSG00000171557/ENSG00000171564/ENSG00000105550/ENSG00000139515/ENSG00000162992/ENSG00000207582
GO:0030217	GO:0030217	T cell differentiation	253	-0.432721	-1.38566	0.00039913	0.0113085	0.00942291	10727	tags=36%, list=27%, signal=26%	ENSG00000118046/ENSG00000010610/ENSG00000110492/ENSG00000163874/ENSG00000123338/ENSG00000134545/ENSG00000121807/ENSG00000136244/ENSG00000175467/ENSG00000196839/ENSG00000169508/ENSG00000204287/ENSG00000049768/ENSG00000167604/ENSG00000158473/ENSG00000134242/ENSG00000276231/ENSG00000020633/ENSG00000152495/ENSG00000156127/ENSG00000138795/ENSG00000066336/ENSG00000074047/ENSG00000104856/ENSG00000196126…
GO:0035336	GO:0035336	long-chain fatty-acyl-CoA metabolic process	25	0.583749	2.03749	0.00040101	0.0113085	0.00942291	3453	tags=36%, list=9%, signal=33%	ENSG00000151726/ENSG00000064763/ENSG00000206527/ENSG00000118402/ENSG00000123983/ENSG00000164181/ENSG00000012660/ENSG00000149084/ENSG00000170522
GO:0021533	GO:0021533	cell differentiation in hindbrain	20	0.615414	2.06513	0.000414736	0.0116359	0.00969574	1915	tags=25%, list=5%, signal=24%	ENSG00000089116/ENSG00000171798/ENSG00000273706/ENSG00000135472/ENSG00000102924
GO:0030490	GO:0030490	maturation of SSU-rRNA	50	0.418296	1.7676	0.000423467	0.0118205	0.00984959	8784	tags=48%, list=22%, signal=37%	ENSG00000147679/ENSG00000164934/ENSG00000117597/ENSG00000275464/ENSG00000124787/ENSG00000058729/ENSG00000151304/ENSG00000119285/ENSG00000278053/ENSG00000120800/ENSG00000196943/ENSG00000130935/ENSG00000101782/ENSG00000141076/ENSG00000087269/ENSG00000167721/ENSG00000272047/ENSG00000108651/ENSG00000065183/ENSG00000181991/ENSG00000124541/ENSG00000115761/ENSG00000124784/ENSG00000165733
GO:0070327	GO:0070327	thyroid hormone transport	10	0.79846	2.11964	0.000425799	0.0118256	0.00985382	3782	tags=50%, list=10%, signal=45%	ENSG00000023839/ENSG00000103316/ENSG00000147100/ENSG00000134538/ENSG00000103257
GO:0033045	GO:0033045	regulation of sister chromatid segregation	70	0.384397	1.7179	0.000430946	0.0119084	0.00992281	9532	tags=53%, list=24%, signal=40%	ENSG00000164754/ENSG00000121101/ENSG00000156831/ENSG00000086827/ENSG00000174442/ENSG00000164109/ENSG00000058729/ENSG00000138778/ENSG00000156970/ENSG00000112029/ENSG00000117724/ENSG00000138411/ENSG00000134057/ENSG00000153107/ENSG00000169679/ENSG00000094804/ENSG00000119408/ENSG00000094880/ENSG00000112742/ENSG00000004897/ENSG00000036257/ENSG00000126787/ENSG00000134982/ENSG00000040275/ENSG00000071539…
GO:1901607	GO:1901607	alpha-amino acid biosynthetic process	66	0.404285	1.77314	0.000443756	0.0122011	0.0101667	10011	tags=52%, list=25%, signal=39%	ENSG00000172482/ENSG00000130707/ENSG00000164300/ENSG00000160200/ENSG00000179918/ENSG00000135069/ENSG00000149313/ENSG00000182199/ENSG00000120053/ENSG00000065154/ENSG00000124275/ENSG00000059573/ENSG00000228716/ENSG00000058668/ENSG00000152952/ENSG00000125166/ENSG00000135094/ENSG00000182890/ENSG00000132824/ENSG00000146733/ENSG00000116761/ENSG00000099810/ENSG00000148672/ENSG00000104524/ENSG00000100714…
GO:0043279	GO:0043279	response to alkaloid	113	0.328477	1.66529	0.0004642	0.0126997	0.0105822	4802	tags=23%, list=12%, signal=20%	ENSG00000180176/ENSG00000142319/ENSG00000132437/ENSG00000160716/ENSG00000139515/ENSG00000198626/ENSG00000109819/ENSG00000155897/ENSG00000082556/ENSG00000163064/ENSG00000081248/ENSG00000131771/ENSG00000131183/ENSG00000110090/ENSG00000144381/ENSG00000181019/ENSG00000145386/ENSG00000095209/ENSG00000132356/ENSG00000197299/ENSG00000051180/ENSG00000117152/ENSG00000088305/ENSG00000105220/ENSG00000125166…
GO:0015693	GO:0015693	magnesium ion transport	18	0.632729	2.06035	0.000514687	0.0140112	0.011675	6444	tags=50%, list=16%, signal=42%	ENSG00000163293/ENSG00000104361/ENSG00000136052/ENSG00000169446/ENSG00000140157/ENSG00000102158/ENSG00000124532/ENSG00000001461/ENSG00000170113
GO:0150172	GO:0150172	regulation of phosphatidylcholine metabolic process	10	0.791202	2.10037	0.000524834	0.0142171	0.0118465	7002	tags=80%, list=18%, signal=66%	ENSG00000168389/ENSG00000123983/ENSG00000121769/ENSG00000130164/ENSG00000162909/ENSG00000153395/ENSG00000123892/ENSG00000167972
GO:0007088	GO:0007088	regulation of mitotic nuclear division	109	0.322967	1.54754	0.000534585	0.0144102	0.0120075	6203	tags=34%, list=16%, signal=29%	ENSG00000182585/ENSG00000106031/ENSG00000137090/ENSG00000138798/ENSG00000164754/ENSG00000172167/ENSG00000121101/ENSG00000156831/ENSG00000086827/ENSG00000149554/ENSG00000117650/ENSG00000174442/ENSG00000174808/ENSG00000163235/ENSG00000164109/ENSG00000136122/ENSG00000156970/ENSG00000112029/ENSG00000078401/ENSG00000117724/ENSG00000138182/ENSG00000134057/ENSG00000148773/ENSG00000124882/ENSG00000169679…
GO:0035459	GO:0035459	vesicle cargo loading	27	0.539273	1.96498	0.000544141	0.0145963	0.0121625	9891	tags=78%, list=25%, signal=58%	ENSG00000113615/ENSG00000101310/ENSG00000086598/ENSG00000073921/ENSG00000176986/ENSG00000150961/ENSG00000138069/ENSG00000154305/ENSG00000150527/ENSG00000138674/ENSG00000138802/ENSG00000170348/ENSG00000236761/ENSG00000137177/ENSG00000212710/ENSG00000100934/ENSG00000244693/ENSG00000079332/ENSG00000125875/ENSG00000157020/ENSG00000271079
GO:0043090	GO:0043090	amino acid import	52	0.416499	1.78879	0.000549245	0.0146617	0.012217	4128	tags=25%, list=10%, signal=22%	ENSG00000132164/ENSG00000196517/ENSG00000101188/ENSG00000105143/ENSG00000152822/ENSG00000147100/ENSG00000139514/ENSG00000180773/ENSG00000105281/ENSG00000150093/ENSG00000151012/ENSG00000103257/ENSG00000117152
GO:0016579	GO:0016579	protein deubiquitination	117	0.32889	1.6637	0.000562229	0.0149357	0.0124454	8243	tags=40%, list=21%, signal=32%	ENSG00000134588/ENSG00000155100/ENSG00000273604/ENSG00000182199/ENSG00000121644/ENSG00000116750/ENSG00000120533/ENSG00000145390/ENSG00000180667/ENSG00000124486/ENSG00000154277/ENSG00000185345/ENSG00000128923/ENSG00000152484/ENSG00000170185/ENSG00000148481/ENSG00000124422/ENSG00000058056/ENSG00000138592/ENSG00000175073/ENSG00000115233/ENSG00000166348/ENSG00000185515/ENSG00000166192/ENSG00000048028…
GO:0046949	GO:0046949	fatty-acyl-CoA biosynthetic process	25	0.575563	2.00891	0.000568689	0.0150288	0.0125229	3453	tags=40%, list=9%, signal=37%	ENSG00000151726/ENSG00000206527/ENSG00000118402/ENSG00000123983/ENSG00000164181/ENSG00000012660/ENSG00000278540/ENSG00000131238/ENSG00000149084/ENSG00000170522
GO:0035338	GO:0035338	long-chain fatty-acyl-CoA biosynthetic process	19	0.615869	2.0298	0.000571199	0.0150288	0.0125229	3453	tags=42%, list=9%, signal=38%	ENSG00000151726/ENSG00000206527/ENSG00000118402/ENSG00000123983/ENSG00000164181/ENSG00000012660/ENSG00000149084/ENSG00000170522
GO:0071786	GO:0071786	endoplasmic reticulum tubular network organization	18	0.630065	2.05168	0.000577072	0.0150488	0.0125396	10335	tags=78%, list=26%, signal=58%	ENSG00000165476/ENSG00000118873/ENSG00000144320/ENSG00000109133/ENSG00000099246/ENSG00000184743/ENSG00000115310/ENSG00000133318/ENSG00000084733/ENSG00000115839/ENSG00000119787/ENSG00000170540/ENSG00000166822/ENSG00000068615
GO:0042733	GO:0042733	embryonic digit morphogenesis	56	0.411747	1.77289	0.000577432	0.0150488	0.0125396	5484	tags=27%, list=14%, signal=23%	ENSG00000164690/ENSG00000170178/ENSG00000128714/ENSG00000164930/ENSG00000104331/ENSG00000134323/ENSG00000148400/ENSG00000150893/ENSG00000005073/ENSG00000083307/ENSG00000144320/ENSG00000205084/ENSG00000162769/ENSG00000105983/ENSG00000125378
GO:0008088	GO:0008088	axo-dendritic transport	75	0.363028	1.57855	0.000583161	0.0151014	0.0125834	8558	tags=53%, list=22%, signal=42%	ENSG00000155980/ENSG00000109971/ENSG00000100644/ENSG00000103723/ENSG00000150672/ENSG00000198836/ENSG00000170759/ENSG00000154277/ENSG00000177879/ENSG00000132842/ENSG00000072803/ENSG00000102401/ENSG00000070718/ENSG00000054523/ENSG00000135049/ENSG00000142192/ENSG00000090889/ENSG00000131437/ENSG00000041353/ENSG00000185009/ENSG00000080371/ENSG00000134108/ENSG00000021574/ENSG00000101350/ENSG00000078018…
GO:0046148	GO:0046148	pigment biosynthetic process	62	0.407945	1.78948	0.000589367	0.0151014	0.0125834	8304	tags=47%, list=21%, signal=37%	ENSG00000196517/ENSG00000107165/ENSG00000054277/ENSG00000203668/ENSG00000128059/ENSG00000135776/ENSG00000159131/ENSG00000182199/ENSG00000136381/ENSG00000104044/ENSG00000128050/ENSG00000101856/ENSG00000151012/ENSG00000163655/ENSG00000162769/ENSG00000066926/ENSG00000062038/ENSG00000110911/ENSG00000181873/ENSG00000185664/ENSG00000164175/ENSG00000165240/ENSG00000077498/ENSG00000165704/ENSG00000082641…
GO:0001708	GO:0001708	cell fate specification	88	0.351011	1.62833	0.000589571	0.0151014	0.0125834	2513	tags=20%, list=6%, signal=19%	ENSG00000205927/ENSG00000125798/ENSG00000164690/ENSG00000154342/ENSG00000164438/ENSG00000106031/ENSG00000125820/ENSG00000186487/ENSG00000139352/ENSG00000159556/ENSG00000167800/ENSG00000104413/ENSG00000130675/ENSG00000148400/ENSG00000164532/ENSG00000184486/ENSG00000107984/ENSG00000122145
GO:0050892	GO:0050892	intestinal absorption	40	0.473377	1.88262	0.000596154	0.0151014	0.0125834	7333	tags=50%, list=19%, signal=41%	ENSG00000110243/ENSG00000170835/ENSG00000120756/ENSG00000140297/ENSG00000127831/ENSG00000100170/ENSG00000180432/ENSG00000175535/ENSG00000111684/ENSG00000015520/ENSG00000130164/ENSG00000136381/ENSG00000143921/ENSG00000145384/ENSG00000111424/ENSG00000166391/ENSG00000122729/ENSG00000158769/ENSG00000225697/ENSG00000050405
GO:0071312	GO:0071312	cellular response to alkaloid	40	0.473293	1.88228	0.000596154	0.0151014	0.0125834	3937	tags=30%, list=10%, signal=27%	ENSG00000180176/ENSG00000132437/ENSG00000198626/ENSG00000109819/ENSG00000155897/ENSG00000081248/ENSG00000131771/ENSG00000131183/ENSG00000145386/ENSG00000095209/ENSG00000197299/ENSG00000051180
GO:0006085	GO:0006085	acetyl-CoA biosynthetic process	17	0.660618	2.09193	0.000596493	0.0151014	0.0125834	9053	tags=65%, list=23%, signal=50%	ENSG00000150768/ENSG00000075239/ENSG00000091140/ENSG00000131473/ENSG00000143158/ENSG00000127125/ENSG00000131069/ENSG00000131828/ENSG00000152256/ENSG00000110435/ENSG00000005882
GO:0007159	GO:0007159	leukocyte cell-cell adhesion	354	-0.41073	-1.32587	0.000599908	0.0151014	0.0125834	10523	tags=36%, list=27%, signal=27%	ENSG00000110492/ENSG00000206503/ENSG00000163874/ENSG00000123338/ENSG00000121807/ENSG00000136244/ENSG00000175467/ENSG00000196839/ENSG00000010810/ENSG00000147437/ENSG00000012779/ENSG00000204287/ENSG00000090776/ENSG00000049768/ENSG00000167604/ENSG00000158473/ENSG00000117281/ENSG00000242574/ENSG00000160255/ENSG00000196735/ENSG00000134242/ENSG00000276231/ENSG00000020633/ENSG00000108947/ENSG00000007908…
GO:0008053	GO:0008053	mitochondrial fusion	27	0.535488	1.95118	0.000601418	0.0151014	0.0125834	10723	tags=63%, list=27%, signal=46%	ENSG00000104381/ENSG00000072274/ENSG00000176171/ENSG00000198836/ENSG00000185345/ENSG00000171109/ENSG00000141385/ENSG00000087470/ENSG00000180488/ENSG00000116688/ENSG00000086758/ENSG00000135093/ENSG00000106554/ENSG00000153823/ENSG00000168958/ENSG00000090432/ENSG00000162600
GO:0009713	GO:0009713	catechol-containing compound biosynthetic process	19	0.613732	2.02276	0.000610819	0.0151986	0.0126644	356	tags=21%, list=1%, signal=21%	ENSG00000180176/ENSG00000142319/ENSG00000132437/ENSG00000173404
GO:0042423	GO:0042423	catecholamine biosynthetic process	19	0.613732	2.02276	0.000610819	0.0151986	0.0126644	356	tags=21%, list=1%, signal=21%	ENSG00000180176/ENSG00000142319/ENSG00000132437/ENSG00000173404
GO:1990542	GO:1990542	mitochondrial transmembrane transport	100	0.339211	1.65305	0.000619229	0.0153248	0.0127695	7841	tags=40%, list=20%, signal=32%	ENSG00000109424/ENSG00000182902/ENSG00000110090/ENSG00000004864/ENSG00000213585/ENSG00000154174/ENSG00000144381/ENSG00000198836/ENSG00000110955/ENSG00000163528/ENSG00000134375/ENSG00000005022/ENSG00000138035/ENSG00000141385/ENSG00000164284/ENSG00000150756/ENSG00000171612/ENSG00000050393/ENSG00000124532/ENSG00000157184/ENSG00000173726/ENSG00000060762/ENSG00000120675/ENSG00000075415/ENSG00000156709…
GO:2000209	GO:2000209	regulation of anoikis	24	0.571962	1.96665	0.000621462	0.0153248	0.0127695	4426	tags=29%, list=11%, signal=26%	ENSG00000086548/ENSG00000105388/ENSG00000148400/ENSG00000169398/ENSG00000150093/ENSG00000196781/ENSG00000141378
GO:0030004	GO:0030004	cellular monovalent inorganic cation homeostasis	103	0.331208	1.61443	0.000629716	0.0154173	0.0128466	7635	tags=36%, list=19%, signal=29%	ENSG00000115616/ENSG00000105929/ENSG00000008196/ENSG00000179331/ENSG00000137561/ENSG00000105409/ENSG00000186009/ENSG00000178301/ENSG00000169504/ENSG00000168748/ENSG00000163399/ENSG00000131238/ENSG00000110955/ENSG00000187446/ENSG00000064651/ENSG00000106460/ENSG00000128973/ENSG00000134851/ENSG00000143153/ENSG00000047249/ENSG00000179630/ENSG00000132681/ENSG00000100030/ENSG00000182220/ENSG00000166148…
GO:0000956	GO:0000956	nuclear-transcribed mRNA catabolic process	110	0.33133	1.61101	0.000630823	0.0154173	0.0128466	11108	tags=45%, list=28%, signal=33%	ENSG00000188613/ENSG00000070756/ENSG00000104408/ENSG00000121274/ENSG00000125107/ENSG00000146453/ENSG00000120705/ENSG00000198677/ENSG00000108349/ENSG00000152684/ENSG00000136937/ENSG00000123908/ENSG00000103342/ENSG00000107951/ENSG00000141232/ENSG00000107864/ENSG00000113300/ENSG00000165630/ENSG00000175324/ENSG00000174840/ENSG00000083520/ENSG00000167447/ENSG00000088930/ENSG00000056586/ENSG00000179134…
GO:0090141	GO:0090141	positive regulation of mitochondrial fission	21	0.600844	2.02127	0.00064038	0.0155214	0.0129334	10628	tags=76%, list=27%, signal=56%	ENSG00000176171/ENSG00000069329/ENSG00000185345/ENSG00000087470/ENSG00000100335/ENSG00000134278/ENSG00000198060/ENSG00000247077/ENSG00000006451/ENSG00000087586/ENSG00000017797/ENSG00000156026/ENSG00000128052/ENSG00000168958/ENSG00000011465/ENSG00000090432
GO:0032365	GO:0032365	intracellular lipid transport	41	0.4551	1.82492	0.000640728	0.0155214	0.0129334	7051	tags=51%, list=18%, signal=42%	ENSG00000144452/ENSG00000110090/ENSG00000121769/ENSG00000130164/ENSG00000153989/ENSG00000141458/ENSG00000110048/ENSG00000116171/ENSG00000182718/ENSG00000157184/ENSG00000122335/ENSG00000113163/ENSG00000101986/ENSG00000126821/ENSG00000134108/ENSG00000130703/ENSG00000173409/ENSG00000134297/ENSG00000106086/ENSG00000070018/ENSG00000165029
GO:1903008	GO:1903008	organelle disassembly	114	0.333047	1.68716	0.000654832	0.0157935	0.0131601	10796	tags=49%, list=27%, signal=36%	ENSG00000109819/ENSG00000127252/ENSG00000176171/ENSG00000100644/ENSG00000213585/ENSG00000104231/ENSG00000023287/ENSG00000170759/ENSG00000152684/ENSG00000005022/ENSG00000185345/ENSG00000176485/ENSG00000078237/ENSG00000161011/ENSG00000177628/ENSG00000163071/ENSG00000087470/ENSG00000198911/ENSG00000164347/ENSG00000014123/ENSG00000139726/ENSG00000198925/ENSG00000139112/ENSG00000170312/ENSG00000085760…
GO:0006103	GO:0006103	2-oxoglutarate metabolic process	18	0.625005	2.0352	0.000658297	0.0158077	0.013172	7570	tags=72%, list=19%, signal=58%	ENSG00000166123/ENSG00000198650/ENSG00000182054/ENSG00000138413/ENSG00000107537/ENSG00000120053/ENSG00000091140/ENSG00000087299/ENSG00000125166/ENSG00000105953/ENSG00000119689/ENSG00000109576/ENSG00000134056
GO:2000104	GO:2000104	negative regulation of DNA-dependent DNA replication	15	0.71115	2.15261	0.000661447	0.0158143	0.0131775	8430	tags=73%, list=21%, signal=58%	ENSG00000197299/ENSG00000112029/ENSG00000139618/ENSG00000075131/ENSG00000112312/ENSG00000159147/ENSG00000134452/ENSG00000111602/ENSG00000005156/ENSG00000197548/ENSG00000121988
GO:0031341	GO:0031341	regulation of cell killing	98	-0.498938	-1.53966	0.000670261	0.0159557	0.0132953	10520	tags=47%, list=27%, signal=35%	ENSG00000206503/ENSG00000150637/ENSG00000123338/ENSG00000134545/ENSG00000204287/ENSG00000158473/ENSG00000117281/ENSG00000234745/ENSG00000276231/ENSG00000143184/ENSG00000066336/ENSG00000073754/ENSG00000196126/ENSG00000205420/ENSG00000204632/ENSG00000110944/ENSG00000081237/ENSG00000168685/ENSG00000205809/ENSG00000113302/ENSG00000213809/ENSG00000204642/ENSG00000115607/ENSG00000189013/ENSG00000096996…
GO:1901264	GO:1901264	carbohydrate derivative transport	81	0.362343	1.64874	0.000675533	0.0160119	0.0133421	7180	tags=38%, list=18%, signal=31%	ENSG00000169562/ENSG00000156222/ENSG00000168389/ENSG00000100170/ENSG00000185933/ENSG00000112759/ENSG00000125257/ENSG00000163406/ENSG00000183128/ENSG00000147852/ENSG00000169241/ENSG00000102100/ENSG00000137860/ENSG00000005022/ENSG00000171017/ENSG00000120519/ENSG00000091262/ENSG00000124786/ENSG00000101986/ENSG00000174669/ENSG00000138459/ENSG00000160190/ENSG00000157593/ENSG00000117620/ENSG00000137700…
GO:0009070	GO:0009070	serine family amino acid biosynthetic process	20	0.593244	1.99074	0.000721495	0.0170279	0.0141887	5909	tags=50%, list=15%, signal=43%	ENSG00000172482/ENSG00000164300/ENSG00000160200/ENSG00000179918/ENSG00000135069/ENSG00000182199/ENSG00000228716/ENSG00000132824/ENSG00000146733/ENSG00000116761
GO:0051784	GO:0051784	negative regulation of nuclear division	55	0.412574	1.78183	0.000737987	0.0173427	0.014451	9719	tags=53%, list=25%, signal=40%	ENSG00000137090/ENSG00000164754/ENSG00000172167/ENSG00000121101/ENSG00000086827/ENSG00000149554/ENSG00000174442/ENSG00000164109/ENSG00000156970/ENSG00000112029/ENSG00000117724/ENSG00000113456/ENSG00000134057/ENSG00000169679/ENSG00000143452/ENSG00000125378/ENSG00000112742/ENSG00000134982/ENSG00000040275/ENSG00000071539/ENSG00000166851/ENSG00000122952/ENSG00000124688/ENSG00000178295/ENSG00000080986…
GO:0045022	GO:0045022	early endosome to late endosome transport	39	0.465681	1.85291	0.000754913	0.017665	0.0147195	10103	tags=56%, list=26%, signal=42%	ENSG00000137710/ENSG00000169032/ENSG00000144566/ENSG00000102189/ENSG00000087053/ENSG00000115561/ENSG00000138246/ENSG00000166971/ENSG00000105186/ENSG00000134709/ENSG00000100030/ENSG00000080371/ENSG00000168172/ENSG00000164715/ENSG00000153071/ENSG00000075785/ENSG00000089177/ENSG00000104497/ENSG00000112335/ENSG00000213853/ENSG00000119979/ENSG00000126581
GO:0061041	GO:0061041	regulation of wound healing	124	0.310372	1.54043	0.000764935	0.0178236	0.0148518	5823	tags=26%, list=15%, signal=22%	ENSG00000171557/ENSG00000171564/ENSG00000125798/ENSG00000080618/ENSG00000003436/ENSG00000163347/ENSG00000164251/ENSG00000127831/ENSG00000156535/ENSG00000122194/ENSG00000261150/ENSG00000197822/ENSG00000113161/ENSG00000169398/ENSG00000173083/ENSG00000150093/ENSG00000064651/ENSG00000066777/ENSG00000078401/ENSG00000110080/ENSG00000177119/ENSG00000171560/ENSG00000219438/ENSG00000107104/ENSG00000185532…
GO:0006983	GO:0006983	ER overload response	13	0.726681	2.1292	0.000778864	0.0180716	0.0150584	8799	tags=77%, list=22%, signal=60%	ENSG00000108588/ENSG00000172071/ENSG00000158615/ENSG00000143183/ENSG00000082701/ENSG00000044574/ENSG00000131871/ENSG00000109501/ENSG00000153094/ENSG00000152348
GO:1901606	GO:1901606	alpha-amino acid catabolic process	87	0.342203	1.56932	0.000811714	0.0187547	0.0156276	4798	tags=31%, list=12%, signal=27%	ENSG00000172482/ENSG00000117009/ENSG00000128683/ENSG00000103316/ENSG00000136750/ENSG00000100033/ENSG00000115919/ENSG00000113924/ENSG00000166123/ENSG00000162174/ENSG00000151790/ENSG00000198650/ENSG00000160200/ENSG00000132541/ENSG00000075239/ENSG00000128059/ENSG00000103876/ENSG00000159423/ENSG00000182199/ENSG00000120053/ENSG00000183077/ENSG00000188266/ENSG00000065154/ENSG00000124275/ENSG00000058668…
GO:1901616	GO:1901616	organic hydroxy compound catabolic process	74	0.366087	1.59707	0.000816048	0.0187759	0.0156453	5456	tags=34%, list=14%, signal=29%	ENSG00000142319/ENSG00000170835/ENSG00000198074/ENSG00000109193/ENSG00000101188/ENSG00000104331/ENSG00000140263/ENSG00000122787/ENSG00000128039/ENSG00000197165/ENSG00000211448/ENSG00000166816/ENSG00000103876/ENSG00000122126/ENSG00000132746/ENSG00000133731/ENSG00000141401/ENSG00000159082/ENSG00000115159/ENSG00000173597/ENSG00000087053/ENSG00000078269/ENSG00000025423/ENSG00000162813/ENSG00000068383
GO:0046112	GO:0046112	nucleobase biosynthetic process	18	0.616089	2.00617	0.000821299	0.018818	0.0156803	9675	tags=72%, list=24%, signal=55%	ENSG00000128059/ENSG00000159131/ENSG00000182199/ENSG00000128050/ENSG00000163655/ENSG00000162368/ENSG00000171793/ENSG00000047230/ENSG00000114491/ENSG00000165704/ENSG00000147224/ENSG00000198793/ENSG00000102967
GO:0042440	GO:0042440	pigment metabolic process	79	0.364452	1.63122	0.000834082	0.0190316	0.0158583	7998	tags=39%, list=20%, signal=31%	ENSG00000023839/ENSG00000196517/ENSG00000109819/ENSG00000107165/ENSG00000054277/ENSG00000203668/ENSG00000128059/ENSG00000135776/ENSG00000159131/ENSG00000182199/ENSG00000134538/ENSG00000136381/ENSG00000104044/ENSG00000128050/ENSG00000101856/ENSG00000151012/ENSG00000163655/ENSG00000162769/ENSG00000066926/ENSG00000062038/ENSG00000110911/ENSG00000181873/ENSG00000185664/ENSG00000164175/ENSG00000165240…
GO:0019751	GO:0019751	polyol metabolic process	110	0.326305	1.58658	0.000839437	0.0190747	0.0158942	6426	tags=40%, list=16%, signal=34%	ENSG00000101188/ENSG00000198049/ENSG00000151151/ENSG00000138669/ENSG00000104331/ENSG00000140263/ENSG00000131183/ENSG00000078124/ENSG00000188611/ENSG00000138744/ENSG00000169860/ENSG00000196639/ENSG00000120053/ENSG00000122126/ENSG00000100596/ENSG00000177076/ENSG00000133731/ENSG00000141401/ENSG00000116711/ENSG00000228716/ENSG00000177628/ENSG00000163082/ENSG00000159082/ENSG00000127080/ENSG00000173598…
GO:0008542	GO:0008542	visual learning	43	0.441575	1.81476	0.000853619	0.0193171	0.0160962	6382	tags=40%, list=16%, signal=33%	ENSG00000160716/ENSG00000187094/ENSG00000157404/ENSG00000131771/ENSG00000100644/ENSG00000113161/ENSG00000156642/ENSG00000196639/ENSG00000150093/ENSG00000133703/ENSG00000151012/ENSG00000166342/ENSG00000196712/ENSG00000142192/ENSG00000183454/ENSG00000033800/ENSG00000166349
GO:0046519	GO:0046519	sphingoid metabolic process	21	0.591985	1.99146	0.000860602	0.0193953	0.0161613	5514	tags=52%, list=14%, signal=45%	ENSG00000078124/ENSG00000188611/ENSG00000138744/ENSG00000100596/ENSG00000177076/ENSG00000177628/ENSG00000163082/ENSG00000204147/ENSG00000172296/ENSG00000090054/ENSG00000126821
GO:0034312	GO:0034312	diol biosynthetic process	20	0.585493	1.96473	0.000875596	0.0195732	0.0163096	5450	tags=55%, list=14%, signal=47%	ENSG00000078124/ENSG00000188611/ENSG00000100596/ENSG00000177076/ENSG00000228716/ENSG00000177628/ENSG00000131979/ENSG00000150787/ENSG00000204147/ENSG00000172296/ENSG00000090054
GO:0048857	GO:0048857	neural nucleus development	63	0.390774	1.7386	0.000875781	0.0195732	0.0163096	7147	tags=37%, list=18%, signal=30%	ENSG00000160716/ENSG00000139352/ENSG00000184254/ENSG00000171450/ENSG00000114450/ENSG00000117115/ENSG00000160211/ENSG00000173917/ENSG00000234289/ENSG00000143933/ENSG00000148396/ENSG00000113456/ENSG00000176749/ENSG00000148798/ENSG00000044574/ENSG00000198668/ENSG00000134308/ENSG00000138802/ENSG00000148672/ENSG00000163848/ENSG00000111707/ENSG00000004848/ENSG00000154723
GO:1901800	GO:1901800	positive regulation of proteasomal protein catabolic process	112	0.316343	1.57541	0.000879174	0.0195732	0.0163096	8115	tags=35%, list=20%, signal=28%	ENSG00000159197/ENSG00000137393/ENSG00000101255/ENSG00000169139/ENSG00000167196/ENSG00000001084/ENSG00000164287/ENSG00000166233/ENSG00000185345/ENSG00000113712/ENSG00000139324/ENSG00000050748/ENSG00000177628/ENSG00000034677/ENSG00000163743/ENSG00000135018/ENSG00000058056/ENSG00000013561/ENSG00000082701/ENSG00000100764/ENSG00000180008/ENSG00000101843/ENSG00000051108/ENSG00000033800/ENSG00000176046…
GO:0022616	GO:0022616	DNA strand elongation	22	0.593665	2.02559	0.000888409	0.0196657	0.0163867	8893	tags=64%, list=22%, signal=49%	ENSG00000104738/ENSG00000133119/ENSG00000104320/ENSG00000077514/ENSG00000101003/ENSG00000020922/ENSG00000132646/ENSG00000163918/ENSG00000138346/ENSG00000069275/ENSG00000101868/ENSG00000005156/ENSG00000148229/ENSG00000112118
GO:0045943	GO:0045943	positive regulation of transcription by RNA polymerase I	23	0.576013	1.9693	0.000890484	0.0196657	0.0163867	10959	tags=74%, list=28%, signal=53%	ENSG00000141736/ENSG00000172071/ENSG00000166986/ENSG00000169594/ENSG00000127080/ENSG00000119285/ENSG00000164338/ENSG00000130935/ENSG00000163811/ENSG00000136045/ENSG00000005100/ENSG00000172943/ENSG00000122035/ENSG00000198793/ENSG00000128272/ENSG00000127616/ENSG00000115053
GO:0048488	GO:0048488	synaptic vesicle endocytosis	62	0.397218	1.74243	0.000908829	0.019911	0.016591	6555	tags=27%, list=17%, signal=23%	ENSG00000074317/ENSG00000170835/ENSG00000179869/ENSG00000129990/ENSG00000102003/ENSG00000146938/ENSG00000127022/ENSG00000073921/ENSG00000181856/ENSG00000159082/ENSG00000087470/ENSG00000078269/ENSG00000117533/ENSG00000041353/ENSG00000198668/ENSG00000157107/ENSG00000116675
GO:0140238	GO:0140238	presynaptic endocytosis	62	0.397218	1.74243	0.000908829	0.019911	0.016591	6555	tags=27%, list=17%, signal=23%	ENSG00000074317/ENSG00000170835/ENSG00000179869/ENSG00000129990/ENSG00000102003/ENSG00000146938/ENSG00000127022/ENSG00000073921/ENSG00000181856/ENSG00000159082/ENSG00000087470/ENSG00000078269/ENSG00000117533/ENSG00000041353/ENSG00000198668/ENSG00000157107/ENSG00000116675
GO:0071364	GO:0071364	cellular response to epidermal growth factor stimulus	45	0.445338	1.83571	0.000950525	0.0206298	0.01719	8313	tags=42%, list=21%, signal=33%	ENSG00000141736/ENSG00000127831/ENSG00000125686/ENSG00000179295/ENSG00000169895/ENSG00000166986/ENSG00000140575/ENSG00000128944/ENSG00000140992/ENSG00000146648/ENSG00000109917/ENSG00000141441/ENSG00000073417/ENSG00000136848/ENSG00000110395/ENSG00000108861/ENSG00000156735/ENSG00000129515/ENSG00000127947
GO:0042572	GO:0042572	retinol metabolic process	50	0.401817	1.69797	0.000952235	0.0206298	0.01719	2110	tags=20%, list=5%, signal=19%	ENSG00000147160/ENSG00000170786/ENSG00000227471/ENSG00000198074/ENSG00000184254/ENSG00000196344/ENSG00000121207/ENSG00000121039/ENSG00000139547/ENSG00000175535
GO:0016239	GO:0016239	positive regulation of macroautophagy	63	0.389536	1.73308	0.000952893	0.0206298	0.01719	10352	tags=51%, list=26%, signal=38%	ENSG00000135413/ENSG00000152137/ENSG00000176171/ENSG00000100644/ENSG00000213585/ENSG00000118873/ENSG00000136436/ENSG00000100596/ENSG00000198382/ENSG00000005022/ENSG00000166908/ENSG00000153130/ENSG00000168092/ENSG00000090054/ENSG00000155506/ENSG00000104312/ENSG00000183735/ENSG00000115839/ENSG00000112425/ENSG00000096717/ENSG00000095787/ENSG00000048707/ENSG00000144118/ENSG00000163820/ENSG00000128052…
GO:0001732	GO:0001732	formation of cytoplasmic translation initiation complex	16	0.665749	2.06123	0.000976993	0.0210553	0.0175446	6261	tags=50%, list=16%, signal=42%	ENSG00000147677/ENSG00000104408/ENSG00000104131/ENSG00000205609/ENSG00000125977/ENSG00000184110/ENSG00000100129/ENSG00000100664
GO:0000387	GO:0000387	spliceosomal snRNP assembly	47	0.431789	1.7975	0.000980206	0.0210553	0.0175446	564	tags=6%, list=1%, signal=6%	ENSG00000200156/ENSG00000199568/ENSG00000200169
GO:0006563	GO:0006563	L-serine metabolic process	11	0.74271	2.03273	0.000986106	0.0210996	0.0175815	5646	tags=64%, list=14%, signal=55%	ENSG00000164300/ENSG00000160200/ENSG00000135069/ENSG00000182199/ENSG00000135094/ENSG00000132824/ENSG00000146733
GO:0022600	GO:0022600	digestive system process	99	0.323177	1.56159	0.000997416	0.0211857	0.0176532	4247	tags=28%, list=11%, signal=25%	ENSG00000110243/ENSG00000170835/ENSG00000113389/ENSG00000162992/ENSG00000121853/ENSG00000082556/ENSG00000168539/ENSG00000133019/ENSG00000120756/ENSG00000163362/ENSG00000140297/ENSG00000127831/ENSG00000100170/ENSG00000180432/ENSG00000161798/ENSG00000175535/ENSG00000111684/ENSG00000015520/ENSG00000160181/ENSG00000173702/ENSG00000023734/ENSG00000130164/ENSG00000136381/ENSG00000147606/ENSG00000143921…
GO:0036109	GO:0036109	alpha-linolenic acid metabolic process	10	0.766447	2.03466	0.000997834	0.0211857	0.0176532	7236	tags=60%, list=18%, signal=49%	ENSG00000134824/ENSG00000149485/ENSG00000012660/ENSG00000116171/ENSG00000101986/ENSG00000066322
GO:0000244	GO:0000244	spliceosomal tri-snRNP complex assembly	23	0.569327	1.94644	0.00101657	0.0214718	0.0178916	564	tags=13%, list=1%, signal=13%	ENSG00000200156/ENSG00000199568/ENSG00000200169
GO:0034308	GO:0034308	primary alcohol metabolic process	98	0.325648	1.57633	0.00101912	0.0214718	0.0178916	2423	tags=17%, list=6%, signal=16%	ENSG00000147160/ENSG00000170786/ENSG00000227471/ENSG00000198074/ENSG00000109193/ENSG00000184254/ENSG00000196344/ENSG00000014257/ENSG00000102886/ENSG00000121207/ENSG00000121039/ENSG00000139547/ENSG00000175535/ENSG00000197165/ENSG00000151632/ENSG00000072210/ENSG00000138744
GO:0007032	GO:0007032	endosome organization	81	0.349706	1.59124	0.0010581	0.0222081	0.0185051	7279	tags=41%, list=18%, signal=33%	ENSG00000164961/ENSG00000104341/ENSG00000178301/ENSG00000038210/ENSG00000138760/ENSG00000103769/ENSG00000009844/ENSG00000164695/ENSG00000185345/ENSG00000170248/ENSG00000116903/ENSG00000083937/ENSG00000161011/ENSG00000136738/ENSG00000159082/ENSG00000102189/ENSG00000138592/ENSG00000115561/ENSG00000110880/ENSG00000138246/ENSG00000166971/ENSG00000124198/ENSG00000117533/ENSG00000134709/ENSG00000173456…
GO:0006513	GO:0006513	protein monoubiquitination	67	0.389109	1.74471	0.00106485	0.0222538	0.0185432	8675	tags=48%, list=22%, signal=37%	ENSG00000104343/ENSG00000077152/ENSG00000185345/ENSG00000163961/ENSG00000134371/ENSG00000166477/ENSG00000143476/ENSG00000036257/ENSG00000183337/ENSG00000119048/ENSG00000166349/ENSG00000170142/ENSG00000158290/ENSG00000113558/ENSG00000152193/ENSG00000110395/ENSG00000110330/ENSG00000136536/ENSG00000109332/ENSG00000155827/ENSG00000095787/ENSG00000117153/ENSG00000070950/ENSG00000163602/ENSG00000187790…
GO:0035270	GO:0035270	endocrine system development	124	0.306398	1.52071	0.00106837	0.0222538	0.0185432	5796	tags=27%, list=15%, signal=23%	ENSG00000142319/ENSG00000125798/ENSG00000164690/ENSG00000173404/ENSG00000139515/ENSG00000162992/ENSG00000125820/ENSG00000119547/ENSG00000169856/ENSG00000139352/ENSG00000145545/ENSG00000039068/ENSG00000184937/ENSG00000130675/ENSG00000171540/ENSG00000069011/ENSG00000184486/ENSG00000106799/ENSG00000169032/ENSG00000138083/ENSG00000076864/ENSG00000172071/ENSG00000007372/ENSG00000134852/ENSG00000196712…
GO:0042403	GO:0042403	thyroid hormone metabolic process	26	0.555802	1.98839	0.00109366	0.0225667	0.0188039	4657	tags=35%, list=12%, signal=31%	ENSG00000009765/ENSG00000211452/ENSG00000103316/ENSG00000147100/ENSG00000140254/ENSG00000125686/ENSG00000211448/ENSG00000105641/ENSG00000173597
GO:0015936	GO:0015936	coenzyme A metabolic process	18	0.607347	1.9777	0.00109715	0.0225667	0.0188039	8843	tags=56%, list=22%, signal=43%	ENSG00000113161/ENSG00000075239/ENSG00000140876/ENSG00000120137/ENSG00000213965/ENSG00000131473/ENSG00000131844/ENSG00000127125/ENSG00000122912/ENSG00000152782
GO:0051306	GO:0051306	mitotic sister chromatid separation	66	0.387612	1.70001	0.00110258	0.0225667	0.0188039	9532	tags=55%, list=24%, signal=41%	ENSG00000164754/ENSG00000121101/ENSG00000156831/ENSG00000086827/ENSG00000174442/ENSG00000164109/ENSG00000058729/ENSG00000138778/ENSG00000156970/ENSG00000112029/ENSG00000117724/ENSG00000138411/ENSG00000134057/ENSG00000153107/ENSG00000169679/ENSG00000094804/ENSG00000119408/ENSG00000094880/ENSG00000112742/ENSG00000004897/ENSG00000036257/ENSG00000126787/ENSG00000134982/ENSG00000040275/ENSG00000071539…
GO:0006584	GO:0006584	catecholamine metabolic process	52	0.401461	1.7242	0.00110392	0.0225667	0.0188039	356	tags=12%, list=1%, signal=11%	ENSG00000180176/ENSG00000142319/ENSG00000132437/ENSG00000160716/ENSG00000074317/ENSG00000173404
GO:0009712	GO:0009712	catechol-containing compound metabolic process	52	0.401461	1.7242	0.00110392	0.0225667	0.0188039	356	tags=12%, list=1%, signal=11%	ENSG00000180176/ENSG00000142319/ENSG00000132437/ENSG00000160716/ENSG00000074317/ENSG00000173404
GO:0003333	GO:0003333	amino acid transmembrane transport	95	0.321212	1.5143	0.00111177	0.022643	0.0188675	4239	tags=24%, list=11%, signal=22%	ENSG00000072041/ENSG00000196517/ENSG00000101188/ENSG00000105143/ENSG00000152822/ENSG00000147100/ENSG00000182902/ENSG00000139514/ENSG00000180773/ENSG00000186335/ENSG00000174899/ENSG00000174358/ENSG00000111371/ENSG00000004864/ENSG00000105281/ENSG00000150093/ENSG00000151012/ENSG00000103064/ENSG00000103257/ENSG00000171017/ENSG00000179520/ENSG00000117152/ENSG00000134294
GO:0017158	GO:0017158	regulation of calcium ion-dependent exocytosis	39	0.453964	1.80629	0.00112285	0.0227843	0.0189853	2369	tags=21%, list=6%, signal=19%	ENSG00000132872/ENSG00000213023/ENSG00000129990/ENSG00000165125/ENSG00000171450/ENSG00000019505/ENSG00000148400/ENSG00000174437
GO:0055081	GO:0055081	anion homeostasis	38	0.450875	1.80222	0.0011474	0.0230483	0.0192052	5713	tags=34%, list=14%, signal=29%	ENSG00000023839/ENSG00000074803/ENSG00000160867/ENSG00000008196/ENSG00000131183/ENSG00000151012/ENSG00000221955/ENSG00000064651/ENSG00000008283/ENSG00000070915/ENSG00000091262/ENSG00000074410/ENSG00000143324
GO:0006720	GO:0006720	isoprenoid metabolic process	112	0.312972	1.55862	0.00114808	0.0230483	0.0192052	6090	tags=30%, list=15%, signal=26%	ENSG00000147160/ENSG00000180176/ENSG00000170786/ENSG00000227471/ENSG00000198074/ENSG00000148377/ENSG00000067064/ENSG00000184254/ENSG00000196344/ENSG00000112972/ENSG00000121207/ENSG00000121039/ENSG00000139547/ENSG00000145545/ENSG00000128039/ENSG00000175535/ENSG00000072210/ENSG00000172269/ENSG00000113161/ENSG00000107537/ENSG00000079459/ENSG00000164494/ENSG00000153989/ENSG00000160752/ENSG00000214960…
GO:0140056	GO:0140056	organelle localization by membrane tethering	78	0.346113	1.54937	0.00114843	0.0230483	0.0192052	10207	tags=46%, list=26%, signal=34%	ENSG00000145920/ENSG00000169213/ENSG00000175318/ENSG00000178750/ENSG00000105514/ENSG00000174437/ENSG00000073969/ENSG00000177380/ENSG00000138768/ENSG00000158220/ENSG00000166900/ENSG00000184178/ENSG00000137501/ENSG00000117868/ENSG00000130477/ENSG00000124164/ENSG00000198668/ENSG00000084733/ENSG00000117758/ENSG00000165650/ENSG00000135823/ENSG00000198722/ENSG00000106636/ENSG00000139641/ENSG00000144118…
GO:0006892	GO:0006892	post-Golgi vesicle-mediated transport	103	0.317986	1.54998	0.00120353	0.0240663	0.0200535	10417	tags=56%, list=26%, signal=42%	ENSG00000142197/ENSG00000123983/ENSG00000120992/ENSG00000147533/ENSG00000073969/ENSG00000166747/ENSG00000144674/ENSG00000168461/ENSG00000113384/ENSG00000119396/ENSG00000138078/ENSG00000116903/ENSG00000151150/ENSG00000117475/ENSG00000177879/ENSG00000148396/ENSG00000183155/ENSG00000070367/ENSG00000112685/ENSG00000017260/ENSG00000085365/ENSG00000124198/ENSG00000076321/ENSG00000084733/ENSG00000143952…
GO:0051303	GO:0051303	establishment of chromosome localization	79	0.352978	1.57986	0.00129582	0.0258177	0.0215129	10779	tags=58%, list=27%, signal=42%	ENSG00000167014/ENSG00000168070/ENSG00000118193/ENSG00000155816/ENSG00000101447/ENSG00000086827/ENSG00000143228/ENSG00000103769/ENSG00000164695/ENSG00000176623/ENSG00000138778/ENSG00000198824/ENSG00000083937/ENSG00000117724/ENSG00000138071/ENSG00000134057/ENSG00000161609/ENSG00000031691/ENSG00000147601/ENSG00000094880/ENSG00000036257/ENSG00000121621/ENSG00000126787/ENSG00000119048/ENSG00000085415…
GO:0021587	GO:0021587	cerebellum morphogenesis	39	0.449873	1.79001	0.00131328	0.0259923	0.0216584	5607	tags=36%, list=14%, signal=31%	ENSG00000089116/ENSG00000171798/ENSG00000273706/ENSG00000135472/ENSG00000102924/ENSG00000118193/ENSG00000169032/ENSG00000179295/ENSG00000138311/ENSG00000152208/ENSG00000177628/ENSG00000135049/ENSG00000105887/ENSG00000044574
GO:0030148	GO:0030148	sphingolipid biosynthetic process	104	0.32093	1.58105	0.00133145	0.0259923	0.0216584	7236	tags=38%, list=18%, signal=32%	ENSG00000174607/ENSG00000103089/ENSG00000143753/ENSG00000172057/ENSG00000206527/ENSG00000078124/ENSG00000165389/ENSG00000118402/ENSG00000164181/ENSG00000188611/ENSG00000172292/ENSG00000135454/ENSG00000196542/ENSG00000012660/ENSG00000074696/ENSG00000184389/ENSG00000100596/ENSG00000170522/ENSG00000132746/ENSG00000143418/ENSG00000177076/ENSG00000132356/ENSG00000008513/ENSG00000163590/ENSG00000177628…
GO:1902042	GO:1902042	negative regulation of extrinsic apoptotic signaling pathway via death domain receptors	30	0.51001	1.93723	0.00133672	0.0259923	0.0216584	283	tags=10%, list=1%, signal=10%	ENSG00000171557/ENSG00000171564/ENSG00000135472
GO:0014046	GO:0014046	dopamine secretion	36	0.470059	1.83699	0.0013411	0.0259923	0.0216584	1556	tags=22%, list=4%, signal=21%	ENSG00000101204/ENSG00000132872/ENSG00000168621/ENSG00000160716/ENSG00000213023/ENSG00000129990/ENSG00000082556/ENSG00000019505
GO:0014059	GO:0014059	regulation of dopamine secretion	36	0.470059	1.83699	0.0013411	0.0259923	0.0216584	1556	tags=22%, list=4%, signal=21%	ENSG00000101204/ENSG00000132872/ENSG00000168621/ENSG00000160716/ENSG00000213023/ENSG00000129990/ENSG00000082556/ENSG00000019505
GO:0090670	GO:0090670	RNA localization to Cajal body	19	0.58861	1.93996	0.00134712	0.0259923	0.0216584	11415	tags=84%, list=29%, signal=60%	ENSG00000120438/ENSG00000150753/ENSG00000156261/ENSG00000115484/ENSG00000166226/ENSG00000146731/ENSG00000145414/ENSG00000163468/ENSG00000130826/ENSG00000182117/ENSG00000175792/ENSG00000135624/ENSG00000145912/ENSG00000172795/ENSG00000140694/ENSG00000144736
GO:0090671	GO:0090671	telomerase RNA localization to Cajal body	19	0.58861	1.93996	0.00134712	0.0259923	0.0216584	11415	tags=84%, list=29%, signal=60%	ENSG00000120438/ENSG00000150753/ENSG00000156261/ENSG00000115484/ENSG00000166226/ENSG00000146731/ENSG00000145414/ENSG00000163468/ENSG00000130826/ENSG00000182117/ENSG00000175792/ENSG00000135624/ENSG00000145912/ENSG00000172795/ENSG00000140694/ENSG00000144736
GO:0090672	GO:0090672	telomerase RNA localization	19	0.58861	1.93996	0.00134712	0.0259923	0.0216584	11415	tags=84%, list=29%, signal=60%	ENSG00000120438/ENSG00000150753/ENSG00000156261/ENSG00000115484/ENSG00000166226/ENSG00000146731/ENSG00000145414/ENSG00000163468/ENSG00000130826/ENSG00000182117/ENSG00000175792/ENSG00000135624/ENSG00000145912/ENSG00000172795/ENSG00000140694/ENSG00000144736
GO:0090685	GO:0090685	RNA localization to nucleus	19	0.58861	1.93996	0.00134712	0.0259923	0.0216584	11415	tags=84%, list=29%, signal=60%	ENSG00000120438/ENSG00000150753/ENSG00000156261/ENSG00000115484/ENSG00000166226/ENSG00000146731/ENSG00000145414/ENSG00000163468/ENSG00000130826/ENSG00000182117/ENSG00000175792/ENSG00000135624/ENSG00000145912/ENSG00000172795/ENSG00000140694/ENSG00000144736
GO:0008334	GO:0008334	histone mRNA metabolic process	17	0.631234	1.99888	0.001353	0.0260144	0.0216768	11277	tags=71%, list=28%, signal=51%	ENSG00000121274/ENSG00000107951/ENSG00000175324/ENSG00000142528/ENSG00000165934/ENSG00000163950/ENSG00000114127/ENSG00000138385/ENSG00000155858/ENSG00000172795/ENSG00000119203/ENSG00000164329
GO:0009312	GO:0009312	oligosaccharide biosynthetic process	29	0.516276	1.92318	0.00136363	0.0261276	0.0217711	2939	tags=24%, list=7%, signal=22%	ENSG00000167080/ENSG00000156413/ENSG00000167531/ENSG00000070526/ENSG00000171124/ENSG00000183778/ENSG00000176920
GO:0018196	GO:0018196	peptidyl-asparagine modification	24	0.546492	1.87907	0.00139601	0.0266302	0.0221899	7728	tags=54%, list=20%, signal=44%	ENSG00000167080/ENSG00000163527/ENSG00000134910/ENSG00000159063/ENSG00000102158/ENSG00000118705/ENSG00000073849/ENSG00000136731/ENSG00000120697/ENSG00000198856/ENSG00000163902/ENSG00000244038/ENSG00000198833
GO:0001833	GO:0001833	inner cell mass cell proliferation	13	0.712694	2.08822	0.00139955	0.0266302	0.0221899	6249	tags=69%, list=16%, signal=58%	ENSG00000149554/ENSG00000126524/ENSG00000152684/ENSG00000147536/ENSG00000139618/ENSG00000101003/ENSG00000166200/ENSG00000146918/ENSG00000109917
GO:0051954	GO:0051954	positive regulation of amine transport	36	0.467848	1.82835	0.00140987	0.0267341	0.0222765	871	tags=19%, list=2%, signal=19%	ENSG00000168621/ENSG00000160716/ENSG00000117009/ENSG00000101188/ENSG00000169213/ENSG00000187094/ENSG00000082556
GO:0002706	GO:0002706	regulation of lymphocyte mediated immunity	164	-0.448308	-1.41414	0.00143236	0.0269561	0.0224615	11907	tags=44%, list=30%, signal=31%	ENSG00000116670/ENSG00000172575/ENSG00000232810/ENSG00000104972/ENSG00000168961/ENSG00000115604/ENSG00000105329/ENSG00000170542/ENSG00000206503/ENSG00000150637/ENSG00000123338/ENSG00000134545/ENSG00000121807/ENSG00000136244/ENSG00000204287/ENSG00000049768/ENSG00000158473/ENSG00000117281/ENSG00000234745/ENSG00000276231/ENSG00000143184/ENSG00000196126/ENSG00000125730/ENSG00000111679/ENSG00000187997…
GO:0006991	GO:0006991	response to sterol depletion	18	0.600311	1.95479	0.0014491	0.0269561	0.0224615	9392	tags=67%, list=24%, signal=51%	ENSG00000111684/ENSG00000015520/ENSG00000111412/ENSG00000086598/ENSG00000147475/ENSG00000198911/ENSG00000125629/ENSG00000107566/ENSG00000160685/ENSG00000144895/ENSG00000159461/ENSG00000072310
GO:0071501	GO:0071501	cellular response to sterol depletion	16	0.645885	1.99973	0.00145139	0.0269561	0.0224615	9392	tags=75%, list=24%, signal=57%	ENSG00000111684/ENSG00000015520/ENSG00000111412/ENSG00000086598/ENSG00000147475/ENSG00000198911/ENSG00000125629/ENSG00000107566/ENSG00000160685/ENSG00000144895/ENSG00000159461/ENSG00000072310
GO:0032253	GO:0032253	dense core granule localization	10	0.75318	1.99943	0.00145398	0.0269561	0.0224615	7550	tags=60%, list=19%, signal=49%	ENSG00000132872/ENSG00000155980/ENSG00000139220/ENSG00000170759/ENSG00000078018/ENSG00000147642
GO:0099519	GO:0099519	dense core granule cytoskeletal transport	10	0.75318	1.99943	0.00145398	0.0269561	0.0224615	7550	tags=60%, list=19%, signal=49%	ENSG00000132872/ENSG00000155980/ENSG00000139220/ENSG00000170759/ENSG00000078018/ENSG00000147642
GO:1901950	GO:1901950	dense core granule transport	10	0.75318	1.99943	0.00145398	0.0269561	0.0224615	7550	tags=60%, list=19%, signal=49%	ENSG00000132872/ENSG00000155980/ENSG00000139220/ENSG00000170759/ENSG00000078018/ENSG00000147642
GO:0000077	GO:0000077	DNA damage checkpoint signaling	113	0.313012	1.58688	0.00145589	0.0269561	0.0224615	10660	tags=52%, list=27%, signal=38%	ENSG00000253729/ENSG00000149554/ENSG00000179295/ENSG00000140534/ENSG00000135249/ENSG00000160551/ENSG00000168411/ENSG00000104320/ENSG00000143751/ENSG00000197299/ENSG00000169018/ENSG00000012048/ENSG00000092470/ENSG00000134852/ENSG00000008405/ENSG00000143155/ENSG00000113456/ENSG00000092853/ENSG00000095002/ENSG00000143476/ENSG00000075131/ENSG00000144554/ENSG00000020922/ENSG00000185515/ENSG00000112062…
GO:0051588	GO:0051588	regulation of neurotransmitter transport	97	0.318181	1.53513	0.00147784	0.0272568	0.022712	5416	tags=26%, list=14%, signal=22%	ENSG00000145920/ENSG00000132872/ENSG00000168621/ENSG00000117009/ENSG00000117971/ENSG00000102003/ENSG00000169213/ENSG00000169684/ENSG00000114646/ENSG00000174437/ENSG00000139220/ENSG00000169860/ENSG00000108306/ENSG00000164506/ENSG00000150093/ENSG00000117016/ENSG00000185345/ENSG00000144566/ENSG00000138078/ENSG00000087470/ENSG00000126858/ENSG00000166569/ENSG00000082701/ENSG00000107130/ENSG00000080644
GO:0006446	GO:0006446	regulation of translational initiation	75	0.347029	1.50898	0.00148205	0.0272568	0.022712	9637	tags=55%, list=24%, signal=41%	ENSG00000147677/ENSG00000187840/ENSG00000104408/ENSG00000102580/ENSG00000124374/ENSG00000185728/ENSG00000086598/ENSG00000172071/ENSG00000136937/ENSG00000158615/ENSG00000123908/ENSG00000067248/ENSG00000134001/ENSG00000172239/ENSG00000085760/ENSG00000155506/ENSG00000215301/ENSG00000128829/ENSG00000100664/ENSG00000181163/ENSG00000148730/ENSG00000114867/ENSG00000086232/ENSG00000120727/ENSG00000079785…
GO:0042447	GO:0042447	hormone catabolic process	11	0.72992	1.99773	0.0015039	0.0275664	0.0229701	5047	tags=64%, list=13%, signal=56%	ENSG00000109193/ENSG00000145545/ENSG00000211448/ENSG00000119912/ENSG00000118785/ENSG00000137869/ENSG00000025423
GO:0008037	GO:0008037	cell recognition	212	-0.43253	-1.37983	0.00152172	0.0278004	0.023165	5748	tags=29%, list=15%, signal=25%	ENSG00000276775/ENSG00000211892/ENSG00000123838/ENSG00000211964/ENSG00000184647/ENSG00000211955/ENSG00000224373/ENSG00000211944/ENSG00000211970/ENSG00000211976/ENSG00000122852/ENSG00000224650/ENSG00000211956/ENSG00000104938/ENSG00000211959/ENSG00000211890/ENSG00000211895/ENSG00000109943/ENSG00000211937/ENSG00000115257/ENSG00000180644/ENSG00000211973/ENSG00000280411/ENSG00000110448/ENSG00000211938…
GO:0051653	GO:0051653	spindle localization	55	0.397987	1.71883	0.00154068	0.0280536	0.023376	10833	tags=55%, list=27%, signal=40%	ENSG00000155816/ENSG00000153930/ENSG00000086827/ENSG00000066279/ENSG00000164109/ENSG00000215114/ENSG00000150093/ENSG00000007372/ENSG00000138071/ENSG00000161609/ENSG00000072803/ENSG00000134278/ENSG00000106299/ENSG00000040275/ENSG00000115091/ENSG00000007168/ENSG00000132846/ENSG00000186193/ENSG00000121957/ENSG00000166851/ENSG00000197102/ENSG00000135476/ENSG00000108424/ENSG00000080986/ENSG00000100345…
GO:0072160	GO:0072160	nephron tubule epithelial cell differentiation	14	0.658183	1.91973	0.00157898	0.0286562	0.0238781	4050	tags=36%, list=10%, signal=32%	ENSG00000273706/ENSG00000007062/ENSG00000272398/ENSG00000170873/ENSG00000137693
GO:0043367	GO:0043367	CD4-positive, alpha-beta T cell differentiation	82	-0.503339	-1.5299	0.0016019	0.0289765	0.024145	10498	tags=41%, list=27%, signal=31%	ENSG00000163874/ENSG00000123338/ENSG00000136244/ENSG00000169508/ENSG00000204287/ENSG00000049768/ENSG00000167604/ENSG00000020633/ENSG00000156127/ENSG00000138795/ENSG00000104856/ENSG00000196126/ENSG00000136630/ENSG00000150782/ENSG00000110944/ENSG00000113302/ENSG00000197471/ENSG00000185338/ENSG00000096996/ENSG00000122122/ENSG00000105639/ENSG00000198846/ENSG00000113520/ENSG00000137265/ENSG00000073861…
GO:1903131	GO:1903131	mononuclear cell differentiation	409	-0.395641	-1.28427	0.00161071	0.0290404	0.0241982	10727	tags=32%, list=27%, signal=24%	ENSG00000118046/ENSG00000010610/ENSG00000110492/ENSG00000163874/ENSG00000123338/ENSG00000196415/ENSG00000134545/ENSG00000121807/ENSG00000136244/ENSG00000175467/ENSG00000196839/ENSG00000169508/ENSG00000204287/ENSG00000123999/ENSG00000049768/ENSG00000167604/ENSG00000008438/ENSG00000158473/ENSG00000234745/ENSG00000134242/ENSG00000276231/ENSG00000120899/ENSG00000020633/ENSG00000152495/ENSG00000156127…
GO:0051452	GO:0051452	intracellular pH reduction	42	0.429907	1.75167	0.00165431	0.0296798	0.024731	7635	tags=40%, list=19%, signal=33%	ENSG00000105929/ENSG00000179331/ENSG00000137561/ENSG00000178301/ENSG00000169504/ENSG00000168748/ENSG00000131238/ENSG00000106460/ENSG00000128973/ENSG00000047249/ENSG00000182220/ENSG00000166148/ENSG00000123892/ENSG00000114062/ENSG00000109572/ENSG00000075785/ENSG00000033627
GO:0098930	GO:0098930	axonal transport	64	0.363278	1.60495	0.00165697	0.0296798	0.024731	8558	tags=55%, list=22%, signal=43%	ENSG00000155980/ENSG00000100644/ENSG00000103723/ENSG00000150672/ENSG00000198836/ENSG00000170759/ENSG00000154277/ENSG00000177879/ENSG00000132842/ENSG00000072803/ENSG00000102401/ENSG00000070718/ENSG00000054523/ENSG00000135049/ENSG00000090889/ENSG00000131437/ENSG00000041353/ENSG00000185009/ENSG00000080371/ENSG00000134108/ENSG00000021574/ENSG00000101350/ENSG00000078018/ENSG00000007168/ENSG00000173805…
GO:1904869	GO:1904869	regulation of protein localization to Cajal body	11	0.726693	1.98889	0.00168317	0.0299539	0.0249594	8365	tags=73%, list=21%, signal=57%	ENSG00000120438/ENSG00000150753/ENSG00000156261/ENSG00000115484/ENSG00000166226/ENSG00000146731/ENSG00000163468/ENSG00000130826
GO:1904871	GO:1904871	positive regulation of protein localization to Cajal body	11	0.726693	1.98889	0.00168317	0.0299539	0.0249594	8365	tags=73%, list=21%, signal=57%	ENSG00000120438/ENSG00000150753/ENSG00000156261/ENSG00000115484/ENSG00000166226/ENSG00000146731/ENSG00000163468/ENSG00000130826
GO:0046631	GO:0046631	alpha-beta T cell activation	154	-0.451828	-1.4211	0.0016945	0.0300583	0.0250464	10520	tags=40%, list=27%, signal=30%	ENSG00000206503/ENSG00000163874/ENSG00000123338/ENSG00000121807/ENSG00000136244/ENSG00000196839/ENSG00000169508/ENSG00000204287/ENSG00000049768/ENSG00000167604/ENSG00000117281/ENSG00000134242/ENSG00000020633/ENSG00000156127/ENSG00000138795/ENSG00000143184/ENSG00000104856/ENSG00000196126/ENSG00000065675/ENSG00000178562/ENSG00000107738/ENSG00000136630/ENSG00000125347/ENSG00000150782/ENSG00000128271…
GO:0009309	GO:0009309	amine biosynthetic process	36	0.462272	1.80656	0.00170789	0.0301983	0.0251631	2209	tags=19%, list=6%, signal=18%	ENSG00000180176/ENSG00000142319/ENSG00000132437/ENSG00000173404/ENSG00000155096/ENSG00000123505/ENSG00000197165
GO:0030259	GO:0030259	lipid glycosylation	11	0.726052	1.98714	0.00172301	0.030368	0.0253045	4899	tags=55%, list=12%, signal=48%	ENSG00000167080/ENSG00000135454/ENSG00000184389/ENSG00000110080/ENSG00000177628/ENSG00000175164
GO:0090649	GO:0090649	response to oxygen-glucose deprivation	11	0.725119	1.98458	0.00178276	0.0313208	0.0260984	8369	tags=73%, list=21%, signal=57%	ENSG00000165272/ENSG00000105835/ENSG00000176171/ENSG00000148346/ENSG00000087470/ENSG00000156709/ENSG00000110395/ENSG00000140299
GO:0044106	GO:0044106	cellular amine metabolic process	108	0.311094	1.51281	0.00180838	0.0316697	0.0263891	2423	tags=15%, list=6%, signal=14%	ENSG00000180176/ENSG00000142319/ENSG00000132437/ENSG00000023839/ENSG00000160716/ENSG00000074317/ENSG00000117009/ENSG00000173404/ENSG00000115919/ENSG00000102886/ENSG00000155096/ENSG00000123505/ENSG00000151790/ENSG00000197165/ENSG00000002726/ENSG00000138744
GO:0032943	GO:0032943	mononuclear cell proliferation	275	-0.415589	-1.33409	0.00181502	0.031685	0.0264019	10631	tags=37%, list=27%, signal=27%	ENSG00000105851/ENSG00000206503/ENSG00000123338/ENSG00000205220/ENSG00000121807/ENSG00000136244/ENSG00000196839/ENSG00000010810/ENSG00000147437/ENSG00000169508/ENSG00000090776/ENSG00000134215/ENSG00000049768/ENSG00000158473/ENSG00000242574/ENSG00000134242/ENSG00000006128/ENSG00000138795/ENSG00000115457/ENSG00000143184/ENSG00000196126/ENSG00000111679/ENSG00000065675/ENSG00000017427/ENSG00000115008…
GO:0060425	GO:0060425	lung morphogenesis	50	0.386996	1.63534	0.00184613	0.0321262	0.0267695	8429	tags=40%, list=21%, signal=32%	ENSG00000164690/ENSG00000121039/ENSG00000169032/ENSG00000083307/ENSG00000133703/ENSG00000137693/ENSG00000182197/ENSG00000132842/ENSG00000125378/ENSG00000100030/ENSG00000147655/ENSG00000138802/ENSG00000173402/ENSG00000103067/ENSG00000066468/ENSG00000176887/ENSG00000188064/ENSG00000105989/ENSG00000129514/ENSG00000101680
GO:0043276	GO:0043276	anoikis	34	0.470424	1.83408	0.00185203	0.0321271	0.0267703	4426	tags=21%, list=11%, signal=18%	ENSG00000086548/ENSG00000105388/ENSG00000148400/ENSG00000169398/ENSG00000150093/ENSG00000196781/ENSG00000141378
GO:0097067	GO:0097067	cellular response to thyroid hormone stimulus	17	0.619271	1.961	0.00186841	0.0323094	0.0269222	3321	tags=41%, list=8%, signal=38%	ENSG00000109819/ENSG00000121853/ENSG00000157404/ENSG00000137710/ENSG00000125686/ENSG00000001084/ENSG00000023909
GO:0018279	GO:0018279	protein N-linked glycosylation via asparagine	23	0.552398	1.88856	0.00188479	0.0324905	0.0270731	7728	tags=57%, list=20%, signal=46%	ENSG00000167080/ENSG00000163527/ENSG00000134910/ENSG00000159063/ENSG00000102158/ENSG00000118705/ENSG00000073849/ENSG00000136731/ENSG00000120697/ENSG00000198856/ENSG00000163902/ENSG00000244038/ENSG00000198833
GO:0046651	GO:0046651	lymphocyte proliferation	272	-0.415553	-1.33375	0.00190542	0.0327435	0.0272839	10631	tags=37%, list=27%, signal=27%	ENSG00000105851/ENSG00000206503/ENSG00000123338/ENSG00000205220/ENSG00000121807/ENSG00000136244/ENSG00000196839/ENSG00000010810/ENSG00000147437/ENSG00000169508/ENSG00000090776/ENSG00000134215/ENSG00000049768/ENSG00000158473/ENSG00000242574/ENSG00000134242/ENSG00000006128/ENSG00000138795/ENSG00000115457/ENSG00000143184/ENSG00000196126/ENSG00000111679/ENSG00000065675/ENSG00000017427/ENSG00000115008…
GO:0071545	GO:0071545	inositol phosphate catabolic process	19	0.573644	1.89064	0.00193397	0.0330576	0.0275456	5456	tags=53%, list=14%, signal=45%	ENSG00000101188/ENSG00000104331/ENSG00000122126/ENSG00000133731/ENSG00000141401/ENSG00000159082/ENSG00000087053/ENSG00000078269/ENSG00000162813/ENSG00000068383
GO:0006862	GO:0006862	nucleotide transport	37	0.448151	1.77082	0.00194359	0.0330576	0.0275456	7180	tags=41%, list=18%, signal=33%	ENSG00000169562/ENSG00000121270/ENSG00000185933/ENSG00000112759/ENSG00000125257/ENSG00000183128/ENSG00000005022/ENSG00000171017/ENSG00000171612/ENSG00000091262/ENSG00000124786/ENSG00000101986/ENSG00000157593/ENSG00000169359/ENSG00000100372
GO:0040001	GO:0040001	establishment of mitotic spindle localization	35	0.462568	1.77183	0.00194702	0.0330576	0.0275456	10833	tags=54%, list=27%, signal=39%	ENSG00000153930/ENSG00000086827/ENSG00000164109/ENSG00000215114/ENSG00000150093/ENSG00000007372/ENSG00000072803/ENSG00000040275/ENSG00000007168/ENSG00000186193/ENSG00000121957/ENSG00000166851/ENSG00000135476/ENSG00000108424/ENSG00000080986/ENSG00000163539/ENSG00000146425/ENSG00000197386/ENSG00000136861
GO:0098900	GO:0098900	regulation of action potential	50	0.385339	1.62834	0.00194775	0.0330576	0.0275456	4879	tags=30%, list=12%, signal=26%	ENSG00000134640/ENSG00000160716/ENSG00000198626/ENSG00000138622/ENSG00000101188/ENSG00000114279/ENSG00000118160/ENSG00000154639/ENSG00000174437/ENSG00000134755/ENSG00000096696/ENSG00000057294/ENSG00000177628/ENSG00000075711/ENSG00000129682
GO:0060148	GO:0060148	positive regulation of posttranscriptional gene silencing	31	0.458882	1.75434	0.00196762	0.0332922	0.0277411	6661	tags=35%, list=17%, signal=30%	ENSG00000131914/ENSG00000134323/ENSG00000169032/ENSG00000123908/ENSG00000125378/ENSG00000110367/ENSG00000124571/ENSG00000146648/ENSG00000135829/ENSG00000206557/ENSG00000114867
GO:0033574	GO:0033574	response to testosterone	41	0.423825	1.69951	0.00197628	0.0333361	0.0277777	7840	tags=51%, list=20%, signal=41%	ENSG00000130427/ENSG00000128714/ENSG00000159184/ENSG00000107159/ENSG00000145545/ENSG00000081760/ENSG00000181019/ENSG00000134318/ENSG00000078401/ENSG00000105220/ENSG00000118785/ENSG00000177628/ENSG00000169083/ENSG00000146733/ENSG00000198523/ENSG00000099810/ENSG00000110395/ENSG00000137801/ENSG00000096717/ENSG00000266412/ENSG00000135446
GO:0008209	GO:0008209	androgen metabolic process	29	0.502199	1.87074	0.00201244	0.0338422	0.0281994	5047	tags=41%, list=13%, signal=36%	ENSG00000164690/ENSG00000171234/ENSG00000109819/ENSG00000145545/ENSG00000122787/ENSG00000128039/ENSG00000125686/ENSG00000148926/ENSG00000118785/ENSG00000137869/ENSG00000107679/ENSG00000025423
GO:0042136	GO:0042136	neurotransmitter biosynthetic process	17	0.617692	1.956	0.00202303	0.0339166	0.0282614	925	tags=29%, list=2%, signal=29%	ENSG00000180176/ENSG00000142319/ENSG00000115665/ENSG00000128683/ENSG00000136750
GO:0042417	GO:0042417	dopamine metabolic process	38	0.438865	1.75421	0.0020621	0.0344391	0.0286968	265	tags=13%, list=1%, signal=13%	ENSG00000180176/ENSG00000142319/ENSG00000132437/ENSG00000160716/ENSG00000074317
GO:0009063	GO:0009063	cellular amino acid catabolic process	110	0.311937	1.51672	0.00206672	0.0344391	0.0286968	4798	tags=30%, list=12%, signal=26%	ENSG00000172482/ENSG00000117009/ENSG00000128683/ENSG00000103316/ENSG00000136750/ENSG00000100033/ENSG00000115919/ENSG00000113924/ENSG00000166123/ENSG00000162174/ENSG00000151790/ENSG00000198650/ENSG00000160200/ENSG00000078070/ENSG00000132541/ENSG00000075239/ENSG00000128059/ENSG00000103876/ENSG00000159423/ENSG00000182199/ENSG00000120053/ENSG00000183077/ENSG00000188266/ENSG00000106049/ENSG00000065154…
GO:0046632	GO:0046632	alpha-beta T cell differentiation	111	-0.473266	-1.47496	0.00208254	0.0345978	0.0288291	10498	tags=39%, list=27%, signal=29%	ENSG00000163874/ENSG00000123338/ENSG00000136244/ENSG00000196839/ENSG00000169508/ENSG00000204287/ENSG00000049768/ENSG00000167604/ENSG00000020633/ENSG00000156127/ENSG00000138795/ENSG00000104856/ENSG00000196126/ENSG00000136630/ENSG00000125347/ENSG00000150782/ENSG00000110944/ENSG00000127152/ENSG00000113302/ENSG00000197471/ENSG00000185338/ENSG00000096996/ENSG00000122122/ENSG00000113263/ENSG00000105639…
GO:0007589	GO:0007589	body fluid secretion	88	0.32786	1.52093	0.00211294	0.0349971	0.0291617	6740	tags=33%, list=17%, signal=27%	ENSG00000135413/ENSG00000142319/ENSG00000170835/ENSG00000113389/ENSG00000082556/ENSG00000168539/ENSG00000133019/ENSG00000161798/ENSG00000125686/ENSG00000175591/ENSG00000100644/ENSG00000112759/ENSG00000128059/ENSG00000158669/ENSG00000078401/ENSG00000168447/ENSG00000122218/ENSG00000125166/ENSG00000182718/ENSG00000111335/ENSG00000112715/ENSG00000111424/ENSG00000113494/ENSG00000146648/ENSG00000106541…
GO:0035883	GO:0035883	enteroendocrine cell differentiation	31	0.4564	1.74485	0.00215522	0.0355902	0.029656	6194	tags=42%, list=16%, signal=35%	ENSG00000173404/ENSG00000139515/ENSG00000162992/ENSG00000125820/ENSG00000007372/ENSG00000134852/ENSG00000170558/ENSG00000082701/ENSG00000153162/ENSG00000125378/ENSG00000106615/ENSG00000140992/ENSG00000141448
GO:0021575	GO:0021575	hindbrain morphogenesis	42	0.421821	1.71873	0.00217383	0.0357902	0.0298226	5607	tags=33%, list=14%, signal=29%	ENSG00000089116/ENSG00000171798/ENSG00000273706/ENSG00000135472/ENSG00000102924/ENSG00000118193/ENSG00000169032/ENSG00000179295/ENSG00000138311/ENSG00000152208/ENSG00000177628/ENSG00000135049/ENSG00000105887/ENSG00000044574
GO:0031343	GO:0031343	positive regulation of cell killing	62	-0.531893	-1.57652	0.00220032	0.0360219	0.0300157	10520	tags=53%, list=27%, signal=39%	ENSG00000206503/ENSG00000150637/ENSG00000204287/ENSG00000158473/ENSG00000117281/ENSG00000234745/ENSG00000143184/ENSG00000066336/ENSG00000073754/ENSG00000196126/ENSG00000204632/ENSG00000110944/ENSG00000081237/ENSG00000205809/ENSG00000113302/ENSG00000213809/ENSG00000204642/ENSG00000115607/ENSG00000096996/ENSG00000109943/ENSG00000089692/ENSG00000180644/ENSG00000158488/ENSG00000158481/ENSG00000158485…
GO:0034116	GO:0034116	positive regulation of heterotypic cell-cell adhesion	16	0.62985	1.95009	0.00220756	0.0360219	0.0300157	609	tags=25%, list=2%, signal=25%	ENSG00000171557/ENSG00000086548/ENSG00000171564/ENSG00000161905
GO:1904874	GO:1904874	positive regulation of telomerase RNA localization to Cajal body	15	0.673771	2.03947	0.00220756	0.0360219	0.0300157	11415	tags=93%, list=29%, signal=66%	ENSG00000120438/ENSG00000150753/ENSG00000156261/ENSG00000115484/ENSG00000166226/ENSG00000146731/ENSG00000145414/ENSG00000163468/ENSG00000130826/ENSG00000182117/ENSG00000175792/ENSG00000135624/ENSG00000145912/ENSG00000144736
GO:0042401	GO:0042401	cellular biogenic amine biosynthetic process	35	0.456582	1.7489	0.0022337	0.0363405	0.0302812	1766	tags=17%, list=4%, signal=16%	ENSG00000180176/ENSG00000142319/ENSG00000132437/ENSG00000173404/ENSG00000155096/ENSG00000123505
GO:0030901	GO:0030901	midbrain development	89	0.32163	1.51996	0.00225899	0.0366436	0.0305337	7189	tags=31%, list=18%, signal=26%	ENSG00000164690/ENSG00000154342/ENSG00000164778/ENSG00000163064/ENSG00000114450/ENSG00000164930/ENSG00000117115/ENSG00000160211/ENSG00000116750/ENSG00000234289/ENSG00000143933/ENSG00000006459/ENSG00000104290/ENSG00000157240/ENSG00000148396/ENSG00000113456/ENSG00000070614/ENSG00000148798/ENSG00000044574/ENSG00000170365/ENSG00000198668/ENSG00000134308/ENSG00000148672/ENSG00000163848/ENSG00000070018…
GO:0046174	GO:0046174	polyol catabolic process	26	0.532508	1.90506	0.00233033	0.0375653	0.0313017	5456	tags=46%, list=14%, signal=40%	ENSG00000101188/ENSG00000104331/ENSG00000140263/ENSG00000122126/ENSG00000133731/ENSG00000141401/ENSG00000159082/ENSG00000115159/ENSG00000087053/ENSG00000078269/ENSG00000162813/ENSG00000068383
GO:0046189	GO:0046189	phenol-containing compound biosynthetic process	44	0.419621	1.7319	0.00234136	0.0375653	0.0313017	6788	tags=39%, list=17%, signal=32%	ENSG00000180176/ENSG00000142319/ENSG00000132437/ENSG00000173404/ENSG00000107165/ENSG00000054277/ENSG00000203668/ENSG00000104044/ENSG00000151012/ENSG00000131979/ENSG00000062038/ENSG00000092969/ENSG00000139287/ENSG00000185664/ENSG00000164175/ENSG00000165240/ENSG00000077498
GO:0072539	GO:0072539	T-helper 17 cell differentiation	28	-0.614953	-1.64426	0.00234375	0.0375653	0.0313017	10498	tags=54%, list=27%, signal=39%	ENSG00000163874/ENSG00000136244/ENSG00000049768/ENSG00000167604/ENSG00000156127/ENSG00000110944/ENSG00000113302/ENSG00000096996/ENSG00000113520/ENSG00000137265/ENSG00000073861/ENSG00000109471/ENSG00000144802/ENSG00000162739/ENSG00000122224
GO:0000460	GO:0000460	maturation of 5.8S rRNA	35	0.455135	1.74336	0.00235315	0.0375653	0.0313017	8104	tags=37%, list=20%, signal=30%	ENSG00000135698/ENSG00000253729/ENSG00000124787/ENSG00000142207/ENSG00000039123/ENSG00000067533/ENSG00000120800/ENSG00000196943/ENSG00000196678/ENSG00000087269/ENSG00000104626/ENSG00000197223/ENSG00000138442
GO:0032006	GO:0032006	regulation of TOR signaling	102	0.310288	1.5104	0.00235653	0.0375653	0.0313017	7597	tags=30%, list=19%, signal=25%	ENSG00000131914/ENSG00000169330/ENSG00000130147/ENSG00000100644/ENSG00000101447/ENSG00000077585/ENSG00000084073/ENSG00000025039/ENSG00000113384/ENSG00000132356/ENSG00000117020/ENSG00000174206/ENSG00000176641/ENSG00000159459/ENSG00000207752/ENSG00000177628/ENSG00000189056/ENSG00000133706/ENSG00000217128/ENSG00000106615/ENSG00000085415/ENSG00000121879/ENSG00000138678/ENSG00000112146/ENSG00000112425…
GO:0045058	GO:0045058	T cell selection	50	-0.543784	-1.57594	0.0023568	0.0375653	0.0313017	10727	tags=54%, list=27%, signal=39%	ENSG00000118046/ENSG00000010610/ENSG00000136244/ENSG00000049768/ENSG00000158473/ENSG00000156127/ENSG00000178562/ENSG00000019582/ENSG00000110944/ENSG00000081237/ENSG00000127152/ENSG00000172673/ENSG00000113302/ENSG00000197471/ENSG00000160654/ENSG00000096996/ENSG00000198846/ENSG00000137265/ENSG00000073861/ENSG00000160224/ENSG00000198286/ENSG00000162739/ENSG00000122224/ENSG00000198851/ENSG00000126353…
GO:0009072	GO:0009072	aromatic amino acid family metabolic process	30	0.489408	1.85898	0.00241605	0.0383985	0.031996	3289	tags=33%, list=8%, signal=31%	ENSG00000009765/ENSG00000180176/ENSG00000117009/ENSG00000115919/ENSG00000186603/ENSG00000113924/ENSG00000151790/ENSG00000198650/ENSG00000103876/ENSG00000183077
GO:0009308	GO:0009308	amine metabolic process	113	0.304604	1.54426	0.00245799	0.0389524	0.0324576	2423	tags=15%, list=6%, signal=14%	ENSG00000180176/ENSG00000142319/ENSG00000132437/ENSG00000023839/ENSG00000160716/ENSG00000074317/ENSG00000117009/ENSG00000173404/ENSG00000115919/ENSG00000102886/ENSG00000155096/ENSG00000123505/ENSG00000151790/ENSG00000197165/ENSG00000002726/ENSG00000198203/ENSG00000138744
GO:0070542	GO:0070542	response to fatty acid	61	0.36561	1.59638	0.00248233	0.039225	0.0326847	4912	tags=25%, list=12%, signal=22%	ENSG00000109424/ENSG00000139515/ENSG00000099194/ENSG00000109819/ENSG00000163347/ENSG00000151726/ENSG00000081760/ENSG00000130707/ENSG00000151632/ENSG00000110090/ENSG00000121769/ENSG00000130164/ENSG00000078401/ENSG00000134057/ENSG00000125629
GO:0097066	GO:0097066	response to thyroid hormone	26	0.530681	1.89852	0.0024956	0.0393218	0.0327653	6287	tags=50%, list=16%, signal=42%	ENSG00000109819/ENSG00000121853/ENSG00000157404/ENSG00000131183/ENSG00000137710/ENSG00000125686/ENSG00000001084/ENSG00000023909/ENSG00000170615/ENSG00000177628/ENSG00000182718/ENSG00000119138/ENSG00000135932
GO:0001832	GO:0001832	blastocyst growth	20	0.550602	1.84764	0.00252008	0.039594	0.0329922	6249	tags=50%, list=16%, signal=42%	ENSG00000149554/ENSG00000126524/ENSG00000152684/ENSG00000104320/ENSG00000147536/ENSG00000139618/ENSG00000101003/ENSG00000166200/ENSG00000146918/ENSG00000109917
GO:0044088	GO:0044088	regulation of vacuole organization	44	0.417586	1.7235	0.00254245	0.0398318	0.0331903	12060	tags=57%, list=30%, signal=40%	ENSG00000104341/ENSG00000138760/ENSG00000171100/ENSG00000118873/ENSG00000144566/ENSG00000166908/ENSG00000106460/ENSG00000182718/ENSG00000132405/ENSG00000176046/ENSG00000092108/ENSG00000115839/ENSG00000188021/ENSG00000144118/ENSG00000265808/ENSG00000108239/ENSG00000149557/ENSG00000126581/ENSG00000097033/ENSG00000176142/ENSG00000109083/ENSG00000188906/ENSG00000115020/ENSG00000116299/ENSG00000158828
GO:0070741	GO:0070741	response to interleukin-6	43	0.411067	1.68938	0.00255322	0.0398706	0.0332226	1260	tags=14%, list=3%, signal=14%	ENSG00000171557/ENSG00000125798/ENSG00000023839/ENSG00000207638/ENSG00000109819/ENSG00000164047
GO:0090161	GO:0090161	Golgi ribbon formation	13	0.68668	2.012	0.00256289	0.0398706	0.0332226	10754	tags=77%, list=27%, signal=56%	ENSG00000113384/ENSG00000117500/ENSG00000196535/ENSG00000117533/ENSG00000100462/ENSG00000135823/ENSG00000100815/ENSG00000135968/ENSG00000151532/ENSG00000167110
GO:0006857	GO:0006857	oligopeptide transport	16	0.625527	1.9367	0.00257393	0.0398706	0.0332226	3676	tags=38%, list=9%, signal=34%	ENSG00000088386/ENSG00000158296/ENSG00000008394/ENSG00000125257/ENSG00000163406/ENSG00000151012
GO:0071371	GO:0071371	cellular response to gonadotropin stimulus	16	0.624925	1.93484	0.00257393	0.0398706	0.0332226	6194	tags=69%, list=16%, signal=58%	ENSG00000109819/ENSG00000112972/ENSG00000184937/ENSG00000148400/ENSG00000001084/ENSG00000145386/ENSG00000023909/ENSG00000105641/ENSG00000122641/ENSG00000070886/ENSG00000141448
GO:0015721	GO:0015721	bile acid and bile salt transport	28	0.489143	1.7973	0.00260918	0.040303	0.0335829	4332	tags=32%, list=11%, signal=29%	ENSG00000023839/ENSG00000257046/ENSG00000121270/ENSG00000145283/ENSG00000125257/ENSG00000134538/ENSG00000103569/ENSG00000132356/ENSG00000120519
GO:0022406	GO:0022406	membrane docking	87	0.32367	1.48433	0.00262756	0.0404732	0.0337248	10207	tags=46%, list=26%, signal=34%	ENSG00000145920/ENSG00000169213/ENSG00000175318/ENSG00000178750/ENSG00000105514/ENSG00000174437/ENSG00000073969/ENSG00000177380/ENSG00000138768/ENSG00000158220/ENSG00000187446/ENSG00000166900/ENSG00000184178/ENSG00000137501/ENSG00000117868/ENSG00000130477/ENSG00000124164/ENSG00000198668/ENSG00000084733/ENSG00000117758/ENSG00000165650/ENSG00000075785/ENSG00000135823/ENSG00000198722/ENSG00000106636…
GO:0000132	GO:0000132	establishment of mitotic spindle orientation	30	0.48456	1.84056	0.00268664	0.0409949	0.0341595	10833	tags=53%, list=27%, signal=39%	ENSG00000153930/ENSG00000086827/ENSG00000164109/ENSG00000215114/ENSG00000150093/ENSG00000007372/ENSG00000072803/ENSG00000040275/ENSG00000007168/ENSG00000186193/ENSG00000121957/ENSG00000166851/ENSG00000080986/ENSG00000146425/ENSG00000197386/ENSG00000136861
GO:0055075	GO:0055075	potassium ion homeostasis	30	0.48478	1.8414	0.00268664	0.0409949	0.0341595	6244	tags=43%, list=16%, signal=37%	ENSG00000074803/ENSG00000008196/ENSG00000055118/ENSG00000105409/ENSG00000186009/ENSG00000163399/ENSG00000221955/ENSG00000064651/ENSG00000168447/ENSG00000070915/ENSG00000143153/ENSG00000132681/ENSG00000069849
GO:0002183	GO:0002183	cytoplasmic translational initiation	34	0.458559	1.78783	0.00268957	0.0409949	0.0341595	9832	tags=56%, list=25%, signal=42%	ENSG00000147677/ENSG00000104408/ENSG00000104131/ENSG00000205609/ENSG00000067248/ENSG00000125977/ENSG00000184110/ENSG00000139726/ENSG00000180574/ENSG00000100129/ENSG00000100664/ENSG00000114867/ENSG00000130741/ENSG00000070785/ENSG00000232119/ENSG00000198492/ENSG00000198793/ENSG00000106682/ENSG00000107581
GO:0050000	GO:0050000	chromosome localization	81	0.334725	1.52307	0.00269125	0.0409949	0.0341595	10779	tags=57%, list=27%, signal=41%	ENSG00000167014/ENSG00000168070/ENSG00000118193/ENSG00000155816/ENSG00000101447/ENSG00000086827/ENSG00000143228/ENSG00000103769/ENSG00000164695/ENSG00000176623/ENSG00000138778/ENSG00000198824/ENSG00000083937/ENSG00000117724/ENSG00000138071/ENSG00000134057/ENSG00000161609/ENSG00000031691/ENSG00000147601/ENSG00000094880/ENSG00000036257/ENSG00000121621/ENSG00000126787/ENSG00000119048/ENSG00000085415…
GO:0002287	GO:0002287	alpha-beta T cell activation involved in immune response	68	-0.514671	-1.54082	0.00274976	0.0414372	0.034528	11550	tags=44%, list=29%, signal=31%	ENSG00000168961/ENSG00000115604/ENSG00000163874/ENSG00000136244/ENSG00000169508/ENSG00000204287/ENSG00000049768/ENSG00000167604/ENSG00000156127/ENSG00000138795/ENSG00000104856/ENSG00000196126/ENSG00000136630/ENSG00000150782/ENSG00000110944/ENSG00000113302/ENSG00000197471/ENSG00000096996/ENSG00000105639/ENSG00000113520/ENSG00000137265/ENSG00000073861/ENSG00000163508/ENSG00000109471/ENSG00000144802…
GO:0002293	GO:0002293	alpha-beta T cell differentiation involved in immune response	68	-0.514671	-1.54082	0.00274976	0.0414372	0.034528	11550	tags=44%, list=29%, signal=31%	ENSG00000168961/ENSG00000115604/ENSG00000163874/ENSG00000136244/ENSG00000169508/ENSG00000204287/ENSG00000049768/ENSG00000167604/ENSG00000156127/ENSG00000138795/ENSG00000104856/ENSG00000196126/ENSG00000136630/ENSG00000150782/ENSG00000110944/ENSG00000113302/ENSG00000197471/ENSG00000096996/ENSG00000105639/ENSG00000113520/ENSG00000137265/ENSG00000073861/ENSG00000163508/ENSG00000109471/ENSG00000144802…
GO:0034637	GO:0034637	cellular carbohydrate biosynthetic process	74	0.341591	1.4902	0.00275013	0.0414372	0.034528	7893	tags=39%, list=20%, signal=31%	ENSG00000115592/ENSG00000167531/ENSG00000179913/ENSG00000138653/ENSG00000170340/ENSG00000120053/ENSG00000162688/ENSG00000132825/ENSG00000110958/ENSG00000169764/ENSG00000133731/ENSG00000141401/ENSG00000182197/ENSG00000070614/ENSG00000117054/ENSG00000169826/ENSG00000213639/ENSG00000082701/ENSG00000176383/ENSG00000114480/ENSG00000156966/ENSG00000100889/ENSG00000131871/ENSG00000158470/ENSG00000197594…
GO:1904380	GO:1904380	endoplasmic reticulum mannose trimming	14	0.642862	1.87504	0.00275042	0.0414372	0.034528	10678	tags=64%, list=27%, signal=47%	ENSG00000170881/ENSG00000116406/ENSG00000136731/ENSG00000145495/ENSG00000239305/ENSG00000134109/ENSG00000159461/ENSG00000102595/ENSG00000162298
GO:1901992	GO:1901992	positive regulation of mitotic cell cycle phase transition	81	0.333439	1.51721	0.00276652	0.0415659	0.0346353	9816	tags=49%, list=25%, signal=37%	ENSG00000172167/ENSG00000137710/ENSG00000182621/ENSG00000156831/ENSG00000103769/ENSG00000138594/ENSG00000112029/ENSG00000143476/ENSG00000134057/ENSG00000142192/ENSG00000094804/ENSG00000094880/ENSG00000170312/ENSG00000004897/ENSG00000185630/ENSG00000036257/ENSG00000126787/ENSG00000215301/ENSG00000146648/ENSG00000101224/ENSG00000119541/ENSG00000139687/ENSG00000114867/ENSG00000169375/ENSG00000132466…
GO:1903313	GO:1903313	positive regulation of mRNA metabolic process	114	0.309683	1.5688	0.00278571	0.041714	0.0347587	11108	tags=50%, list=28%, signal=36%	ENSG00000188613/ENSG00000101489/ENSG00000070756/ENSG00000109971/ENSG00000132541/ENSG00000121274/ENSG00000185728/ENSG00000159409/ENSG00000125107/ENSG00000146453/ENSG00000136937/ENSG00000134318/ENSG00000123908/ENSG00000167005/ENSG00000138035/ENSG00000134371/ENSG00000166477/ENSG00000134057/ENSG00000141232/ENSG00000188816/ENSG00000107864/ENSG00000105939/ENSG00000113300/ENSG00000175324/ENSG00000174840…
GO:2000060	GO:2000060	positive regulation of ubiquitin-dependent protein catabolic process	105	0.306532	1.49513	0.00279155	0.041714	0.0347587	8115	tags=35%, list=20%, signal=28%	ENSG00000138798/ENSG00000170881/ENSG00000137393/ENSG00000119283/ENSG00000169398/ENSG00000101255/ENSG00000169139/ENSG00000167196/ENSG00000001084/ENSG00000164287/ENSG00000166233/ENSG00000185345/ENSG00000113712/ENSG00000050748/ENSG00000177628/ENSG00000034677/ENSG00000163743/ENSG00000135018/ENSG00000162946/ENSG00000013561/ENSG00000082701/ENSG00000135049/ENSG00000180008/ENSG00000101843/ENSG00000051108…
GO:0071398	GO:0071398	cellular response to fatty acid	35	0.44527	1.70557	0.00280893	0.0418599	0.0348803	4413	tags=26%, list=11%, signal=23%	ENSG00000109424/ENSG00000109819/ENSG00000163347/ENSG00000130707/ENSG00000151632/ENSG00000110090/ENSG00000130164/ENSG00000078401/ENSG00000134057
GO:0031929	GO:0031929	TOR signaling	124	0.293779	1.45808	0.00283467	0.0420886	0.0350708	8244	tags=33%, list=21%, signal=26%	ENSG00000131914/ENSG00000169330/ENSG00000130147/ENSG00000187840/ENSG00000100644/ENSG00000101447/ENSG00000077585/ENSG00000084073/ENSG00000140950/ENSG00000169895/ENSG00000025039/ENSG00000113384/ENSG00000132356/ENSG00000117020/ENSG00000143155/ENSG00000174206/ENSG00000176641/ENSG00000159459/ENSG00000207752/ENSG00000177628/ENSG00000189056/ENSG00000162946/ENSG00000133706/ENSG00000217128/ENSG00000106615…
GO:0010833	GO:0010833	telomere maintenance via telomere lengthening	78	0.328032	1.46843	0.00283958	0.0420886	0.0350708	12224	tags=65%, list=31%, signal=45%	ENSG00000121274/ENSG00000120438/ENSG00000117650/ENSG00000180532/ENSG00000151414/ENSG00000150753/ENSG00000110958/ENSG00000051180/ENSG00000156261/ENSG00000020922/ENSG00000096384/ENSG00000115484/ENSG00000166226/ENSG00000143799/ENSG00000080824/ENSG00000147601/ENSG00000175595/ENSG00000100030/ENSG00000175054/ENSG00000146731/ENSG00000145414/ENSG00000107854/ENSG00000174953/ENSG00000163468/ENSG00000132383…
GO:0051084	GO:0051084	'de novo' posttranslational protein folding	36	0.44714	1.74743	0.00287974	0.0424287	0.0353542	9076	tags=53%, list=23%, signal=41%	ENSG00000109971/ENSG00000197930/ENSG00000120694/ENSG00000113013/ENSG00000163528/ENSG00000110958/ENSG00000136731/ENSG00000166226/ENSG00000173110/ENSG00000044574/ENSG00000187522/ENSG00000164031/ENSG00000155304/ENSG00000136816/ENSG00000100380/ENSG00000132002/ENSG00000162616/ENSG00000204388/ENSG00000183291
GO:0021794	GO:0021794	thalamus development	13	0.684342	2.00515	0.00289627	0.0424287	0.0353542	1778	tags=46%, list=4%, signal=44%	ENSG00000205927/ENSG00000164690/ENSG00000160716/ENSG00000168505/ENSG00000145545/ENSG00000174469
GO:0001824	GO:0001824	blastocyst development	105	0.305394	1.48958	0.00289689	0.0424287	0.0353542	7347	tags=33%, list=19%, signal=27%	ENSG00000113196/ENSG00000162040/ENSG00000185467/ENSG00000106799/ENSG00000136603/ENSG00000171848/ENSG00000149554/ENSG00000117650/ENSG00000125107/ENSG00000146453/ENSG00000126524/ENSG00000152684/ENSG00000104320/ENSG00000162909/ENSG00000147536/ENSG00000136518/ENSG00000137693/ENSG00000139618/ENSG00000101773/ENSG00000101003/ENSG00000166200/ENSG00000077721/ENSG00000115310/ENSG00000143452/ENSG00000151962…
GO:0030970	GO:0030970	retrograde protein transport, ER to cytosol	28	0.485112	1.78249	0.00290111	0.0424287	0.0353542	11513	tags=64%, list=29%, signal=46%	ENSG00000136986/ENSG00000180667/ENSG00000068912/ENSG00000166598/ENSG00000113194/ENSG00000051108/ENSG00000131871/ENSG00000165280/ENSG00000198833/ENSG00000134109/ENSG00000174672/ENSG00000101294/ENSG00000071537/ENSG00000072849/ENSG00000135506/ENSG00000162298/ENSG00000185825/ENSG00000144468
GO:1903513	GO:1903513	endoplasmic reticulum to cytosol transport	28	0.485112	1.78249	0.00290111	0.0424287	0.0353542	11513	tags=64%, list=29%, signal=46%	ENSG00000136986/ENSG00000180667/ENSG00000068912/ENSG00000166598/ENSG00000113194/ENSG00000051108/ENSG00000131871/ENSG00000165280/ENSG00000198833/ENSG00000134109/ENSG00000174672/ENSG00000101294/ENSG00000071537/ENSG00000072849/ENSG00000135506/ENSG00000162298/ENSG00000185825/ENSG00000144468
GO:0072524	GO:0072524	pyridine-containing compound metabolic process	38	0.430421	1.72046	0.00296743	0.0431212	0.0359312	3504	tags=29%, list=9%, signal=26%	ENSG00000256870/ENSG00000117009/ENSG00000157064/ENSG00000115919/ENSG00000105835/ENSG00000182054/ENSG00000108439/ENSG00000135069/ENSG00000183077/ENSG00000198805/ENSG00000152620
GO:0002501	GO:0002501	peptide antigen assembly with MHC protein complex	16	-0.694328	-1.67511	0.00297646	0.0431212	0.0359312	10019	tags=81%, list=25%, signal=61%	ENSG00000204287/ENSG00000242574/ENSG00000139192/ENSG00000196735/ENSG00000196126/ENSG00000204257/ENSG00000204252/ENSG00000198502/ENSG00000179344/ENSG00000223865/ENSG00000237541/ENSG00000232629/ENSG00000241106
GO:0007632	GO:0007632	visual behavior	49	0.406734	1.72822	0.00297671	0.0431212	0.0359312	6382	tags=37%, list=16%, signal=31%	ENSG00000160716/ENSG00000187094/ENSG00000157404/ENSG00000131771/ENSG00000100644/ENSG00000113161/ENSG00000156642/ENSG00000196639/ENSG00000150093/ENSG00000133703/ENSG00000151012/ENSG00000166342/ENSG00000196712/ENSG00000122375/ENSG00000142192/ENSG00000183454/ENSG00000033800/ENSG00000166349
GO:0031442	GO:0031442	positive regulation of mRNA 3'-end processing	11	0.70576	1.9316	0.00298261	0.0431212	0.0359312	10510	tags=91%, list=27%, signal=67%	ENSG00000136937/ENSG00000167005/ENSG00000134371/ENSG00000166477/ENSG00000134057/ENSG00000107864/ENSG00000174953/ENSG00000214575/ENSG00000114503/ENSG00000185122
GO:0006576	GO:0006576	cellular biogenic amine metabolic process	98	0.310017	1.50066	0.00298767	0.0431212	0.0359312	2423	tags=15%, list=6%, signal=14%	ENSG00000180176/ENSG00000142319/ENSG00000132437/ENSG00000160716/ENSG00000074317/ENSG00000117009/ENSG00000173404/ENSG00000115919/ENSG00000102886/ENSG00000155096/ENSG00000123505/ENSG00000151790/ENSG00000197165/ENSG00000002726/ENSG00000138744
GO:0031915	GO:0031915	positive regulation of synaptic plasticity	10	0.729802	1.93737	0.00299871	0.0431673	0.0359696	1582	tags=30%, list=4%, signal=29%	ENSG00000145920/ENSG00000155897/ENSG00000131711
GO:0019229	GO:0019229	regulation of vasoconstriction	64	0.348797	1.54097	0.00303429	0.0435596	0.0362965	4279	tags=20%, list=11%, signal=18%	ENSG00000171557/ENSG00000134640/ENSG00000171564/ENSG00000197584/ENSG00000133019/ENSG00000198049/ENSG00000113161/ENSG00000127129/ENSG00000196639/ENSG00000148926/ENSG00000168398/ENSG00000078401/ENSG00000171560
GO:0045839	GO:0045839	negative regulation of mitotic nuclear division	48	0.388293	1.63677	0.0030418	0.0435596	0.0362965	10061	tags=56%, list=25%, signal=42%	ENSG00000164754/ENSG00000172167/ENSG00000121101/ENSG00000086827/ENSG00000149554/ENSG00000174442/ENSG00000164109/ENSG00000156970/ENSG00000112029/ENSG00000117724/ENSG00000134057/ENSG00000169679/ENSG00000125378/ENSG00000112742/ENSG00000134982/ENSG00000040275/ENSG00000071539/ENSG00000166851/ENSG00000122952/ENSG00000124688/ENSG00000178295/ENSG00000080986/ENSG00000047410/ENSG00000172113/ENSG00000010244…
GO:0072148	GO:0072148	epithelial cell fate commitment	15	0.660587	1.99956	0.00306419	0.0436567	0.0363775	2125	tags=33%, list=5%, signal=32%	ENSG00000162992/ENSG00000106031/ENSG00000125820/ENSG00000104413/ENSG00000148400
GO:0010002	GO:0010002	cardioblast differentiation	18	0.576843	1.87837	0.00306447	0.0436567	0.0363775	7598	tags=44%, list=19%, signal=36%	ENSG00000154342/ENSG00000166923/ENSG00000148400/ENSG00000136574/ENSG00000092969/ENSG00000141448/ENSG00000084093/ENSG00000174953
GO:0006301	GO:0006301	postreplication repair	31	0.443225	1.69449	0.00307587	0.043706	0.0364185	9274	tags=65%, list=23%, signal=49%	ENSG00000169139/ENSG00000010072/ENSG00000012048/ENSG00000095002/ENSG00000143476/ENSG00000163743/ENSG00000166803/ENSG00000077721/ENSG00000177889/ENSG00000103194/ENSG00000009413/ENSG00000119048/ENSG00000132646/ENSG00000165280/ENSG00000070950/ENSG00000100479/ENSG00000154914/ENSG00000122008/ENSG00000170734/ENSG00000004142
GO:0010998	GO:0010998	regulation of translational initiation by eIF2 alpha phosphorylation	10	0.728247	1.93325	0.00311331	0.0440113	0.0366729	7460	tags=80%, list=19%, signal=65%	ENSG00000102580/ENSG00000086598/ENSG00000172071/ENSG00000158615/ENSG00000128829/ENSG00000181163/ENSG00000086232/ENSG00000055332
GO:0000271	GO:0000271	polysaccharide biosynthetic process	68	0.367233	1.63418	0.00311336	0.0440113	0.0366729	7266	tags=37%, list=18%, signal=30%	ENSG00000115592/ENSG00000179913/ENSG00000138798/ENSG00000138653/ENSG00000141367/ENSG00000170340/ENSG00000162688/ENSG00000132825/ENSG00000110958/ENSG00000169764/ENSG00000182197/ENSG00000070614/ENSG00000117054/ENSG00000169826/ENSG00000213639/ENSG00000082701/ENSG00000103056/ENSG00000176383/ENSG00000114480/ENSG00000156966/ENSG00000131871/ENSG00000158470/ENSG00000197594/ENSG00000163754/ENSG00000153936
GO:0021702	GO:0021702	cerebellar Purkinje cell differentiation	11	0.703175	1.92453	0.00318279	0.0448773	0.0373945	283	tags=27%, list=1%, signal=27%	ENSG00000089116/ENSG00000273706/ENSG00000135472
GO:0030301	GO:0030301	cholesterol transport	101	0.305593	1.48799	0.00323077	0.0454374	0.0378612	7367	tags=36%, list=19%, signal=29%	ENSG00000110243/ENSG00000164690/ENSG00000170835/ENSG00000179869/ENSG00000144452/ENSG00000138798/ENSG00000131748/ENSG00000180432/ENSG00000175535/ENSG00000111684/ENSG00000015520/ENSG00000155158/ENSG00000057252/ENSG00000130164/ENSG00000143921/ENSG00000153989/ENSG00000141458/ENSG00000110048/ENSG00000198911/ENSG00000116171/ENSG00000182718/ENSG00000038945/ENSG00000122335/ENSG00000185920/ENSG00000182704…
GO:0003401	GO:0003401	axis elongation	27	0.481336	1.75387	0.00325584	0.0454826	0.0378989	7304	tags=41%, list=18%, signal=33%	ENSG00000164690/ENSG00000154342/ENSG00000128714/ENSG00000121039/ENSG00000125686/ENSG00000137693/ENSG00000140807/ENSG00000125378/ENSG00000126778/ENSG00000066468/ENSG00000112655
GO:0006625	GO:0006625	protein targeting to peroxisome	18	0.575094	1.87267	0.00326707	0.0454826	0.0378989	5079	tags=44%, list=13%, signal=39%	ENSG00000114757/ENSG00000034693/ENSG00000102910/ENSG00000086666/ENSG00000162928/ENSG00000127980/ENSG00000164751/ENSG00000112357
GO:0072662	GO:0072662	protein localization to peroxisome	18	0.575094	1.87267	0.00326707	0.0454826	0.0378989	5079	tags=44%, list=13%, signal=39%	ENSG00000114757/ENSG00000034693/ENSG00000102910/ENSG00000086666/ENSG00000162928/ENSG00000127980/ENSG00000164751/ENSG00000112357
GO:0072663	GO:0072663	establishment of protein localization to peroxisome	18	0.575094	1.87267	0.00326707	0.0454826	0.0378989	5079	tags=44%, list=13%, signal=39%	ENSG00000114757/ENSG00000034693/ENSG00000102910/ENSG00000086666/ENSG00000162928/ENSG00000127980/ENSG00000164751/ENSG00000112357
GO:0055002	GO:0055002	striated muscle cell development	63	0.363683	1.61806	0.00331531	0.0460203	0.0383469	4081	tags=22%, list=10%, signal=20%	ENSG00000077522/ENSG00000166317/ENSG00000138347/ENSG00000140795/ENSG00000197893/ENSG00000143632/ENSG00000036448/ENSG00000115884/ENSG00000129170/ENSG00000172399/ENSG00000138594/ENSG00000150093/ENSG00000128872/ENSG00000078401
GO:0045921	GO:0045921	positive regulation of exocytosis	86	0.330278	1.51435	0.00332243	0.0460203	0.0383469	6735	tags=33%, list=17%, signal=27%	ENSG00000171557/ENSG00000171564/ENSG00000132872/ENSG00000204936/ENSG00000171450/ENSG00000164251/ENSG00000115884/ENSG00000110723/ENSG00000105514/ENSG00000100078/ENSG00000033327/ENSG00000166747/ENSG00000164506/ENSG00000124333/ENSG00000144566/ENSG00000170248/ENSG00000100346/ENSG00000171560/ENSG00000136738/ENSG00000087470/ENSG00000103056/ENSG00000107130/ENSG00000041353/ENSG00000114520/ENSG00000119541…
GO:0021781	GO:0021781	glial cell fate commitment	12	0.705822	1.99315	0.00334339	0.0461942	0.0384918	3691	tags=42%, list=9%, signal=38%	ENSG00000205927/ENSG00000125820/ENSG00000139352/ENSG00000137270/ENSG00000007372
GO:0010635	GO:0010635	regulation of mitochondrial fusion	13	0.679304	1.99039	0.00339634	0.0466931	0.0389075	4581	tags=38%, list=12%, signal=34%	ENSG00000072274/ENSG00000176171/ENSG00000198836/ENSG00000185345/ENSG00000087470
GO:0010508	GO:0010508	positive regulation of autophagy	124	0.291357	1.44606	0.00339648	0.0466931	0.0389075	10352	tags=47%, list=26%, signal=35%	ENSG00000135413/ENSG00000172057/ENSG00000147649/ENSG00000130147/ENSG00000152137/ENSG00000176171/ENSG00000100644/ENSG00000213585/ENSG00000167333/ENSG00000051382/ENSG00000118873/ENSG00000164938/ENSG00000136436/ENSG00000100596/ENSG00000078804/ENSG00000198382/ENSG00000132356/ENSG00000005022/ENSG00000185345/ENSG00000166908/ENSG00000153130/ENSG00000176641/ENSG00000014123/ENSG00000082701/ENSG00000168092…
GO:0030641	GO:0030641	regulation of cellular pH	81	0.329678	1.5001	0.00340639	0.0467126	0.0389238	7251	tags=33%, list=18%, signal=27%	ENSG00000115616/ENSG00000105929/ENSG00000179331/ENSG00000137561/ENSG00000178301/ENSG00000169504/ENSG00000168748/ENSG00000131238/ENSG00000110955/ENSG00000187446/ENSG00000106460/ENSG00000128973/ENSG00000134851/ENSG00000047249/ENSG00000179630/ENSG00000132681/ENSG00000100030/ENSG00000182220/ENSG00000166148/ENSG00000123892/ENSG00000198689/ENSG00000114062/ENSG00000109572/ENSG00000075785/ENSG00000090020…
GO:0048168	GO:0048168	regulation of neuronal synaptic plasticity	50	0.372312	1.57329	0.00343817	0.0470311	0.0391892	3754	tags=28%, list=9%, signal=25%	ENSG00000058335/ENSG00000102003/ENSG00000118160/ENSG00000157404/ENSG00000154118/ENSG00000237515/ENSG00000164418/ENSG00000156642/ENSG00000177380/ENSG00000103769/ENSG00000169895/ENSG00000133703/ENSG00000166342/ENSG00000144566
GO:0002920	GO:0002920	regulation of humoral immune response	43	-0.554754	-1.57097	0.00344935	0.047067	0.0392191	8744	tags=42%, list=22%, signal=33%	ENSG00000073754/ENSG00000125730/ENSG00000111679/ENSG00000081237/ENSG00000110169/ENSG00000123838/ENSG00000112115/ENSG00000129654/ENSG00000203710/ENSG00000197721/ENSG00000142515/ENSG00000226979/ENSG00000126353/ENSG00000112116/ENSG00000116996/ENSG00000156234/ENSG00000117322/ENSG00000104921
GO:0006903	GO:0006903	vesicle targeting	45	0.412221	1.6992	0.00349331	0.0475488	0.0396206	10189	tags=62%, list=26%, signal=46%	ENSG00000176853/ENSG00000131748/ENSG00000086598/ENSG00000187446/ENSG00000152700/ENSG00000242247/ENSG00000036054/ENSG00000036257/ENSG00000010270/ENSG00000114354/ENSG00000100815/ENSG00000170348/ENSG00000117153/ENSG00000106636/ENSG00000119414/ENSG00000108666/ENSG00000184840/ENSG00000129354/ENSG00000144036/ENSG00000079332/ENSG00000138660/ENSG00000131558/ENSG00000099940/ENSG00000092531/ENSG00000107862…
GO:0006458	GO:0006458	'de novo' protein folding	40	0.424502	1.68824	0.00352249	0.0478276	0.0398529	10275	tags=57%, list=26%, signal=43%	ENSG00000109971/ENSG00000197930/ENSG00000120694/ENSG00000113013/ENSG00000144381/ENSG00000163528/ENSG00000110958/ENSG00000136731/ENSG00000166226/ENSG00000173110/ENSG00000044574/ENSG00000187522/ENSG00000164031/ENSG00000155304/ENSG00000136816/ENSG00000100380/ENSG00000132002/ENSG00000162616/ENSG00000204388/ENSG00000183291/ENSG00000115541/ENSG00000187726/ENSG00000105821
GO:0031954	GO:0031954	positive regulation of protein autophosphorylation	26	0.517237	1.85043	0.0035543	0.0479391	0.0399458	5876	tags=42%, list=15%, signal=36%	ENSG00000166923/ENSG00000136235/ENSG00000104320/ENSG00000123728/ENSG00000143933/ENSG00000140575/ENSG00000125249/ENSG00000020922/ENSG00000112715/ENSG00000215301/ENSG00000198668
GO:0009226	GO:0009226	nucleotide-sugar biosynthetic process	19	0.548391	1.8074	0.00356535	0.0479391	0.0399458	9227	tags=47%, list=23%, signal=36%	ENSG00000100522/ENSG00000198380/ENSG00000013375/ENSG00000117143/ENSG00000140650/ENSG00000109814/ENSG00000095380/ENSG00000115652/ENSG00000104522
GO:0015865	GO:0015865	purine nucleotide transport	30	0.474285	1.80153	0.00357574	0.0479391	0.0399458	7180	tags=47%, list=18%, signal=38%	ENSG00000169562/ENSG00000121270/ENSG00000185933/ENSG00000112759/ENSG00000125257/ENSG00000183128/ENSG00000005022/ENSG00000171017/ENSG00000091262/ENSG00000124786/ENSG00000101986/ENSG00000157593/ENSG00000169359/ENSG00000100372
GO:0032944	GO:0032944	regulation of mononuclear cell proliferation	224	-0.418933	-1.33702	0.00358105	0.0479391	0.0399458	10520	tags=39%, list=27%, signal=29%	ENSG00000206503/ENSG00000123338/ENSG00000121807/ENSG00000136244/ENSG00000196839/ENSG00000147437/ENSG00000169508/ENSG00000090776/ENSG00000134215/ENSG00000049768/ENSG00000158473/ENSG00000242574/ENSG00000134242/ENSG00000006128/ENSG00000115457/ENSG00000143184/ENSG00000196126/ENSG00000111679/ENSG00000065675/ENSG00000017427/ENSG00000115008/ENSG00000162692/ENSG00000178562/ENSG00000107738/ENSG00000125347…
GO:0051261	GO:0051261	protein depolymerization	113	0.294801	1.49455	0.00358162	0.0479391	0.0399458	9154	tags=41%, list=23%, signal=31%	ENSG00000077522/ENSG00000164251/ENSG00000127831/ENSG00000131711/ENSG00000138100/ENSG00000137710/ENSG00000170290/ENSG00000109971/ENSG00000154429/ENSG00000125868/ENSG00000203499/ENSG00000118200/ENSG00000136108/ENSG00000160551/ENSG00000138594/ENSG00000128872/ENSG00000151491/ENSG00000130559/ENSG00000159082/ENSG00000151239/ENSG00000129682/ENSG00000068796/ENSG00000079691/ENSG00000104435/ENSG00000198898…
GO:1901879	GO:1901879	regulation of protein depolymerization	87	0.315578	1.44722	0.00358301	0.0479391	0.0399458	6333	tags=30%, list=16%, signal=25%	ENSG00000077522/ENSG00000164251/ENSG00000127831/ENSG00000131711/ENSG00000138100/ENSG00000137710/ENSG00000170290/ENSG00000125868/ENSG00000203499/ENSG00000118200/ENSG00000136108/ENSG00000160551/ENSG00000138594/ENSG00000128872/ENSG00000151491/ENSG00000130559/ENSG00000151239/ENSG00000129682/ENSG00000079691/ENSG00000104435/ENSG00000198898/ENSG00000105887/ENSG00000134982/ENSG00000006747/ENSG00000121879…
GO:0021692	GO:0021692	cerebellar Purkinje cell layer morphogenesis	17	0.592381	1.87585	0.00359988	0.0480479	0.0400365	1968	tags=24%, list=5%, signal=22%	ENSG00000089116/ENSG00000273706/ENSG00000135472/ENSG00000118193
GO:0021846	GO:0021846	cell proliferation in forebrain	25	0.515407	1.79895	0.00362073	0.0482092	0.0401709	7189	tags=48%, list=18%, signal=39%	ENSG00000089116/ENSG00000154342/ENSG00000118193/ENSG00000184486/ENSG00000159217/ENSG00000138083/ENSG00000150764/ENSG00000162946/ENSG00000167325/ENSG00000168172/ENSG00000004848/ENSG00000066468
GO:0046676	GO:0046676	negative regulation of insulin secretion	38	0.422742	1.68977	0.00370315	0.048977	0.0408107	3736	tags=21%, list=9%, signal=19%	ENSG00000134640/ENSG00000100604/ENSG00000163083/ENSG00000121853/ENSG00000113161/ENSG00000179295/ENSG00000120533/ENSG00000185345
GO:0006885	GO:0006885	regulation of pH	91	0.318667	1.52581	0.0037067	0.048977	0.0408107	7251	tags=33%, list=18%, signal=27%	ENSG00000115616/ENSG00000105929/ENSG00000179331/ENSG00000140519/ENSG00000137561/ENSG00000186009/ENSG00000178301/ENSG00000169504/ENSG00000168748/ENSG00000131238/ENSG00000110955/ENSG00000187446/ENSG00000078401/ENSG00000106460/ENSG00000128973/ENSG00000134851/ENSG00000047249/ENSG00000179630/ENSG00000132681/ENSG00000100030/ENSG00000182220/ENSG00000166148/ENSG00000123892/ENSG00000198689/ENSG00000114062…
GO:0006414	GO:0006414	translational elongation	52	0.374915	1.61019	0.00371049	0.048977	0.0408107	7224	tags=37%, list=18%, signal=30%	ENSG00000112249/ENSG00000211448/ENSG00000090861/ENSG00000198862/ENSG00000168827/ENSG00000140598/ENSG00000138593/ENSG00000143742/ENSG00000103671/ENSG00000107864/ENSG00000198843/ENSG00000134146/ENSG00000154813/ENSG00000163577/ENSG00000101210/ENSG00000103319/ENSG00000112339/ENSG00000156256/ENSG00000135900
GO:2000047	GO:2000047	regulation of cell-cell adhesion mediated by cadherin	21	0.534494	1.79806	0.00372261	0.048977	0.0408107	5481	tags=52%, list=14%, signal=45%	ENSG00000125798/ENSG00000154342/ENSG00000050030/ENSG00000148400/ENSG00000060656/ENSG00000122194/ENSG00000119888/ENSG00000104067/ENSG00000112715/ENSG00000130396/ENSG00000153162
GO:0044827	GO:0044827	modulation by host of viral genome replication	18	0.570319	1.85712	0.00372293	0.048977	0.0408107	9689	tags=78%, list=24%, signal=59%	ENSG00000109971/ENSG00000185345/ENSG00000108700/ENSG00000167085/ENSG00000148175/ENSG00000128829/ENSG00000090061/ENSG00000069275/ENSG00000101558/ENSG00000047188/ENSG00000166794/ENSG00000125875/ENSG00000102081/ENSG00000207870
GO:0045132	GO:0045132	meiotic chromosome segregation	89	0.313454	1.48132	0.00374045	0.0490901	0.0409049	6092	tags=36%, list=15%, signal=30%	ENSG00000133863/ENSG00000167014/ENSG00000175305/ENSG00000164754/ENSG00000168070/ENSG00000176635/ENSG00000155816/ENSG00000129810/ENSG00000143228/ENSG00000136824/ENSG00000143194/ENSG00000156970/ENSG00000113810/ENSG00000120498/ENSG00000138071/ENSG00000161609/ENSG00000144554/ENSG00000020922/ENSG00000169679/ENSG00000178966/ENSG00000143452/ENSG00000147601/ENSG00000269964/ENSG00000112742/ENSG00000175595…
GO:2000177	GO:2000177	regulation of neural precursor cell proliferation	86	0.327656	1.50233	0.00375673	0.049157	0.0409606	4630	tags=28%, list=12%, signal=25%	ENSG00000089116/ENSG00000273706/ENSG00000164690/ENSG00000154342/ENSG00000173404/ENSG00000106278/ENSG00000139352/ENSG00000138798/ENSG00000147100/ENSG00000106689/ENSG00000171241/ENSG00000148400/ENSG00000171540/ENSG00000100644/ENSG00000205336/ENSG00000138083/ENSG00000066279/ENSG00000148704/ENSG00000007372/ENSG00000104290/ENSG00000196712/ENSG00000170558/ENSG00000162946/ENSG00000166145
GO:0043555	GO:0043555	regulation of translation in response to stress	20	0.537137	1.80246	0.00376343	0.049157	0.0409606	7460	tags=60%, list=19%, signal=49%	ENSG00000102580/ENSG00000086598/ENSG00000172071/ENSG00000158615/ENSG00000134001/ENSG00000215301/ENSG00000128829/ENSG00000181163/ENSG00000114867/ENSG00000086232/ENSG00000154059/ENSG00000055332
GO:0042129	GO:0042129	regulation of T cell proliferation	169	-0.431942	-1.36515	0.00377416	0.0491803	0.0409801	10520	tags=40%, list=27%, signal=30%	ENSG00000206503/ENSG00000123338/ENSG00000121807/ENSG00000136244/ENSG00000147437/ENSG00000090776/ENSG00000049768/ENSG00000158473/ENSG00000242574/ENSG00000134242/ENSG00000115457/ENSG00000143184/ENSG00000196126/ENSG00000111679/ENSG00000065675/ENSG00000017427/ENSG00000115008/ENSG00000162692/ENSG00000178562/ENSG00000107738/ENSG00000125347/ENSG00000104951/ENSG00000150782/ENSG00000204632/ENSG00000028137…
GO:0046928	GO:0046928	regulation of neurotransmitter secretion	83	0.319015	1.45547	0.00378488	0.0492034	0.0409993	5416	tags=27%, list=14%, signal=23%	ENSG00000145920/ENSG00000132872/ENSG00000117009/ENSG00000117971/ENSG00000102003/ENSG00000169684/ENSG00000114646/ENSG00000174437/ENSG00000139220/ENSG00000169860/ENSG00000108306/ENSG00000164506/ENSG00000117016/ENSG00000185345/ENSG00000144566/ENSG00000138078/ENSG00000087470/ENSG00000126858/ENSG00000166569/ENSG00000082701/ENSG00000107130/ENSG00000080644
GO:0048524	GO:0048524	positive regulation of viral process	64	0.344536	1.52215	0.00382368	0.0495906	0.0413219	9910	tags=55%, list=25%, signal=41%	ENSG00000137648/ENSG00000048649/ENSG00000184012/ENSG00000070756/ENSG00000148400/ENSG00000092445/ENSG00000074696/ENSG00000083937/ENSG00000185745/ENSG00000096063/ENSG00000182481/ENSG00000124214/ENSG00000115561/ENSG00000174840/ENSG00000148175/ENSG00000135250/ENSG00000155506/ENSG00000124164/ENSG00000215301/ENSG00000025800/ENSG00000135829/ENSG00000171497/ENSG00000196653/ENSG00000101558/ENSG00000075785…
GO:0071549	GO:0071549	cellular response to dexamethasone stimulus	28	0.477748	1.75543	0.0038506	0.0498223	0.041515	6054	tags=39%, list=15%, signal=33%	ENSG00000023839/ENSG00000145545/ENSG00000156804/ENSG00000130707/ENSG00000165474/ENSG00000088305/ENSG00000151247/ENSG00000138592/ENSG00000066926/ENSG00000100889/ENSG00000146648
GO:0019814	GO:0019814	immunoglobulin complex	147	-0.732357	-2.30918	1e-10	1.035e-08	7.59649e-09	6523	tags=74%, list=16%, signal=62%	ENSG00000251546/ENSG00000211651/ENSG00000223648/ENSG00000211957/ENSG00000211633/ENSG00000132465/ENSG00000239819/ENSG00000211642/ENSG00000239975/ENSG00000278857/ENSG00000276775/ENSG00000211892/ENSG00000253497/ENSG00000211964/ENSG00000211654/ENSG00000211955/ENSG00000224373/ENSG00000276566/ENSG00000211944/ENSG00000239951/ENSG00000223350/ENSG00000211639/ENSG00000211970/ENSG00000211976/ENSG00000211660…
GO:0042101	GO:0042101	T cell receptor complex	130	-0.760693	-2.38275	1e-10	1.035e-08	7.59649e-09	7056	tags=87%, list=18%, signal=72%	ENSG00000227191/ENSG00000253188/ENSG00000256553/ENSG00000172116/ENSG00000211714/ENSG00000211799/ENSG00000211780/ENSG00000211793/ENSG00000211825/ENSG00000233306/ENSG00000211782/ENSG00000211720/ENSG00000282499/ENSG00000211819/ENSG00000281958/ENSG00000211815/ENSG00000256590/ENSG00000211788/ENSG00000211794/ENSG00000211777/ENSG00000160654/ENSG00000211797/ENSG00000211807/ENSG00000211776/ENSG00000211795…
GO:0042470	GO:0042470	melanosome	108	0.525242	2.56831	1e-10	1.035e-08	7.59649e-09	9106	tags=62%, list=23%, signal=48%	ENSG00000180176/ENSG00000072274/ENSG00000107165/ENSG00000164924/ENSG00000127022/ENSG00000141367/ENSG00000109971/ENSG00000136235/ENSG00000163399/ENSG00000105281/ENSG00000104388/ENSG00000117450/ENSG00000104044/ENSG00000166900/ENSG00000150093/ENSG00000144566/ENSG00000128595/ENSG00000170248/ENSG00000008282/ENSG00000137501/ENSG00000138069/ENSG00000109133/ENSG00000182718/ENSG00000143870/ENSG00000096384…
GO:0042571	GO:0042571	immunoglobulin complex, circulating	65	-0.732113	-2.15107	1e-10	1.035e-08	7.59649e-09	6353	tags=74%, list=16%, signal=62%	ENSG00000223648/ENSG00000211957/ENSG00000132465/ENSG00000276775/ENSG00000211892/ENSG00000211964/ENSG00000211955/ENSG00000224373/ENSG00000211944/ENSG00000239951/ENSG00000211970/ENSG00000211976/ENSG00000224650/ENSG00000211956/ENSG00000211959/ENSG00000211890/ENSG00000211895/ENSG00000211937/ENSG00000211973/ENSG00000280411/ENSG00000211938/ENSG00000211679/ENSG00000211979/ENSG00000211893/ENSG00000211677…
GO:0048770	GO:0048770	pigment granule	108	0.525242	2.56831	1e-10	1.035e-08	7.59649e-09	9106	tags=62%, list=23%, signal=48%	ENSG00000180176/ENSG00000072274/ENSG00000107165/ENSG00000164924/ENSG00000127022/ENSG00000141367/ENSG00000109971/ENSG00000136235/ENSG00000163399/ENSG00000105281/ENSG00000104388/ENSG00000117450/ENSG00000104044/ENSG00000166900/ENSG00000150093/ENSG00000144566/ENSG00000128595/ENSG00000170248/ENSG00000008282/ENSG00000137501/ENSG00000138069/ENSG00000109133/ENSG00000182718/ENSG00000143870/ENSG00000096384…
GO:0098802	GO:0098802	plasma membrane signaling receptor complex	288	-0.544707	-1.75879	1e-10	1.035e-08	7.59649e-09	8590	tags=50%, list=22%, signal=40%	ENSG00000108556/ENSG00000211697/ENSG00000111679/ENSG00000234965/ENSG00000211821/ENSG00000131477/ENSG00000211816/ENSG00000174453/ENSG00000211806/ENSG00000105605/ENSG00000122679/ENSG00000125845/ENSG00000203896/ENSG00000006116/ENSG00000211784/ENSG00000027644/ENSG00000075429/ENSG00000227191/ENSG00000253188/ENSG00000132329/ENSG00000188730/ENSG00000256553/ENSG00000172116/ENSG00000211714/ENSG00000101017…
GO:0140534	GO:0140534	endoplasmic reticulum protein-containing complex	121	0.450411	2.27429	1.8621e-09	1.65195e-07	1.21246e-07	10678	tags=65%, list=27%, signal=48%	ENSG00000134398/ENSG00000170881/ENSG00000172057/ENSG00000104412/ENSG00000122884/ENSG00000136986/ENSG00000165389/ENSG00000163527/ENSG00000196542/ENSG00000149428/ENSG00000169446/ENSG00000086827/ENSG00000025796/ENSG00000134910/ENSG00000149084/ENSG00000135249/ENSG00000100596/ENSG00000170522/ENSG00000102158/ENSG00000137414/ENSG00000118705/ENSG00000144867/ENSG00000182934/ENSG00000198911/ENSG00000143870…
GO:0030684	GO:0030684	preribosome	77	0.464925	2.09677	1.55842e-06	0.000120972	8.8789e-05	11475	tags=61%, list=29%, signal=43%	ENSG00000147679/ENSG00000164934/ENSG00000253729/ENSG00000117597/ENSG00000275464/ENSG00000058729/ENSG00000151304/ENSG00000119285/ENSG00000067533/ENSG00000120800/ENSG00000134987/ENSG00000196943/ENSG00000132603/ENSG00000124383/ENSG00000101782/ENSG00000141076/ENSG00000087269/ENSG00000011260/ENSG00000167721/ENSG00000055044/ENSG00000108651/ENSG00000065183/ENSG00000047056/ENSG00000124541/ENSG00000119616…
GO:0005643	GO:0005643	nuclear pore	81	0.432367	1.98854	5.74339e-06	0.000396294	0.000290864	10384	tags=62%, list=26%, signal=46%	ENSG00000184575/ENSG00000164188/ENSG00000113569/ENSG00000198088/ENSG00000164109/ENSG00000120533/ENSG00000102753/ENSG00000196862/ENSG00000155561/ENSG00000158553/ENSG00000114030/ENSG00000205339/ENSG00000069248/ENSG00000139496/ENSG00000124789/ENSG00000132341/ENSG00000187627/ENSG00000173744/ENSG00000075188/ENSG00000160294/ENSG00000058804/ENSG00000085415/ENSG00000120253/ENSG00000132953/ENSG00000153201…
GO:0002178	GO:0002178	palmitoyltransferase complex	11	0.856936	2.44303	8.60727e-06	0.000505917	0.000371323	5450	tags=91%, list=14%, signal=78%	ENSG00000172057/ENSG00000165389/ENSG00000147533/ENSG00000196542/ENSG00000188706/ENSG00000100596/ENSG00000155265/ENSG00000123353/ENSG00000172296/ENSG00000090054
GO:0044232	GO:0044232	organelle membrane contact site	40	0.553974	2.20191	8.96149e-06	0.000505917	0.000371323	9029	tags=52%, list=23%, signal=41%	ENSG00000175318/ENSG00000131748/ENSG00000127022/ENSG00000158220/ENSG00000213593/ENSG00000147378/ENSG00000122335/ENSG00000173726/ENSG00000117868/ENSG00000196455/ENSG00000172375/ENSG00000123892/ENSG00000165650/ENSG00000010270/ENSG00000137875/ENSG00000085978/ENSG00000137824/ENSG00000057663/ENSG00000136874/ENSG00000211456/ENSG00000118508
GO:0010494	GO:0010494	cytoplasmic stress granule	76	0.416658	1.88416	2.43312e-05	0.00121598	0.00089248	9469	tags=50%, list=24%, signal=38%	ENSG00000131914/ENSG00000141738/ENSG00000151846/ENSG00000070756/ENSG00000159217/ENSG00000104231/ENSG00000185728/ENSG00000161813/ENSG00000138757/ENSG00000145907/ENSG00000108349/ENSG00000108256/ENSG00000134001/ENSG00000078328/ENSG00000151247/ENSG00000107929/ENSG00000124214/ENSG00000087263/ENSG00000155506/ENSG00000110367/ENSG00000215301/ENSG00000056586/ENSG00000254535/ENSG00000114867/ENSG00000079785…
GO:0030117	GO:0030117	membrane coat	88	0.407357	1.93459	3.02357e-05	0.00121598	0.00089248	8211	tags=44%, list=21%, signal=35%	ENSG00000166557/ENSG00000141367/ENSG00000113615/ENSG00000134970/ENSG00000095139/ENSG00000103723/ENSG00000101310/ENSG00000081014/ENSG00000166747/ENSG00000152700/ENSG00000073921/ENSG00000176986/ENSG00000184432/ENSG00000113282/ENSG00000185313/ENSG00000150961/ENSG00000177879/ENSG00000181789/ENSG00000122218/ENSG00000132842/ENSG00000049283/ENSG00000159082/ENSG00000113966/ENSG00000070718/ENSG00000152056…
GO:0048475	GO:0048475	coated membrane	88	0.407357	1.93459	3.02357e-05	0.00121598	0.00089248	8211	tags=44%, list=21%, signal=35%	ENSG00000166557/ENSG00000141367/ENSG00000113615/ENSG00000134970/ENSG00000095139/ENSG00000103723/ENSG00000101310/ENSG00000081014/ENSG00000166747/ENSG00000152700/ENSG00000073921/ENSG00000176986/ENSG00000184432/ENSG00000113282/ENSG00000185313/ENSG00000150961/ENSG00000177879/ENSG00000181789/ENSG00000122218/ENSG00000132842/ENSG00000049283/ENSG00000159082/ENSG00000113966/ENSG00000070718/ENSG00000152056…
GO:0005778	GO:0005778	peroxisomal membrane	65	0.444304	2.02548	3.13295e-05	0.00121598	0.00089248	7180	tags=42%, list=18%, signal=34%	ENSG00000104381/ENSG00000114757/ENSG00000151726/ENSG00000064763/ENSG00000101417/ENSG00000166575/ENSG00000156968/ENSG00000166821/ENSG00000123983/ENSG00000008394/ENSG00000107897/ENSG00000072210/ENSG00000113161/ENSG00000034693/ENSG00000176485/ENSG00000162928/ENSG00000127980/ENSG00000164751/ENSG00000112357/ENSG00000101986/ENSG00000135241/ENSG00000138138/ENSG00000188554/ENSG00000143761/ENSG00000113312…
GO:0031903	GO:0031903	microbody membrane	65	0.444304	2.02548	3.13295e-05	0.00121598	0.00089248	7180	tags=42%, list=18%, signal=34%	ENSG00000104381/ENSG00000114757/ENSG00000151726/ENSG00000064763/ENSG00000101417/ENSG00000166575/ENSG00000156968/ENSG00000166821/ENSG00000123983/ENSG00000008394/ENSG00000107897/ENSG00000072210/ENSG00000113161/ENSG00000034693/ENSG00000176485/ENSG00000162928/ENSG00000127980/ENSG00000164751/ENSG00000112357/ENSG00000101986/ENSG00000135241/ENSG00000138138/ENSG00000188554/ENSG00000143761/ENSG00000113312…
GO:0005782	GO:0005782	peroxisomal matrix	51	0.491484	2.10627	3.76568e-05	0.00129916	0.000953531	9463	tags=47%, list=24%, signal=36%	ENSG00000172482/ENSG00000205669/ENSG00000103316/ENSG00000138413/ENSG00000119912/ENSG00000144381/ENSG00000140876/ENSG00000107537/ENSG00000102910/ENSG00000213965/ENSG00000168306/ENSG00000095321/ENSG00000116171/ENSG00000112357/ENSG00000112874/ENSG00000242110/ENSG00000116906/ENSG00000179761/ENSG00000177465/ENSG00000018510/ENSG00000203797/ENSG00000161533/ENSG00000087008/ENSG00000117528
GO:0031907	GO:0031907	microbody lumen	51	0.491484	2.10627	3.76568e-05	0.00129916	0.000953531	9463	tags=47%, list=24%, signal=36%	ENSG00000172482/ENSG00000205669/ENSG00000103316/ENSG00000138413/ENSG00000119912/ENSG00000144381/ENSG00000140876/ENSG00000107537/ENSG00000102910/ENSG00000213965/ENSG00000168306/ENSG00000095321/ENSG00000116171/ENSG00000112357/ENSG00000112874/ENSG00000242110/ENSG00000116906/ENSG00000179761/ENSG00000177465/ENSG00000018510/ENSG00000203797/ENSG00000161533/ENSG00000087008/ENSG00000117528
GO:0005682	GO:0005682	U5 snRNP	21	0.690813	2.4062	4.39692e-05	0.0014371	0.00105477	564	tags=14%, list=1%, signal=14%	ENSG00000200156/ENSG00000199568/ENSG00000200169
GO:0009295	GO:0009295	nucleoid	44	0.483746	1.92713	7.43025e-05	0.00219723	0.00161268	9274	tags=52%, list=23%, signal=40%	ENSG00000108829/ENSG00000213585/ENSG00000113013/ENSG00000162851/ENSG00000138095/ENSG00000108064/ENSG00000182199/ENSG00000110955/ENSG00000005022/ENSG00000166855/ENSG00000165637/ENSG00000132463/ENSG00000174173/ENSG00000215251/ENSG00000138346/ENSG00000112096/ENSG00000156502/ENSG00000138029/ENSG00000140521/ENSG00000118246/ENSG00000137992/ENSG00000084754/ENSG00000004142
GO:0042645	GO:0042645	mitochondrial nucleoid	44	0.483746	1.92713	7.43025e-05	0.00219723	0.00161268	9274	tags=52%, list=23%, signal=40%	ENSG00000108829/ENSG00000213585/ENSG00000113013/ENSG00000162851/ENSG00000138095/ENSG00000108064/ENSG00000182199/ENSG00000110955/ENSG00000005022/ENSG00000166855/ENSG00000165637/ENSG00000132463/ENSG00000174173/ENSG00000215251/ENSG00000138346/ENSG00000112096/ENSG00000156502/ENSG00000138029/ENSG00000140521/ENSG00000118246/ENSG00000137992/ENSG00000084754/ENSG00000004142
GO:0030120	GO:0030120	vesicle coat	53	0.459815	1.9986	8.07309e-05	0.00227881	0.00167256	8211	tags=49%, list=21%, signal=39%	ENSG00000166557/ENSG00000141367/ENSG00000113615/ENSG00000134970/ENSG00000095139/ENSG00000101310/ENSG00000166747/ENSG00000152700/ENSG00000176986/ENSG00000184432/ENSG00000113282/ENSG00000150961/ENSG00000181789/ENSG00000122218/ENSG00000049283/ENSG00000152056/ENSG00000138674/ENSG00000119844/ENSG00000138802/ENSG00000129083/ENSG00000089818/ENSG00000111481/ENSG00000117153/ENSG00000006125/ENSG00000100934…
GO:0005798	GO:0005798	Golgi-associated vesicle	95	0.369562	1.80954	9.72619e-05	0.00262607	0.00192743	6788	tags=35%, list=17%, signal=29%	ENSG00000183862/ENSG00000070729/ENSG00000114646/ENSG00000166557/ENSG00000141367/ENSG00000134970/ENSG00000095139/ENSG00000138600/ENSG00000134602/ENSG00000086598/ENSG00000166747/ENSG00000122126/ENSG00000100196/ENSG00000119396/ENSG00000184432/ENSG00000136240/ENSG00000181789/ENSG00000122218/ENSG00000181856/ENSG00000090487/ENSG00000152056/ENSG00000197081/ENSG00000142192/ENSG00000137845/ENSG00000041353…
GO:0070993	GO:0070993	translation preinitiation complex	18	0.674143	2.20284	0.000178484	0.00461827	0.00338962	5554	tags=44%, list=14%, signal=38%	ENSG00000147677/ENSG00000104408/ENSG00000104131/ENSG00000205609/ENSG00000067248/ENSG00000134001/ENSG00000184110/ENSG00000100129
GO:0044233	GO:0044233	mitochondria-associated endoplasmic reticulum membrane	20	0.636964	2.17158	0.000200931	0.00499113	0.00366329	11366	tags=70%, list=29%, signal=50%	ENSG00000127022/ENSG00000213593/ENSG00000147378/ENSG00000122335/ENSG00000173726/ENSG00000123892/ENSG00000165650/ENSG00000137875/ENSG00000057663/ENSG00000136874/ENSG00000118508/ENSG00000166471/ENSG00000121940/ENSG00000185825
GO:0030663	GO:0030663	COPI-coated vesicle membrane	18	0.661579	2.16179	0.000248645	0.00593879	0.00435884	6774	tags=61%, list=17%, signal=51%	ENSG00000166557/ENSG00000134970/ENSG00000095139/ENSG00000086598/ENSG00000100196/ENSG00000184432/ENSG00000136240/ENSG00000181789/ENSG00000122218/ENSG00000129083/ENSG00000111481
GO:0005796	GO:0005796	Golgi lumen	91	0.358601	1.74677	0.000405649	0.00896463	0.00657969	1848	tags=14%, list=5%, signal=14%	ENSG00000172551/ENSG00000130287/ENSG00000154342/ENSG00000167531/ENSG00000205592/ENSG00000204544/ENSG00000181143/ENSG00000169550/ENSG00000215182/ENSG00000115884/ENSG00000104331/ENSG00000157766/ENSG00000114646
GO:0071782	GO:0071782	endoplasmic reticulum tubular network	23	0.59547	2.05784	0.000410393	0.00896463	0.00657969	9050	tags=65%, list=23%, signal=50%	ENSG00000165476/ENSG00000129625/ENSG00000198363/ENSG00000144320/ENSG00000099246/ENSG00000184743/ENSG00000115310/ENSG00000172375/ENSG00000084733/ENSG00000173409/ENSG00000115839/ENSG00000138617/ENSG00000181852/ENSG00000119787/ENSG00000108424
GO:0046540	GO:0046540	U4/U6 x U5 tri-snRNP complex	39	0.479905	1.89696	0.000433074	0.00896463	0.00657969	564	tags=8%, list=1%, signal=8%	ENSG00000200156/ENSG00000199568/ENSG00000200169
GO:0097526	GO:0097526	spliceosomal tri-snRNP complex	39	0.479905	1.89696	0.000433074	0.00896463	0.00657969	564	tags=8%, list=1%, signal=8%	ENSG00000200156/ENSG00000199568/ENSG00000200169
GO:0009897	GO:0009897	external side of plasma membrane	400	-0.40773	-1.32743	0.000471686	0.0089706	0.00658406	6353	tags=29%, list=16%, signal=25%	ENSG00000223648/ENSG00000211957/ENSG00000168685/ENSG00000186891/ENSG00000174175/ENSG00000026751/ENSG00000113302/ENSG00000197471/ENSG00000213809/ENSG00000276775/ENSG00000185291/ENSG00000211892/ENSG00000166825/ENSG00000233306/ENSG00000069493/ENSG00000163599/ENSG00000204642/ENSG00000211964/ENSG00000172215/ENSG00000211955/ENSG00000114455/ENSG00000214279/ENSG00000160654/ENSG00000224373/ENSG00000112115…
GO:0032040	GO:0032040	small-subunit processome	38	0.495216	1.93436	0.000473318	0.0089706	0.00658406	11475	tags=68%, list=29%, signal=49%	ENSG00000147679/ENSG00000164934/ENSG00000253729/ENSG00000117597/ENSG00000275464/ENSG00000119285/ENSG00000120800/ENSG00000134987/ENSG00000124383/ENSG00000141076/ENSG00000087269/ENSG00000011260/ENSG00000055044/ENSG00000108651/ENSG00000065183/ENSG00000119616/ENSG00000115761/ENSG00000079246/ENSG00000132467/ENSG00000165271/ENSG00000111615/ENSG00000177971/ENSG00000101361/ENSG00000156697/ENSG00000148843…
GO:0031201	GO:0031201	SNARE complex	47	0.444982	1.86261	0.000476698	0.0089706	0.00658406	10399	tags=55%, list=26%, signal=41%	ENSG00000145920/ENSG00000145087/ENSG00000178750/ENSG00000164506/ENSG00000166900/ENSG00000124333/ENSG00000166569/ENSG00000117533/ENSG00000134265/ENSG00000114520/ENSG00000117758/ENSG00000135823/ENSG00000106636/ENSG00000049245/ENSG00000108433/ENSG00000136874/ENSG00000265808/ENSG00000105829/ENSG00000099940/ENSG00000105402/ENSG00000092531/ENSG00000151532/ENSG00000171045/ENSG00000108587/ENSG00000100568…
GO:0031261	GO:0031261	DNA replication preinitiation complex	12	0.743814	2.16159	0.000498876	0.00911182	0.00668771	8893	tags=75%, list=22%, signal=58%	ENSG00000104738/ENSG00000147536/ENSG00000101003/ENSG00000073111/ENSG00000076003/ENSG00000093009/ENSG00000181938/ENSG00000135336/ENSG00000112118
GO:0017101	GO:0017101	aminoacyl-tRNA synthetase multienzyme complex	11	0.75376	2.14888	0.00056739	0.00986284	0.00723894	7872	tags=82%, list=20%, signal=66%	ENSG00000136628/ENSG00000196305/ENSG00000166986/ENSG00000133706/ENSG00000106305/ENSG00000113643/ENSG00000164022/ENSG00000115866/ENSG00000124802
GO:0032433	GO:0032433	filopodium tip	17	0.657015	2.05564	0.00057996	0.00986284	0.00723894	9210	tags=65%, list=23%, signal=50%	ENSG00000127831/ENSG00000104290/ENSG00000273749/ENSG00000078140/ENSG00000145555/ENSG00000095777/ENSG00000136754/ENSG00000119328/ENSG00000197535/ENSG00000070882/ENSG00000102081
GO:0016282	GO:0016282	eukaryotic 43S preinitiation complex	17	0.655859	2.05203	0.000587641	0.00986284	0.00723894	5554	tags=41%, list=14%, signal=35%	ENSG00000147677/ENSG00000104408/ENSG00000104131/ENSG00000205609/ENSG00000067248/ENSG00000184110/ENSG00000100129
GO:0030660	GO:0030660	Golgi-associated vesicle membrane	53	0.414391	1.80116	0.000655462	0.0103687	0.0076102	4865	tags=30%, list=12%, signal=27%	ENSG00000183862/ENSG00000070729/ENSG00000114646/ENSG00000166557/ENSG00000141367/ENSG00000134970/ENSG00000095139/ENSG00000138600/ENSG00000086598/ENSG00000166747/ENSG00000100196/ENSG00000184432/ENSG00000136240/ENSG00000181789/ENSG00000122218/ENSG00000152056
GO:0031248	GO:0031248	protein acetyltransferase complex	85	0.353103	1.63115	0.000681359	0.0103687	0.0076102	9265	tags=36%, list=23%, signal=28%	ENSG00000156269/ENSG00000077080/ENSG00000169067/ENSG00000064313/ENSG00000224287/ENSG00000121579/ENSG00000120533/ENSG00000083168/ENSG00000129292/ENSG00000164134/ENSG00000136518/ENSG00000185787/ENSG00000188895/ENSG00000111300/ENSG00000124422/ENSG00000135801/ENSG00000139977/ENSG00000123562/ENSG00000025293/ENSG00000135040/ENSG00000152382/ENSG00000139620/ENSG00000187325/ENSG00000173418/ENSG00000178913…
GO:1902493	GO:1902493	acetyltransferase complex	85	0.353103	1.63115	0.000681359	0.0103687	0.0076102	9265	tags=36%, list=23%, signal=28%	ENSG00000156269/ENSG00000077080/ENSG00000169067/ENSG00000064313/ENSG00000224287/ENSG00000121579/ENSG00000120533/ENSG00000083168/ENSG00000129292/ENSG00000164134/ENSG00000136518/ENSG00000185787/ENSG00000188895/ENSG00000111300/ENSG00000124422/ENSG00000135801/ENSG00000139977/ENSG00000123562/ENSG00000025293/ENSG00000135040/ENSG00000152382/ENSG00000139620/ENSG00000187325/ENSG00000173418/ENSG00000178913…
GO:0034518	GO:0034518	RNA cap binding complex	13	0.71805	2.13423	0.000684566	0.0103687	0.0076102	7284	tags=62%, list=18%, signal=50%	ENSG00000175766/ENSG00000170935/ENSG00000136937/ENSG00000123908/ENSG00000151247/ENSG00000273749/ENSG00000101654/ENSG00000169612
GO:1902562	GO:1902562	H4 histone acetyltransferase complex	32	0.503916	1.95917	0.000736191	0.0106884	0.00784485	5784	tags=28%, list=15%, signal=24%	ENSG00000077080/ENSG00000169067/ENSG00000224287/ENSG00000129292/ENSG00000136518/ENSG00000185787/ENSG00000188895/ENSG00000123562/ENSG00000025293
GO:0005903	GO:0005903	brush border	105	0.320982	1.62545	0.000740097	0.0106884	0.00784485	4802	tags=25%, list=12%, signal=22%	ENSG00000090402/ENSG00000023839/ENSG00000105929/ENSG00000088386/ENSG00000175311/ENSG00000154646/ENSG00000156222/ENSG00000119121/ENSG00000120756/ENSG00000127831/ENSG00000100170/ENSG00000131183/ENSG00000174358/ENSG00000074276/ENSG00000176658/ENSG00000096433/ENSG00000137860/ENSG00000151012/ENSG00000135750/ENSG00000162105/ENSG00000151491/ENSG00000134294/ENSG00000157483/ENSG00000087470/ENSG00000138792…
GO:0044322	GO:0044322	endoplasmic reticulum quality control compartment	24	0.555103	1.93768	0.000800937	0.0113041	0.00829679	9420	tags=54%, list=24%, signal=41%	ENSG00000134398/ENSG00000170881/ENSG00000127022/ENSG00000136986/ENSG00000116406/ENSG00000136731/ENSG00000145495/ENSG00000068912/ENSG00000051108/ENSG00000239305/ENSG00000134109/ENSG00000159461/ENSG00000102595
GO:0030137	GO:0030137	COPI-coated vesicle	28	0.542485	2.00996	0.000892262	0.0123044	0.00903094	9193	tags=54%, list=23%, signal=41%	ENSG00000166557/ENSG00000134970/ENSG00000095139/ENSG00000086598/ENSG00000100196/ENSG00000184432/ENSG00000136240/ENSG00000181789/ENSG00000122218/ENSG00000129083/ENSG00000143761/ENSG00000111481/ENSG00000170348/ENSG00000265808/ENSG00000105438
GO:0032592	GO:0032592	integral component of mitochondrial membrane	86	0.342158	1.59186	0.000914298	0.0123044	0.00903094	7155	tags=34%, list=18%, signal=28%	ENSG00000104381/ENSG00000176171/ENSG00000175606/ENSG00000110090/ENSG00000113013/ENSG00000155008/ENSG00000135776/ENSG00000165678/ENSG00000134375/ENSG00000171109/ENSG00000141385/ENSG00000087299/ENSG00000050393/ENSG00000102401/ENSG00000126858/ENSG00000173726/ENSG00000134278/ENSG00000060762/ENSG00000132305/ENSG00000173085/ENSG00000075415/ENSG00000164466/ENSG00000171503/ENSG00000163626/ENSG00000204152…
GO:0045239	GO:0045239	tricarboxylic acid cycle enzyme complex	13	0.707776	2.1037	0.000931251	0.0123044	0.00903094	9975	tags=77%, list=25%, signal=58%	ENSG00000091483/ENSG00000091140/ENSG00000172340/ENSG00000136143/ENSG00000105953/ENSG00000163541/ENSG00000119689/ENSG00000134056/ENSG00000137992/ENSG00000083123
GO:0042611	GO:0042611	MHC protein complex	22	-0.678377	-1.69991	0.000958089	0.0123953	0.00909764	12499	tags=91%, list=32%, signal=62%	ENSG00000204592/ENSG00000231389/ENSG00000204525/ENSG00000206503/ENSG00000204287/ENSG00000242574/ENSG00000234745/ENSG00000196735/ENSG00000196126/ENSG00000204257/ENSG00000204252/ENSG00000204632/ENSG00000019582/ENSG00000198502/ENSG00000179344/ENSG00000223865/ENSG00000204642/ENSG00000237541/ENSG00000232629/ENSG00000241106
GO:0000138	GO:0000138	Golgi trans cisterna	11	0.736924	2.10088	0.0010168	0.012849	0.00943063	9217	tags=82%, list=23%, signal=63%	ENSG00000008513/ENSG00000198964/ENSG00000179562/ENSG00000181704/ENSG00000058799/ENSG00000086062/ENSG00000130733/ENSG00000116209/ENSG00000105829
GO:0043195	GO:0043195	terminal bouton	53	0.404401	1.75773	0.00104102	0.012849	0.00943063	5615	tags=30%, list=14%, signal=26%	ENSG00000145920/ENSG00000180176/ENSG00000070729/ENSG00000102003/ENSG00000079689/ENSG00000101188/ENSG00000187094/ENSG00000164099/ENSG00000109971/ENSG00000155093/ENSG00000144566/ENSG00000159082/ENSG00000166569/ENSG00000273749/ENSG00000162065/ENSG00000130477
GO:1902911	GO:1902911	protein kinase complex	94	0.33044	1.61474	0.00105523	0.012849	0.00943063	7840	tags=41%, list=20%, signal=33%	ENSG00000115592/ENSG00000175305/ENSG00000171450/ENSG00000102893/ENSG00000167258/ENSG00000106799/ENSG00000114302/ENSG00000023287/ENSG00000145386/ENSG00000132356/ENSG00000067177/ENSG00000213341/ENSG00000157456/ENSG00000134057/ENSG00000176749/ENSG00000131791/ENSG00000108100/ENSG00000181929/ENSG00000170312/ENSG00000129315/ENSG00000132646/ENSG00000082805/ENSG00000135932/ENSG00000135083/ENSG00000135503…
GO:0030686	GO:0030686	90S preribosome	29	0.51438	1.92423	0.00110438	0.0131889	0.0096801	10982	tags=66%, list=28%, signal=47%	ENSG00000275464/ENSG00000151304/ENSG00000119285/ENSG00000120800/ENSG00000134987/ENSG00000196943/ENSG00000124383/ENSG00000141076/ENSG00000087269/ENSG00000011260/ENSG00000108651/ENSG00000065183/ENSG00000124541/ENSG00000138442/ENSG00000171490/ENSG00000165733/ENSG00000165271/ENSG00000261236/ENSG00000177971
GO:0033290	GO:0033290	eukaryotic 48S preinitiation complex	15	0.671064	2.03936	0.00125708	0.014467	0.0106182	5554	tags=47%, list=14%, signal=40%	ENSG00000147677/ENSG00000104408/ENSG00000104131/ENSG00000205609/ENSG00000134001/ENSG00000184110/ENSG00000100129
GO:0098573	GO:0098573	intrinsic component of mitochondrial membrane	87	0.337878	1.58414	0.001258	0.014467	0.0106182	7155	tags=33%, list=18%, signal=27%	ENSG00000104381/ENSG00000176171/ENSG00000175606/ENSG00000110090/ENSG00000113013/ENSG00000155008/ENSG00000135776/ENSG00000165678/ENSG00000134375/ENSG00000171109/ENSG00000141385/ENSG00000087299/ENSG00000050393/ENSG00000102401/ENSG00000126858/ENSG00000173726/ENSG00000134278/ENSG00000060762/ENSG00000132305/ENSG00000173085/ENSG00000075415/ENSG00000164466/ENSG00000171503/ENSG00000163626/ENSG00000204152…
GO:0005657	GO:0005657	replication fork	60	0.387979	1.70733	0.00129367	0.0146067	0.0107207	10694	tags=62%, list=27%, signal=45%	ENSG00000133119/ENSG00000149554/ENSG00000065328/ENSG00000104320/ENSG00000197299/ENSG00000077514/ENSG00000198056/ENSG00000075131/ENSG00000020922/ENSG00000119048/ENSG00000132646/ENSG00000163104/ENSG00000159147/ENSG00000163918/ENSG00000111602/ENSG00000153147/ENSG00000198554/ENSG00000111445/ENSG00000070950/ENSG00000101868/ENSG00000132383/ENSG00000146263/ENSG00000121988/ENSG00000276043/ENSG00000170734…
GO:0005838	GO:0005838	proteasome regulatory particle	19	0.60906	2.02735	0.00135696	0.0150477	0.0110444	9894	tags=63%, list=25%, signal=47%	ENSG00000103035/ENSG00000108671/ENSG00000108344/ENSG00000197170/ENSG00000115233/ENSG00000100764/ENSG00000175166/ENSG00000173692/ENSG00000099341/ENSG00000161057/ENSG00000100519/ENSG00000163636
GO:0000940	GO:0000940	outer kinetochore	11	0.727076	2.07281	0.00138878	0.0151303	0.0111051	9058	tags=82%, list=23%, signal=63%	ENSG00000165480/ENSG00000156970/ENSG00000117724/ENSG00000134057/ENSG00000182628/ENSG00000040275/ENSG00000154839/ENSG00000166851/ENSG00000080986
GO:0034705	GO:0034705	potassium channel complex	87	0.332869	1.56066	0.00142899	0.0153	0.0112296	3984	tags=24%, list=10%, signal=22%	ENSG00000197584/ENSG00000182255/ENSG00000168135/ENSG00000138622/ENSG00000075043/ENSG00000164794/ENSG00000026559/ENSG00000055118/ENSG00000164588/ENSG00000171126/ENSG00000159197/ENSG00000174469/ENSG00000162494/ENSG00000182674/ENSG00000164418/ENSG00000170745/ENSG00000117013/ENSG00000162763/ENSG00000143933/ENSG00000135750/ENSG00000151079
GO:0098982	GO:0098982	GABA-ergic synapse	69	0.37531	1.70712	0.00152848	0.0160675	0.0117929	3299	tags=22%, list=8%, signal=20%	ENSG00000011677/ENSG00000132164/ENSG00000197106/ENSG00000178235/ENSG00000146938/ENSG00000067842/ENSG00000080854/ENSG00000186297/ENSG00000040731/ENSG00000114646/ENSG00000182621/ENSG00000156642/ENSG00000164116/ENSG00000140945/ENSG00000145864
GO:0055029	GO:0055029	nuclear DNA-directed RNA polymerase complex	99	0.317518	1.60428	0.00155242	0.0160675	0.0117929	9633	tags=42%, list=24%, signal=32%	ENSG00000064313/ENSG00000147669/ENSG00000013503/ENSG00000187735/ENSG00000134371/ENSG00000166477/ENSG00000198056/ENSG00000164751/ENSG00000047315/ENSG00000165417/ENSG00000140395/ENSG00000135801/ENSG00000102978/ENSG00000105849/ENSG00000125630/ENSG00000141425/ENSG00000113356/ENSG00000153767/ENSG00000197780/ENSG00000111358/ENSG00000101413/ENSG00000272047/ENSG00000134058/ENSG00000241258/ENSG00000187325…
GO:0033391	GO:0033391	chromatoid body	13	0.679354	2.01922	0.00159901	0.0162784	0.0119477	5804	tags=62%, list=15%, signal=53%	ENSG00000095627/ENSG00000125207/ENSG00000037474/ENSG00000134852/ENSG00000143194/ENSG00000151247/ENSG00000162782/ENSG00000110367
GO:0005845	GO:0005845	mRNA cap binding complex	11	0.72111	2.0558	0.00165975	0.0166243	0.0122016	9369	tags=82%, list=24%, signal=62%	ENSG00000175766/ENSG00000136937/ENSG00000123908/ENSG00000151247/ENSG00000273749/ENSG00000101654/ENSG00000169612/ENSG00000102081/ENSG00000114503
GO:0043679	GO:0043679	axon terminus	117	0.301196	1.48771	0.00168793	0.0166382	0.0122118	1085	tags=12%, list=3%, signal=12%	ENSG00000145920/ENSG00000180176/ENSG00000074317/ENSG00000070729/ENSG00000102003/ENSG00000079689/ENSG00000150394/ENSG00000128683/ENSG00000116329/ENSG00000101188/ENSG00000187094/ENSG00000082556/ENSG00000168539/ENSG00000118160
GO:0030904	GO:0030904	retromer complex	12	0.710256	2.06407	0.00177391	0.0172125	0.0126333	9687	tags=83%, list=24%, signal=63%	ENSG00000069329/ENSG00000122958/ENSG00000137145/ENSG00000151502/ENSG00000205302/ENSG00000131374/ENSG00000129515/ENSG00000112335/ENSG00000089006/ENSG00000111237
GO:0008076	GO:0008076	voltage-gated potassium channel complex	78	0.343942	1.56622	0.00187648	0.0179276	0.0131582	3984	tags=26%, list=10%, signal=23%	ENSG00000197584/ENSG00000182255/ENSG00000168135/ENSG00000138622/ENSG00000075043/ENSG00000164794/ENSG00000026559/ENSG00000055118/ENSG00000164588/ENSG00000171126/ENSG00000159197/ENSG00000174469/ENSG00000162494/ENSG00000182674/ENSG00000170745/ENSG00000117013/ENSG00000162763/ENSG00000143933/ENSG00000135750/ENSG00000151079
GO:0005881	GO:0005881	cytoplasmic microtubule	75	0.3412	1.55608	0.00211724	0.0199213	0.0146215	10579	tags=48%, list=27%, signal=35%	ENSG00000255974/ENSG00000132938/ENSG00000165476/ENSG00000105514/ENSG00000154429/ENSG00000167553/ENSG00000164114/ENSG00000103494/ENSG00000181781/ENSG00000144867/ENSG00000101367/ENSG00000072803/ENSG00000123416/ENSG00000113966/ENSG00000124198/ENSG00000121621/ENSG00000120742/ENSG00000134982/ENSG00000131871/ENSG00000165169/ENSG00000007168/ENSG00000155324/ENSG00000147642/ENSG00000119777/ENSG00000142945…
GO:0070160	GO:0070160	tight junction	126	0.288568	1.49081	0.00218248	0.0202287	0.0148471	8304	tags=34%, list=21%, signal=27%	ENSG00000124429/ENSG00000165376/ENSG00000163347/ENSG00000095203/ENSG00000183067/ENSG00000184697/ENSG00000147649/ENSG00000114346/ENSG00000156284/ENSG00000154639/ENSG00000002726/ENSG00000106799/ENSG00000119888/ENSG00000261150/ENSG00000197822/ENSG00000126016/ENSG00000152939/ENSG00000163558/ENSG00000150054/ENSG00000145390/ENSG00000115808/ENSG00000123728/ENSG00000170248/ENSG00000103494/ENSG00000151150…
GO:0005876	GO:0005876	spindle microtubule	70	0.358455	1.62028	0.00224178	0.0203355	0.0149254	8157	tags=47%, list=21%, signal=37%	ENSG00000141367/ENSG00000166004/ENSG00000154429/ENSG00000086827/ENSG00000103769/ENSG00000165480/ENSG00000176623/ENSG00000164114/ENSG00000143933/ENSG00000138778/ENSG00000138160/ENSG00000101367/ENSG00000137814/ENSG00000068796/ENSG00000090889/ENSG00000075945/ENSG00000182628/ENSG00000131437/ENSG00000170312/ENSG00000036257/ENSG00000121621/ENSG00000198668/ENSG00000101350/ENSG00000154839/ENSG00000165169…
GO:0034708	GO:0034708	methyltransferase complex	87	0.324772	1.52269	0.0022595	0.0203355	0.0149254	10413	tags=46%, list=26%, signal=34%	ENSG00000178691/ENSG00000164944/ENSG00000074201/ENSG00000117222/ENSG00000111727/ENSG00000074266/ENSG00000025293/ENSG00000089195/ENSG00000100462/ENSG00000102054/ENSG00000110851/ENSG00000196591/ENSG00000139154/ENSG00000196981/ENSG00000101654/ENSG00000169612/ENSG00000048052/ENSG00000182004/ENSG00000094916/ENSG00000105879/ENSG00000100028/ENSG00000160193/ENSG00000106462/ENSG00000178913/ENSG00000008083…
GO:0098889	GO:0098889	intrinsic component of presynaptic membrane	73	0.349578	1.56285	0.00231132	0.0205047	0.0150497	5171	tags=32%, list=13%, signal=27%	ENSG00000142319/ENSG00000160716/ENSG00000132164/ENSG00000196517/ENSG00000116329/ENSG00000155897/ENSG00000067842/ENSG00000082556/ENSG00000168539/ENSG00000186297/ENSG00000040731/ENSG00000018236/ENSG00000127022/ENSG00000169860/ENSG00000156642/ENSG00000162631/ENSG00000185313/ENSG00000076716/ENSG00000058668/ENSG00000170558/ENSG00000162736/ENSG00000165970/ENSG00000118946
GO:1902711	GO:1902711	GABA-A receptor complex	18	0.587403	1.91941	0.00238862	0.020892	0.0153339	1269	tags=22%, list=3%, signal=22%	ENSG00000011677/ENSG00000268089/ENSG00000166206/ENSG00000186297
GO:0022624	GO:0022624	proteasome accessory complex	23	0.535177	1.84948	0.00244111	0.0209108	0.0153477	8064	tags=52%, list=20%, signal=42%	ENSG00000103035/ENSG00000108671/ENSG00000095261/ENSG00000108344/ENSG00000197170/ENSG00000131467/ENSG00000115233/ENSG00000100764/ENSG00000175166/ENSG00000173692/ENSG00000099341/ENSG00000161057
GO:0071162	GO:0071162	CMG complex	10	0.737308	2.0168	0.00245811	0.0209108	0.0153477	8893	tags=70%, list=22%, signal=54%	ENSG00000104738/ENSG00000147536/ENSG00000101003/ENSG00000073111/ENSG00000076003/ENSG00000181938/ENSG00000112118
GO:0033162	GO:0033162	melanosome membrane	18	0.584583	1.91019	0.00257354	0.0210191	0.0154272	7089	tags=50%, list=18%, signal=41%	ENSG00000180176/ENSG00000107165/ENSG00000136235/ENSG00000104044/ENSG00000123892/ENSG00000164175/ENSG00000165240/ENSG00000077498/ENSG00000075785
GO:0045009	GO:0045009	chitosome	18	0.584583	1.91019	0.00257354	0.0210191	0.0154272	7089	tags=50%, list=18%, signal=41%	ENSG00000180176/ENSG00000107165/ENSG00000136235/ENSG00000104044/ENSG00000123892/ENSG00000164175/ENSG00000165240/ENSG00000077498/ENSG00000075785
GO:0090741	GO:0090741	pigment granule membrane	18	0.584583	1.91019	0.00257354	0.0210191	0.0154272	7089	tags=50%, list=18%, signal=41%	ENSG00000180176/ENSG00000107165/ENSG00000136235/ENSG00000104044/ENSG00000123892/ENSG00000164175/ENSG00000165240/ENSG00000077498/ENSG00000075785
GO:0000428	GO:0000428	DNA-directed RNA polymerase complex	100	0.310379	1.57172	0.00260623	0.0210191	0.0154272	9633	tags=42%, list=24%, signal=32%	ENSG00000064313/ENSG00000147669/ENSG00000013503/ENSG00000187735/ENSG00000134371/ENSG00000166477/ENSG00000198056/ENSG00000164751/ENSG00000047315/ENSG00000165417/ENSG00000140395/ENSG00000135801/ENSG00000102978/ENSG00000105849/ENSG00000125630/ENSG00000141425/ENSG00000113356/ENSG00000153767/ENSG00000197780/ENSG00000111358/ENSG00000101413/ENSG00000272047/ENSG00000134058/ENSG00000241258/ENSG00000187325…
GO:0000407	GO:0000407	phagophore assembly site	33	0.442379	1.71377	0.00276949	0.0220494	0.0161834	10103	tags=42%, list=26%, signal=32%	ENSG00000023287/ENSG00000161011/ENSG00000198925/ENSG00000117758/ENSG00000188554/ENSG00000125149/ENSG00000085978/ENSG00000153339/ENSG00000197548/ENSG00000057663/ENSG00000196821/ENSG00000145782/ENSG00000066739/ENSG00000126581
GO:0016592	GO:0016592	mediator complex	40	0.424337	1.68663	0.00282023	0.0221692	0.0162713	10807	tags=50%, list=27%, signal=36%	ENSG00000155846/ENSG00000125686/ENSG00000132964/ENSG00000155111/ENSG00000112237/ENSG00000180182/ENSG00000164758/ENSG00000152944/ENSG00000105810/ENSG00000135446/ENSG00000112282/ENSG00000008838/ENSG00000029363/ENSG00000130772/ENSG00000124641/ENSG00000108510/ENSG00000123066/ENSG00000155868/ENSG00000063322/ENSG00000159479
GO:0030126	GO:0030126	COPI vesicle coat	13	0.656825	1.95226	0.00311415	0.0241424	0.0177195	6774	tags=62%, list=17%, signal=51%	ENSG00000166557/ENSG00000134970/ENSG00000095139/ENSG00000184432/ENSG00000181789/ENSG00000122218/ENSG00000129083/ENSG00000111481
GO:0035577	GO:0035577	azurophil granule membrane	57	0.381618	1.66029	0.003149	0.0241424	0.0177195	5557	tags=32%, list=14%, signal=27%	ENSG00000086548/ENSG00000179869/ENSG00000014257/ENSG00000085719/ENSG00000105514/ENSG00000008394/ENSG00000151366/ENSG00000058063/ENSG00000102158/ENSG00000124333/ENSG00000173930/ENSG00000005893/ENSG00000148248/ENSG00000162736/ENSG00000138246/ENSG00000153395/ENSG00000136026/ENSG00000148175
GO:0098533	GO:0098533	ATPase dependent transmembrane transport complex	24	0.501411	1.75026	0.00320011	0.024235	0.0177875	7974	tags=54%, list=20%, signal=43%	ENSG00000150201/ENSG00000105409/ENSG00000186009/ENSG00000163399/ENSG00000143921/ENSG00000143153/ENSG00000132681/ENSG00000101892/ENSG00000198523/ENSG00000069849/ENSG00000090020/ENSG00000069431/ENSG00000075673
GO:0035267	GO:0035267	NuA4 histone acetyltransferase complex	21	0.565302	1.96903	0.00334254	0.0247109	0.0181368	5469	tags=29%, list=14%, signal=25%	ENSG00000077080/ENSG00000169067/ENSG00000224287/ENSG00000136518/ENSG00000185787/ENSG00000123562
GO:0043189	GO:0043189	H4/H2A histone acetyltransferase complex	21	0.565302	1.96903	0.00334254	0.0247109	0.0181368	5469	tags=29%, list=14%, signal=25%	ENSG00000077080/ENSG00000169067/ENSG00000224287/ENSG00000136518/ENSG00000185787/ENSG00000123562
GO:0005923	GO:0005923	bicellular tight junction	119	0.297881	1.47149	0.00339648	0.0248143	0.0182127	4656	tags=23%, list=12%, signal=20%	ENSG00000124429/ENSG00000165376/ENSG00000163347/ENSG00000095203/ENSG00000183067/ENSG00000184697/ENSG00000147649/ENSG00000114346/ENSG00000156284/ENSG00000154639/ENSG00000002726/ENSG00000106799/ENSG00000119888/ENSG00000261150/ENSG00000197822/ENSG00000126016/ENSG00000152939/ENSG00000163558/ENSG00000150054/ENSG00000145390/ENSG00000115808/ENSG00000123728/ENSG00000170248/ENSG00000103494/ENSG00000151150…
GO:0042613	GO:0042613	MHC class II protein complex	15	-0.704717	-1.65504	0.0035261	0.0251497	0.0184589	10019	tags=87%, list=25%, signal=65%	ENSG00000204287/ENSG00000242574/ENSG00000196735/ENSG00000196126/ENSG00000204257/ENSG00000204252/ENSG00000019582/ENSG00000198502/ENSG00000179344/ENSG00000223865/ENSG00000237541/ENSG00000232629/ENSG00000241106
GO:0000314	GO:0000314	organellar small ribosomal subunit	28	0.493681	1.82914	0.00360439	0.0251497	0.0184589	10054	tags=57%, list=25%, signal=43%	ENSG00000061794/ENSG00000048544/ENSG00000182180/ENSG00000243927/ENSG00000198015/ENSG00000204568/ENSG00000132676/ENSG00000175110/ENSG00000134056/ENSG00000113048/ENSG00000181991/ENSG00000147586/ENSG00000135972/ENSG00000096080/ENSG00000122140/ENSG00000120333
GO:0005763	GO:0005763	mitochondrial small ribosomal subunit	28	0.493681	1.82914	0.00360439	0.0251497	0.0184589	10054	tags=57%, list=25%, signal=43%	ENSG00000061794/ENSG00000048544/ENSG00000182180/ENSG00000243927/ENSG00000198015/ENSG00000204568/ENSG00000132676/ENSG00000175110/ENSG00000134056/ENSG00000113048/ENSG00000181991/ENSG00000147586/ENSG00000135972/ENSG00000096080/ENSG00000122140/ENSG00000120333
GO:0101031	GO:0101031	chaperone complex	28	0.494072	1.83059	0.00360439	0.0251497	0.0184589	6561	tags=46%, list=17%, signal=39%	ENSG00000152137/ENSG00000109971/ENSG00000120438/ENSG00000150753/ENSG00000110958/ENSG00000156261/ENSG00000096384/ENSG00000115484/ENSG00000166226/ENSG00000168439/ENSG00000183527/ENSG00000146731/ENSG00000090520
GO:0031985	GO:0031985	Golgi cisterna	115	0.288701	1.42919	0.00370519	0.0254733	0.0186964	7196	tags=35%, list=18%, signal=29%	ENSG00000156413/ENSG00000171124/ENSG00000154252/ENSG00000170091/ENSG00000166557/ENSG00000115339/ENSG00000112893/ENSG00000175229/ENSG00000184389/ENSG00000144381/ENSG00000176920/ENSG00000086598/ENSG00000137502/ENSG00000152700/ENSG00000113384/ENSG00000103978/ENSG00000110080/ENSG00000008513/ENSG00000115540/ENSG00000120519/ENSG00000073849/ENSG00000169826/ENSG00000198964/ENSG00000017260/ENSG00000175164…
GO:0016328	GO:0016328	lateral plasma membrane	61	0.369209	1.62027	0.00373281	0.0254733	0.0186964	6255	tags=34%, list=16%, signal=29%	ENSG00000169562/ENSG00000196517/ENSG00000163347/ENSG00000039068/ENSG00000119888/ENSG00000197822/ENSG00000163399/ENSG00000165474/ENSG00000150054/ENSG00000170615/ENSG00000064651/ENSG00000104290/ENSG00000151150/ENSG00000075711/ENSG00000143153/ENSG00000129682/ENSG00000110880/ENSG00000091262/ENSG00000183856/ENSG00000134982/ENSG00000173218
GO:0001772	GO:0001772	immunological synapse	44	-0.554612	-1.56006	0.00391604	0.0264333	0.019401	10019	tags=48%, list=25%, signal=36%	ENSG00000204287/ENSG00000134215/ENSG00000196126/ENSG00000065675/ENSG00000161929/ENSG00000143119/ENSG00000178562/ENSG00000104951/ENSG00000168421/ENSG00000187889/ENSG00000213658/ENSG00000109943/ENSG00000100453/ENSG00000198286/ENSG00000013725/ENSG00000145649/ENSG00000104894/ENSG00000182866/ENSG00000198851/ENSG00000102879/ENSG00000115085
GO:0030880	GO:0030880	RNA polymerase complex	103	0.297573	1.47548	0.00415385	0.027737	0.0203579	9633	tags=42%, list=24%, signal=32%	ENSG00000064313/ENSG00000147669/ENSG00000013503/ENSG00000187735/ENSG00000134371/ENSG00000166477/ENSG00000198056/ENSG00000164751/ENSG00000047315/ENSG00000165417/ENSG00000140395/ENSG00000135801/ENSG00000102978/ENSG00000105849/ENSG00000125630/ENSG00000141425/ENSG00000113356/ENSG00000153767/ENSG00000197780/ENSG00000111358/ENSG00000101413/ENSG00000272047/ENSG00000134058/ENSG00000241258/ENSG00000187325…
GO:0099056	GO:0099056	integral component of presynaptic membrane	65	0.343905	1.56778	0.00427032	0.0282114	0.020706	2749	tags=22%, list=7%, signal=20%	ENSG00000142319/ENSG00000160716/ENSG00000132164/ENSG00000196517/ENSG00000116329/ENSG00000155897/ENSG00000067842/ENSG00000082556/ENSG00000168539/ENSG00000186297/ENSG00000040731/ENSG00000127022/ENSG00000169860/ENSG00000156642
GO:0090533	GO:0090533	cation-transporting ATPase complex	18	0.556607	1.81878	0.00486277	0.0317872	0.0233305	7974	tags=67%, list=20%, signal=53%	ENSG00000150201/ENSG00000105409/ENSG00000186009/ENSG00000163399/ENSG00000143153/ENSG00000132681/ENSG00000101892/ENSG00000198523/ENSG00000069849/ENSG00000090020/ENSG00000069431/ENSG00000075673
GO:0098688	GO:0098688	parallel fiber to Purkinje cell synapse	14	0.616172	1.85868	0.00528723	0.0342018	0.0251027	4467	tags=43%, list=11%, signal=38%	ENSG00000196517/ENSG00000067842/ENSG00000102924/ENSG00000101333/ENSG00000152208/ENSG00000159082
GO:0005790	GO:0005790	smooth endoplasmic reticulum	33	0.416566	1.61377	0.00537923	0.0344382	0.0252763	3611	tags=27%, list=9%, signal=25%	ENSG00000180176/ENSG00000198626/ENSG00000167614/ENSG00000127022/ENSG00000101333/ENSG00000149428/ENSG00000102580/ENSG00000176658/ENSG00000101856
GO:0098563	GO:0098563	intrinsic component of synaptic vesicle membrane	46	0.383855	1.58121	0.00566114	0.0358732	0.0263295	7694	tags=48%, list=19%, signal=39%	ENSG00000132872/ENSG00000197106/ENSG00000196517/ENSG00000102003/ENSG00000116329/ENSG00000169213/ENSG00000082556/ENSG00000122012/ENSG00000155093/ENSG00000124333/ENSG00000144566/ENSG00000179520/ENSG00000008282/ENSG00000168118/ENSG00000117533/ENSG00000041353/ENSG00000117758/ENSG00000109501/ENSG00000135823/ENSG00000070961/ENSG00000101152/ENSG00000105426
GO:0030014	GO:0030014	CCR4-NOT complex	14	0.605693	1.82707	0.0059154	0.0366117	0.0268715	11079	tags=64%, list=28%, signal=46%	ENSG00000125107/ENSG00000141232/ENSG00000107864/ENSG00000113300/ENSG00000158435/ENSG00000182973/ENSG00000138767/ENSG00000080802/ENSG00000149115
GO:0031462	GO:0031462	Cul2-RING ubiquitin ligase complex	22	0.50968	1.76507	0.00596595	0.0366117	0.0268715	6903	tags=41%, list=17%, signal=34%	ENSG00000185686/ENSG00000145780/ENSG00000132003/ENSG00000154582/ENSG00000169018/ENSG00000108094/ENSG00000203995/ENSG00000062725/ENSG00000162378
GO:0005892	GO:0005892	acetylcholine-gated channel complex	16	0.583663	1.81122	0.00600356	0.0366117	0.0268715	3330	tags=44%, list=8%, signal=40%	ENSG00000101204/ENSG00000160716/ENSG00000117971/ENSG00000169684/ENSG00000120903/ENSG00000164506/ENSG00000138435
GO:0005852	GO:0005852	eukaryotic translation initiation factor 3 complex	15	0.606079	1.84187	0.00601352	0.0366117	0.0268715	5554	tags=40%, list=14%, signal=34%	ENSG00000147677/ENSG00000104408/ENSG00000104131/ENSG00000205609/ENSG00000184110/ENSG00000100129
GO:0000235	GO:0000235	astral microtubule	11	0.660694	1.88356	0.00643108	0.038401	0.0281848	6891	tags=55%, list=17%, signal=45%	ENSG00000154429/ENSG00000164114/ENSG00000101367/ENSG00000121621/ENSG00000165169/ENSG00000007168
GO:0005818	GO:0005818	aster	11	0.660694	1.88356	0.00643108	0.038401	0.0281848	6891	tags=55%, list=17%, signal=45%	ENSG00000154429/ENSG00000164114/ENSG00000101367/ENSG00000121621/ENSG00000165169/ENSG00000007168
GO:0031091	GO:0031091	platelet alpha granule	90	0.299836	1.45375	0.00705531	0.0417271	0.0306261	6257	tags=27%, list=16%, signal=23%	ENSG00000171557/ENSG00000171564/ENSG00000077522/ENSG00000138798/ENSG00000156535/ENSG00000084234/ENSG00000122194/ENSG00000145192/ENSG00000155008/ENSG00000153310/ENSG00000124333/ENSG00000186340/ENSG00000171560/ENSG00000112419/ENSG00000113905/ENSG00000142192/ENSG00000112715/ENSG00000092969/ENSG00000163631/ENSG00000113889/ENSG00000145685/ENSG00000010278/ENSG00000115414/ENSG00000149925
GO:0031228	GO:0031228	intrinsic component of Golgi membrane	66	0.336561	1.54726	0.00745869	0.0436062	0.0320052	9217	tags=48%, list=23%, signal=37%	ENSG00000167080/ENSG00000132872/ENSG00000078124/ENSG00000135454/ENSG00000147533/ENSG00000188706/ENSG00000180776/ENSG00000102100/ENSG00000177076/ENSG00000113719/ENSG00000169826/ENSG00000198964/ENSG00000102383/ENSG00000017260/ENSG00000135702/ENSG00000124786/ENSG00000138459/ENSG00000157593/ENSG00000117620/ENSG00000134049/ENSG00000144043/ENSG00000121073/ENSG00000164023/ENSG00000106692/ENSG00000165661…
GO:0099634	GO:0099634	postsynaptic specialization membrane	116	0.28917	1.42073	0.00751346	0.0436062	0.0320052	4599	tags=24%, list=12%, signal=21%	ENSG00000011677/ENSG00000160716/ENSG00000077522/ENSG00000170835/ENSG00000116329/ENSG00000178235/ENSG00000146938/ENSG00000168539/ENSG00000166862/ENSG00000186297/ENSG00000152822/ENSG00000040731/ENSG00000136379/ENSG00000109971/ENSG00000237515/ENSG00000150672/ENSG00000156642/ENSG00000120251/ENSG00000105464/ENSG00000145864/ENSG00000138435/ENSG00000166342/ENSG00000176204/ENSG00000107362/ENSG00000152208…
GO:1904115	GO:1904115	axon cytoplasm	63	0.352854	1.57312	0.00806606	0.0459803	0.0337477	8558	tags=52%, list=22%, signal=41%	ENSG00000155980/ENSG00000100644/ENSG00000103723/ENSG00000150672/ENSG00000198836/ENSG00000170759/ENSG00000154277/ENSG00000177879/ENSG00000132842/ENSG00000072803/ENSG00000102401/ENSG00000070718/ENSG00000054523/ENSG00000135049/ENSG00000090889/ENSG00000131437/ENSG00000041353/ENSG00000185009/ENSG00000080371/ENSG00000134108/ENSG00000021574/ENSG00000101350/ENSG00000007168/ENSG00000173805/ENSG00000131966…
GO:0031306	GO:0031306	intrinsic component of mitochondrial outer membrane	24	0.470193	1.64129	0.00807062	0.0459803	0.0337477	5194	tags=33%, list=13%, signal=29%	ENSG00000104381/ENSG00000176171/ENSG00000110090/ENSG00000171109/ENSG00000102401/ENSG00000126858/ENSG00000173726/ENSG00000134278
GO:0030173	GO:0030173	integral component of Golgi membrane	61	0.350949	1.54014	0.00846278	0.0477762	0.0350659	9495	tags=49%, list=24%, signal=37%	ENSG00000167080/ENSG00000132872/ENSG00000078124/ENSG00000135454/ENSG00000180776/ENSG00000102100/ENSG00000177076/ENSG00000113719/ENSG00000169826/ENSG00000198964/ENSG00000102383/ENSG00000017260/ENSG00000124786/ENSG00000138459/ENSG00000157593/ENSG00000117620/ENSG00000134049/ENSG00000144043/ENSG00000121073/ENSG00000164023/ENSG00000106692/ENSG00000165661/ENSG00000171928/ENSG00000176087/ENSG00000143641…
GO:0003823	GO:0003823	antigen binding	157	-0.665159	-2.08995	1e-10	5.5e-08	4.35789e-08	7674	tags=66%, list=19%, signal=54%	ENSG00000211598/ENSG00000211663/ENSG00000243772/ENSG00000021488/ENSG00000204632/ENSG00000211662/ENSG00000198502/ENSG00000085265/ENSG00000166482/ENSG00000243466/ENSG00000179344/ENSG00000101017/ENSG00000251546/ENSG00000211651/ENSG00000223648/ENSG00000211799/ENSG00000211957/ENSG00000168685/ENSG00000205809/ENSG00000132465/ENSG00000239975/ENSG00000278857/ENSG00000223865/ENSG00000276775/ENSG00000211892…
GO:0034987	GO:0034987	immunoglobulin receptor binding	66	-0.722177	-2.14062	1e-10	5.5e-08	4.35789e-08	6353	tags=71%, list=16%, signal=60%	ENSG00000223648/ENSG00000211957/ENSG00000132465/ENSG00000276775/ENSG00000211892/ENSG00000211964/ENSG00000211955/ENSG00000224373/ENSG00000211944/ENSG00000211970/ENSG00000211976/ENSG00000224650/ENSG00000211956/ENSG00000211959/ENSG00000211890/ENSG00000211895/ENSG00000211937/ENSG00000211973/ENSG00000280411/ENSG00000211938/ENSG00000211679/ENSG00000211979/ENSG00000211893/ENSG00000211677/ENSG00000211965…
GO:0008135	GO:0008135	translation factor activity, RNA binding	81	0.521386	2.34862	3.04138e-09	1.11517e-06	8.83601e-07	8867	tags=49%, list=22%, signal=38%	ENSG00000175766/ENSG00000147677/ENSG00000104408/ENSG00000104131/ENSG00000120705/ENSG00000205609/ENSG00000123908/ENSG00000067248/ENSG00000103342/ENSG00000168827/ENSG00000125977/ENSG00000134001/ENSG00000140598/ENSG00000151247/ENSG00000184110/ENSG00000089154/ENSG00000173674/ENSG00000139726/ENSG00000107864/ENSG00000180574/ENSG00000100129/ENSG00000085760/ENSG00000163577/ENSG00000100664/ENSG00000101210…
GO:0090079	GO:0090079	translation regulator activity, nucleic acid binding	100	0.474464	2.34417	7.79085e-09	2.14248e-06	1.69759e-06	8867	tags=49%, list=22%, signal=38%	ENSG00000175766/ENSG00000101489/ENSG00000070756/ENSG00000147677/ENSG00000104408/ENSG00000124374/ENSG00000182199/ENSG00000104131/ENSG00000120705/ENSG00000205609/ENSG00000123908/ENSG00000067248/ENSG00000103342/ENSG00000168827/ENSG00000125977/ENSG00000134001/ENSG00000140598/ENSG00000228716/ENSG00000151247/ENSG00000184110/ENSG00000172239/ENSG00000089154/ENSG00000173674/ENSG00000139726/ENSG00000107864…
GO:0015294	GO:0015294	solute:cation symporter activity	102	0.459399	2.22585	1.71916e-08	3.78216e-06	2.99677e-06	4389	tags=31%, list=11%, signal=28%	ENSG00000256870/ENSG00000142319/ENSG00000132164/ENSG00000115665/ENSG00000072041/ENSG00000088386/ENSG00000148942/ENSG00000196517/ENSG00000146039/ENSG00000074803/ENSG00000156222/ENSG00000105143/ENSG00000182902/ENSG00000168389/ENSG00000186335/ENSG00000100170/ENSG00000158296/ENSG00000131183/ENSG00000007216/ENSG00000197496/ENSG00000111371/ENSG00000145283/ENSG00000163406/ENSG00000022567/ENSG00000119899…
GO:0003743	GO:0003743	translation initiation factor activity	50	0.599327	2.47655	4.93786e-08	9.05274e-06	7.17289e-06	8480	tags=50%, list=21%, signal=39%	ENSG00000175766/ENSG00000147677/ENSG00000104408/ENSG00000104131/ENSG00000205609/ENSG00000123908/ENSG00000067248/ENSG00000125977/ENSG00000134001/ENSG00000151247/ENSG00000184110/ENSG00000173674/ENSG00000139726/ENSG00000180574/ENSG00000100129/ENSG00000085760/ENSG00000100664/ENSG00000114867/ENSG00000130741/ENSG00000110321/ENSG00000121022/ENSG00000070785/ENSG00000232119/ENSG00000144895/ENSG00000158417
GO:0140101	GO:0140101	catalytic activity, acting on a tRNA	124	0.401618	1.93496	2.28405e-07	3.58922e-05	2.8439e-05	12339	tags=61%, list=31%, signal=42%	ENSG00000136628/ENSG00000183665/ENSG00000113407/ENSG00000137513/ENSG00000067704/ENSG00000196305/ENSG00000178718/ENSG00000090861/ENSG00000106105/ENSG00000117593/ENSG00000124787/ENSG00000129480/ENSG00000166986/ENSG00000037474/ENSG00000134684/ENSG00000141378/ENSG00000174173/ENSG00000104356/ENSG00000133706/ENSG00000134077/ENSG00000169570/ENSG00000139131/ENSG00000188917/ENSG00000134440/ENSG00000247626…
GO:0015370	GO:0015370	solute:sodium symporter activity	71	0.473047	2.06072	9.72752e-07	0.000130096	0.00010308	4389	tags=34%, list=11%, signal=30%	ENSG00000256870/ENSG00000142319/ENSG00000132164/ENSG00000115665/ENSG00000072041/ENSG00000148942/ENSG00000196517/ENSG00000146039/ENSG00000074803/ENSG00000156222/ENSG00000105143/ENSG00000168389/ENSG00000100170/ENSG00000158296/ENSG00000131183/ENSG00000007216/ENSG00000111371/ENSG00000145283/ENSG00000168575/ENSG00000137860/ENSG00000064651/ENSG00000105641/ENSG00000134294/ENSG00000070915
GO:0008094	GO:0008094	ATP-dependent activity, acting on DNA	108	0.400842	1.9677	1.17658e-06	0.000130096	0.00010308	11133	tags=57%, list=28%, signal=41%	ENSG00000136982/ENSG00000104738/ENSG00000112249/ENSG00000133119/ENSG00000116254/ENSG00000071794/ENSG00000145907/ENSG00000144045/ENSG00000004700/ENSG00000197275/ENSG00000197299/ENSG00000116062/ENSG00000051180/ENSG00000186871/ENSG00000095002/ENSG00000196535/ENSG00000020922/ENSG00000073111/ENSG00000076003/ENSG00000215301/ENSG00000163104/ENSG00000225830/ENSG00000135829/ENSG00000134452/ENSG00000163918…
GO:0019829	GO:0019829	ATPase-coupled cation transmembrane transporter activity	46	0.568458	2.30188	1.18269e-06	0.000130096	0.00010308	7378	tags=50%, list=19%, signal=41%	ENSG00000187527/ENSG00000127249/ENSG00000067842/ENSG00000105409/ENSG00000186009/ENSG00000143882/ENSG00000133657/ENSG00000174437/ENSG00000064270/ENSG00000155097/ENSG00000163399/ENSG00000110955/ENSG00000114573/ENSG00000058668/ENSG00000143153/ENSG00000047249/ENSG00000017260/ENSG00000132681/ENSG00000069849/ENSG00000165240/ENSG00000100554/ENSG00000069431/ENSG00000070961
GO:0005048	GO:0005048	signal sequence binding	47	0.534894	2.18383	2.41328e-06	0.000241328	0.000191215	9193	tags=62%, list=23%, signal=47%	ENSG00000185467/ENSG00000114757/ENSG00000103888/ENSG00000154174/ENSG00000100196/ENSG00000102753/ENSG00000136240/ENSG00000158553/ENSG00000100883/ENSG00000182481/ENSG00000114030/ENSG00000139496/ENSG00000124789/ENSG00000112357/ENSG00000173726/ENSG00000166197/ENSG00000158882/ENSG00000025800/ENSG00000186432/ENSG00000065150/ENSG00000058262/ENSG00000006125/ENSG00000083312/ENSG00000196313/ENSG00000110713…
GO:0042626	GO:0042626	ATPase-coupled transmembrane transporter activity	108	0.387832	1.90384	3.41162e-06	0.000312732	0.000247791	7485	tags=42%, list=19%, signal=34%	ENSG00000187527/ENSG00000023839/ENSG00000127249/ENSG00000179869/ENSG00000144452/ENSG00000067842/ENSG00000121270/ENSG00000140798/ENSG00000105409/ENSG00000186009/ENSG00000155850/ENSG00000143882/ENSG00000133657/ENSG00000174437/ENSG00000064270/ENSG00000155097/ENSG00000125257/ENSG00000163399/ENSG00000135776/ENSG00000110955/ENSG00000147606/ENSG00000170615/ENSG00000112053/ENSG00000143921/ENSG00000114573…
GO:0004812	GO:0004812	aminoacyl-tRNA ligase activity	41	0.551696	2.15156	5.87246e-06	0.000461408	0.000365594	6852	tags=44%, list=17%, signal=36%	ENSG00000136628/ENSG00000113407/ENSG00000137513/ENSG00000067704/ENSG00000196305/ENSG00000090861/ENSG00000106105/ENSG00000117593/ENSG00000166986/ENSG00000134684/ENSG00000133706/ENSG00000139131/ENSG00000134440/ENSG00000247626/ENSG00000113643/ENSG00000103356/ENSG00000115866/ENSG00000116120
GO:0016875	GO:0016875	ligase activity, forming carbon-oxygen bonds	41	0.551696	2.15156	5.87246e-06	0.000461408	0.000365594	6852	tags=44%, list=17%, signal=36%	ENSG00000136628/ENSG00000113407/ENSG00000137513/ENSG00000067704/ENSG00000196305/ENSG00000090861/ENSG00000106105/ENSG00000117593/ENSG00000166986/ENSG00000134684/ENSG00000133706/ENSG00000139131/ENSG00000134440/ENSG00000247626/ENSG00000113643/ENSG00000103356/ENSG00000115866/ENSG00000116120
GO:0140142	GO:0140142	nucleocytoplasmic carrier activity	31	0.623707	2.2823	8.1826e-06	0.000540876	0.00042856	10205	tags=71%, list=26%, signal=53%	ENSG00000185467/ENSG00000124207/ENSG00000102753/ENSG00000182481/ENSG00000114030/ENSG00000086200/ENSG00000132341/ENSG00000124571/ENSG00000025800/ENSG00000132953/ENSG00000186432/ENSG00000065150/ENSG00000198700/ENSG00000064419/ENSG00000169371/ENSG00000082898/ENSG00000083312/ENSG00000149196/ENSG00000108424/ENSG00000105576/ENSG00000204764/ENSG00000136243
GO:0005221	GO:0005221	intracellular cyclic nucleotide activated cation channel activity	11	0.857167	2.46409	8.35899e-06	0.000540876	0.00042856	1243	tags=55%, list=3%, signal=53%	ENSG00000183862/ENSG00000070729/ENSG00000138622/ENSG00000198515/ENSG00000114757/ENSG00000164588
GO:0043855	GO:0043855	cyclic nucleotide-gated ion channel activity	11	0.857167	2.46409	8.35899e-06	0.000540876	0.00042856	1243	tags=55%, list=3%, signal=53%	ENSG00000183862/ENSG00000070729/ENSG00000138622/ENSG00000198515/ENSG00000114757/ENSG00000164588
GO:0016779	GO:0016779	nucleotidyltransferase activity	127	0.367944	1.73933	9.4952e-06	0.000580262	0.000459767	9151	tags=50%, list=23%, signal=38%	ENSG00000198682/ENSG00000157064/ENSG00000174016/ENSG00000147669/ENSG00000121274/ENSG00000158246/ENSG00000198855/ENSG00000013503/ENSG00000102230/ENSG00000110958/ENSG00000169764/ENSG00000111331/ENSG00000117143/ENSG00000138035/ENSG00000107951/ENSG00000214960/ENSG00000077514/ENSG00000198056/ENSG00000047315/ENSG00000161217/ENSG00000111335/ENSG00000147601/ENSG00000111726/ENSG00000089127/ENSG00000107447…
GO:0042826	GO:0042826	histone deacetylase binding	119	0.355587	1.81173	2.02387e-05	0.00117172	0.000928403	9110	tags=39%, list=23%, signal=30%	ENSG00000197172/ENSG00000221867/ENSG00000213401/ENSG00000173404/ENSG00000147381/ENSG00000198681/ENSG00000185247/ENSG00000137270/ENSG00000100644/ENSG00000100916/ENSG00000185345/ENSG00000167005/ENSG00000008405/ENSG00000088305/ENSG00000065060/ENSG00000182481/ENSG00000096384/ENSG00000167085/ENSG00000143799/ENSG00000080824/ENSG00000166913/ENSG00000183337/ENSG00000112312/ENSG00000155545/ENSG00000068305…
GO:0070279	GO:0070279	vitamin B6 binding	55	0.481723	1.98321	2.3775e-05	0.00130762	0.00103609	6470	tags=47%, list=16%, signal=40%	ENSG00000132437/ENSG00000172482/ENSG00000128683/ENSG00000136750/ENSG00000115919/ENSG00000166123/ENSG00000198650/ENSG00000160200/ENSG00000108439/ENSG00000135069/ENSG00000147471/ENSG00000075643/ENSG00000182199/ENSG00000120053/ENSG00000100596/ENSG00000065154/ENSG00000186205/ENSG00000179889/ENSG00000125166/ENSG00000135094/ENSG00000172296/ENSG00000090054/ENSG00000163631/ENSG00000116761/ENSG00000117791…
GO:0000149	GO:0000149	SNARE binding	109	0.361002	1.76121	2.55752e-05	0.00133966	0.00106147	9944	tags=47%, list=25%, signal=35%	ENSG00000145920/ENSG00000145087/ENSG00000132872/ENSG00000213023/ENSG00000129990/ENSG00000019505/ENSG00000178750/ENSG00000113615/ENSG00000073969/ENSG00000103769/ENSG00000164506/ENSG00000166900/ENSG00000198382/ENSG00000124333/ENSG00000073921/ENSG00000176986/ENSG00000184178/ENSG00000150961/ENSG00000168118/ENSG00000166569/ENSG00000105186/ENSG00000130477/ENSG00000086712/ENSG00000134265/ENSG00000138802…
GO:0030170	GO:0030170	pyridoxal phosphate binding	54	0.490518	2.05232	2.70541e-05	0.00135271	0.00107181	6470	tags=48%, list=16%, signal=40%	ENSG00000132437/ENSG00000172482/ENSG00000128683/ENSG00000136750/ENSG00000115919/ENSG00000166123/ENSG00000198650/ENSG00000160200/ENSG00000108439/ENSG00000135069/ENSG00000147471/ENSG00000075643/ENSG00000182199/ENSG00000120053/ENSG00000100596/ENSG00000065154/ENSG00000186205/ENSG00000179889/ENSG00000125166/ENSG00000135094/ENSG00000172296/ENSG00000090054/ENSG00000163631/ENSG00000116761/ENSG00000117791…
GO:0003678	GO:0003678	DNA helicase activity	70	0.422931	1.81558	2.93348e-05	0.00137949	0.00109303	10039	tags=53%, list=25%, signal=40%	ENSG00000136982/ENSG00000104738/ENSG00000112249/ENSG00000133119/ENSG00000116254/ENSG00000145907/ENSG00000144045/ENSG00000004700/ENSG00000197275/ENSG00000197299/ENSG00000051180/ENSG00000186871/ENSG00000020922/ENSG00000073111/ENSG00000076003/ENSG00000215301/ENSG00000163104/ENSG00000135829/ENSG00000134452/ENSG00000163918/ENSG00000138346/ENSG00000177200/ENSG00000125885/ENSG00000156502/ENSG00000174953…
GO:0051082	GO:0051082	unfolded protein binding	111	0.362891	1.78662	3.1352e-05	0.00137949	0.00109303	10286	tags=57%, list=26%, signal=42%	ENSG00000134398/ENSG00000127022/ENSG00000109971/ENSG00000149428/ENSG00000113013/ENSG00000144381/ENSG00000120438/ENSG00000074695/ENSG00000150753/ENSG00000109846/ENSG00000110958/ENSG00000164953/ENSG00000155393/ENSG00000166855/ENSG00000140403/ENSG00000141385/ENSG00000164284/ENSG00000183199/ENSG00000156261/ENSG00000069345/ENSG00000096384/ENSG00000115484/ENSG00000136731/ENSG00000166226/ENSG00000068912…
GO:0099094	GO:0099094	ligand-gated cation channel activity	111	0.362637	1.78537	3.1352e-05	0.00137949	0.00109303	3330	tags=21%, list=8%, signal=19%	ENSG00000183862/ENSG00000101204/ENSG00000260458/ENSG00000160716/ENSG00000256394/ENSG00000117971/ENSG00000070729/ENSG00000168135/ENSG00000198626/ENSG00000138622/ENSG00000198515/ENSG00000169684/ENSG00000114757/ENSG00000055118/ENSG00000164588/ENSG00000187848/ENSG00000159197/ENSG00000120903/ENSG00000164418/ENSG00000120251/ENSG00000105464/ENSG00000096433/ENSG00000138435
GO:0000049	GO:0000049	tRNA binding	72	0.425981	1.84087	3.49358e-05	0.00147805	0.00117113	9242	tags=46%, list=23%, signal=35%	ENSG00000113407/ENSG00000184575/ENSG00000067704/ENSG00000196305/ENSG00000090861/ENSG00000117593/ENSG00000129480/ENSG00000166986/ENSG00000037474/ENSG00000134684/ENSG00000174173/ENSG00000139131/ENSG00000113643/ENSG00000180574/ENSG00000164022/ENSG00000128829/ENSG00000124571/ENSG00000072756/ENSG00000103356/ENSG00000121486/ENSG00000137760/ENSG00000130741/ENSG00000196449/ENSG00000145331/ENSG00000113048…
GO:0016410	GO:0016410	N-acyltransferase activity	90	0.379551	1.76034	3.94598e-05	0.00160762	0.00127379	5624	tags=30%, list=14%, signal=26%	ENSG00000156689/ENSG00000203972/ENSG00000156269/ENSG00000167011/ENSG00000188089/ENSG00000100522/ENSG00000255151/ENSG00000184788/ENSG00000166840/ENSG00000127252/ENSG00000172292/ENSG00000133328/ENSG00000171320/ENSG00000121579/ENSG00000083168/ENSG00000143418/ENSG00000125484/ENSG00000164134/ENSG00000176485/ENSG00000134852/ENSG00000139618/ENSG00000111300/ENSG00000124422/ENSG00000139977/ENSG00000124151…
GO:0019783	GO:0019783	ubiquitin-like protein-specific protease activity	103	0.364392	1.77351	5.18656e-05	0.00203758	0.00161446	10006	tags=51%, list=25%, signal=39%	ENSG00000134588/ENSG00000155100/ENSG00000147677/ENSG00000121644/ENSG00000116750/ENSG00000180667/ENSG00000124486/ENSG00000154277/ENSG00000128923/ENSG00000152484/ENSG00000170185/ENSG00000148481/ENSG00000124422/ENSG00000058056/ENSG00000138592/ENSG00000175073/ENSG00000115233/ENSG00000166348/ENSG00000185515/ENSG00000138663/ENSG00000166192/ENSG00000048028/ENSG00000103194/ENSG00000153975/ENSG00000132952…
GO:0030374	GO:0030374	nuclear receptor coactivator activity	56	0.429358	1.75245	0.0001281	0.00476918	0.00377883	9492	tags=41%, list=24%, signal=31%	ENSG00000077522/ENSG00000109819/ENSG00000155846/ENSG00000125686/ENSG00000147526/ENSG00000120533/ENSG00000111912/ENSG00000140396/ENSG00000124422/ENSG00000180182/ENSG00000164758/ENSG00000113300/ENSG00000124151/ENSG00000014824/ENSG00000143164/ENSG00000144747/ENSG00000060339/ENSG00000008838/ENSG00000108175/ENSG00000063978/ENSG00000108510/ENSG00000130402/ENSG00000142453
GO:0050661	GO:0050661	NADP binding	52	0.44806	1.85949	0.000133471	0.00476918	0.00377883	7539	tags=42%, list=19%, signal=34%	ENSG00000131781/ENSG00000103316/ENSG00000065833/ENSG00000010932/ENSG00000145545/ENSG00000104687/ENSG00000172893/ENSG00000160211/ENSG00000255346/ENSG00000113161/ENSG00000138413/ENSG00000106049/ENSG00000159231/ENSG00000124275/ENSG00000228716/ENSG00000112992/ENSG00000111640/ENSG00000104325/ENSG00000143815/ENSG00000149809/ENSG00000127948/ENSG00000089250
GO:0050660	GO:0050660	flavin adenine dinucleotide binding	85	0.378265	1.71908	0.000134404	0.00476918	0.00377883	9230	tags=49%, list=23%, signal=38%	ENSG00000117009/ENSG00000104549/ENSG00000131781/ENSG00000140374/ENSG00000100033/ENSG00000010932/ENSG00000104687/ENSG00000198431/ENSG00000255346/ENSG00000197930/ENSG00000166816/ENSG00000116133/ENSG00000165097/ENSG00000091140/ENSG00000008405/ENSG00000124275/ENSG00000168306/ENSG00000151498/ENSG00000117054/ENSG00000121350/ENSG00000100350/ENSG00000156709/ENSG00000171503/ENSG00000124588/ENSG00000128928…
GO:0005343	GO:0005343	organic acid:sodium symporter activity	29	0.586281	2.09812	0.000139766	0.00480446	0.00380678	2437	tags=34%, list=6%, signal=32%	ENSG00000256870/ENSG00000132164/ENSG00000072041/ENSG00000148942/ENSG00000196517/ENSG00000105143/ENSG00000158296/ENSG00000007216/ENSG00000111371/ENSG00000145283
GO:0005546	GO:0005546	phosphatidylinositol-4,5-bisphosphate binding	79	0.382823	1.72198	0.000148775	0.00485485	0.00384671	8174	tags=42%, list=21%, signal=33%	ENSG00000077522/ENSG00000129990/ENSG00000161905/ENSG00000175318/ENSG00000188089/ENSG00000149596/ENSG00000127831/ENSG00000178171/ENSG00000137561/ENSG00000089169/ENSG00000139151/ENSG00000182621/ENSG00000169933/ENSG00000178996/ENSG00000147697/ENSG00000073921/ENSG00000132613/ENSG00000137501/ENSG00000151239/ENSG00000182718/ENSG00000115561/ENSG00000006747/ENSG00000150455/ENSG00000116141/ENSG00000130703…
GO:0050840	GO:0050840	extracellular matrix binding	56	0.425502	1.73671	0.000150059	0.00485485	0.00384671	5340	tags=29%, list=13%, signal=25%	ENSG00000135413/ENSG00000164690/ENSG00000112414/ENSG00000168615/ENSG00000143369/ENSG00000187908/ENSG00000205336/ENSG00000060718/ENSG00000150093/ENSG00000164171/ENSG00000118785/ENSG00000131981/ENSG00000138448/ENSG00000182718/ENSG00000112715/ENSG00000112562
GO:0015095	GO:0015095	magnesium ion transmembrane transporter activity	17	0.690648	2.22914	0.00016077	0.00505277	0.00400354	6444	tags=53%, list=16%, signal=44%	ENSG00000163293/ENSG00000104361/ENSG00000136052/ENSG00000169446/ENSG00000140157/ENSG00000102158/ENSG00000124532/ENSG00000001461/ENSG00000170113
GO:0043531	GO:0043531	ADP binding	37	0.511796	1.89418	0.000177146	0.00531989	0.00421519	8451	tags=62%, list=21%, signal=49%	ENSG00000170950/ENSG00000065833/ENSG00000143632/ENSG00000102144/ENSG00000169860/ENSG00000163399/ENSG00000110172/ENSG00000001084/ENSG00000116062/ENSG00000095002/ENSG00000196535/ENSG00000100335/ENSG00000182890/ENSG00000101986/ENSG00000181929/ENSG00000095777/ENSG00000148672/ENSG00000106617/ENSG00000120868/ENSG00000178607/ENSG00000165280/ENSG00000196586/ENSG00000160179
GO:0017056	GO:0017056	structural constituent of nuclear pore	25	0.60797	2.12588	0.000178942	0.00531989	0.00421519	9740	tags=64%, list=25%, signal=48%	ENSG00000113569/ENSG00000198088/ENSG00000155561/ENSG00000158553/ENSG00000069248/ENSG00000139496/ENSG00000124789/ENSG00000058804/ENSG00000102900/ENSG00000108559/ENSG00000138750/ENSG00000196313/ENSG00000110713/ENSG00000163002/ENSG00000047410/ENSG00000111581
GO:0019905	GO:0019905	syntaxin binding	73	0.399675	1.73385	0.000203129	0.00559122	0.00443017	9886	tags=45%, list=25%, signal=34%	ENSG00000145920/ENSG00000145087/ENSG00000132872/ENSG00000213023/ENSG00000129990/ENSG00000073969/ENSG00000103769/ENSG00000164506/ENSG00000124333/ENSG00000184178/ENSG00000168118/ENSG00000166569/ENSG00000130477/ENSG00000086712/ENSG00000134265/ENSG00000143952/ENSG00000092108/ENSG00000165029/ENSG00000135823/ENSG00000170348/ENSG00000147642/ENSG00000198722/ENSG00000104164/ENSG00000223501/ENSG00000049245…
GO:0005249	GO:0005249	voltage-gated potassium channel activity	88	0.355482	1.6319	0.000206311	0.00559122	0.00443017	3984	tags=25%, list=10%, signal=23%	ENSG00000260458/ENSG00000182255/ENSG00000169427/ENSG00000168135/ENSG00000138622/ENSG00000075043/ENSG00000164794/ENSG00000026559/ENSG00000055118/ENSG00000164588/ENSG00000171126/ENSG00000159197/ENSG00000184611/ENSG00000162494/ENSG00000182674/ENSG00000173826/ENSG00000171303/ENSG00000170745/ENSG00000117013/ENSG00000162763/ENSG00000135750/ENSG00000151079
GO:0015464	GO:0015464	acetylcholine receptor activity	22	0.629024	2.12597	0.000207295	0.00559122	0.00443017	1945	tags=36%, list=5%, signal=35%	ENSG00000101204/ENSG00000160716/ENSG00000117971/ENSG00000169684/ENSG00000168539/ENSG00000133019/ENSG00000101180/ENSG00000120903
GO:0051721	GO:0051721	protein phosphatase 2A binding	31	0.549764	2.01172	0.0002084	0.00559122	0.00443017	8078	tags=39%, list=20%, signal=31%	ENSG00000142319/ENSG00000155897/ENSG00000187840/ENSG00000113161/ENSG00000115808/ENSG00000128989/ENSG00000120539/ENSG00000196792/ENSG00000136848/ENSG00000196396/ENSG00000116698/ENSG00000214517
GO:0008376	GO:0008376	acetylgalactosaminyltransferase activity	34	0.539218	1.9659	0.000229614	0.00598317	0.00474073	6422	tags=41%, list=16%, signal=35%	ENSG00000167080/ENSG00000185274/ENSG00000119514/ENSG00000135454/ENSG00000115339/ENSG00000109586/ENSG00000144278/ENSG00000169826/ENSG00000175164/ENSG00000158089/ENSG00000162885/ENSG00000164574/ENSG00000141429/ENSG00000169255
GO:0005496	GO:0005496	steroid binding	96	0.340256	1.63942	0.000233887	0.00598317	0.00474073	8527	tags=47%, list=22%, signal=37%	ENSG00000170099/ENSG00000110243/ENSG00000102003/ENSG00000109193/ENSG00000007062/ENSG00000188582/ENSG00000131748/ENSG00000105409/ENSG00000175336/ENSG00000122787/ENSG00000213585/ENSG00000163399/ENSG00000138760/ENSG00000155066/ENSG00000057252/ENSG00000147475/ENSG00000101856/ENSG00000164040/ENSG00000141458/ENSG00000091039/ENSG00000165637/ENSG00000082175/ENSG00000110048/ENSG00000116171/ENSG00000119715…
GO:0015662	GO:0015662	P-type ion transporter activity	21	0.629351	2.12985	0.00025319	0.00617023	0.00488894	7974	tags=71%, list=20%, signal=57%	ENSG00000067842/ENSG00000105409/ENSG00000186009/ENSG00000174437/ENSG00000064270/ENSG00000125257/ENSG00000163399/ENSG00000058668/ENSG00000143153/ENSG00000017260/ENSG00000132681/ENSG00000069849/ENSG00000165240/ENSG00000070961/ENSG00000075673
GO:0140358	GO:0140358	P-type transmembrane transporter activity	21	0.629351	2.12985	0.00025319	0.00617023	0.00488894	7974	tags=71%, list=20%, signal=57%	ENSG00000067842/ENSG00000105409/ENSG00000186009/ENSG00000174437/ENSG00000064270/ENSG00000125257/ENSG00000163399/ENSG00000058668/ENSG00000143153/ENSG00000017260/ENSG00000132681/ENSG00000069849/ENSG00000165240/ENSG00000070961/ENSG00000075673
GO:0003725	GO:0003725	double-stranded RNA binding	73	0.394755	1.7125	0.000258028	0.00617023	0.00488894	10171	tags=56%, list=26%, signal=42%	ENSG00000072274/ENSG00000147649/ENSG00000165732/ENSG00000141367/ENSG00000144381/ENSG00000185736/ENSG00000123908/ENSG00000111331/ENSG00000040341/ENSG00000123416/ENSG00000096384/ENSG00000124214/ENSG00000056097/ENSG00000111335/ENSG00000115267/ENSG00000137628/ENSG00000089127/ENSG00000109606/ENSG00000135829/ENSG00000056586/ENSG00000072858/ENSG00000005100/ENSG00000113360/ENSG00000079785/ENSG00000156502…
GO:0003688	GO:0003688	DNA replication origin binding	16	0.704331	2.22235	0.000276011	0.006325	0.00501158	8086	tags=75%, list=20%, signal=60%	ENSG00000144381/ENSG00000065328/ENSG00000073111/ENSG00000094804/ENSG00000135829/ENSG00000093009/ENSG00000135336/ENSG00000164815/ENSG00000085840/ENSG00000115947/ENSG00000101868/ENSG00000136504
GO:0101005	GO:0101005	deubiquitinase activity	92	0.355755	1.67238	0.000280941	0.006325	0.00501158	10006	tags=50%, list=25%, signal=37%	ENSG00000134588/ENSG00000155100/ENSG00000147677/ENSG00000121644/ENSG00000116750/ENSG00000180667/ENSG00000124486/ENSG00000154277/ENSG00000128923/ENSG00000152484/ENSG00000170185/ENSG00000148481/ENSG00000124422/ENSG00000058056/ENSG00000138592/ENSG00000175073/ENSG00000115233/ENSG00000166348/ENSG00000185515/ENSG00000048028/ENSG00000103194/ENSG00000153975/ENSG00000162607/ENSG00000036672/ENSG00000109189…
GO:1901505	GO:1901505	carbohydrate derivative transmembrane transporter activity	53	0.422426	1.76585	0.00028175	0.006325	0.00501158	7180	tags=43%, list=18%, signal=36%	ENSG00000146039/ENSG00000156222/ENSG00000168389/ENSG00000100170/ENSG00000112759/ENSG00000169241/ENSG00000119899/ENSG00000102100/ENSG00000137860/ENSG00000005022/ENSG00000124786/ENSG00000101986/ENSG00000174669/ENSG00000138459/ENSG00000160190/ENSG00000157593/ENSG00000117620/ENSG00000137700/ENSG00000116704/ENSG00000169359/ENSG00000121073/ENSG00000134955/ENSG00000100372
GO:0030371	GO:0030371	translation repressor activity	25	0.590247	2.06391	0.000295808	0.00647912	0.00513369	7440	tags=56%, list=19%, signal=46%	ENSG00000188613/ENSG00000101489/ENSG00000187840/ENSG00000124374/ENSG00000182199/ENSG00000136381/ENSG00000228716/ENSG00000107864/ENSG00000206557/ENSG00000179134/ENSG00000148730/ENSG00000120727/ENSG00000185129/ENSG00000113742
GO:0004659	GO:0004659	prenyltransferase activity	17	0.67347	2.1737	0.000300396	0.00647912	0.00513369	11000	tags=82%, list=28%, signal=60%	ENSG00000079459/ENSG00000164494/ENSG00000153989/ENSG00000160752/ENSG00000148459/ENSG00000173085/ENSG00000164219/ENSG00000152904/ENSG00000188647/ENSG00000168522/ENSG00000188419/ENSG00000006695/ENSG00000117682/ENSG00000120942
GO:0008028	GO:0008028	monocarboxylic acid transmembrane transporter activity	55	0.431712	1.77732	0.000320497	0.00677975	0.0053719	3250	tags=20%, list=8%, signal=18%	ENSG00000256870/ENSG00000132164/ENSG00000148942/ENSG00000257046/ENSG00000121270/ENSG00000147100/ENSG00000168389/ENSG00000145283/ENSG00000125257/ENSG00000168679/ENSG00000134538
GO:0061608	GO:0061608	nuclear import signal receptor activity	20	0.640276	2.1235	0.00032953	0.00683929	0.00541908	9082	tags=75%, list=23%, signal=58%	ENSG00000185467/ENSG00000102753/ENSG00000182481/ENSG00000114030/ENSG00000086200/ENSG00000025800/ENSG00000186432/ENSG00000065150/ENSG00000198700/ENSG00000064419/ENSG00000169371/ENSG00000083312/ENSG00000149196/ENSG00000108424/ENSG00000105576
GO:0000339	GO:0000339	RNA cap binding	19	0.639944	2.05919	0.000356058	0.00725304	0.0057469	5771	tags=47%, list=15%, signal=40%	ENSG00000175766/ENSG00000170935/ENSG00000136937/ENSG00000123908/ENSG00000151247/ENSG00000273749/ENSG00000175324/ENSG00000082516/ENSG00000155506
GO:0046527	GO:0046527	glucosyltransferase activity	17	0.665681	2.14856	0.000375312	0.00750624	0.00594753	9420	tags=59%, list=24%, signal=45%	ENSG00000159063/ENSG00000139133/ENSG00000177628/ENSG00000136731/ENSG00000178202/ENSG00000120697/ENSG00000163754/ENSG00000175548/ENSG00000134901/ENSG00000102595
GO:0000340	GO:0000340	RNA 7-methylguanosine cap binding	12	0.753623	2.2043	0.000446356	0.00876244	0.00694287	5771	tags=58%, list=15%, signal=50%	ENSG00000175766/ENSG00000136937/ENSG00000123908/ENSG00000151247/ENSG00000273749/ENSG00000082516/ENSG00000155506
GO:1902936	GO:1902936	phosphatidylinositol bisphosphate binding	104	0.329932	1.58764	0.000454053	0.00876244	0.00694287	8174	tags=37%, list=21%, signal=29%	ENSG00000077522/ENSG00000129990/ENSG00000161905/ENSG00000175318/ENSG00000188089/ENSG00000233670/ENSG00000149596/ENSG00000127831/ENSG00000178171/ENSG00000137561/ENSG00000104341/ENSG00000089169/ENSG00000139151/ENSG00000182621/ENSG00000169933/ENSG00000177182/ENSG00000178996/ENSG00000147697/ENSG00000073921/ENSG00000132613/ENSG00000137501/ENSG00000151239/ENSG00000182718/ENSG00000115561/ENSG00000006747…
GO:0043236	GO:0043236	laminin binding	28	0.531798	1.89901	0.000532204	0.00979197	0.00775861	1093	tags=18%, list=3%, signal=17%	ENSG00000135413/ENSG00000164690/ENSG00000112414/ENSG00000168615/ENSG00000143369
GO:0030276	GO:0030276	clathrin binding	72	0.378018	1.63359	0.000533316	0.00979197	0.00775861	4865	tags=24%, list=12%, signal=21%	ENSG00000187957/ENSG00000132872/ENSG00000213023/ENSG00000129990/ENSG00000170091/ENSG00000103888/ENSG00000019505/ENSG00000141367/ENSG00000148358/ENSG00000166747/ENSG00000130164/ENSG00000073921/ENSG00000113282/ENSG00000112305/ENSG00000049283/ENSG00000087470/ENSG00000152056
GO:0004843	GO:0004843	thiol-dependent deubiquitinase	91	0.345218	1.63454	0.000534107	0.00979197	0.00775861	10006	tags=49%, list=25%, signal=37%	ENSG00000134588/ENSG00000155100/ENSG00000121644/ENSG00000116750/ENSG00000180667/ENSG00000124486/ENSG00000154277/ENSG00000128923/ENSG00000152484/ENSG00000170185/ENSG00000148481/ENSG00000124422/ENSG00000058056/ENSG00000138592/ENSG00000175073/ENSG00000115233/ENSG00000166348/ENSG00000185515/ENSG00000048028/ENSG00000103194/ENSG00000153975/ENSG00000162607/ENSG00000036672/ENSG00000109189/ENSG00000155313…
GO:0008242	GO:0008242	omega peptidase activity	104	0.326642	1.57181	0.000552225	0.00995815	0.00789029	11007	tags=56%, list=28%, signal=40%	ENSG00000134588/ENSG00000155100/ENSG00000162174/ENSG00000149435/ENSG00000121644/ENSG00000116750/ENSG00000180667/ENSG00000124486/ENSG00000154277/ENSG00000128923/ENSG00000152484/ENSG00000170185/ENSG00000167741/ENSG00000148481/ENSG00000124422/ENSG00000058056/ENSG00000137563/ENSG00000138592/ENSG00000175073/ENSG00000115233/ENSG00000166348/ENSG00000185515/ENSG00000048028/ENSG00000103194/ENSG00000153975…
GO:0031369	GO:0031369	translation initiation factor binding	33	0.505559	1.85611	0.000603347	0.0107046	0.00848169	7426	tags=48%, list=19%, signal=39%	ENSG00000131914/ENSG00000187840/ENSG00000205609/ENSG00000125977/ENSG00000151247/ENSG00000184110/ENSG00000131979/ENSG00000106638/ENSG00000155506/ENSG00000215301/ENSG00000109917/ENSG00000100664/ENSG00000148730/ENSG00000114867/ENSG00000144231/ENSG00000119401
GO:0016903	GO:0016903	oxidoreductase activity, acting on the aldehyde or oxo group of donors	43	0.465002	1.8684	0.000613256	0.0107077	0.00848415	5142	tags=42%, list=13%, signal=36%	ENSG00000198074/ENSG00000131781/ENSG00000184254/ENSG00000196344/ENSG00000064763/ENSG00000150768/ENSG00000136010/ENSG00000072210/ENSG00000181192/ENSG00000159423/ENSG00000149084/ENSG00000132746/ENSG00000091140/ENSG00000059573/ENSG00000164904/ENSG00000119711/ENSG00000143149/ENSG00000111640
GO:0008139	GO:0008139	nuclear localization sequence binding	24	0.566575	1.99511	0.000624237	0.0107291	0.00850112	9082	tags=71%, list=23%, signal=55%	ENSG00000185467/ENSG00000102753/ENSG00000158553/ENSG00000182481/ENSG00000114030/ENSG00000139496/ENSG00000124789/ENSG00000166197/ENSG00000025800/ENSG00000186432/ENSG00000065150/ENSG00000083312/ENSG00000196313/ENSG00000110713/ENSG00000089234/ENSG00000108424/ENSG00000105576
GO:0005217	GO:0005217	intracellular ligand-gated ion channel activity	29	0.54528	1.95139	0.000687954	0.0115695	0.00916701	1243	tags=24%, list=3%, signal=23%	ENSG00000183862/ENSG00000070729/ENSG00000198626/ENSG00000138622/ENSG00000198515/ENSG00000114757/ENSG00000164588
GO:0015171	GO:0015171	amino acid transmembrane transporter activity	81	0.359812	1.6208	0.000694168	0.0115695	0.00916701	4239	tags=26%, list=11%, signal=23%	ENSG00000132164/ENSG00000072041/ENSG00000196517/ENSG00000105143/ENSG00000147100/ENSG00000182902/ENSG00000139514/ENSG00000180773/ENSG00000186335/ENSG00000174899/ENSG00000174358/ENSG00000111371/ENSG00000164300/ENSG00000004864/ENSG00000105281/ENSG00000104044/ENSG00000151012/ENSG00000103064/ENSG00000103257/ENSG00000179520/ENSG00000134294
GO:0043022	GO:0043022	ribosome binding	66	0.380701	1.62434	0.000716612	0.0117653	0.00932215	9210	tags=50%, list=23%, signal=38%	ENSG00000103226/ENSG00000108588/ENSG00000185728/ENSG00000174780/ENSG00000103512/ENSG00000120705/ENSG00000126524/ENSG00000164134/ENSG00000118705/ENSG00000143183/ENSG00000134001/ENSG00000140598/ENSG00000184110/ENSG00000089154/ENSG00000107864/ENSG00000082516/ENSG00000044574/ENSG00000162972/ENSG00000163577/ENSG00000058262/ENSG00000154059/ENSG00000164327/ENSG00000153037/ENSG00000113742/ENSG00000104626…
GO:0030552	GO:0030552	cAMP binding	23	0.575011	1.99229	0.000790433	0.0127864	0.0101312	5026	tags=30%, list=13%, signal=27%	ENSG00000183862/ENSG00000070729/ENSG00000138622/ENSG00000164588/ENSG00000114302/ENSG00000112541/ENSG00000099822
GO:0032934	GO:0032934	sterol binding	58	0.390714	1.61707	0.000879146	0.0140154	0.011105	8527	tags=50%, list=22%, signal=39%	ENSG00000110243/ENSG00000102003/ENSG00000007062/ENSG00000131748/ENSG00000175336/ENSG00000213585/ENSG00000138760/ENSG00000155066/ENSG00000057252/ENSG00000147475/ENSG00000141458/ENSG00000091039/ENSG00000165637/ENSG00000110048/ENSG00000116171/ENSG00000125629/ENSG00000185920/ENSG00000144645/ENSG00000130703/ENSG00000072858/ENSG00000010270/ENSG00000165029/ENSG00000144909/ENSG00000107566/ENSG00000184792…
GO:0016866	GO:0016866	intramolecular transferase activity	26	0.538796	1.87813	0.000931811	0.0146427	0.0116021	6999	tags=46%, list=18%, signal=38%	ENSG00000134716/ENSG00000146085/ENSG00000165434/ENSG00000013375/ENSG00000129317/ENSG00000140650/ENSG00000091127/ENSG00000169299/ENSG00000171314/ENSG00000160285/ENSG00000165832/ENSG00000110060
GO:0004553	GO:0004553	hydrolase activity, hydrolyzing O-glycosyl compounds	87	0.340724	1.57339	0.00100331	0.0155443	0.0123164	6104	tags=29%, list=15%, signal=24%	ENSG00000115850/ENSG00000090402/ENSG00000151033/ENSG00000157093/ENSG00000149328/ENSG00000253203/ENSG00000103888/ENSG00000164976/ENSG00000078124/ENSG00000112893/ENSG00000116406/ENSG00000173083/ENSG00000204099/ENSG00000162688/ENSG00000170266/ENSG00000165899/ENSG00000177076/ENSG00000177628/ENSG00000227345/ENSG00000049860/ENSG00000114480/ENSG00000117151/ENSG00000166105/ENSG00000172469/ENSG00000001036
GO:0070566	GO:0070566	adenylyltransferase activity	31	0.506517	1.85347	0.00102333	0.0156342	0.0123877	8006	tags=52%, list=20%, signal=41%	ENSG00000198682/ENSG00000157064/ENSG00000174016/ENSG00000121274/ENSG00000158246/ENSG00000198855/ENSG00000111331/ENSG00000107951/ENSG00000111335/ENSG00000089127/ENSG00000072756/ENSG00000138801/ENSG00000171723/ENSG00000124217/ENSG00000090060/ENSG00000112773
GO:0005112	GO:0005112	Notch binding	24	0.551178	1.94089	0.00104687	0.0157747	0.012499	2344	tags=21%, list=6%, signal=20%	ENSG00000187957/ENSG00000090932/ENSG00000128965/ENSG00000148400/ENSG00000145794
GO:0098960	GO:0098960	postsynaptic neurotransmitter receptor activity	61	0.385397	1.59956	0.00111813	0.0164652	0.0130461	3330	tags=23%, list=8%, signal=21%	ENSG00000011677/ENSG00000101204/ENSG00000160716/ENSG00000117971/ENSG00000169684/ENSG00000168539/ENSG00000133019/ENSG00000186297/ENSG00000152822/ENSG00000101180/ENSG00000120903/ENSG00000164418/ENSG00000145864/ENSG00000138435
GO:0030551	GO:0030551	cyclic nucleotide binding	37	0.466544	1.7267	0.00112263	0.0164652	0.0130461	5026	tags=27%, list=13%, signal=24%	ENSG00000183862/ENSG00000070729/ENSG00000138622/ENSG00000198515/ENSG00000164588/ENSG00000138669/ENSG00000114302/ENSG00000112541/ENSG00000185532/ENSG00000099822
GO:0005253	GO:0005253	anion channel activity	83	0.344341	1.55519	0.00122089	0.0176708	0.0140013	4340	tags=24%, list=11%, signal=22%	ENSG00000011677/ENSG00000268089/ENSG00000137975/ENSG00000166206/ENSG00000167614/ENSG00000186297/ENSG00000127325/ENSG00000169504/ENSG00000213585/ENSG00000169583/ENSG00000145864/ENSG00000147606/ENSG00000132911/ENSG00000047617/ENSG00000078668/ENSG00000112053/ENSG00000171017/ENSG00000177119/ENSG00000165637/ENSG00000160746
GO:0008320	GO:0008320	protein transmembrane transporter activity	22	0.569096	1.92342	0.00129129	0.018447	0.0146164	7465	tags=50%, list=19%, signal=41%	ENSG00000025796/ENSG00000154174/ENSG00000134375/ENSG00000173726/ENSG00000158882/ENSG00000204152/ENSG00000160862/ENSG00000265354/ENSG00000058262/ENSG00000165029/ENSG00000170348
GO:0016407	GO:0016407	acetyltransferase activity	87	0.335755	1.55045	0.0013544	0.0191004	0.0151341	5820	tags=30%, list=15%, signal=26%	ENSG00000156269/ENSG00000167011/ENSG00000100522/ENSG00000150768/ENSG00000184788/ENSG00000171855/ENSG00000075239/ENSG00000171320/ENSG00000120437/ENSG00000121579/ENSG00000083168/ENSG00000125484/ENSG00000164134/ENSG00000134852/ENSG00000139618/ENSG00000111300/ENSG00000124422/ENSG00000095321/ENSG00000087253/ENSG00000158006/ENSG00000153395/ENSG00000139977/ENSG00000168092/ENSG00000124151/ENSG00000160294…
GO:0005416	GO:0005416	amino acid:cation symporter activity	22	0.5651	1.90992	0.00144781	0.0201593	0.0159731	2156	tags=32%, list=5%, signal=30%	ENSG00000132164/ENSG00000072041/ENSG00000196517/ENSG00000105143/ENSG00000182902/ENSG00000186335/ENSG00000111371
GO:0003724	GO:0003724	RNA helicase activity	75	0.337424	1.47702	0.00163589	0.0224935	0.0178226	9837	tags=49%, list=25%, signal=37%	ENSG00000165732/ENSG00000173809/ENSG00000145907/ENSG00000197275/ENSG00000067248/ENSG00000021776/ENSG00000039123/ENSG00000278053/ENSG00000156414/ENSG00000115267/ENSG00000137628/ENSG00000088205/ENSG00000109606/ENSG00000110367/ENSG00000215301/ENSG00000135829/ENSG00000118197/ENSG00000178105/ENSG00000184735/ENSG00000089876/ENSG00000145833/ENSG00000005100/ENSG00000079785/ENSG00000156502/ENSG00000174953…
GO:0022884	GO:0022884	macromolecule transmembrane transporter activity	27	0.525194	1.86757	0.00165995	0.0225425	0.0178614	10633	tags=59%, list=27%, signal=43%	ENSG00000025796/ENSG00000154174/ENSG00000134375/ENSG00000173726/ENSG00000158882/ENSG00000204152/ENSG00000072858/ENSG00000160862/ENSG00000265354/ENSG00000058262/ENSG00000165029/ENSG00000170348/ENSG00000139370/ENSG00000149577/ENSG00000065665/ENSG00000100216
GO:0031624	GO:0031624	ubiquitin conjugating enzyme binding	32	0.484572	1.77717	0.00190847	0.0256014	0.0202852	8949	tags=44%, list=23%, signal=34%	ENSG00000137393/ENSG00000043093/ENSG00000100302/ENSG00000166233/ENSG00000185345/ENSG00000034677/ENSG00000145495/ENSG00000013561/ENSG00000137692/ENSG00000109184/ENSG00000136536/ENSG00000001629/ENSG00000101695/ENSG00000186951
GO:0051087	GO:0051087	chaperone binding	106	0.307565	1.45345	0.00203248	0.0269365	0.021343	8116	tags=38%, list=20%, signal=30%	ENSG00000171564/ENSG00000047457/ENSG00000105409/ENSG00000109971/ENSG00000122194/ENSG00000149428/ENSG00000102580/ENSG00000163399/ENSG00000144381/ENSG00000138760/ENSG00000198855/ENSG00000110958/ENSG00000185345/ENSG00000140403/ENSG00000064651/ENSG00000128590/ENSG00000164284/ENSG00000052795/ENSG00000058056/ENSG00000069345/ENSG00000077232/ENSG00000217128/ENSG00000044574/ENSG00000163631/ENSG00000105953…
GO:0030515	GO:0030515	snoRNA binding	32	0.480745	1.76313	0.00209416	0.0274235	0.0217289	11202	tags=69%, list=28%, signal=49%	ENSG00000165732/ENSG00000253729/ENSG00000140876/ENSG00000117597/ENSG00000173598/ENSG00000119285/ENSG00000166197/ENSG00000087269/ENSG00000165609/ENSG00000167721/ENSG00000055044/ENSG00000108651/ENSG00000065183/ENSG00000083635/ENSG00000130826/ENSG00000165733/ENSG00000182117/ENSG00000079246/ENSG00000112578/ENSG00000145912/ENSG00000177971/ENSG00000101361
GO:0016597	GO:0016597	amino acid binding	51	0.390621	1.61152	0.002287	0.0295089	0.0233812	3117	tags=24%, list=8%, signal=22%	ENSG00000180176/ENSG00000132437/ENSG00000172482/ENSG00000128683/ENSG00000136750/ENSG00000124713/ENSG00000151790/ENSG00000198650/ENSG00000130707/ENSG00000001084/ENSG00000090861/ENSG00000182199
GO:0042605	GO:0042605	peptide antigen binding	35	-0.58242	-1.60972	0.00230706	0.0295089	0.0233812	12499	tags=77%, list=32%, signal=53%	ENSG00000204592/ENSG00000231925/ENSG00000231389/ENSG00000204525/ENSG00000206503/ENSG00000204287/ENSG00000234745/ENSG00000196735/ENSG00000196126/ENSG00000021488/ENSG00000204632/ENSG00000198502/ENSG00000179344/ENSG00000211799/ENSG00000223865/ENSG00000204642/ENSG00000237541/ENSG00000211794/ENSG00000211699/ENSG00000211790/ENSG00000211803/ENSG00000211785/ENSG00000104938/ENSG00000211789/ENSG00000211810…
GO:0099529	GO:0099529	neurotransmitter receptor activity involved in regulation of postsynaptic membrane potential	46	0.410884	1.66381	0.00246623	0.0311822	0.0247071	3330	tags=24%, list=8%, signal=22%	ENSG00000011677/ENSG00000101204/ENSG00000160716/ENSG00000117971/ENSG00000169684/ENSG00000168539/ENSG00000186297/ENSG00000120903/ENSG00000164418/ENSG00000145864/ENSG00000138435
GO:0047485	GO:0047485	protein N-terminus binding	109	0.299492	1.46112	0.00251065	0.0313246	0.0248199	10799	tags=48%, list=27%, signal=35%	ENSG00000135413/ENSG00000142319/ENSG00000128683/ENSG00000101188/ENSG00000104408/ENSG00000169032/ENSG00000104320/ENSG00000143933/ENSG00000185787/ENSG00000070367/ENSG00000112685/ENSG00000114209/ENSG00000119523/ENSG00000143799/ENSG00000124151/ENSG00000175595/ENSG00000157193/ENSG00000198668/ENSG00000225830/ENSG00000134308/ENSG00000181163/ENSG00000111358/ENSG00000092108/ENSG00000070770/ENSG00000132912…
GO:0035673	GO:0035673	oligopeptide transmembrane transporter activity	11	0.698051	2.00668	0.00253445	0.0313246	0.0248199	2774	tags=36%, list=7%, signal=34%	ENSG00000088386/ENSG00000158296/ENSG00000125257/ENSG00000163406
GO:0015020	GO:0015020	glucuronosyltransferase activity	25	0.517064	1.80801	0.00260903	0.0316759	0.0250982	1720	tags=28%, list=4%, signal=27%	ENSG00000135226/ENSG00000213759/ENSG00000156096/ENSG00000171234/ENSG00000167165/ENSG00000109956/ENSG00000158008
GO:0008175	GO:0008175	tRNA methyltransferase activity	32	0.474645	1.74076	0.00263323	0.0316759	0.0250982	12123	tags=69%, list=31%, signal=48%	ENSG00000183665/ENSG00000037474/ENSG00000174173/ENSG00000134077/ENSG00000188917/ENSG00000121486/ENSG00000137760/ENSG00000168806/ENSG00000160193/ENSG00000145331/ENSG00000037897/ENSG00000107614/ENSG00000178694/ENSG00000171103/ENSG00000068438/ENSG00000087995/ENSG00000206562/ENSG00000186666/ENSG00000241058/ENSG00000162623/ENSG00000138050/ENSG00000126814
GO:0019003	GO:0019003	GDP binding	75	0.330815	1.44809	0.00264925	0.0316759	0.0250982	7343	tags=40%, list=19%, signal=33%	ENSG00000152214/ENSG00000169213/ENSG00000165023/ENSG00000104388/ENSG00000025039/ENSG00000168461/ENSG00000133703/ENSG00000123728/ENSG00000119396/ENSG00000144566/ENSG00000125249/ENSG00000172340/ENSG00000099246/ENSG00000100883/ENSG00000100335/ENSG00000168118/ENSG00000132341/ENSG00000106615/ENSG00000041353/ENSG00000080371/ENSG00000134108/ENSG00000084733/ENSG00000165105/ENSG00000006451/ENSG00000123595…
GO:0015295	GO:0015295	solute:proton symporter activity	24	0.516941	1.82033	0.0027144	0.0321059	0.0254389	6574	tags=50%, list=17%, signal=42%	ENSG00000088386/ENSG00000182902/ENSG00000186335/ENSG00000197496/ENSG00000163406/ENSG00000022567/ENSG00000119899/ENSG00000110911/ENSG00000075415/ENSG00000151229/ENSG00000169359/ENSG00000164175
GO:1901618	GO:1901618	organic hydroxy compound transmembrane transporter activity	50	0.378558	1.56428	0.002765	0.0323563	0.0256374	3354	tags=26%, list=8%, signal=24%	ENSG00000256870/ENSG00000142319/ENSG00000148942/ENSG00000257046/ENSG00000165272/ENSG00000121270/ENSG00000100170/ENSG00000178301/ENSG00000145283/ENSG00000167580/ENSG00000125257/ENSG00000134538/ENSG00000103569
GO:0016408	GO:0016408	C-acyltransferase activity	20	0.550462	1.82563	0.00282168	0.0324869	0.0257408	7318	tags=55%, list=18%, signal=45%	ENSG00000215009/ENSG00000165389/ENSG00000196542/ENSG00000075239/ENSG00000120437/ENSG00000100596/ENSG00000116171/ENSG00000172296/ENSG00000090054/ENSG00000066813/ENSG00000138029
GO:0042165	GO:0042165	neurotransmitter binding	17	0.607487	1.96073	0.00283522	0.0324869	0.0257408	3330	tags=41%, list=8%, signal=38%	ENSG00000101204/ENSG00000160716/ENSG00000132164/ENSG00000117971/ENSG00000133019/ENSG00000119912/ENSG00000138435
GO:0030594	GO:0030594	neurotransmitter receptor activity	100	0.308536	1.52437	0.00301198	0.0341565	0.0270637	3845	tags=22%, list=10%, signal=20%	ENSG00000011677/ENSG00000268089/ENSG00000101204/ENSG00000160716/ENSG00000117971/ENSG00000166206/ENSG00000169684/ENSG00000168539/ENSG00000133019/ENSG00000186297/ENSG00000152822/ENSG00000101180/ENSG00000120903/ENSG00000164418/ENSG00000181499/ENSG00000196639/ENSG00000120251/ENSG00000105464/ENSG00000145864/ENSG00000138435/ENSG00000179097/ENSG00000168830
GO:0032182	GO:0032182	ubiquitin-like protein binding	112	0.297092	1.46124	0.00313324	0.035169	0.027866	9102	tags=42%, list=23%, signal=32%	ENSG00000069869/ENSG00000104517/ENSG00000043093/ENSG00000078804/ENSG00000119318/ENSG00000215114/ENSG00000010072/ENSG00000154277/ENSG00000185345/ENSG00000163961/ENSG00000161011/ENSG00000136738/ENSG00000137055/ENSG00000058056/ENSG00000139372/ENSG00000126261/ENSG00000077721/ENSG00000177889/ENSG00000113194/ENSG00000132952/ENSG00000163104/ENSG00000188554/ENSG00000155313/ENSG00000137692/ENSG00000109184…
GO:0005254	GO:0005254	chloride channel activity	71	0.34196	1.48967	0.00320574	0.0351882	0.0278812	4340	tags=23%, list=11%, signal=20%	ENSG00000011677/ENSG00000268089/ENSG00000137975/ENSG00000166206/ENSG00000167614/ENSG00000186297/ENSG00000127325/ENSG00000169504/ENSG00000169583/ENSG00000145864/ENSG00000147606/ENSG00000132911/ENSG00000047617/ENSG00000112053/ENSG00000177119/ENSG00000160746
GO:0015485	GO:0015485	cholesterol binding	49	0.402606	1.65331	0.00321807	0.0351882	0.0278812	8527	tags=53%, list=22%, signal=42%	ENSG00000110243/ENSG00000102003/ENSG00000007062/ENSG00000131748/ENSG00000175336/ENSG00000213585/ENSG00000138760/ENSG00000155066/ENSG00000057252/ENSG00000147475/ENSG00000141458/ENSG00000091039/ENSG00000165637/ENSG00000116171/ENSG00000185920/ENSG00000144645/ENSG00000130703/ENSG00000072858/ENSG00000010270/ENSG00000165029/ENSG00000107566/ENSG00000184792/ENSG00000070882/ENSG00000110245/ENSG00000160179…
GO:0004890	GO:0004890	GABA-A receptor activity	18	0.587403	1.88948	0.00323092	0.0351882	0.0278812	1269	tags=22%, list=3%, signal=22%	ENSG00000011677/ENSG00000268089/ENSG00000166206/ENSG00000186297
GO:0008009	GO:0008009	chemokine activity	47	-0.54243	-1.55201	0.00332878	0.0358986	0.0284441	12178	tags=55%, list=31%, signal=38%	ENSG00000275718/ENSG00000169245/ENSG00000277632/ENSG00000276070/ENSG00000274736/ENSG00000275152/ENSG00000276085/ENSG00000143184/ENSG00000163734/ENSG00000188373/ENSG00000275302/ENSG00000181374/ENSG00000137077/ENSG00000138755/ENSG00000081041/ENSG00000276409/ENSG00000163737/ENSG00000275385/ENSG00000143185/ENSG00000108702/ENSG00000131142/ENSG00000271503/ENSG00000102970/ENSG00000163735/ENSG00000172724…
GO:0022824	GO:0022824	transmitter-gated ion channel activity	58	0.354374	1.46667	0.00401371	0.0420617	0.0333273	3330	tags=22%, list=8%, signal=21%	ENSG00000011677/ENSG00000101204/ENSG00000160716/ENSG00000117971/ENSG00000166206/ENSG00000169684/ENSG00000186297/ENSG00000120903/ENSG00000164418/ENSG00000120251/ENSG00000105464/ENSG00000145864/ENSG00000138435
GO:0022835	GO:0022835	transmitter-gated channel activity	58	0.354374	1.46667	0.00401371	0.0420617	0.0333273	3330	tags=22%, list=8%, signal=21%	ENSG00000011677/ENSG00000101204/ENSG00000160716/ENSG00000117971/ENSG00000166206/ENSG00000169684/ENSG00000186297/ENSG00000120903/ENSG00000164418/ENSG00000120251/ENSG00000105464/ENSG00000145864/ENSG00000138435
GO:0008106	GO:0008106	alcohol dehydrogenase (NADP+) activity	22	0.529763	1.79049	0.00401498	0.0420617	0.0333273	2287	tags=27%, list=6%, signal=26%	ENSG00000227471/ENSG00000198074/ENSG00000121039/ENSG00000122787/ENSG00000165568/ENSG00000151632
GO:1904315	GO:1904315	transmitter-gated ion channel activity involved in regulation of postsynaptic membrane potential	43	0.409248	1.64438	0.00420815	0.0433553	0.0343524	3330	tags=23%, list=8%, signal=21%	ENSG00000011677/ENSG00000101204/ENSG00000160716/ENSG00000117971/ENSG00000169684/ENSG00000186297/ENSG00000120903/ENSG00000164418/ENSG00000145864/ENSG00000138435
GO:0140666	GO:0140666	annealing activity	14	0.636742	1.92778	0.00421729	0.0433553	0.0343524	12378	tags=79%, list=31%, signal=54%	ENSG00000004700/ENSG00000197299/ENSG00000215301/ENSG00000135046/ENSG00000121988/ENSG00000102081/ENSG00000106682/ENSG00000063046/ENSG00000114416/ENSG00000102038/ENSG00000085999
GO:0003684	GO:0003684	damaged DNA binding	68	0.331965	1.41166	0.00446814	0.0449586	0.0356227	10926	tags=51%, list=28%, signal=37%	ENSG00000104320/ENSG00000119318/ENSG00000143751/ENSG00000197299/ENSG00000012048/ENSG00000116062/ENSG00000113456/ENSG00000095002/ENSG00000101773/ENSG00000109674/ENSG00000139372/ENSG00000076248/ENSG00000175595/ENSG00000127423/ENSG00000132646/ENSG00000158290/ENSG00000070501/ENSG00000196419/ENSG00000070950/ENSG00000132383/ENSG00000163029/ENSG00000122008/ENSG00000170734/ENSG00000198924/ENSG00000189403…
GO:0005049	GO:0005049	nuclear export signal receptor activity	11	0.680358	1.95582	0.00447381	0.0449586	0.0356227	12658	tags=91%, list=32%, signal=62%	ENSG00000124207/ENSG00000132341/ENSG00000124571/ENSG00000132953/ENSG00000082898/ENSG00000204764/ENSG00000136243/ENSG00000169180/ENSG00000130227/ENSG00000126883
GO:0016780	GO:0016780	phosphotransferase activity, for other substituted phosphate groups	20	0.532812	1.76709	0.00449586	0.0449586	0.0356227	7092	tags=55%, list=18%, signal=45%	ENSG00000172269/ENSG00000165282/ENSG00000111670/ENSG00000149313/ENSG00000156471/ENSG00000138018/ENSG00000198964/ENSG00000163624/ENSG00000197563/ENSG00000151665/ENSG00000164023
GO:0016896	GO:0016896	exoribonuclease activity, producing 5'-phosphomonoesters	38	0.442482	1.66906	0.00464013	0.0458343	0.0363166	11196	tags=58%, list=28%, signal=42%	ENSG00000125107/ENSG00000146453/ENSG00000138035/ENSG00000076043/ENSG00000113300/ENSG00000174840/ENSG00000083520/ENSG00000088930/ENSG00000196678/ENSG00000166938/ENSG00000104626/ENSG00000143319/ENSG00000174606/ENSG00000138767/ENSG00000114127/ENSG00000151014/ENSG00000132773/ENSG00000103005/ENSG00000172795/ENSG00000140694/ENSG00000130713/ENSG00000119203
GO:0015932	GO:0015932	nucleobase-containing compound transmembrane transporter activity	51	0.373707	1.54174	0.00466677	0.0458343	0.0363166	7180	tags=37%, list=18%, signal=31%	ENSG00000156222/ENSG00000121270/ENSG00000112759/ENSG00000125257/ENSG00000102100/ENSG00000137860/ENSG00000005022/ENSG00000171612/ENSG00000124786/ENSG00000101986/ENSG00000174669/ENSG00000138459/ENSG00000157593/ENSG00000117620/ENSG00000116704/ENSG00000072858/ENSG00000169359/ENSG00000121073/ENSG00000100372
GO:0008353	GO:0008353	RNA polymerase II CTD heptapeptide repeat kinase activity	12	0.676816	1.97965	0.004728	0.0460248	0.0364675	7840	tags=75%, list=20%, signal=60%	ENSG00000167258/ENSG00000132964/ENSG00000155111/ENSG00000170312/ENSG00000100030/ENSG00000090061/ENSG00000134058/ENSG00000105810/ENSG00000135446
GO:0005283	GO:0005283	amino acid:sodium symporter activity	16	0.60643	1.91345	0.00487717	0.0470604	0.0372881	5118	tags=44%, list=13%, signal=38%	ENSG00000132164/ENSG00000072041/ENSG00000196517/ENSG00000105143/ENSG00000111371/ENSG00000134294/ENSG00000165970
GO:0034212	GO:0034212	peptide N-acetyltransferase activity	45	0.382283	1.50659	0.00496765	0.0475166	0.0376495	8623	tags=40%, list=22%, signal=31%	ENSG00000156269/ENSG00000121579/ENSG00000083168/ENSG00000125484/ENSG00000164134/ENSG00000134852/ENSG00000139618/ENSG00000111300/ENSG00000124422/ENSG00000139977/ENSG00000124151/ENSG00000160294/ENSG00000128708/ENSG00000173418/ENSG00000008838/ENSG00000136504/ENSG00000141446/ENSG00000114166
GO:0071949	GO:0071949	FAD binding	37	0.42644	1.57827	0.00506536	0.0480336	0.0380592	9230	tags=59%, list=23%, signal=46%	ENSG00000117009/ENSG00000104549/ENSG00000100033/ENSG00000197930/ENSG00000166816/ENSG00000116133/ENSG00000165097/ENSG00000008405/ENSG00000124275/ENSG00000168306/ENSG00000156709/ENSG00000124588/ENSG00000166394/ENSG00000159348/ENSG00000018510/ENSG00000243156/ENSG00000137767/ENSG00000203797/ENSG00000161533/ENSG00000133816/ENSG00000087008/ENSG00000132763
GO:0017116	GO:0017116	single-stranded DNA helicase activity	23	0.510113	1.76743	0.00521629	0.049042	0.0388582	10039	tags=65%, list=25%, signal=49%	ENSG00000136982/ENSG00000104738/ENSG00000133119/ENSG00000051180/ENSG00000073111/ENSG00000076003/ENSG00000135829/ENSG00000163918/ENSG00000138346/ENSG00000125885/ENSG00000111445/ENSG00000112118/ENSG00000111877/ENSG00000049541/ENSG00000051341
