# Supplementary material for: Transcriptomic Profiling of Breast Cancer Cells Induced by Tumor-Associated Macrophages Generates a Robust Prognostic Gene Signature
Source: Cancers (Basel). 2022 Oct 31;14(21):5364. doi: 10.3390/cancers14215364 (PMC9655582; doi:10.3390/cancers14215364)
Supplement: Supplementary file 1 [file cancers-14-05364-s001.zip › Supplementary Table S4.xlsx]

## Sheet: 工作表1
	cell type	group1	group2	p	p.adj	p.format	p.signif	method
3	T.cell.CD8._TIMER	H	L	0.0271017	0.027	0.027	*	Wilcoxon
14	T.cell.follicular.helper_CIBERSORT	H	L	0.0279369	0.028	0.028	*	Wilcoxon
19	Monocyte_CIBERSORT	H	L	0.0496789	0.05	0.05	*	Wilcoxon
25	Mast.cell.activated_CIBERSORT	H	L	0.0164317	0.016	0.016	*	Wilcoxon
29	B.cell.naive_CIBERSORT.ABS	H	L	0.0464656	0.046	0.046	*	Wilcoxon
34	T.cell.CD4..memory.resting_CIBERSORT.ABS	H	L	0.0221898	0.022	0.022	*	Wilcoxon
52	Macrophage.M1_QUANTISEQ	H	L	0.0348751	0.035	0.035	*	Wilcoxon
59	T.cell.regulatory..Tregs._QUANTISEQ	H	L	0.0280064	0.028	0.028	*	Wilcoxon
60	Myeloid.dendritic.cell_QUANTISEQ	H	L	0.0405478	0.041	0.041	*	Wilcoxon
61	uncharacterized.cell_QUANTISEQ	H	L	0.0201541	0.02	0.02	*	Wilcoxon
74	B.cell_XCELL	H	L	0.0210126	0.021	0.021	*	Wilcoxon
83	T.cell.CD8..effector.memory_XCELL	H	L	0.019964	0.02	0.02	*	Wilcoxon
86	Common.myeloid.progenitor_XCELL	H	L	0.0202384	0.02	0.02	*	Wilcoxon
91	Granulocyte.monocyte.progenitor_XCELL	H	L	0.01804	0.018	0.018	*	Wilcoxon
109	immune.score_XCELL	H	L	0.0166032	0.017	0.017	*	Wilcoxon
117	Macrophage_EPIC	H	L	0.0353505	0.035	0.035	*	Wilcoxon
119	uncharacterized.cell_EPIC	H	L	0.0138475	0.014	0.014	*	Wilcoxon
4	Neutrophil_TIMER	H	L	0.00981198	0.0098	0.0098	*	Wilcoxon
20	Macrophage.M0_CIBERSORT	H	L	0.00180605	0.0018	0.0018	*	Wilcoxon
23	Myeloid.dendritic.cell.resting_CIBERSORT	H	L	0.00973884	0.0097	0.0097	*	Wilcoxon
28	Neutrophil_CIBERSORT	H	L	0.00706923	0.0071	0.0071	*	Wilcoxon
31	B.cell.plasma_CIBERSORT.ABS	H	L	0.00940044	0.0094	0.0094	*	Wilcoxon
41	Monocyte_CIBERSORT.ABS	H	L	0.00244813	0.0024	0.0024	*	Wilcoxon
43	Macrophage.M1_CIBERSORT.ABS	H	L	0.0015587	0.0016	0.0016	*	Wilcoxon
45	Myeloid.dendritic.cell.resting_CIBERSORT.ABS	H	L	0.00361102	0.0036	0.0036	*	Wilcoxon
50	Neutrophil_CIBERSORT.ABS	H	L	0.00967521	0.0097	0.0097	*	Wilcoxon
71	Endothelial.cell_MCPCOUNTER	H	L	0.00357256	0.0036	0.0036	*	Wilcoxon
78	T.cell.CD4..central.memory_XCELL	H	L	0.00782969	0.0078	0.0078	*	Wilcoxon
84	Class.switched.memory.B.cell_XCELL	H	L	0.00215458	0.0022	0.0022	*	Wilcoxon
87	Myeloid.dendritic.cell_XCELL	H	L	0.00115852	0.0012	0.0012	*	Wilcoxon
2	T.cell.CD4._TIMER	H	L	0.000286282	0.00029	0.00029	*	Wilcoxon
17	NK.cell.resting_CIBERSORT	H	L	0.000238927	0.00024	0.00024	*	Wilcoxon
39	NK.cell.resting_CIBERSORT.ABS	H	L	0.000245249	0.00025	0.00025	*	Wilcoxon
53	Macrophage.M2_QUANTISEQ	H	L	0.00076082	0.00076	0.00076	*	Wilcoxon
56	NK.cell_QUANTISEQ	H	L	0.000125466	0.00013	0.00013	*	Wilcoxon
63	T.cell.CD8._MCPCOUNTER	H	L	0.000187623	0.00019	0.00019	*	Wilcoxon
81	T.cell.CD8._XCELL	H	L	0.000639974	0.00064	0.00064	*	Wilcoxon
85	Common.lymphoid.progenitor_XCELL	H	L	0.000258623	0.00026	0.00026	*	Wilcoxon
107	T.cell.CD4..Th2_XCELL	H	L	0.000942533	0.00094	0.00094	*	Wilcoxon
8	B.cell.memory_CIBERSORT	H	L	5.90583e-06	5.9e-06	5.9e-06	*	Wilcoxon
10	T.cell.CD8._CIBERSORT	H	L	4.85782e-10	4.9e-10	4.9e-10	*	Wilcoxon
15	T.cell.regulatory..Tregs._CIBERSORT	H	L	2.6537e-05	2.7e-05	2.7e-05	*	Wilcoxon
18	NK.cell.activated_CIBERSORT	H	L	1.27173e-07	1.3e-07	1.3e-07	*	Wilcoxon
22	Macrophage.M2_CIBERSORT	H	L	2.4813e-11	2.5e-11	2.5e-11	*	Wilcoxon
30	B.cell.memory_CIBERSORT.ABS	H	L	3.17387e-06	3.2e-06	3.2e-06	*	Wilcoxon
32	T.cell.CD8._CIBERSORT.ABS	H	L	2.57595e-10	2.6e-10	2.6e-10	*	Wilcoxon
36	T.cell.follicular.helper_CIBERSORT.ABS	H	L	2.38839e-05	2.4e-05	2.4e-05	*	Wilcoxon
37	T.cell.regulatory..Tregs._CIBERSORT.ABS	H	L	4.37972e-07	4.4e-07	4.4e-07	*	Wilcoxon
40	NK.cell.activated_CIBERSORT.ABS	H	L	1.64673e-09	1.6e-09	1.6e-09	*	Wilcoxon
47	Mast.cell.activated_CIBERSORT.ABS	H	L	2.7053e-05	2.7e-05	2.7e-05	*	Wilcoxon
51	B.cell_QUANTISEQ	H	L	1.81382e-07	1.8e-07	1.8e-07	*	Wilcoxon
55	Neutrophil_QUANTISEQ	H	L	5.97928e-05	6e-05	6e-05	*	Wilcoxon
58	T.cell.CD8._QUANTISEQ	H	L	6.50726e-06	6.5e-06	6.5e-06	*	Wilcoxon
62	T.cell_MCPCOUNTER	H	L	2.73746e-10	2.7e-10	2.7e-10	*	Wilcoxon
64	cytotoxicity.score_MCPCOUNTER	H	L	1.25422e-05	1.3e-05	1.3e-05	*	Wilcoxon
65	NK.cell_MCPCOUNTER	H	L	3.29777e-07	3.3e-07	3.3e-07	*	Wilcoxon
66	B.cell_MCPCOUNTER	H	L	1.68779e-09	1.7e-09	1.7e-09	*	Wilcoxon
69	Myeloid.dendritic.cell_MCPCOUNTER	H	L	2.12921e-08	2.1e-08	2.1e-08	*	Wilcoxon
73	Myeloid.dendritic.cell.activated_XCELL	H	L	1.31815e-06	1.3e-06	1.3e-06	*	Wilcoxon
76	T.cell.CD4..naive_XCELL	H	L	2.80379e-05	2.8e-05	2.8e-05	*	Wilcoxon
79	T.cell.CD4..effector.memory_XCELL	H	L	3.13335e-07	3.1e-07	3.1e-07	*	Wilcoxon
80	T.cell.CD8..naive_XCELL	H	L	3.05437e-06	3.1e-06	3.1e-06	*	Wilcoxon
82	T.cell.CD8..central.memory_XCELL	H	L	2.7025e-07	2.7e-07	2.7e-07	*	Wilcoxon
88	Endothelial.cell_XCELL	H	L	1.10879e-07	1.1e-07	1.1e-07	*	Wilcoxon
90	Cancer.associated.fibroblast_XCELL	H	L	1.39235e-07	1.4e-07	1.4e-07	*	Wilcoxon
92	Hematopoietic.stem.cell_XCELL	H	L	3.5934e-08	3.6e-08	3.6e-08	*	Wilcoxon
97	B.cell.memory_XCELL	H	L	4.62493e-06	4.6e-06	4.6e-06	*	Wilcoxon
102	T.cell.NK_XCELL	H	L	2.42658e-11	2.4e-11	2.4e-11	*	Wilcoxon
110	stroma.score_XCELL	H	L	3.77684e-09	3.8e-09	3.8e-09	*	Wilcoxon
111	microenvironment.score_XCELL	H	L	4.44922e-10	4.4e-10	4.4e-10	*	Wilcoxon
112	B.cell_EPIC	H	L	1.36904e-08	1.4e-08	1.4e-08	*	Wilcoxon
116	Endothelial.cell_EPIC	H	L	5.68076e-05	5.7e-05	5.7e-05	*	Wilcoxon
118	NK.cell_EPIC	H	L	5.92698e-05	5.9e-05	5.9e-05	*	Wilcoxon
1	B.cell_TIMER	H	L	0.280593	0.28	0.28	ns	Wilcoxon
5	Macrophage_TIMER	H	L	0.0581322	0.058	0.058	ns	Wilcoxon
6	Myeloid.dendritic.cell_TIMER	H	L	0.0522138	0.052	0.052	ns	Wilcoxon
7	B.cell.naive_CIBERSORT	H	L	0.695973	0.7	0.7	ns	Wilcoxon
9	B.cell.plasma_CIBERSORT	H	L	0.111265	0.11	0.11	ns	Wilcoxon
11	T.cell.CD4..naive_CIBERSORT	H	L	0.0865857	0.087	0.087	ns	Wilcoxon
12	T.cell.CD4..memory.resting_CIBERSORT	H	L	0.704499	0.7	0.7	ns	Wilcoxon
13	T.cell.CD4..memory.activated_CIBERSORT	H	L	0.275446	0.28	0.28	ns	Wilcoxon
16	T.cell.gamma.delta_CIBERSORT	H	L	0.0763673	0.076	0.076	ns	Wilcoxon
21	Macrophage.M1_CIBERSORT	H	L	0.136983	0.14	0.14	ns	Wilcoxon
24	Myeloid.dendritic.cell.activated_CIBERSORT	H	L	0.141066	0.14	0.14	ns	Wilcoxon
26	Mast.cell.resting_CIBERSORT	H	L	0.106897	0.11	0.11	ns	Wilcoxon
27	Eosinophil_CIBERSORT	H	L	0.0707822	0.071	0.071	ns	Wilcoxon
33	T.cell.CD4..naive_CIBERSORT.ABS	H	L	0.0872757	0.087	0.087	ns	Wilcoxon
35	T.cell.CD4..memory.activated_CIBERSORT.ABS	H	L	0.274091	0.27	0.27	ns	Wilcoxon
38	T.cell.gamma.delta_CIBERSORT.ABS	H	L	0.0500199	0.05	0.05	ns	Wilcoxon
42	Macrophage.M0_CIBERSORT.ABS	H	L	0.105634	0.11	0.11	ns	Wilcoxon
44	Macrophage.M2_CIBERSORT.ABS	H	L	0.377343	0.38	0.38	ns	Wilcoxon
46	Myeloid.dendritic.cell.activated_CIBERSORT.ABS	H	L	0.150994	0.15	0.15	ns	Wilcoxon
48	Mast.cell.resting_CIBERSORT.ABS	H	L	0.221854	0.22	0.22	ns	Wilcoxon
49	Eosinophil_CIBERSORT.ABS	H	L	0.0745214	0.075	0.075	ns	Wilcoxon
54	Monocyte_QUANTISEQ	H	L	0.0507699	0.051	0.051	ns	Wilcoxon
57	T.cell.CD4...non.regulatory._QUANTISEQ	H	L	0.381392	0.38	0.38	ns	Wilcoxon
67	Monocyte_MCPCOUNTER	H	L	0.251967	0.25	0.25	ns	Wilcoxon
68	Macrophage.Monocyte_MCPCOUNTER	H	L	0.251967	0.25	0.25	ns	Wilcoxon
70	Neutrophil_MCPCOUNTER	H	L	0.144748	0.14	0.14	ns	Wilcoxon
72	Cancer.associated.fibroblast_MCPCOUNTER	H	L	0.197003	0.2	0.2	ns	Wilcoxon
75	T.cell.CD4..memory_XCELL	H	L	0.438313	0.44	0.44	ns	Wilcoxon
77	T.cell.CD4...non.regulatory._XCELL	H	L	0.969936	0.97	0.97	ns	Wilcoxon
89	Eosinophil_XCELL	H	L	0.783517	0.78	0.78	ns	Wilcoxon
93	Macrophage_XCELL	H	L	0.585925	0.59	0.59	ns	Wilcoxon
94	Macrophage.M1_XCELL	H	L	0.446187	0.45	0.45	ns	Wilcoxon
95	Macrophage.M2_XCELL	H	L	0.489592	0.49	0.49	ns	Wilcoxon
96	Mast.cell_XCELL	H	L	0.151999	0.15	0.15	ns	Wilcoxon
98	Monocyte_XCELL	H	L	0.205168	0.21	0.21	ns	Wilcoxon
99	B.cell.naive_XCELL	H	L	0.683782	0.68	0.68	ns	Wilcoxon
100	Neutrophil_XCELL	H	L	0.558729	0.56	0.56	ns	Wilcoxon
101	NK.cell_XCELL	H	L	0.841533	0.84	0.84	ns	Wilcoxon
103	Plasmacytoid.dendritic.cell_XCELL	H	L	0.302325	0.3	0.3	ns	Wilcoxon
104	B.cell.plasma_XCELL	H	L	0.0658753	0.066	0.066	ns	Wilcoxon
105	T.cell.gamma.delta_XCELL	H	L	0.782849	0.78	0.78	ns	Wilcoxon
106	T.cell.CD4..Th1_XCELL	H	L	0.0883678	0.088	0.088	ns	Wilcoxon
108	T.cell.regulatory..Tregs._XCELL	H	L	0.101521	0.1	0.1	ns	Wilcoxon
113	Cancer.associated.fibroblast_EPIC	H	L	0.447142	0.45	0.45	ns	Wilcoxon
114	T.cell.CD4._EPIC	H	L	0.200495	0.2	0.2	ns	Wilcoxon
115	T.cell.CD8._EPIC	H	L	0.247156	0.25	0.25	ns	Wilcoxon
ns: Non significant;
*: p<0.05
