# Supplementary material for: Transcriptomic Profiling of Breast Cancer Cells Induced by Tumor-Associated Macrophages Generates a Robust Prognostic Gene Signature
Source: Cancers (Basel). 2022 Oct 31;14(21):5364. doi: 10.3390/cancers14215364 (PMC9655582; doi:10.3390/cancers14215364)
Supplement: Supplementary file 1 [file cancers-14-05364-s001.zip › Supplementary Table S5.xlsm]

## Sheet: BRCAA_drug_lm
	drug	intercept	coefficient	pvalue	r.squared	adj.r.squared
1	Erlotinib_1	0.391889	0.112062	1.08878e-06	0.0252696	0.0242204
2	Rapamycin_3	0.667805	-0.00105475	0.969309	1.5978e-06	-0.00107715
3	Sunitinib_5	0.55447	0.0428562	0.0210173	0.00571902	0.00464875
4	PHA.665752_6	0.239101	0.14592	0.0122063	0.00674872	0.00567841
5	MG.132_9	0.676853	0.0361785	0.10907	0.00276154	0.00168809
6	Paclitaxel_11	0.57994	-0.0265365	0.177271	0.00195861	0.00088429
7	Cyclopamine_17	0.552532	0.0243642	0.389685	0.000796586	-0.000278983
8	AZ628_29	0.66047	0.00656287	0.505042	0.00048522	-0.000605954
9	Sorafenib_30	0.968227	-0.133813	0.000685638	0.0123387	0.0112756
10	Tozasertib_32	0.646616	0.0173774	0.350239	0.000940357	-0.000136216
11	Imatinib_34	1.05931	-0.129716	7.02014e-05	0.0168784	0.0158202
12	NVP.TAE684_35	0.661503	0.009935	0.377778	0.000837474	-0.000238051
13	Crizotinib_37	0.715815	-0.0167572	0.415917	0.000714071	-0.000363907
14	Saracatinib_38	0.648741	0.00940525	0.681029	0.000181965	-0.000894266
15	S.Trityl.L.cysteine_41	0.578071	0.0771063	0.000474809	0.0130664	0.012004
16	Z.LLNle.CHO_45	0.638212	0.0457526	0.0104455	0.00703736	0.00596851
17	Dasatinib_51	0.668279	0.025883	0.000623915	0.0126063	0.0115365
18	GNF.2_52	0.924958	-0.101996	0.0139088	0.00649437	0.00542493
19	CGP.60474_53	0.786152	0.0517196	0.020505	0.00576509	0.00469487
20	CGP.082996_54	0.911232	-0.087422	3.05767e-05	0.018546	0.0174895
21	A.770041_55	0.606494	0.0303651	0.115578	0.00266337	0.00158981
22	WH.4.023_56	0.622608	0.0221547	0.0564648	0.00392345	0.00284777
23	WZ.1.84_59	0.286142	0.0983475	0.533985	0.000416502	-0.000659476
24	BI.2536_60	0.532598	-0.067174	0.00124408	0.0111636	0.0100992
25	BMS.536924_62	0.590649	0.0509756	0.0174258	0.00606979	0.0049999
26	BMS.509744_63	0.829045	-0.0539838	0.0436997	0.00437181	0.00330009
27	CMK_64	0.584593	0.0393458	0.120381	0.00259475	0.00152112
28	Pyrimethamine_71	0.836119	-0.0430731	0.00206903	0.0101658	0.00910032
29	JW.7.52.1_83	0.628389	-0.0219955	0.223848	0.00159219	0.000517479
30	A.443654_86	0.57195	-0.112496	5.49525e-06	0.0220014	0.0209487
31	GW843682X_87	0.588365	-0.0312458	0.0706386	0.00351359	0.00244095
32	Entinostat_88	0.818024	-0.181786	6.87999e-07	0.0261972	0.025149
33	Parthenolide_89	0.485784	0.0585342	0.0312746	0.00498251	0.00391145
34	GSK319347A_91	0.185121	0.120701	0.0447763	0.00432776	0.00325599
35	TGX221_94	0.582293	0.0226977	0.111219	0.00273432	0.00165852
36	Bortezomib_104	0.728322	0.0101288	0.339981	0.000981191	-9.53382e-05
37	XMD8.85_106	0.583634	0.0313487	0.0030621	0.00940097	0.00833466
38	Seliciclib_110	0.31033	0.0898642	0.00272057	0.00963128	0.00856522
39	Salubrinal_111	0.42942	0.0654387	0.0702189	0.00352409	0.00245145
40	Lapatinib_119	0.712369	-0.0180083	0.294735	0.00119587	0.000107844
41	GSK269962A_127	0.61806	0.0231311	0.112628	0.0027188	0.00164066
42	Doxorubicin_133	0.651854	-0.00996032	0.302532	0.0011442	6.9005e-05
43	Etoposide_134	0.679624	-0.00602846	0.271604	0.00130085	0.000225829
44	Gemcitabine_135	0.655524	-0.00662027	0.0718912	0.00348267	0.00240999
45	Mitomycin.C_136	0.657423	-0.0167182	0.0350388	0.00477401	0.00370272
46	Vinorelbine_140	0.636372	-0.00872854	0.227235	0.00156914	0.000494399
47	NSC.87877_147	0.772785	-0.0203771	0.269289	0.00133066	0.000241603
48	Bicalutamide_150	0.598834	0.0275679	0.323918	0.00104857	-2.7886e-05
49	QS11_151	0.684029	-0.00451002	0.538601	0.000409379	-0.000672429
50	CP466722_152	0.647405	0.00963132	0.587017	0.000317695	-0.000758389
51	Midostaurin_153	0.670119	0.0140814	0.0980745	0.00294932	0.00187375
52	CHIR.99021_154	0.537671	0.0433861	0.0602133	0.00379622	0.00272388
53	Ponatinib_155	0.660019	0.0246727	0.00611667	0.00810515	0.00703167
54	AZD6482_156	0.625994	0.0175151	0.0416359	0.00450309	0.00342103
55	JNK.9L_157	0.66762	-0.00818805	0.421418	0.000695887	-0.00037979
56	PF.562271_158	0.68754	-0.00916494	0.302588	0.00114394	6.87428e-05
57	HG6.64.1_159	0.448235	0.225651	1.76292e-06	0.0242961	0.0232458
58	JQ1_163	0.674482	-0.0178325	0.00592972	0.00812143	0.00705374
59	JQ12_164	0.674954	-0.00420068	0.648691	0.000223513	-0.000852673
60	DMOG_165	0.618922	0.0079893	0.125849	0.00252021	0.0014465
61	FTI.277_166	0.738898	-0.0334556	0.118201	0.00262834	0.00155358
62	OSU.03012_167	0.641733	0.0146702	0.203544	0.00173974	0.000665189
63	Shikonin_170	0.668843	0.00850949	0.433412	0.000660699	-0.000415016
64	AKT.inhibitor.VIII_171	0.838979	-0.0724766	6.46358e-05	0.0170804	0.0160201
65	Embelin_172	0.781352	-0.0388165	0.0110856	0.00692426	0.00585528
66	FH535_173	0.721957	-0.0262161	0.028171	0.00517511	0.00410426
67	PAC.1_175	0.652553	0.00785307	0.508442	0.000473383	-0.000608356
68	IPA.3_176	0.585793	0.020438	0.00923244	0.00730397	0.00623078
69	GSK650394_177	0.66831	0.000483868	0.951187	4.04469e-06	-0.0010747
70	BAY.61.3606_178	0.634357	0.0165187	0.153888	0.00218981	0.00111459
71	X5.Fluorouracil_179	0.703202	-0.00894503	0.185007	0.00190066	0.00082047
72	Thapsigargin_180	-0.217533	-0.210133	0.0094061	0.00723706	0.00616842
73	Obatoclax.Mesylate_182	0.664332	-0.00647636	0.327089	0.00103381	-4.15051e-05
74	BMS.754807_184	0.657007	0.019657	0.0775841	0.00334903	0.00227621
75	Linsitinib_185	0.60744	0.0292703	0.0155839	0.00631374	0.00523833
76	Bexarotene_186	0.621947	0.0136308	0.380754	0.000827976	-0.000248718
77	Bleomycin_190	0.66967	-0.000699084	0.887307	2.18643e-05	-0.00106625
78	LFM.A13_192	0.552558	0.0252833	0.266603	0.0013283	0.000253299
79	GW.2580_193	0.817223	-0.0278454	0.13213	0.00244681	0.00136953
80	Luminespib_194	0.662103	-0.00257249	0.774689	8.8243e-05	-0.000988088
81	Phenformin_196	0.568877	0.013309	0.0807823	0.00328557	0.00221036
82	Bryostatin.1_197	0.773716	0.0364165	0.0522114	0.00406409	0.00298857
83	Pazopanib_199	0.628387	0.0128983	0.370779	0.000862364	-0.000213134
84	Dacinostat_200	0.649212	-0.0071727	0.676027	0.000188063	-0.000888161
85	Epothilone.B_201	0.619421	-0.0102177	0.180299	0.00193153	0.000857183
86	GSK1904529A_202	0.698641	-0.0129976	0.614577	0.000273053	-0.00080308
87	BMS.345541_203	0.721546	-0.0178101	0.262103	0.001355	0.000278875
88	Tipifarnib_204	0.67818	-0.00514966	0.552966	0.000379067	-0.000696951
89	Avagacestat_205	0.174379	0.104361	4.64898e-05	0.0177047	0.0166474
90	Ruxolitinib_206	0.654262	0.00386869	0.860521	3.32872e-05	-0.00104426
91	AS601245_207	0.622453	0.0220125	0.374359	0.000849552	-0.00022596
92	Ispinesib.Mesylate_208	0.677226	0.00409416	0.580957	0.000330949	-0.000754468
93	TL.2.105_211	0.686677	-0.0041693	0.838437	4.52604e-05	-0.00104283
94	AT.7519_219	0.703088	-0.0383213	5.32247e-05	0.0174707	0.0164108
95	TAK.715_221	0.540504	0.0313163	0.0295178	0.00509991	0.00402666
96	BX.912_222	0.622136	0.0180384	0.0235099	0.00556405	0.00448314
97	ZSTK474_223	0.659172	0.0122634	0.193896	0.00182196	0.000744016
98	AS605240_224	0.563439	0.0346749	0.0189427	0.00592602	0.00485367
99	Genentech.Cpd.10_225	0.648999	0.00921571	0.47856	0.000541248	-0.000535755
100	GSK1070916_226	0.656155	0.00911683	0.256303	0.00141584	0.000318493
101	AKT.inhibitor.VIII_228	0.738228	-0.0273217	0.0175828	0.00607906	0.00500455
102	Enzastaurin_229	0.57848	0.0281557	0.0959408	0.00298075	0.00190753
103	GSK429286A_230	0.623466	0.00959304	0.600904	0.000300487	-0.000796878
104	FMK_231	0.518184	0.0303027	0.125987	0.00251838	0.00144467
105	QL.XII.47_235	0.679669	-0.00755376	0.427824	0.000676909	-0.000398789
106	IC.87114_236	0.654187	0.00290927	0.846541	4.04693e-05	-0.0010394
107	Idelalisib_238	0.539022	0.0309738	0.00156795	0.0108016	0.0097276
108	UNC0638_245	0.755271	-0.0278619	0.041103	0.00448293	0.00341133
109	Cabozantinib_249	0.592527	0.0281265	0.101572	0.00288295	0.00180963
110	WZ3105_252	0.672588	-0.0124185	0.146233	0.00228585	0.0012049
111	XMD14.99_253	0.59698	0.0163674	0.248658	0.00145898	0.000364085
112	Quizartinib_254	0.699574	-0.0136876	0.510116	0.000467126	-0.000608797
113	CP724714_255	1.01504	-0.0797085	5.49538e-05	0.0174437	0.0163815
114	JW.7.24.1_256	0.672579	-0.00159727	0.904366	1.56992e-05	-0.00107124
115	NPK76.II.72.1_257	0.712555	-0.0149722	0.180095	0.00195649	0.000869295
116	STF.62247_258	0.611247	0.0132467	0.438148	0.000650711	-0.000430836
117	NG.25_260	0.745516	-0.0281952	0.0251927	0.00538769	0.00431591
118	TL.1.85_261	0.709357	-0.012122	0.39565	0.000777602	-0.000299146
119	VX.11e_262	0.646532	0.00806848	0.621047	0.000263468	-0.000813834
120	FR.180204_263	0.712908	-0.00873083	0.700599	0.000159222	-0.000917032
121	ACY.1215_264	0.661611	0.00489155	0.724703	0.000133573	-0.000942709
122	Tubastatin.A_265	0.653791	0.00341533	0.804897	6.59255e-05	-0.00101392
123	Zibotentan_266	0.613951	0.0101598	0.847905	3.9616e-05	-0.00103677
124	Sepantronium.bromide_268	0.680553	0.00269335	0.124484	0.00254122	0.00146637
125	NSC.207895_269	0.770663	-0.0255196	0.0297886	0.00507212	0.00400116
126	VNLG.124_271	0.645456	0.00644848	0.668305	0.000197923	-0.00087945
127	AR.42_272	0.706247	0.0735953	7.25722e-05	0.0168119	0.0157536
128	CUDC.101_273	0.677021	0.0165264	0.193021	0.00182322	0.000748759
129	Belinostat_274	0.669205	0.0457922	0.00481439	0.00852337	0.00745612
130	I.BET.762_275	0.526465	0.0383663	0.0200545	0.0058066	0.00473642
131	CAY10603_276	0.634817	0.0485547	0.00359938	0.00908675	0.0080201
132	Linifanib_277	0.593836	0.0330127	0.0608571	0.00377731	0.00270495
133	BIX02189_279	0.692174	-0.00521904	0.750002	0.000109342	-0.000966967
134	Alectinib_281	0.77159	-0.0274632	0.171563	0.00201331	0.000937898
135	Pelitinib_282	0.700429	-0.0175784	0.0134758	0.00660377	0.00552633
136	Omipalisib_283	0.652406	-0.00590621	0.442117	0.000636757	-0.000440143
137	JNJ38877605_284	0.703913	-0.00799317	0.784061	8.08721e-05	-0.000995467
138	SU11274_285	0.747654	-0.0209078	0.0486247	0.00426604	0.00317183
139	KIN001.236_286	0.9717	-0.0702554	0.000151933	0.015367	0.0143049
140	KIN001.244_287	0.666199	0.0011463	0.948065	4.57442e-06	-0.00107301
141	WHI.P97_288	0.760726	-0.0225846	0.133807	0.00242315	0.00134701
142	KIN001.042_289	0.735078	-0.0142332	0.422485	0.000698714	-0.000386304
143	KIN001.260_290	0.629138	0.0086124	0.609044	0.000283811	-0.00080048
144	KIN001.266_291	0.841118	-0.0521265	0.0776613	0.0033473	0.00227447
145	Masitinib_292	0.779945	-0.0304311	0.0661813	0.0036286	0.00255608
146	Amuvatinib_293	0.679507	-0.00248274	0.85703	3.549e-05	-0.00105737
147	MPS.1.IN.1_294	0.699393	-0.00789228	0.540346	0.000403686	-0.000672306
148	NVP.BHG712_295	0.58856	0.0264272	0.0501781	0.00412677	0.00305363
149	OSI.930_298	0.514122	0.0384497	0.0130307	0.00663905	0.00556631
150	OSI.027_299	0.654435	0.0140677	0.0901821	0.00313463	0.00204516
151	CX.5461_300	0.643387	0.00834968	0.328155	0.00103148	-4.61515e-05
152	PHA.793887_301	0.720597	-0.019052	0.00665266	0.00809111	0.0069975
153	PI.103_302	0.656756	0.0136452	0.0345754	0.0048243	0.00374727
154	PIK.93_303	0.64948	0.0075026	0.522287	0.000442229	-0.000637207
155	SB52334_304	0.78561	-0.0262088	0.0195703	0.0059287	0.00484465
156	TPCA.1_305	0.599436	0.0235418	0.0308675	0.005012	0.00393981
157	Fedratinib_306	0.638366	0.0136695	0.181702	0.00192745	0.000848455
158	Foretinib_308	0.664768	0.0267381	0.0480685	0.00419965	0.00312775
159	Y.39983_309	0.576609	0.020699	0.150448	0.0022462	0.00116168
160	YM201636_310	0.807851	-0.0621388	0.0061762	0.00804304	0.00697527
161	Tivozanib_312	0.666838	0.011074	0.621966	0.000262366	-0.0008161
162	WYE.125132_317	0.667922	-0.0134378	0.0339342	0.00483787	0.0037655
163	GSK690693_326	0.79598	-0.0340692	0.0020164	0.0103269	0.00924996
164	SNX.2112_328	0.68127	0.0143647	0.119726	0.00260393	0.0015303
165	QL.XI.92_329	0.583418	0.0226356	0.107437	0.00282672	0.0017381
166	XMD13.2_330	0.665733	0.00169104	0.871786	2.88923e-05	-0.00107972
167	QL.X.138_331	0.678973	-0.00458148	0.548568	0.00039432	-0.000700538
168	XMD15.27_332	0.696557	-0.00588793	0.782196	8.28467e-05	-0.00100049
169	T0901317_333	0.544749	0.0285473	0.036757	0.004722	0.00364253
170	Selisistat_341	0.213501	0.084099	0.00932303	0.00725398	0.00618537
171	Tenovin.6_342	0.68966	-0.00917585	0.421501	0.00069564	-0.000380037
172	THZ.2.49_344	0.657064	0.00493791	0.536541	0.000412652	-0.000666816
173	KIN001.270_345	0.671785	-0.000427397	0.98393	4.37407e-07	-0.00107715
174	THZ.2.102.1_346	0.670345	0.000228364	0.969426	1.59771e-06	-0.00108536
175	AT7867_356	0.793648	-0.0391225	8.82337e-05	0.0164558	0.0153948
176	CI.1033_362	0.780036	-0.0497062	4.10977e-08	0.0319965	0.0309512
177	PF.00299804_363	0.747105	-0.0402556	9.32708e-05	0.0164501	0.0153822
178	TWS119_366	0.697154	-0.010656	0.302914	0.00114363	6.72728e-05
179	Torin.2_371	0.661979	-0.00687668	0.395889	0.000775981	-0.00029961
180	Pilaralisib_372	0.722588	-0.0159246	0.270746	0.00130833	0.000230994
181	GSK1059615_374	0.670479	0.0191287	0.0301752	0.00507015	0.00399455
182	Voxtalisib_375	0.558521	0.0260145	0.114465	0.00268551	0.00160965
183	Brivanib..BMS.540215_376	0.748481	-0.017917	0.1905	0.00187017	0.00078051
184	BIBF.1120_380	0.729258	-0.0222895	0.0102496	0.007081	0.00601104
185	AST.1306_381	0.729411	-0.0358792	0.00142439	0.0109563	0.00988586
186	Apitolisib_382	0.673273	-0.0107314	0.16694	0.0020552	0.000980982
187	LIMK1.inhibitor.BMS4_406	0.790748	-0.0244467	0.173839	0.00199426	0.000917659
188	kb.NB.142.70_407	0.651696	0.00700016	0.496178	0.000498639	-0.00057725
189	Sphingosine.Kinase.1.Inhibitor.II_408	0.763606	-0.0270573	0.371577	0.000860422	-0.000216238
190	eEF2K.Inhibitor..A.484954_409	0.614582	0.00987812	0.759352	0.00010106	-0.000975257
191	MetAP2.Inhibitor..A832234_410	0.727905	-0.0252581	0.0781001	0.00334464	0.0022695
192	Venotoclax_412	0.65077	0.0197159	0.280446	0.00127862	0.000182327
193	CPI.613_415	1.33348	-0.126716	2.10158e-07	0.0285948	0.0275492
194	CAY10566_416	0.699103	-0.0105649	0.344445	0.000971596	-0.000114304
195	Ara.G_427	0.733759	-0.0123247	0.42092	0.000718261	-0.00038959
196	Pemetrexed_428	0.68742	-0.00545229	0.459701	0.000622737	-0.000515506
197	Alisertib_431	0.635456	0.0207849	0.00348206	0.00965847	0.00853308
198	Flavopiridol_432	0.660422	-0.00942906	0.225542	0.00158061	0.000505882
199	C.75_435	0.71673	-0.0106288	0.343963	0.00097886	-0.000112966
200	CAP.232..TT.232..TLN.232_436	0.803522	-0.0334929	0.0375475	0.00464765	0.00357623
201	Trichostatin.A_437	0.66687	-0.00224183	0.836543	4.58929e-05	-0.00103164
202	Panobinostat_438	0.644821	-0.00815992	0.501624	0.000486148	-0.000589755
203	LCL161_439	0.502193	0.0460453	0.00341883	0.00922626	0.00815516
204	IMD.0354_442	0.673107	-0.00722878	0.387288	0.000804674	-0.000270886
205	MIM1_446	0.684915	-0.00429704	0.651555	0.000219626	-0.000856564
206	ETP.45835_447	0.456363	0.0406476	0.0682809	0.00358113	0.00250624
207	CD532_449	0.675867	-0.0288606	0.0264383	0.00530388	0.00423085
208	NSC319726_461	0.684912	0.00495623	0.501043	0.000491173	-0.000592893
209	ARRY.520_474	0.682892	0.00440924	0.357208	0.000916491	-0.000163599
210	SB505124_476	0.714041	-0.0127904	0.198819	0.0017785	0.000702829
211	A.83.01_477	0.912421	-0.0583912	0.00324326	0.00928916	0.00822274
212	LDN.193189_478	0.671855	-0.00226869	0.863759	3.17101e-05	-0.00104468
213	FTY.720_546	0.712891	-0.019304	0.222054	0.0016238	0.000536245
214	BAM7_552	1.06098	-0.0814161	2.56602e-07	0.0283416	0.02729
215	AGI.6780_562	0.689501	-0.0134835	0.568265	0.000350983	-0.000726225
216	Kobe2602_563	0.83936	-0.0379395	0.0119284	0.00682176	0.00574689
217	LGK974_573	0.771477	-0.038525	0.119485	0.00261295	0.00153702
218	Wnt.C59_574	0.885292	-0.0839081	0.00332521	0.00926051	0.00819175
219	RU.SKI.43_576	0.906888	-0.0524899	0.000111467	0.0160905	0.0150222
220	AICA.Ribonucleotide_1001	0.707739	-0.00476163	0.485535	0.000524855	-0.000553327
221	Vinblastine_1004.x	0.682334	0.00323904	0.430959	0.000667777	-0.00040793
222	Cisplatin_1005.x	0.632588	0.0131039	0.236665	0.00150705	0.000432244
223	Cytarabine_1006.x	0.667844	0.0053513	0.40842	0.000738134	-0.000340983
224	Docetaxel_1007.x	0.662797	-0.00166685	0.796968	7.15926e-05	-0.00100941
225	Methotrexate_1008	0.654406	-0.0365153	0.00230252	0.00998893	0.0089198
226	Tretinoin_1009	0.548437	0.0308468	0.0692392	0.00357189	0.00249233
227	Gefitinib_1010.x	0.695284	-0.0262514	0.0797045	0.00330905	0.00223387
228	Navitoclax_1011.x	0.6443	0.014361	0.138171	0.00241668	0.00131922
229	Vorinostat_1012.x	0.652452	0.0154127	0.113139	0.00269944	0.00162592
230	Nilotinib_1013.x	0.546759	0.044123	0.0841734	0.00321038	0.00213625
231	Refametinib_1014	0.611933	0.0359282	9.80169e-06	0.0210142	0.0199512
232	CI.1040_1015	0.555239	0.0508977	0.000131377	0.015658	0.0145961
233	Temsirolimus_1016	0.671778	-0.0019913	0.765844	9.78379e-05	-0.00100459
234	Olaparib_1017.x	0.666584	0.000875527	0.961543	2.52023e-06	-0.0010809
235	Veliparib_1018	0.395785	0.0709736	0.00123659	0.0112356	0.0101655
236	Bosutinib_1019	0.693444	-0.0130282	0.25453	0.00140179	0.000323393
237	Lenalidomide_1020	0.686894	-0.00442632	0.804104	6.6402e-05	-0.00101228
238	Axitinib_1021.x	0.654397	0.00772837	0.536069	0.000413608	-0.000665859
239	AZD7762_1022.x	0.676489	0.0167272	0.00746369	0.00775427	0.00667574
240	GW441756_1023	0.890445	-0.0853529	0.0270182	0.00525233	0.00418156
241	Lestaurtinib_1024	0.691201	0.045559	2.53245e-08	0.0329435	0.0319003
242	SB216763_1025.x	0.43837	0.0532037	0.000442501	0.0133924	0.0123153
243	Tanespimycin_1026	0.665587	-0.00518141	0.271117	0.00130913	0.000229466
244	VX.702_1028	0.42037	0.0857143	0.00341623	0.00920792	0.0081391
245	Motesanib_1029	0.611448	0.0218059	0.577711	0.000333763	-0.000742304
246	KU.55933_1030.x	0.605833	0.0168653	0.282853	0.00124944	0.00016737
247	Elesclomol_1031	0.731232	0.0202531	0.0135418	0.00654489	0.00547551
248	Afatinib_1032.x	0.714734	-0.0491721	1.35384e-05	0.0203582	0.0192945
249	Vismodegib_1033	0.552045	0.0266337	0.199829	0.00178012	0.000698626
250	PLX.4720_1036.x	0.573094	0.0250336	0.0748129	0.00342746	0.00235009
251	BX795_1037	0.608929	0.031101	0.000923441	0.0117633	0.0106983
252	NU7441_1038.x	0.589064	0.0349276	0.108042	0.00278064	0.00170605
253	SL0101_1039	0.583486	0.0199413	0.279306	0.00126388	0.000185336
254	Doramapimod_1042.x	0.790876	-0.0289465	0.300933	0.00115179	7.66054e-05
255	JNK.Inhibitor.VIII_1043	0.485945	0.0420138	0.220452	0.00161574	0.00054105
256	Wee1.Inhibitor_1046.x	0.626169	0.0227316	0.127931	0.00249278	0.00141904
257	Nutlin.3a...._1047.x	0.496355	0.0493169	2.27581e-05	0.0194718	0.0183979
258	Mirin_1048.x	0.684162	-0.00296267	0.710362	0.000148685	-0.000928741
259	PD173074_1049.x	0.69349	-0.00910385	0.634635	0.000243451	-0.000833873
260	ZM447439_1050.x	0.545816	0.0572802	8.76577e-05	0.0164513	0.0153915
261	RO.3306_1052.x	0.78678	-0.0347905	0.110946	0.0027326	0.00165911
262	MK.2206_1053.x	0.668502	0.00313501	0.72542	0.000134588	-0.000955777
263	Palbociclib_1054.x	-0.123283	0.481525	1.43271e-10	0.0433186	0.0422888
264	Dactolisib_1057.x	0.721959	0.0215972	0.033702	0.00484526	0.00377405
265	Pictilisib_1058.x	0.64318	0.0203966	0.0861192	0.00318093	0.00210329
266	AZD8055_1059.x	0.669135	0.0173677	0.222693	0.00160707	0.000527727
267	PD0325901_1060.x	0.693965	0.0284992	0.0004271	0.0133192	0.0122537
268	SB590885_1061	0.718875	-0.01313	0.499503	0.000494177	-0.000588711
269	Selumetinib_1062	0.505732	0.0641205	0.000163189	0.0152078	0.0141466
270	AZD6482_1066	0.594461	0.0313301	0.0263552	0.00532117	0.00424584
271	CCT007093_1067	0.489537	0.0445038	0.0563171	0.00392391	0.00284939
272	EHT.1864_1069	0.726334	-0.015172	0.41976	0.000703141	-0.000376013
273	Avagacestat_1072	0.516679	0.0421723	0.696607	0.00016372	-0.00091253
274	BMS.536924_1091.x	0.601077	0.0326306	0.00048128	0.0132811	0.0121992
275	Cetuximab_1114	0.981746	-0.0513486	0.0193195	0.00588275	0.0048115
276	PF.4708671_1129.x	0.816479	-0.0379203	0.405333	0.000746295	-0.000330487
277	Serdemetan_1133	0.601825	0.0249107	0.159006	0.00213412	0.00105999
278	AZD4547_1135	0.603633	0.0231162	0.0058845	0.00815366	0.00708371
279	Capivasertib_1136	0.684763	-0.00561345	0.400077	0.000776544	-0.000319096
280	HG.5.113.01_1142	0.643486	0.016451	0.0581275	0.00385901	0.00278674
281	HG.5.88.01_1143	-0.507312	0.3536	3.84227e-17	0.0734732	0.0724759
282	TW.37_1149	0.674825	0.00974234	0.414175	0.000717873	-0.00035778
283	XMD11.85h_1158	0.585887	0.0221372	0.0856553	0.00318004	0.00210588
284	ZG.10_1161	0.656148	0.0101528	0.544877	0.000394726	-0.000681276
285	XMD8.92_1164	0.648502	0.00673852	0.412235	0.000723857	-0.00035179
286	QL.VIII.58_1166	0.648401	-0.0173924	0.147395	0.00225809	0.00118409
287	CCT.018159_1170	0.664273	0.00172102	0.863156	3.2029e-05	-0.00104552
288	Rucaparib_1175	0.658596	0.00370238	0.804392	6.69249e-05	-0.00102351
289	AZ20_1184	0.650728	0.0221945	0.0510417	0.00409166	0.00301964
290	KU.60019_1185	0.707443	-0.0117908	0.373004	0.000855304	-0.000221361
291	GSK269962A_1192.x	0.638572	0.0152344	0.116825	0.00268276	0.00159399
292	SB505124_1194.x	0.573263	0.0228847	0.267271	0.00132602	0.000249865
293	Tamoxifen_1199.x	0.474952	0.0526747	0.0377202	0.00463928	0.00356785
294	QL.XII.61_1203	0.576736	0.0240335	0.133737	0.00242664	0.00134935
295	JQ1_1218	0.344792	0.155905	3.38421e-09	0.0371766	0.0361334
296	PFI.1_1219	0.625522	0.0169562	0.159113	0.00213533	0.00106004
297	IOX2_1230	0.669908	-0.00884287	0.796995	7.14181e-05	-0.00100725
298	UNC0638_1236	0.853744	-0.0579641	4.20155e-07	0.0271941	0.026147
299	YK.4.279_1239.x	0.6686	0.000718354	0.91839	1.1307e-05	-0.00106511
300	CHIR.99021_1241	0.477888	0.0512247	5.57961e-05	0.0175638	0.0164924
301	X.5Z..7.Oxozeaenol_1242	0.652649	0.0207526	0.0307177	0.00503721	0.00396157
302	Piperlongumine_1243	0.680075	-0.0063001	0.705988	0.000153265	-0.000922997
303	Daporinad_1248.x	0.697272	0.0112785	0.0309819	0.0050651	0.00398012
304	Talazoparib_1259.x	0.666986	0.00193659	0.797753	7.19615e-05	-0.00102325
305	rTRAIL_1261	0.675203	0.00897873	0.470036	0.000575555	-0.000526347
306	UNC1215_1262	0.537617	0.0545978	0.121883	0.00257391	0.00150026
307	UNC0642_1263	0.692734	-0.0133635	0.641537	0.000233652	-0.000843683
308	SGC0946_1264	0.611662	0.0332304	0.363256	0.00089082	-0.000185806
309	ICL1100013_1266	0.612814	0.0301197	3.68288e-05	0.0182307	0.0171704
310	XAV939_1268.x	0.608376	0.0186716	0.173214	0.00202406	0.000934568
311	PLX.4720_1371	0.606923	0.0151068	0.261659	0.00138437	0.00028699
312	Trametinib_1372.x	0.694448	0.0311951	2.95775e-05	0.018773	0.0177076
313	Dabrafenib_1373.x	0.605019	0.0184113	0.145671	0.0022972	0.00121392
314	Temozolomide_1375.x	0.115252	0.0991981	4.66708e-05	0.0177159	0.0166574
315	Afatinib_1377	0.836395	-0.0479307	1.07272e-05	0.0214535	0.020359
316	Bleomycin..50.uM._1378	0.64501	0.00994824	0.0804778	0.0033536	0.00225838
317	AZD3514_1382	0.667164	0.000794294	0.958693	2.88921e-06	-0.00107353
318	Doxorubicin_1386	0.683406	0.00825704	0.256834	0.00138678	0.000309529
319	Bleomycin..10.uM._1392	0.654305	0.00709358	0.281333	0.00128094	0.000178603
320	Gemcitabine_1393	0.706995	0.0106232	0.144544	0.00229268	0.00121756
321	AZD6738_1394	0.648901	0.0126308	0.132112	0.00245499	0.00137422
322	AZD5438_1401.x	0.636764	0.0417604	0.00181607	0.0104322	0.00936589
323	AZD7762_1402	0.676853	0.015288	0.0288271	0.00513814	0.00406609
324	AZD6094_1403	0.292115	0.121649	0.000107622	0.0160232	0.0149641
325	Dyrk1b_0191_1407	0.587682	0.0353455	0.0183914	0.00596862	0.00489862
326	AZD4877_1409	0.197303	-0.127242	0.0639929	0.00368812	0.00261567
327	EphB4_9721_1413	0.637764	0.0147346	0.0780559	0.00334203	0.00226804
328	Fulvestrant_1414	4.04511	-0.857434	5.29929e-05	0.0174421	0.0163845
329	AZD8931_1416	0.708231	-0.0221923	0.00775391	0.00769714	0.0066162
330	FEN1_3940_1419	0.706537	-0.0167986	0.336044	0.000996235	-7.91186e-05
331	FGFR_0939_1421	0.685412	-0.00704837	0.633359	0.000245819	-0.00083383
332	FGFR_3831_1422	0.680512	-0.0031287	0.719602	0.000140147	-0.000946657
333	BPTES_1425	0.487247	0.0484717	0.011884	0.00683625	0.00576023
334	AZD7969_1426	0.643633	0.0112695	0.374752	0.000848155	-0.000227359
335	AZD5582_1427	0.72087	-0.0272863	0.000293632	0.0142961	0.0132141
336	IAP_5620_1428.x	0.808219	-0.035675	0.000922695	0.0118282	0.0107576
337	IAP_7638_1429	0.723228	-0.0135936	0.16197	0.00212932	0.00104232
338	IGFR_3801_1430	0.66628	0.015785	0.00268629	0.00966636	0.00859919
339	AZD1480_1432	0.705079	-0.0226009	0.123054	0.0025606	0.00148578
340	JAK1_3715_1433	0.589455	0.0188536	0.314743	0.00109379	1.2721e-05
341	JAK3_7406_1434	0.900199	-0.0691639	6.35867e-05	0.0170767	0.0160187
342	MCT1_6447_1436	0.655705	0.00336289	0.850167	3.84738e-05	-0.00103907
343	MCT4_1422_1437	0.540343	0.0308594	0.24108	0.00148059	0.000404604
344	AZD2014_1441.x	0.671821	0.0165532	0.220545	0.00161509	0.000540403
345	AZD8186_1444	0.62688	0.0231482	0.051084	0.00411227	0.00303447
346	AZD8835_1445	0.636843	0.0121568	0.320924	0.00106622	-1.48815e-05
347	PI3Ka_4409_1446	0.680676	-0.00465844	0.678088	0.00018654	-0.000895509
348	AZD1208_1449.x	0.628996	0.0117884	0.470033	0.000564361	-0.00051611
349	PLK_6522_1451	0.636092	-0.0151312	0.0200139	0.00581039	0.00474022
350	RAF_9304_1453	0.646972	0.0107542	0.260778	0.00136993	0.000287988
351	PARP_9495_1458	0.625241	0.025873	0.0463262	0.00429394	0.00321517
352	PARP_0108_1459	0.670744	0.00453449	0.467529	0.000574478	-0.000513037
353	PARP_9482_1460	0.70398	0.129162	0.000124672	0.0157292	0.0146697
354	TANK_1366_1461	0.624826	0.0179655	0.202775	0.00176658	0.000679181
355	AZD1332_1463.x	0.568917	0.0502158	0.00117888	0.0112695	0.0102052
356	TTK_3146_1464	0.678134	-0.00300503	0.662311	0.000205395	-0.00087081
357	SN.38_1490	0.812075	0.0347682	2.90909e-05	0.0190734	0.0179931
358	SN.38_1494	0.702991	0.00793393	0.200336	0.00177036	0.000692357
359	Olaparib_1495	0.624315	0.0124893	0.325195	0.00104531	-3.34779e-05
360	Cisplatin_1496	0.659991	0.00514173	0.587858	0.000316269	-0.000759817
361	AZD4547_1497	0.645195	0.0132332	0.296092	0.00118017	0.000100364
362	Selumetinib_1498	0.580224	0.0490023	1.19759e-06	0.0251843	0.0241304
363	Bicalutamide_1502	0.44585	0.0506899	0.0185068	0.00601503	0.00493461
364	Refametinib_1526	0.625588	0.0241371	0.0131901	0.0066446	0.0055672
365	Pictilisib_1527	0.655971	0.015802	0.137235	0.0023785	0.00130348
366	Pevonedistat_1529.x	0.672276	-0.00843805	0.341145	0.000979642	-0.00010038
367	PFI.3_1530	0.366939	0.0661557	0.0305613	0.00502496	0.00395394
368	Camptothecin_1003	0.691009	0.00974671	0.0859658	0.00317376	0.00209959
369	Vinblastine_1004.y	0.719554	0.0141665	0.0141132	0.0064668	0.00539734
370	Cisplatin_1005.y	0.641431	0.00874497	0.215019	0.00165789	0.000580926
371	Cytarabine_1006.y	0.647009	0.0140064	0.0446943	0.00434977	0.00327339
372	Docetaxel_1007.y	0.825272	0.0356548	1.43487e-05	0.0200675	0.0190127
373	Gefitinib_1010.y	0.73895	-0.0216643	0.035603	0.00478074	0.00370133
374	Navitoclax_1011.y	0.681596	-0.00366472	0.460986	0.000617773	-0.000517889
375	Vorinostat_1012.y	0.679684	-0.00553009	0.465922	0.000573022	-0.000503947
376	Nilotinib_1013.y	0.632706	0.0102678	0.20215	0.00177728	0.000686331
377	Olaparib_1017.y	0.609424	0.0139606	0.208515	0.00172057	0.000634304
378	Axitinib_1021.y	0.538394	0.0424065	0.0486834	0.00417675	0.00310482
379	AZD7762_1022.y	0.669412	0.0177876	0.00329357	0.00929911	0.00822809
380	SB216763_1025.y	-0.152479	0.156238	3.89912e-06	0.0226936	0.0216416
381	KU.55933_1030.y	0.681425	-0.00265519	0.893549	1.9285e-05	-0.00105712
382	Afatinib_1032.y	0.724257	-0.029727	0.00091659	0.0119056	0.0108292
383	Staurosporine_1034	0.759088	0.030229	3.26586e-05	0.0184333	0.0173756
384	PLX.4720_1036.y	0.518405	0.0338711	0.00350386	0.00921804	0.00814227
385	NU7441_1038.y	0.646892	0.00895954	0.7322	0.000126111	-0.00095018
386	Doramapimod_1042.y	0.772012	-0.0224893	0.380524	0.000827883	-0.000247652
387	Wee1.Inhibitor_1046.y	0.650284	0.00882282	0.29064	0.00120322	0.000126928
388	Nutlin.3a...._1047.y	0.557487	0.0247166	0.0017032	0.0109091	0.00980766
389	Mirin_1048.y	0.38934	0.0572785	4.31484e-07	0.0271403	0.0260931
390	PD173074_1049.y	0.613236	0.0142522	0.236831	0.00151906	0.000434935
391	ZM447439_1050.y	0.683833	-0.00475278	0.802231	6.75592e-05	-0.00100879
392	Alisertib_1051	0.628491	0.0217899	1.19863e-05	0.0211046	0.0200157
393	RO.3306_1052.y	0.826851	-0.0521371	0.402036	0.000756018	-0.000319595
394	MK.2206_1053.y	0.661981	0.00187659	0.836337	4.65119e-05	-0.00104276
395	Palbociclib_1054.y	0.521664	0.0397573	3.03068e-05	0.0188249	0.0177537
396	Dactolisib_1057.y	0.674801	0.00354471	0.628955	0.000251428	-0.000824728
397	Pictilisib_1058.y	0.660207	0.00626975	0.289937	0.00120803	0.00013058
398	AZD8055_1059.y	0.690462	0.115559	0.0143591	0.00643419	0.00536469
399	PD0325901_1060.y	0.656912	0.0272114	0.00170909	0.0105968	0.00952601
400	Obatoclax.Mesylate_1068	0.568894	0.0698082	4.09895e-08	0.031934	0.0308908
401	X5.Fluorouracil_1073	0.669439	-1.51848e-05	0.998145	5.82744e-09	-0.00107758
402	Dasatinib_1079	0.628206	0.0304569	7.59847e-08	0.0308813	0.0298302
403	Paclitaxel_1080	0.693676	0.00911556	0.169992	0.00202596	0.000951719
404	Crizotinib_1083	0.503838	0.0525218	1.23448e-05	0.0204357	0.0193779
405	Rapamycin_1084	0.619854	-0.022453	0.0201053	0.0058081	0.00473678
406	Sorafenib_1085	0.632873	0.0139726	0.15055	0.00222813	0.00115179
407	BI.2536_1086	0.665051	-0.0584704	2.10361e-08	0.0333903	0.0323453
408	Irinotecan_1088	0.62387	0.016535	0.00218076	0.0100954	0.00902642
409	Oxaliplatin_1089	0.505925	0.043589	2.77573e-08	0.0328274	0.0317818
410	BMS.536924_1091.y	0.590218	0.0381342	4.81272e-06	0.0222689	0.0212165
411	GSK1904529A_1093	0.679045	-0.0021147	0.885889	2.22283e-05	-0.0010565
412	Tozasertib_1096	0.586197	0.0286047	0.061356	0.00377497	0.00269913
413	PF.4708671_1129.y	0.33562	0.085983	0.000815149	0.0119968	0.0109333
414	PRIMA.1MET_1131	0.384138	0.0622915	6.03664e-09	0.0358476	0.0348076
415	Erlotinib_1168	0.767482	-0.0378965	0.00929589	0.00726735	0.00619759
416	Niraparib_1177	0.522569	0.0346997	0.000806716	0.012069	0.011001
417	MK.1775_1179	0.658561	0.014219	0.0321043	0.00494501	0.00387159
418	Dinaciclib_1180	0.676946	0.00330082	0.159681	0.00212724	0.00105311
419	Gemcitabine_1190	0.67894	0.0187629	1.90213e-05	0.0195628	0.018504
420	Bortezomib_1191	0.655881	-0.00293179	0.846886	4.01555e-05	-0.00103623
421	GSK269962A_1192.y	0.553399	0.0400896	0.130853	0.00245509	0.00138131
422	SB505124_1194.y	0.657997	0.00513699	0.795906	7.20481e-05	-0.0010043
423	Tamoxifen_1199.y	0.669797	3.48422e-05	0.998294	4.93351e-09	-0.00107874
424	Fulvestrant_1200	0.586464	0.0284905	0.157712	0.00215206	0.00107563
425	EPZ004777_1237	0.555607	0.0220743	0.086991	0.00314979	0.00207675
426	YK.4.279_1239.y	0.657371	0.00491723	0.124134	0.00254868	0.00147268
427	Daporinad_1248.y	0.691326	0.00562172	0.245986	0.00145797	0.000376123
428	BMS.345541_1249	0.656647	0.00374045	0.663475	0.000203889	-0.000872318
429	AZ960_1250	0.531655	0.065973	3.44461e-15	0.0646551	0.0636472
430	Talazoparib_1259.y	0.619522	0.0159261	0.0172093	0.00619301	0.00510569
431	XAV939_1268.y	0.118341	0.125066	2.85443e-10	0.0419299	0.0408986
432	Trametinib_1372.y	0.653799	0.0282521	2.68712e-05	0.0194059	0.0183164
433	Dabrafenib_1373.y	0.486917	0.0399402	0.000315338	0.0140291	0.0129563
434	Temozolomide_1375.y	0.396962	0.0460714	3.34123e-05	0.0184071	0.0173482
435	AZD5438_1401.y	0.588237	0.0339852	6.43364e-05	0.0170533	0.0159952
436	IAP_5620_1428.y	0.617596	0.0102152	0.365509	0.000889205	-0.000195606
437	AZD2014_1441.y	0.664345	0.00241539	0.770167	9.23217e-05	-0.00098866
438	AZD1208_1449.y	0.460967	0.039405	0.0212987	0.00571878	0.00464388
439	AZD1332_1463.y	0.503691	0.0435931	0.000112934	0.0159269	0.0148676
440	Ruxolitinib_1507	0.598649	0.0147771	0.41743	0.000708685	-0.000368138
441	Linsitinib_1510	0.561205	0.0290909	0.00180317	0.0105025	0.0094305
442	Epirubicin_1511	0.683886	0.0143797	0.0551056	0.00395434	0.00288217
443	Cyclophosphamide_1512	0.694071	-0.00468162	0.762819	9.80797e-05	-0.000978241
444	Pevonedistat_1529.y	0.65979	0.00990707	0.0491437	0.00419134	0.00311129
445	Sapitinib_1549	0.809831	-0.0370544	4.02192e-05	0.0184081	0.017327
446	Uprosertib_1553	0.679836	-0.00399891	0.451748	0.000620369	-0.000474241
447	LCL161_1557	0.825372	-0.0315591	0.0226499	0.00565244	0.00456809
448	Lapatinib_1558	0.778992	-0.0353743	1.02013e-05	0.0208433	0.0197848
449	Luminespib_1559	0.669598	-0.000197407	0.707278	0.000151858	-0.000924405
450	Alpelisib_1560	0.676594	-0.00211219	0.784229	8.14446e-05	-0.00100424
451	Taselisib_1561	0.679149	-0.00484177	0.31898	0.00107714	-6.28633e-06
452	EPZ5676_1563	0.549813	0.0215469	0.11042	0.00274067	0.00166719
453	SCH772984_1564	0.626075	0.0162495	0.0514178	0.00412279	0.00303914
454	IWP.2_1576	0.517515	0.0549467	0.00721209	0.00774515	0.00667706
455	Leflunomide_1578	0.258563	0.0823092	3.88678e-06	0.0227	0.021648
456	Entinostat_1593	0.672176	2.31832e-05	0.997211	1.32745e-08	-0.00108576
457	OSI.027_1594	1.80028	-0.244617	5.92098e-07	0.0265007	0.0254528
458	LGK974_1598	0.722078	-0.0128133	0.341878	0.000978792	-0.000103572
459	VE.822_1613	0.630019	0.01204	0.145552	0.00228862	0.00121002
460	WZ4003_1614	0.466711	0.0534784	0.000107669	0.0160911	0.0150274
461	CZC24832_1615	0.347112	0.063851	0.00429745	0.00874308	0.00767607
462	AZD5582_1617	0.671981	-0.000762761	0.919443	1.11847e-05	-0.0010817
463	GSK2606414_1618	0.614841	0.0146477	0.23681	0.00150937	0.000432246
464	PFI3_1620	0.447552	0.0422886	0.0311655	0.00498894	0.00391788
465	PCI.34051_1621	0.379303	0.0641047	9.19244e-06	0.0211218	0.0200602
466	Wnt.C59_1622	0.705666	-0.00841042	0.684551	0.000178126	-0.000900431
467	I.BET.762_1624	0.606227	0.0193247	0.0309924	0.00500994	0.0039366
468	RVX.208_1625	0.512918	0.0330823	0.199609	0.00177035	0.000695834
469	OTX015_1626	0.621263	0.0198779	0.00356282	0.00920526	0.00812714
470	GSK343_1627	0.505355	0.0582862	0.00452762	0.00865139	0.00758312
471	ML323_1629	0.789753	-0.0263795	0.0594264	0.00382374	0.00275028
472	Entospletinib_1630	0.38752	0.0755776	7.89354e-08	0.03064	0.0295943
473	PRT062607_1631	0.412435	0.0783281	9.3868e-12	0.0488499	0.047825
474	Ribociclib_1632	0.363299	0.0807721	0.0101582	0.00709046	0.00602166
475	AGI.6780_1634	0.795227	-0.0301648	0.123417	0.00255842	0.00148244
476	Picolinici.acid_1635	0.411107	0.0502724	0.00491877	0.00848193	0.00741463
477	AZD5153_1706	0.62332	0.0281389	3.08119e-05	0.0188729	0.0177971
478	CDK9_5576_1708	0.672099	0.0215442	0.0020319	0.0102012	0.00913578
479	CDK9_5038_1709	0.704764	0.0169359	0.00915322	0.00728906	0.00622048
480	Eg5_9814_1712	0.800006	0.0443881	2.47254e-08	0.0329571	0.031915
481	ERK_2440_1713	-0.435957	0.419383	1.27556e-18	0.0801568	0.0791667
482	ERK_6604_1714	0.511421	0.0475895	1.56729e-08	0.0339156	0.0328734
483	IRAK4_4710_1716	0.566997	0.0211562	0.119978	0.002606	0.00153006
484	JAK1_8709_1718	0.46041	0.0504259	0.000385053	0.0135111	0.0124469
485	AZD5991_1720	0.648589	0.00490216	0.504161	0.000494244	-0.000612628
486	PAK_5339_1730	0.581558	0.0377385	0.0280822	0.0051921	0.00411896
487	TAF1_5496_1732	0.782256	-0.029097	0.00203832	0.0102943	0.00921856
488	ULK1_4989_1733	0.623345	0.0195161	0.0326683	0.00491296	0.00383951
489	VSP34_8731_1734	0.572258	0.0404665	0.000453556	0.0131713	0.0121079
490	Selumetinib_1736	0.531649	0.0342128	8.20301e-06	0.0212617	0.0202048
491	IGF1R_3801_1738	0.627493	0.0243414	3.19784e-06	0.0232422	0.0221839
492	JAK_8517_1739	0.526814	0.0473256	6.75659e-07	0.0262617	0.0252124
493	AZD4547_1786	0.697214	-0.00960186	0.458547	0.000592212	-0.000484736
494	Ibrutinib_1799	0.822676	-0.0355023	9.78926e-05	0.0165126	0.0154342
495	Zoledronate_1802	0.646172	0.0062504	0.67586	0.000188269	-0.000887955
496	Acetalax_1804	0.820893	-0.0314418	3.33632e-05	0.0187102	0.0176342
497	Oxaliplatin_1806	0.498745	0.0343593	6.27628e-06	0.0219911	0.0209258
498	Carmustine_1807	0.611737	0.00948778	0.521681	0.000442087	-0.000633863
499	Topotecan_1808	0.665266	0.0190735	0.00177748	0.0104969	0.0094283
500	Teniposide_1809	0.647094	0.030194	3.06368e-06	0.0235309	0.0224637
501	Mitoxantrone_1810	0.642886	0.0438781	4.45318e-09	0.0366187	0.0355749
502	Dactinomycin_1811	0.730503	0.0245594	0.000793059	0.0121029	0.0110349
503	Fludarabine_1813	0.533291	0.027828	0.00825881	0.0076497	0.00655801
504	Nelarabine_1814	0.564756	0.0177984	0.16673	0.00207508	0.000991559
505	Fulvestrant_1816	0.561523	0.023565	0.186921	0.00188218	0.000803137
506	Vincristine_1818	0.698319	0.0185618	0.000189812	0.0149219	0.0138593
507	Docetaxel_1819	0.685366	0.00827949	0.0249858	0.00541464	0.00434058
508	Podophyllotoxin.bromide_1825	0.67641	0.0219013	0.00259583	0.00972279	0.00865683
509	Dihydrorotenone_1827	0.679859	-0.00931635	0.38412	0.000827949	-0.000264042
510	Gallibiscoquinazole_1830	0.656052	0.0052692	0.800135	6.90296e-05	-0.00100732
511	Elephantin_1835	0.548976	0.0335675	8.79176e-05	0.0164454	0.0153855
512	Sinularin_1838	0.690567	-0.00484718	0.634302	0.000246588	-0.000842468
513	Sabutoclax_1849	0.686643	0.0598839	3.25773e-09	0.0374531	0.0364046
514	LY2109761_1852	0.687701	-0.00347186	0.809599	6.25223e-05	-0.00101384
515	OF.1_1853	0.771454	-0.0241602	0.0706578	0.00354359	0.00246167
516	MN.64_1854	0.689709	-0.00417751	0.721203	0.000137435	-0.000941165
517	KRAS..G12C..Inhibitor.12_1855	0.539157	0.0292514	0.00638694	0.00801289	0.00694047
518	MG.132_1862	0.664854	-0.00334275	0.829751	4.97928e-05	-0.00102658
519	BDP.00009066_1866	0.567254	0.0414329	0.000559608	0.0127407	0.011678
520	Buparlisib_1873	0.629097	0.0387212	0.00348881	0.00914734	0.00808076
521	Ulixertinib_1908	0.607993	0.0222659	0.100372	0.00290641	0.00183195
522	Venetoclax_1909	0.649897	0.0123107	0.219136	0.00169236	0.000573185
523	ABT737_1910	0.676512	-0.000292922	0.96043	2.78933e-06	-0.00112971
524	Dactinomycin_1911	0.869744	0.0425723	3.95246e-07	0.0273467	0.0262986
525	Afuresertib_1912	0.669321	-0.000439055	0.962252	2.43331e-06	-0.00108334
526	AGI.5198_1913	0.589039	0.0173383	0.369884	0.000865595	-0.000209899
527	AZD3759_1915	0.733631	-0.0241026	0.136266	0.00239026	0.00131525
528	AZD5363_1916	0.69903	-0.0108242	0.203833	0.00175452	0.000669469
529	AZD6738_1917	0.647231	0.0102969	0.0698426	0.00353736	0.00246358
530	AZD8186_1918	0.653602	0.00464017	0.44803	0.000628564	-0.000462453
531	Osimertinib_1919	0.738179	-0.0414793	9.26458e-06	0.0212428	0.0201743
532	Cediranib_1922	0.651028	0.00864004	0.416554	0.000710589	-0.000365072
533	Ipatasertib_1924	0.773019	-0.0299686	0.00329645	0.00928741	0.00821753
534	GDC0810_1925	0.719832	-0.0101741	0.503221	0.000482529	-0.000593378
535	GNE.317_1926	0.663536	0.00967389	0.336242	0.000995418	-7.99365e-05
536	GSK2578215A_1927	0.556673	0.0229843	0.257003	0.0013843	0.000308206
537	I.BRD9_1928	0.672426	-0.000784225	0.951096	4.08178e-06	-0.00108051
538	Telomerase.Inhibitor.IX_1930	0.654462	0.023053	0.0147723	0.00638066	0.0053111
539	MIRA.1_1931	0.667741	0.000503317	0.972469	1.28555e-06	-0.00107746
540	NVP.ADW742_1932	0.612603	0.0203519	0.00947748	0.00722264	0.00615399
541	P22077_1933	0.732485	-0.0141012	0.169294	0.00203259	0.000958357
542	Savolitinib_1936	0.672714	-0.00113637	0.938701	6.36946e-06	-0.00107005
543	UMI.77_1939	0.653381	0.0057019	0.662409	0.000205489	-0.000871876
544	WIKI4_1940	0.621829	0.0128696	0.490656	0.000511541	-0.000564334
545	Sepantronium.bromide_1941	0.677343	0.00204426	0.20145	0.00175595	0.00068141
546	MIM1_1996	0.472584	0.0505791	0.000311188	0.0139502	0.0128853
547	WEHI.539_1997	0.700102	-0.00809349	0.293784	0.00119928	0.000112446
548	BPD.00008900_1998	0.434624	0.051935	0.00044632	0.0132316	0.0121659
549	Foretinib_2040	0.621362	0.0504312	1.43244e-06	0.0247681	0.023716
550	BIBR.1532_2043	0.56756	0.0207419	0.261236	0.00135847	0.000283505
551	Pyridostatin_2044	0.605615	0.018782	0.0654669	0.0036478	0.0025753
552	AMG.319_2045	0.570241	0.0205129	0.0909116	0.00308346	0.00200688
553	MK.8776_2046	0.675286	-0.00149028	0.87317	2.78647e-05	-0.001065
554	Ulixertinib_2047	0.651243	0.00879169	0.317131	0.00108305	1.97411e-06
555	Vinorelbine_2048	0.73033	0.0229469	3.94701e-06	0.0226931	0.02164
556	VX.11e_2096	0.605359	0.0216255	0.00905474	0.00744553	0.00635721
557	Uprosertib_2106	0.678208	-0.00325978	0.607447	0.00028604	-0.000797074
558	LJI308_2107	0.557735	0.0219832	0.214279	0.00166145	0.000585654
559	AZ6102_2109	0.609033	0.0228904	0.00127288	0.0111186	0.0100541
560	GSK591_2110	0.660159	0.00209585	0.878931	2.50701e-05	-0.00105482
561	VE821_2111	0.487877	0.0442973	5.03323e-05	0.0176585	0.0165942
562	AZD6482_2169	0.596121	0.0231514	0.30216	0.00114596	7.07702e-05
563	AT13148_2170	0.577275	0.025085	0.00442227	0.00868766	0.00762059
564	BMS.754807_2171	0.644421	0.0829401	7.39257e-08	0.03107	0.0300145
565	JQ1_2172	0.625407	0.0199738	0.142116	0.00232315	0.00124691
